# Supplementary material
Source: publisher figshare collection journal article supplement (https://acs.figshare.com/ndownloader/files/15573698)
Supplement: Supplementary file 1 [file 15573698]

# Visible-light Excitation of BODIPYs Enables Self-promoted Radical Arylation at their 3, 5-positions with Diazonium Salts

Dandan Wang,<sup>†</sup> Cheng Cheng,<sup>†</sup> Qinghua Wu,<sup>†</sup> Jun Wang,<sup>\*,‡</sup> Zhengxin Kang,<sup>†</sup> Xing Guo,<sup>†</sup> Hao Wu,<sup>†</sup> Erhong Hao,<sup>\*,†</sup> and Lijuan Jiao<sup>\*,†</sup>

<sup>†</sup>Laboratory of Functional Molecular Solids, Ministry of Education; School of Chemistry and Materials Science, Anhui Normal University, Wuhu, 241000, China

<sup>‡</sup>Department of Chemical and Chemical Engineering, Hefei Normal University, Hefei, 230601, China

\*E-mail: [junma9003@mail.hfnu.edu.cn](mailto:junma9003@mail.hfnu.edu.cn); [jiao421@ahnu.edu.cn](mailto:jiao421@ahnu.edu.cn); [haoehong@ahnu.edu.cn](mailto:haoehong@ahnu.edu.cn)

## Contents

|                                                                                 |     |
|---------------------------------------------------------------------------------|-----|
| 1. General information .....                                                    | S2  |
| 2. Excited state reduction potential of BODIPY <b>1a</b> .....                  | S3  |
| 3. Synthesis and characterization .....                                         | S5  |
| 4. Crystal data.....                                                            | S15 |
| 5. Mechanism studies.....                                                       | S19 |
| 6. Photophysical data .....                                                     | S21 |
| 7. Absorption and emission spectra.....                                         | S23 |
| 8. Cellular studies.....                                                        | S32 |
| 9. DFT calculations.....                                                        | S34 |
| 10. <sup>1</sup> H, <sup>13</sup> C and HRMS spectra for all new compounds..... | S41 |

## 1. General information

Reagents and solvents were used as received from commercial suppliers (Energy Chemicals, Shanghai, China) unless noted otherwise. The light source is optical parallel reactor (WP-TEC-1020SL, WATTCAS, Shanghai, China). All reactions were performed in oven-dried or flame-dried glassware unless stated otherwise and were monitored by TLC using 0.25 mm silica gel plates with UV indicator (60F-254).  $^1\text{H}$  and  $^{13}\text{C}$  NMR spectra were recorded on a 300, 400 or 500 MHz NMR spectrometer at room temperature. Chemical shifts ( $\delta$ ) are given in ppm relative to  $\text{CDCl}_3$  (7.26 ppm for  $^1\text{H}$  and 77 ppm for  $^{13}\text{C}$ ) or to internal TMS. High-resolution mass spectra (HRMS) were obtained using APCI-TOF and ESI-TOF in positive mode.

UV-visible absorption and fluorescence emission spectra were recorded on commercial spectrophotometers (Shimadzu UV-2450 and Edinburgh FS5 spectrometers, 190-900 nm scan range) at room temperature (10 mm quartz cuvette). Relative fluorescence quantum efficiencies of BODIPY derivatives were obtained by comparing the areas under the corrected emission spectrum of the test sample in various solvents with Cresly Violet perchlorate ( $\Phi = 0.54$  in methanol)<sup>1</sup> and Rhodamine B ( $\Phi = 0.49$  in Ethanol)<sup>2</sup> and 1,7-diphenyl-3,5-di(4-methoxyphenyl)-azadipyrromethene ( $\Phi = 0.36$  in chloroform).<sup>3</sup> Non-degassed, spectroscopic grade solvents and a 10 mm quartz cuvette were used. Dilute solutions ( $0.01 < A < 0.05$ ) were used to minimize the reabsorption effects. Quantum yields were determined using the following equation:

$$\Phi_X = \Phi_S (I_X/I_S) (A_S/A_X) (n_X/n_S)^2$$

Where  $\Phi_S$  stands for the reported quantum yield of the standard, I stands for the integrated emission spectra, A stands for the absorbance at the excitation wavelength and  $n$  stands for the refractive index of the solvent being used. X subscript stands for the test sample, and S subscript stands for the standard.

Cyclic voltammograms of 2 mM **1a** were measured in dichloromethane solution, containing 0.1 M TBAPF<sub>6</sub> as the supporting electrolyte, glassy carbon electrode as a working electrode, Pt wire as a counter electrode, and saturated calomel electrode (SCE) as reference electrode at 100 mV s<sup>-1</sup> of scanning rate at room temperature.

Crystals of compounds **3n**, **4b** and **5a** suitable for X-ray analysis were obtained *via* the slow diffusion of petroleum ether into their dichloromethane solutions. The vial containing this solution was placed, loosely capped, to promote the crystallization. A suitable crystal was chosen and mounted on a glass fiber using grease. Data were collected using a diffractometer equipped with a graphite crystal monochromator situated in the incident beam for data collection at room temperature. Cell parameters were retrieved using SMART software and refined using SAINT on all observed reflections. The determination of unit cell parameters and data collections were performed with Mo  $K\alpha$  radiation ( $\lambda$ ) at 0.71073 Å. Data reduction was performed using the SAINT software which corrects for Lp and decay. The structure was solved by the direct method using the SHELXS-97 program and refined by least squares method on  $F^2$ , SHELXL-2018/3, incorporated in SHELXTL V5.10. CCDC-1907874 (**3n**) CCDC-1907883 (**4b**) and CCDC-1907884 (**5a**) contain the supplementary crystallographic data for this paper. These data can be obtained free of charge from The Cambridge Crystallographic Data Centre *via* [www.ccdc.cam.ac.uk/data\\_request/cif](http://www.ccdc.cam.ac.uk/data_request/cif).

## 2. Determination of excited state reduction potential of BODIPY 1a

Excited state reduction potential of BODIPY **1a** was estimated to be - 0.58 V vs. SCE according to the following equations:<sup>4</sup>

$$E_{1/2}(\mathbf{1a}^+/\mathbf{1a}^*) = E^{\text{ox}} - E_{0,0}$$

where  $E^{\text{ox}}$  was obtained from its cyclic voltammetry spectrum (Figure S1);  $E_{0,0}$  was calculated from its photoluminescence maximum (526 nm as shown in Figure S2) using the equation  $E_{0,0} = hc / \lambda_{\text{max}} = 1240 \text{ nm} / \lambda_{\text{max}}$ .

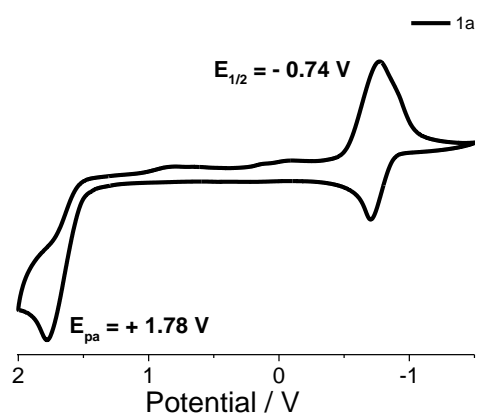

**Figure S1.** Cyclic voltammetry of BODIPY **1a** (2 mM in dichloromethane).  $E^{\text{ox}} = +1.78 \text{ V}$  vs. SCE)

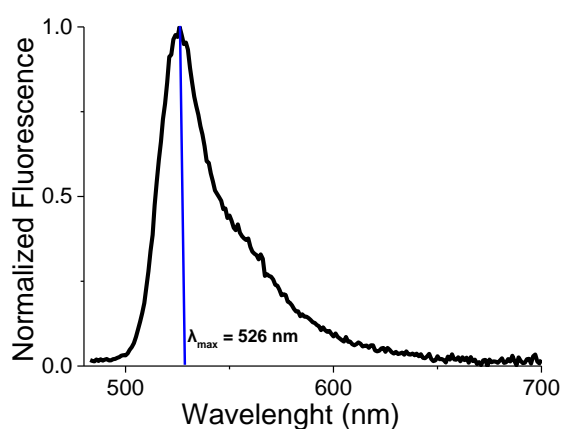

**Figure S2.** Fluorescence of BODIPY **1a** in dichloromethane

### 3. Synthesis and characterization

BODIPYs **1a-f** were synthesized by following the procedures described in our previous paper.<sup>5</sup> Diazonium salts **2a-j** were synthesized according to literature.<sup>6</sup>

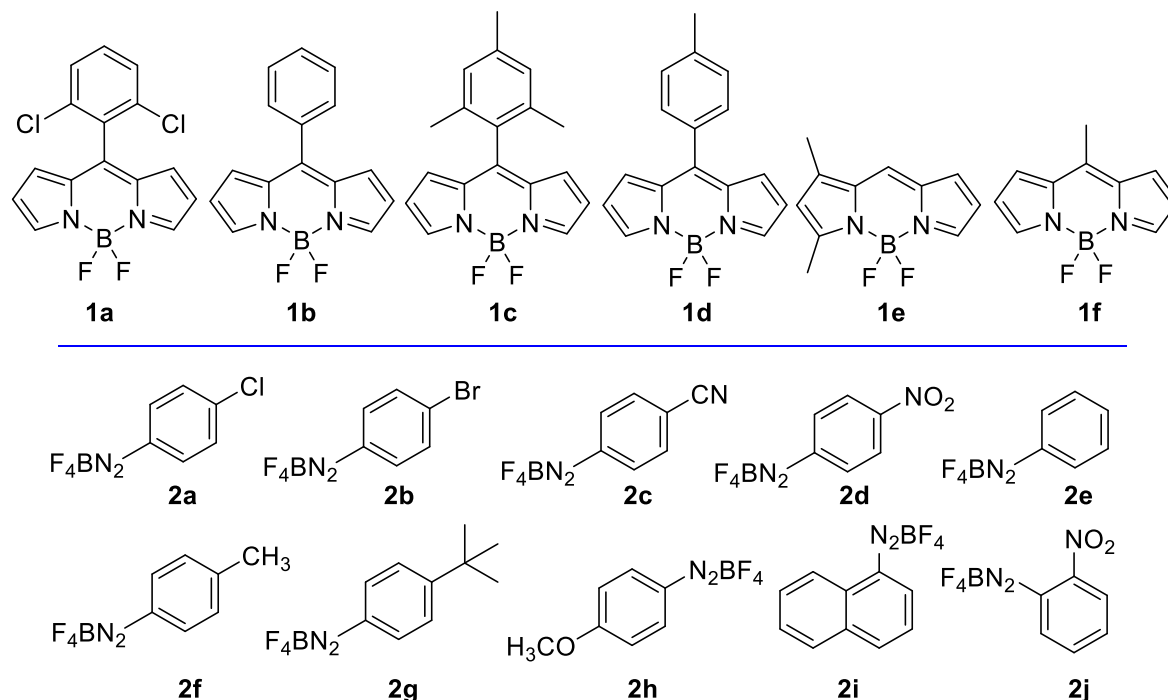

**Figure S3.** Chemical structure of BODIPYs **1a-f** and diazonium salts **2a-j**.

#### General radical C–H monoarylation procedure:

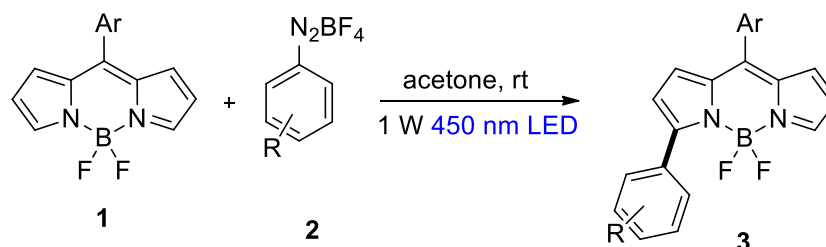

**General radical mono-arylation procedure of BODIPYs:** To 2.0 ml acetone in a 10 ml reaction tube were added BODIPY **1** (0.1 mmol) and diazonium salt **2** (0.12 mmol). The mixture was irradiated with 1 W blue LED at room temperature for 1 h, and TLC was used to follow the reaction. Upon the completion of the reaction, the mixture was poured into aqueous NaHCO<sub>3</sub> and was extracted with dichloromethane (30 mL × 3). Organic layers were combined, dried over anhydrous Na<sub>2</sub>SO<sub>4</sub>, and organic solvent was removed under vacuum. The crude product was purified by column chromatography (eluent, petroleum ether/dichloromethane: 2:1-1:1, v/v) on silica to afford the desired BODIPYs **3** as red solids.

**BODIPY 3a:** BODIPY **1a** (34 mg, 0.1 mmol) and diazonium salt **2a** (27 mg, 0.12 mmol) for 1 h affords **3a** in 52% (24 mg) isolated yield.  $^1\text{H}$  NMR (500 MHz,  $\text{CDCl}_3$ )  $\delta$ : 7.95 (d,  $J = 7.7$  Hz, 2H), 7.87 (s, 1H), 7.52 - 7.41 (m, 5H), 6.74 (d,  $J = 4.2$  Hz, 1H), 6.65 (d,  $J = 3.7$  Hz, 2H), 6.51 (d,  $J = 3.0$  Hz, 1H).  $^{13}\text{C}$  NMR (126 MHz,  $\text{CDCl}_3$ )  $\delta$ : 159.82, 144.07, 139.15, 137.08, 136.64, 135.45, 134.06, 131.67, 131.36, 130.99, 130.41, 128.86, 128.64, 128.38, 121.39, 119.06. HRMS calcd. For  $\text{C}_{21}\text{H}_{12}\text{BCl}_3\text{FN}_2$   $[\text{M-F}]^+$ : 427.0143, found 427.0167.

**Synthesis of 3a at 1 mmol scale:** To 4.0 ml acetone in a 10 ml reaction tube were added BODIPY **1a** (1 mmol, 340 mg) and diazonium salt **2** (1.2 mmol, 270 mg). The mixture was irradiated with 1 W blue LED at room temperature for 2 h, and TLC was used to follow the reaction. Upon the completion of the reaction, the mixture was poured into aqueous  $\text{NaHCO}_3$  and was extracted with dichloromethane (30 mL  $\times$  3). Organic layers were combined, dried over anhydrous  $\text{Na}_2\text{SO}_4$ , and organic solvent was removed under vacuum. The crude product was purified by column chromatography (eluent, petroleum ether/dichloromethane: 2:1, v/v) on silica to afford the desired BODIPYs **3a** in 46% (205 mg) as orange solid.

**BODIPY 3b:** BODIPY **1a** (34 mg, 0.1 mmol) and diazonium salt **2b** (34 mg, 0.12 mmol) for 1 h affords **3b** in 47% (23 mg) isolated yield.  $^1\text{H}$  NMR (500 MHz,  $\text{CDCl}_3$ )  $\delta$ : 7.87 (d,  $J = 8.2$  Hz, 3H), 7.63 (d,  $J = 8.4$  Hz, 2H), 7.50 (d,  $J = 7.9$  Hz, 2H), 7.45 - 7.42 (m, 1H), 6.74 (d,  $J = 4.2$  Hz, 1H), 6.65 - 6.64 (m, 2H), 6.51 (d,  $J = 3.1$  Hz, 1H).  $^{13}\text{C}$  NMR (126 MHz,  $\text{CDCl}_3$ )  $\delta$ : 159.83, 144.16, 139.20, 137.15, 135.51, 134.12, 131.82, 131.68, 131.36, 131.18, 130.96, 130.89, 128.72, 128.39, 125.16, 121.33, 119.09. HRMS calcd. For  $\text{C}_{21}\text{H}_{13}\text{BCl}_3\text{F}_2\text{N}_2$   $[\text{M+H}]^+$ : 490.9695, found 490.9703.

**BODIPY 3c:** BODIPY **1a** (34 mg, 0.1 mmol) and diazonium salt **2c** (30 mg, 0.12 mmol) for 1 h affords **3c** in 54% (34 mg) isolated yield.  $^1\text{H}$  NMR (300 MHz,  $\text{CDCl}_3$ )  $\delta$ : 8.10 (d,  $J = 8.5$  Hz, 2H), 7.95 (s, 1H), 7.79 (d,  $J = 8.5$  Hz, 2H), 7.59 - 7.40 (m, 3H), 6.74 (t,  $J = 4.5$  Hz, 2H), 6.67 (d,  $J = 4.0$  Hz, 1H), 6.56 (d,  $J = 3.0$  Hz, 1H).  $^{13}\text{C}$  NMR (75 MHz,  $\text{CDCl}_3$ )  $\delta$ : 157.46, 146.09, 140.32, 137.03, 136.35, 135.31, 134.92, 132.28, 131.64, 131.48, 131.13, 130.59, 130.28, 130.22, 130.17, 128.54, 121.12, 120.12, 118.83, 113.39. HRMS calcd. For  $\text{C}_{22}\text{H}_{12}\text{BCl}_2\text{FN}_3$   $[\text{M-F}]^+$ : 418.0485 found 418.0509.

**BODIPY 3d:** BODIPY **1a** (34 mg, 0.1 mmol) and diazonium salt **2d** (29 mg, 0.12 mmol) for 1 h affords **3d** in 42% (19 mg) isolated yield.  $^1\text{H}$  NMR (500 MHz,  $\text{CDCl}_3$ )

$\delta$ : 8.34 (d,  $J$  = 8.7 Hz, 2H), 8.15 (d,  $J$  = 8.7 Hz, 2H), 7.96 (s, 1H), 7.52 (d,  $J$  = 7.1 Hz, 2H), 7.46 - 7.46 (m, 1H), 6.75 (t,  $J$  = 4.0 Hz, 2H), 6.70 (d,  $J$  = 4.3 Hz, 1H), 6.57 (d,  $J$  = 4.1 Hz, 1H).  $^{13}\text{C}$  NMR (126 MHz,  $\text{CDCl}_3$ )  $\delta$ : 156.73, 148.32, 146.42, 140.40, 138.27, 137.05, 135.39, 134.97, 131.59, 131.33, 130.48, 130.37, 128.46, 123.70, 121.08, 120.26, 105.12. HRMS calcd. For  $\text{C}_{21}\text{H}_{12}\text{BCl}_2\text{FN}_3\text{O}_2$   $[\text{M-F}]^+$ : 483.0384, found 483.0382.

**BODIPY 3e:** BODIPY **1a** (34 mg, 0.1 mmol) and diazonium salt **2e** (25 mg, 0.12 mmol) for 12 h affords **3e** in 40% (16 mg) isolated yield.  $^1\text{H}$  NMR (500 MHz,  $\text{CDCl}_3$ )  $\delta$ : 8.00 (d,  $J$  = 6.6 Hz, 2H), 7.85 (s, 1H), 7.50 - 7.48 (m, 5H), 7.45 - 7.41 (m, 1H), 6.75 (d,  $J$  = 3.6 Hz, 1H), 6.68 (d,  $J$  = 4.0 Hz, 1H), 6.62 (d,  $J$  = 2.6 Hz, 1H), 6.49 (d,  $J$  = 2.1 Hz, 1H).  $^{13}\text{C}$  NMR (126 MHz,  $\text{CDCl}_3$ )  $\delta$ : 161.76, 143.35, 138.85, 137.15, 135.55, 133.77, 131.95, 131.78, 131.28, 131.13, 130.47, 129.69, 128.53, 128.36, 128.07, 121.83, 118.66. HRMS calcd. For  $\text{C}_{21}\text{H}_{13}\text{BCl}_2\text{FN}_2$   $[\text{M-F}]^+$ : 393.0533, found 393.0552.

**BODIPY 3f:** BODIPY **1a** (34 mg, 0.1 mmol) and diazonium salt **2f** (26 mg, 0.12 mmol) for 1 h affords **3f** in 45% (20 mg) isolated yield.  $^1\text{H}$  NMR (500 MHz,  $\text{CDCl}_3$ )  $\delta$ : 7.92 (d,  $J$  = 8.0 Hz, 2H), 7.82 (s, 1H), 7.48 (d,  $J$  = 7.7 Hz, 2H), 7.43 - 7.41 (m, 1H), 7.31 (d,  $J$  = 8.0 Hz, 2H), 6.74 (d,  $J$  = 4.4 Hz, 1H), 6.69 (d,  $J$  = 4.4 Hz, 1H), 6.59 (d,  $J$  = 4.0 Hz, 1H), 6.46 (d,  $J$  = 3.6 Hz, 1H), 2.43 (s, 3H).  $^{13}\text{C}$  NMR (126 MHz,  $\text{CDCl}_3$ )  $\delta$ : 162.20, 142.63, 141.07, 138.25, 137.27, 135.56, 133.55, 131.84, 131.22, 129.70, 129.35, 129.03, 128.33, 127.49, 121.91, 118.30, 21.72. HRMS calcd. For  $\text{C}_{22}\text{H}_{15}\text{BCl}_2\text{FN}_2$   $[\text{M-F}]^+$ : 407.0689, found 407.0672.

**BODIPY 3g:** BODIPY **1a** (34 mg, 0.1 mmol) and diazonium salt **2g** (30 mg, 0.12 mmol) for 1 h affords **3g** in 49% (28 mg) isolated yield.  $^1\text{H}$  NMR (500 MHz,  $\text{CDCl}_3$ )  $\delta$ : 7.97 (d,  $J$  = 8.3 Hz, 2H), 7.82 (s, 1H), 7.53 - 7.48 (m, 4H), 7.44 - 7.41 (m, 1H), 6.74 (d,  $J$  = 4.3 Hz, 1H), 6.70 (d,  $J$  = 4.4 Hz, 1H), 6.59 (d,  $J$  = 4.0 Hz, 1H), 6.47 (d,  $J$  = 2.8 Hz, 1H), 1.37 (s, 9H).  $^{13}\text{C}$  NMR (126 MHz,  $\text{CDCl}_3$ )  $\delta$ : 162.40, 154.21, 142.75, 138.86, 137.61, 135.86, 133.77, 132.11, 131.53, 129.83, 129.19, 128.61, 127.71, 125.89, 122.25, 118.57, 35.36, 31.58. HRMS calcd. For  $\text{C}_{25}\text{H}_{21}\text{BCl}_2\text{FN}_2$   $[\text{M-F}]^+$ : 449.1159, found 449.1142.

**BODIPY 3h:** BODIPY **1a** (34 mg, 0.1 mmol) and diazonium salt **2h** (27 mg, 0.12 mmol) for 1 h affords **3h** in 30% (14 mg) isolated yield.  $^1\text{H}$  NMR (500 MHz,  $\text{CDCl}_3$ )  $\delta$ : 8.04 (d,  $J$  = 7.0 Hz, 2H), 7.80 (s, 1H), 7.49 - 7.47 (m, 2H), 7.43 - 7.41 (m, 1H), 7.03

(d,  $J$  = 8.9 Hz, 2H), 6.73 (d,  $J$  = 9.5 Hz, 1H), 6.71 (d,  $J$  = 9.5 Hz, 1H), 6.56 (s, 1H), 6.46 (s, 1H), 3.88 (s, 3H).  $^{13}\text{C}$  NMR (75 MHz,  $\text{CDCl}_3$ )  $\delta$ : 162.08, 161.75, 141.83, 137.49, 135.61, 133.31, 131.92, 131.7, 131.42, 131.17, 128.32, 126.85, 124.20, 121.92, 117.98, 114.14, 55.53. HRMS calcd. For  $\text{C}_{22}\text{H}_{15}\text{BCl}_2\text{FN}_2\text{O}$   $[\text{M-F}]^+$ : 423.0639, found 423.0663.

**BODIPY 3i:** BODIPY **1a** (34 mg, 0.1 mmol) and diazonium salt **2i** (30 mg, 0.12 mmol) for 1 h affords **3i** in 35% (16 mg) isolated yield.  $^1\text{H}$  NMR (500 MHz,  $\text{CDCl}_3$ )  $\delta$ : 8.55 (s, 1H), 8.11 - 8.09 (m, 1H), 7.98 - 7.94 (m, 2H), 7.89 - 7.86 (m, 2H), 7.57 - 7.49 (m, 4H), 7.43 - 7.41 (m, 1H), 6.81 (d,  $J$  = 4.4 Hz, 1H), 6.78 (d,  $J$  = 4.5 Hz, 1H), 6.63 (d,  $J$  = 4.0 Hz, 1H), 6.49 (d,  $J$  = 3.0 Hz, 1H).  $^{13}\text{C}$  NMR (75 MHz,  $\text{CDCl}_3$ )  $\delta$ : 161.64, 143.32, 138.64, 137.39, 135.57, 134.13, 133.85, 133.07, 131.82, 131.28, 131.13, 130.32, 129.31, 128.36, 128.14, 128.00, 127.84, 127.64, 126.68, 126.53, 126.48, 126.42, 122.18, 118.64. HRMS  $\text{C}_{25}\text{H}_{15}\text{BCl}_2\text{FN}_2$   $[\text{M-F}]^+$ : 443.0689, found 443.0705.

**BODIPY 3j:** BODIPY **1b** (28 mg, 0.1 mmol) and diazonium salt **2c** (30 mg, 0.12 mmol) for 1 h affords **3j** in 41% (15 mg) isolated yield.  $^1\text{H}$  NMR (500 MHz,  $\text{CDCl}_3$ )  $\delta$ : 8.05 (d,  $J$  = 8.5 Hz, 2H), 7.92 (s, 1H), 7.76 (d,  $J$  = 8.5 Hz, 2H), 7.60 - 7.55 (m, 5H), 6.99 (d,  $J$  = 4.0 Hz, 1H), 6.96 (d,  $J$  = 4.0 Hz, 1H), 6.68 (d,  $J$  = 4.0 Hz, 1H), 6.59 (d,  $J$  = 3.3 Hz, 1H).  $^{13}\text{C}$  NMR (126 MHz,  $\text{CDCl}_3$ )  $\delta$ : 156.31, 147.07, 144.76, 137.35, 136.79, 134.97, 133.90, 132.31, 132.18, 131.71, 130.95, 130.69, 130.10, 130.07, 130.04, 128.65, 120.43, 119.47, 118.81, 113.08. HRMS  $\text{C}_{22}\text{H}_{14}\text{BFN}_3$   $[\text{M-F}]^+$ : 350.1265, found 350.1269.

**BODIPY 3k:** BODIPY **1c** (31 mg, 0.1 mmol) and diazonium salt **2c** (30 mg, 0.12 mmol) for 1 h affords **3k** in 50% (21 mg) isolated yield.  $^1\text{H}$  NMR (500 MHz,  $\text{CDCl}_3$ )  $\delta$ : 8.06 (d,  $J$  = 8.0 Hz, 2H), 7.89 (s, 1H), 7.76 (d,  $J$  = 8.5 Hz, 2H), 6.98 (s, 2H), 6.72 (t,  $J$  = 4.4 Hz, 2H), 6.61 (d,  $J$  = 4.5 Hz, 1H), 6.51 (d,  $J$  = 4.0 Hz, 1H), 2.38 (s, 3H), 2.14 (s, 6H).  $^{13}\text{C}$  NMR (126 MHz,  $\text{CDCl}_3$ )  $\delta$ : 156.25, 147.31, 144.87, 139.16, 137.68, 136.71, 136.56, 135.40, 132.17, 130.73, 130.36, 130.04, 129.77, 128.39, 120.41, 119.51, 118.82, 113.03, 21.29, 20.18. HRMS  $\text{C}_{25}\text{H}_{20}\text{BFN}_3$   $[\text{M-F}]^+$ : 392.1734, found 392.1730.

**BODIPY 3l:** BODIPY **1d** (30 mg, 0.1 mmol) and diazonium salt **2c** (30 mg, 0.12 mmol) for 1 h affords **3l** in 37% (15 mg) isolated yield.  $^1\text{H}$  NMR (500 MHz,  $\text{CDCl}_3$ )  $\delta$ : 8.04 (d,  $J$  = 8.1 Hz, 2H), 7.90 (s, 1H), 7.76 (d,  $J$  = 8.2 Hz, 2H), 7.57 (d,  $J$  = 8.4 Hz, 2H), 7.08 (d,  $J$  = 8.4 Hz, 2H), 7.02 - 7.00 (m, 2H), 6.68 (d,  $J$  = 4.3 Hz, 1H), 6.60 (d,  $J$



= 2.1 Hz, 1H), 3.93 (s, 3H).  $^{13}\text{C}$  NMR (125 MHz,  $\text{CDCl}_3$ )  $\delta$ : 162.27, 155.57, 147.15, 144.07, 137.26, 136.94, 134.82, 132.63, 132.15, 131.45, 130.04, 126.39, 120.18, 119.22, 118.85, 114.26, 112.92, 55.71. HRMS  $\text{C}_{23}\text{H}_{16}\text{BFN}_2\text{O}$   $[\text{M-F}]^+$ : 380.1370, found 380.1360.

**BODIPY 3m:** BODIPY **1e** (22 mg, 0.1 mmol) and diazonium salt **2c** (26 mg, 0.12 mmol) for 1 h affords **3m** in 48% (16 mg) isolated yield.  $^1\text{H}$  NMR (500 MHz,  $\text{CDCl}_3$ )  $\delta$ : 7.99 (d,  $J = 8.5$  Hz, 2H), 7.71 (d,  $J = 8.5$  Hz, 2H), 7.26 (s, 1H), 6.99 (d,  $J = 4.0$  Hz, 1H), 6.58 (d,  $J = 4.0$  Hz, 1H), 6.20 (s, 1H), 2.57 (s, 3H), 2.30 (s, 3H).  $^{13}\text{C}$  NMR (126 MHz,  $\text{CDCl}_3$ )  $\delta$ : 164.06, 151.79, 145.80, 137.64, 136.67, 135.16, 132.07, 129.81, 129.78, 129.75, 127.22, 124.42, 122.24, 119.06, 118.52, 112.10, 15.48, 11.56. HRMS  $\text{C}_{18}\text{H}_{14}\text{BFN}_3$   $[\text{M-F}]^+$ : 302.1265, found 302.1270.

**BODIPY 3n:** BODIPY **1c** (31 mg, 0.1 mmol) and diazonium salt **2j** (29 mg, 0.12 mmol) for 1 h affords **3n** in 38% (17 mg) isolated yield.  $^1\text{H}$  NMR (500 MHz,  $\text{CDCl}_3$ )  $\delta$ : 8.21 (d,  $J = 8.5$  Hz, 1H), 7.75 - 7.70 (m, 3H), 7.66 - 7.63 (m, 1H), 6.98 (s, 2H), 6.76 (d,  $J = 4.0$  Hz, 1H), 6.66 (d,  $J = 4.0$  Hz, 1H), 6.44 (d,  $J = 4.2$  Hz, 1H), 6.42 (d,  $J = 3.6$  Hz, 1H), 2.38 (s, 3H), 2.17 (s, 6H).  $^{13}\text{C}$  NMR (126 MHz,  $\text{CDCl}_3$ )  $\delta$ : 154.41, 148.60, 147.30, 144.09, 139.03, 136.64, 136.26, 135.31, 132.85, 132.13, 130.48, 129.94, 129.87, 128.34, 128.04, 124.67, 119.94, 118.75, 21.28, 20.17. HRMS  $\text{C}_{24}\text{H}_{20}\text{BFN}_3\text{O}_2$   $[\text{M-F}]^+$ : 412.1633, found 412.1630.

**BODIPY 3o:** BODIPY **1f** (21 mg, 0.1 mmol) and diazonium salt **2a** (27 mg, 0.12 mmol) for 1 h affords **3o** in 42% (13 mg) isolated yield.  $^1\text{H}$  NMR (400 MHz,  $\text{CDCl}_3$ )  $\delta$ : 7.88 - 7.83 (m, 2H), 7.77 (s, 1H), 7.47 - 7.41 (m, 2H), 7.37 (d,  $J = 4.3$  Hz, 1H), 7.25 (s, 1H), 6.65 (d,  $J = 4.2$  Hz, 1H), 6.53 (d,  $J = 3.4$  Hz, 1H), 2.64 (s, 3H).  $^{13}\text{C}$  NMR (101 MHz,  $\text{CDCl}_3$ )  $\delta$ : 157.99, 144.28, 142.55, 137.68, 136.22, 135.13, 130.96, 130.92, 130.89, 129.07, 128.83, 127.14, 120.23, 118.16, 16.32. HRMS  $\text{C}_{16}\text{H}_{13}\text{BClF}_2\text{N}_2$   $[\text{M+H}]^+$ : 317.0828, found 317.08255.

#### General radical C–H diarylation procedure:

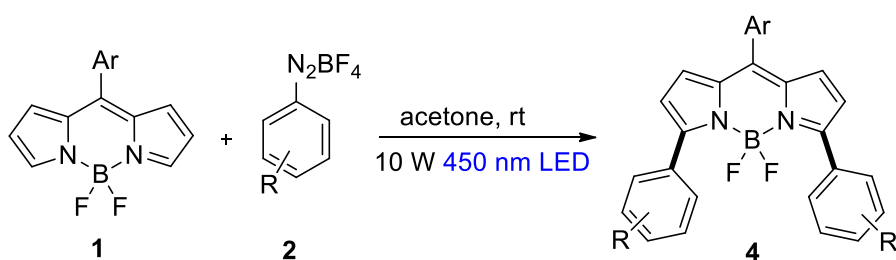

**General radical dis-arylation procedure of BODIPYs:** To 2.0 ml acetone in a 10 ml reaction tube were added BODIPY **1** (0.1 mmol) and diazonium salt **2** (0.4 mmol). The mixture was irradiated with 10 W blue LED at room temperature around 3h, and TLC was used to follow the reaction. Upon the completion of the reaction, the mixture was poured into aqueous NaHCO<sub>3</sub> and was extracted with dichloromethane (30 mL × 3). Organic layers were combined, dried over anhydrous Na<sub>2</sub>SO<sub>4</sub>, and organic solvent was removed under vacuum. The crude product was purified by column chromatography (eluent, petroleum ether/dichloromethane: 2:1-1:1, v/v) on silica to afford the desired BODIPYs **4** as dark red solids.

**BODIPY 4a:** BODIPY **1a** (34 mg, 0.1 mmol) and diazonium salt **2a** (90 mg, 0.4 mmol) for 3 h affords **4a** in 68% (38mg) isolated yield. <sup>1</sup>H NMR (300 MHz, CDCl<sub>3</sub>) δ: 7.85 (d, *J* = 8.6 Hz, 4H), 7.53 - 7.50 (m, 2H), 7.47 - 7.40 (m, 5H), 6.68 (d, *J* = 4.0 Hz, 2H), 6.60 (d, *J* = 4.0 Hz, 2H). <sup>13</sup>C NMR (75 MHz, CDCl<sub>3</sub>) δ: 158.67, 136.28, 135.76, 131.32, 131.02, 130.96, 130.91, 130.80, 129.49, 128.79, 128.40, 127.91, 127.58, 121.46. HRMS calcd. For C<sub>27</sub>H<sub>15</sub>BCl<sub>4</sub>FN<sub>2</sub> [M-F]<sup>+</sup>: 537.0066, found 537.0052.

**Synthesis of 4a at 1 mmol scale:** To 4.0 ml acetone in a 10 ml reaction tube were added BODIPY **1a** (1 mmol, 340 mg) and diazonium salt **2** (4 mmol, 900 mg). The mixture was irradiated with 10 W blue LED at room temperature for 6 h, and TLC was used to follow the reaction. Upon the completion of the reaction, the mixture was poured into aqueous NaHCO<sub>3</sub> and was extracted with dichloromethane (30 mL × 3). Organic layers were combined, dried over anhydrous Na<sub>2</sub>SO<sub>4</sub>, and organic solvent was removed under vacuum. The crude product was purified by column chromatography (eluent, petroleum ether/dichloromethane: 2:1, v/v) on silica to afford the desired BODIPYs **4a** in 52% (289 mg) as red solid.

**BODIPY 4b:** BODIPY **1a** (34 mg, 0.1 mmol) and diazonium salt **2b** (136 mg, 0.6 mmol) for 24 h affords **4b** in 68% (44 mg) isolated yield. <sup>1</sup>H NMR (500 MHz, CDCl<sub>3</sub>) δ: 7.78 (d, *J* = 8.5 Hz, 4H), 7.57 (d, *J* = 8.6 Hz, 4H), 7.51 (d, *J* = 7.6 Hz, 2H), 7.46 - 7.43 (m, 1H), 6.68 (d, *J* = 4.3 Hz, 2H), 6.60 (d, *J* = 4.3 Hz, 2H). <sup>13</sup>C NMR (126 MHz, CDCl<sub>3</sub>) δ: 158.70, 137.74, 136.33, 135.71, 131.86, 131.74, 131.33, 131.23, 131.1, 129.54, 128.40, 124.79, 121.49. HRMS calcd. For C<sub>27</sub>H<sub>15</sub>BBr<sub>2</sub>Cl<sub>2</sub>F<sub>2</sub>N<sub>2</sub>Na [M+Na]<sup>+</sup>: 666.8932, found 666.8939.

**BODIPY 4c:** BODIPY **1a** (34 mg, 0.1 mmol) and diazonium salt **2c** (93 mg, 0.4 mmol) for 3 h affords **4a** in 67% (36 mg) isolated yield. <sup>1</sup>H NMR (300 MHz, CDCl<sub>3</sub>)

$\delta$ : 8.01 (d,  $J$  = 8.0 Hz, 4H), 7.74 (d,  $J$  = 8.0 Hz, 4H), 7.56 - 7.48 (m, 3H), 6.77 (d,  $J$  = 4.0 Hz, 2H), 6.67 (d,  $J$  = 4.0 Hz, 2H).  $^{13}\text{C}$  NMR (126 MHz,  $\text{CDCl}_3$ )  $\delta$ : 157.94, 139.53, 136.90, 136.36, 135.59, 132.20, 131.65, 131.44, 130.32, 130.17, 128.52, 121.99, 118.61, 113.46. HRMS calcd. For  $\text{C}_{29}\text{H}_{15}\text{BCl}_2\text{FN}_4$  [M-F] $^+$ : 519.0751, found 519.0763.

**BODIPY 4d:** BODIPY **1a** (34 mg, 0.1 mmol) and diazonium salt **2d** (95 mg, 0.4 mmol) for 3 h affords **4d** in 61% (35 mg) isolated yield.  $^1\text{H}$  NMR (500 MHz,  $\text{CDCl}_3$ )  $\delta$ : 8.30 (d,  $J$  = 8.8 Hz, 4H), 8.06 (d,  $J$  = 8.8 Hz, 4H), 7.56 - 7.54 (m, 2H), 7.49 - 7.48 (m, 1H), 6.80 (d,  $J$  = 4.3 Hz, 2H), 6.71 (d,  $J$  = 4.3 Hz, 2H).  $^{13}\text{C}$  NMR (126 MHz,  $\text{CDCl}_3$ )  $\delta$ : 157.61, 148.39, 139.87, 138.12, 137.03, 135.51, 131.74, 131.28, 130.54, 130.50, 128.54, 123.69, 122.18. HRMS calcd. For  $\text{C}_{27}\text{H}_{15}\text{BCl}_2\text{FN}_4\text{O}_4$  [M-F] $^+$ : 559.0547, found 559.0547.

**BODIPY 4e:** BODIPY **1a** (34 mg, 0.1 mmol) and diazonium salt **2e** (84 mg, 0.4 mmol) for 36h affords **4e** in 65% (26 mg) isolated yield.  $^1\text{H}$  NMR (300 MHz,  $\text{CDCl}_3$ )  $\delta$ : 7.91 (d,  $J$  = 5.0 Hz, 4H), 7.53 - 7.42 (m, 9H), 6.66 (d,  $J$  = 4.0 Hz, 2H), 6.61 (d,  $J$  = 4.0 Hz, 2H).  $^{13}\text{C}$  NMR (126 MHz,  $\text{CDCl}_3$ )  $\delta$ : 159.92, 137.29, 136.08, 135.82, 132.50, 132.12, 131.15, 129.86, 129.65, 129.16, 128.39, 128.34, 121.54. HRMS calcd. For  $\text{C}_{27}\text{H}_{17}\text{BCl}_2\text{FN}_2$  [M-F] $^+$ : 469.0846, found 469.0863.

**BODIPY 4f:** BODIPY **1a** (34 mg, 0.1 mmol) and diazonium salt **2f** (84 mg, 0.4 mmol) for 3 h affords **4f** in 58% (30 mg) isolated yield.  $^1\text{H}$  NMR (500 MHz,  $\text{CDCl}_3$ )  $\delta$ : 7.84 (d,  $J$  = 8.0 Hz, 4H), 7.50 - 7.48 (m, 2H), 7.43 - 7.39 (m, 1H), 7.24 (d,  $J$  = 7.8 Hz, 4H), 6.62 (d,  $J$  = 4.2 Hz, 2H), 6.59 (d,  $J$  = 4.0 Hz, 2H), 2.39 (s, 6H).  $^{13}\text{C}$  NMR (125 MHz,  $\text{CDCl}_3$ )  $\delta$ : 159.82, 140.12, 136.44, 135.97, 135.86, 132.24, 131.08, 129.74, 129.61, 129.21, 128.87, 128.30, 121.34, 21.66. HRMS calcd. For  $\text{C}_{29}\text{H}_{21}\text{BCl}_2\text{FN}_2$  [M-F] $^+$ : 497.1159, found 497.1159.

**BODIPY 4g:** BODIPY **1a** (34 mg, 0.1 mmol) and diazonium salt **2g** (124 mg, 0.5 mmol) for 3 h affords **4g** in 42% (25 mg) isolated yield.  $^1\text{H}$  NMR (500 MHz,  $\text{CDCl}_3$ )  $\delta$ : 7.89 (d,  $J$  = 8.4 Hz, 4H), 7.51 - 7.45 (m, 6H), 7.43 - 7.40 (m, 1H), 6.63 - 6.61 (m, 4H), 1.35 (s, 18H).  $^{13}\text{C}$  NMR (126 MHz,  $\text{CDCl}_3$ )  $\delta$ : 159.73, 153.01, 136.33, 136.04, 135.88, 132.29, 131.07, 129.66, 129.43, 128.79, 128.30, 125.49, 121.52, 34.98, 31.36. HRMS calcd. For  $\text{C}_{35}\text{H}_{33}\text{BCl}_2\text{FN}_2$  [M-F] $^+$ : 581.2098, found 581.2070.

**BODIPY 4h:** BODIPY **1a** (34 mg, 0.1 mmol) and diazonium salt **2h** (89 mg, 0.4 mmol) for 3h affords **4h** in 41% (22 mg) isolated yield.  $^1\text{H}$  NMR (500 MHz,  $\text{CDCl}_3$ )

$\delta$ : 7.93 (d,  $J$  = 7.1 Hz, 4H), 7.49 (d,  $J$  = 8.5 Hz, 2H), 7.42 - 7.39 (m, 1H), 6.97 (d,  $J$  = 8.9 Hz, 4H), 6.61-6.59 (m, 4H), 3.86 (s, 6H).  $^{13}\text{C}$  NMR (75 MHz,  $\text{CDCl}_3$ )  $\delta$ : 161.04, 159.19, 135.94, 135.48, 132.30, 131.39, 131.34, 131.01, 128.60, 128.29, 125.13, 121.06, 113.98, 55.09. HRMS calcd. For  $\text{C}_{29}\text{H}_{21}\text{BCl}_2\text{FN}_2\text{O}_2$  [M-F] $^+$ : 529.1057, found 529.1080.

**BODIPY4i:** BODIPY **1a** (34 mg, 0.1 mmol) and diazonium salt **2i** (250 mg, 1 mmol) for 24 h affords **4i** in 49% (28 mg) isolated yield.  $^1\text{H}$  NMR (500 MHz,  $\text{CDCl}_3$ )  $\delta$ : 8.43 (s, 2H), 8.05 (d,  $J$  = 8.5 Hz, 2H), 7.91-7.87 (m, 4H), 7.83 (d,  $J$  = 7.5 Hz, 2H), 7.54 - 7.47 (m, 7H), 6.75 (d,  $J$  = 4.0 Hz, 2H), 6.72 (d,  $J$  = 3.6 Hz, 2H).  $^{13}\text{C}$  NMR (126 MHz,  $\text{CDCl}_3$ )  $\delta$ : 159.84, 136.38, 135.87, 138.88, 133.06, 132.21, 131.20, 129.98, 129.89, 129.16, 128.37, 127.98, 127.78, 127.25, 126.78, 126.74, 126.43, 121.96. HRMS calcd. For  $\text{C}_{35}\text{H}_{21}\text{BCl}_2\text{FN}_2$  [M-F] $^+$ : 569.1159, found 569.1181.

**BODIPY 4j:** BODIPY **1b** (28 mg, 0.1 mmol) and diazonium salt **2c** (93 mg, 0.4 mmol) for 3 h affords **4j** in 45% (21 mg) isolated yield.  $^1\text{H}$  NMR (500 MHz,  $\text{CDCl}_3$ )  $\delta$ : 7.96 (d,  $J$  = 8.3 Hz, 4H), 7.73 (d,  $J$  = 8.3 Hz, 4H), 7.65 - 7.56 (m, 5H), 6.70 (d,  $J$  = 4.2 Hz, 2H), 6.69 (d,  $J$  = 4.3 Hz, 2H).  $^{13}\text{C}$  NMR (125 MHz,  $\text{CDCl}_3$ )  $\delta$ : 156.96, 146.46, 137.20, 136.71, 133.89, 132.18, 132.12, 130.95, 130.74, 130.12, 128.68, 121.42, 118.68, 113.24. HRMS calcd. For  $\text{C}_{29}\text{H}_{17}\text{BFN}_4$  [M-F] $^+$ : 451.1530, found 451.1533.

**BODIPY 4k:** BODIPY **1c** (31 mg, 0.1 mmol) and diazonium salt **2c** (93 mg, 0.4 mmol) for 3 h affords **4k** in 36% (18 mg) isolated yield.  $^1\text{H}$  NMR (500 MHz,  $\text{CDCl}_3$ )  $\delta$ : 7.98 (d,  $J$  = 8.5 Hz, 4H), 7.73 (d,  $J$  = 8.5 Hz, 4H), 7.00 (s, 2H), 6.75 (d,  $J$  = 4.5 Hz, 2H), 6.62 (d,  $J$  = 4.5 Hz, 2H), 2.39 (s, 3H), 2.19 (s, 6H).  $^{13}\text{C}$  NMR (126 MHz,  $\text{CDCl}_3$ )  $\delta$ : 156.87, 146.61, 139.29, 137.50, 136.68, 136.64, 132.17, 130.65, 130.08, 129.75, 128.46, 121.42, 118.70, 113.16, 21.30, 20.25. HRMS calcd. For  $\text{C}_{32}\text{H}_{23}\text{BFN}_4$  [M-F] $^+$ : 493.2000, found 493.2008.

**BODIPY 4l:** BODIPY **1d** (30 mg, 0.1 mmol) and diazonium salt **2c** (93 mg, 0.4 mmol) for 3 h affords **4l** in 28% (14 mg) isolated yield.  $^1\text{H}$  NMR (500 MHz,  $\text{CDCl}_3$ )  $\delta$ : 7.95 (d,  $J$  = 8.3 Hz, 4H), 7.72 (d,  $J$  = 8.4 Hz, 4H), 7.58 (d,  $J$  = 8.6 Hz, 2H), 7.09 (d,  $J$  = 8.6 Hz, 2H), 7.04 (d,  $J$  = 4.2 Hz, 2H), 6.69 (d,  $J$  = 4.1 Hz, 2H), 3.94 (s, 3H).  $^{13}\text{C}$  NMR (126 MHz,  $\text{CDCl}_3$ )  $\delta$ : 162.26, 156.26, 146.59, 137.08, 136.75, 132.69, 132.16, 131.95, 130.09, 126.33, 121.22, 118.59, 114.29, 113.04, 55.83. HRMS calcd. For  $\text{C}_{30}\text{H}_{19}\text{BFN}_4\text{O}$  [M-F] $^+$ : 481.1636, found 481.1631.

**BODIPY 4n:** BODIPY **1c** (31 mg, 0.1 mmol) and diazonium salt **2j** (94 mg, 0.4 mmol) for 3 h affords **4n** in 41% (23 mg) isolated yield.  $^1\text{H}$  NMR (500 MHz,  $\text{CDCl}_3$ )  $\delta$ : 8.07 (d,  $J = 8.0$  Hz, 2H), 7.63 - 7.59 (m, 4H), 7.54 - 7.50 (m, 2H), 7.00 (s, 2H), 6.73 (d,  $J = 4.1$  Hz, 2H), 6.37 (d,  $J = 4.1$  Hz, 2H), 2.39 (s, 3H), 2.24 (s, 6H).  $^{13}\text{C}$  NMR (125 MHz,  $\text{CDCl}_3$ )  $\delta$ : 154.12, 148.31, 146.61, 139.02, 136.84, 136.08, 132.81, 132.23, 130.24, 129.89, 128.34, 127.96, 124.55, 120.22, 21.32, 20.27. HRMS calcd. For  $\text{C}_{30}\text{H}_{23}\text{BFN}_4\text{O}_4$   $[\text{M-F}]^+$ : 533.1796, found 533.1795.

**BODIPY 4o:** BODIPY **1f** (21 mg, 0.1 mmol) and diazonium salt **2a** (90 mg, 0.4 mmol) for 3 h affords **4o** in 51% (22 mg) isolated yield.  $^1\text{H}$  NMR (400 MHz,  $\text{CDCl}_3$ )  $\delta$ : 7.79 - 7.74 (m, 4H), 7.41 - 7.36 (m, 4H), 7.33 (d,  $J = 4.2$  Hz, 2H), 6.61 (d,  $J = 4.1$  Hz, 2H), 2.66 (s, 3H).  $^{13}\text{C}$  NMR (101 MHz,  $\text{CDCl}_3$ )  $\delta$ : 157.19, 142.55, 137.01, 135.96, 131.19, 130.95, 130.91, 130.87, 128.78, 127.88, 120.51, 16.27. HRMS  $\text{C}_{22}\text{H}_{16}\text{BCl}_2\text{F}_2\text{N}_2$   $[\text{M+H}]^+$ : 427.0752, found 427.07405.

#### Indole-Fused BODIPY 5a:

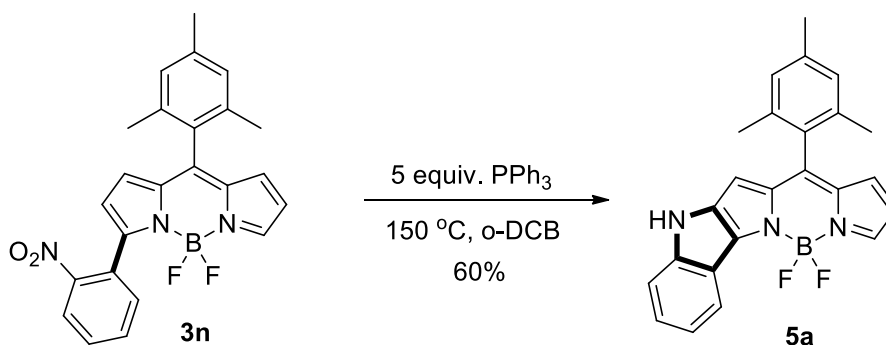

**BODIPY 5a:** In the experimental procedure in the reference. BODIPY **3n** (0.15 mmol, 65 mg),  $\text{PPh}_3$  (0.75 mmol, 197 mg), 2.0 mL ortho-dichlorobenzene (o-DCB) were added as solvent in a 10 mL Schlenk reaction tube, and heated at 150  $^\circ\text{C}$  under argon gas protection for 24 h, **5a** was isolated with 60% (36 mg).  $^1\text{H}$  NMR (500 MHz,  $\text{CDCl}_3$ )  $\delta$ : 8.18 (d,  $J = 7.8$  Hz, 1H), 7.75 (s, 1H), 7.36 - 7.32 (m, 2H), 7.13 - 7.10 (m, 2H), 6.95 (s, 2H), 6.44 (d,  $J = 3.4$  Hz, 1H), 6.36 (d,  $J = 1.8$  Hz, 1H), 5.95 (brs, 1H), 2.37 (s, 3H), 2.13 (s, 6H).  $^{13}\text{C}$  NMR (126 MHz,  $\text{CDCl}_3$ )  $\delta$ : 150.76, 150.33, 144.12, 140.56, 140.06, 139.80, 138.58, 136.89, 135.36, 130.98, 130.49, 128.18, 126.24, 125.08, 121.18, 116.66, 114.63, 114.60, 112.22, 103.77, 21.27, 20.15. HRMS calcd. For  $\text{C}_{24}\text{H}_{20}\text{BFN}_3$   $[\text{M-F}]^+$ : 380.1734, found 380.1726.

#### Indole-Fused BODIPY 5b:

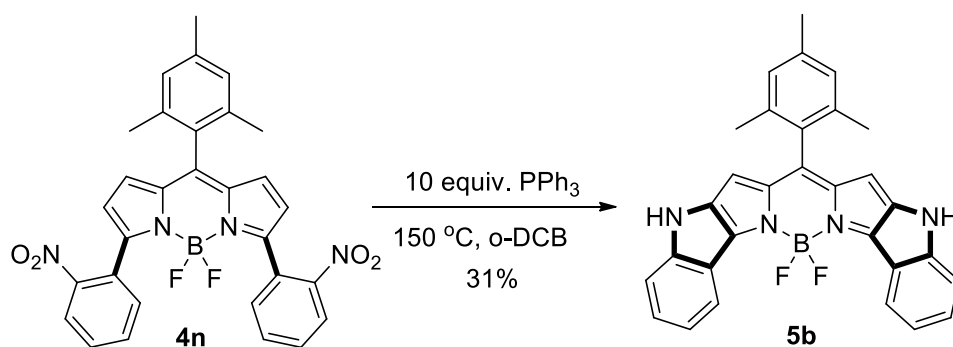

**BODIPY 5b:** BODIPY **4n** (0.1 mmol, 55 mg), PPh<sub>3</sub> (1.0 mmol, 262 mg), 2.0 mL o-DCB were added as solvent in a 10 mL Schlenk reaction tube, and heated at 150 °C under argon gas protection for 36 h, **5b** was isolated with 31% (15 mg). <sup>1</sup>H NMR (500 MHz, *d*<sub>6</sub>-DMSO) δ: 10.59 (s, 2H), 7.99 (d, *J* = 7.6 Hz, 2H), 7.38 - 7.35 (m, 2H), 7.30 (d, *J* = 8.2 Hz, 2H), 7.12 (t, *J* = 7.5 Hz, 2H), 7.07 (s, 2H), 5.93 (s, 2H), 2.34 (s, 3H), 2.15 (s, 6H). <sup>13</sup>C NMR (126 MHz, DMSO) δ: 149.09, 145.56, 141.07, 139.73, 139.34, 137.92, 136.20, 130.28, 129.09, 128.01, 122.71, 119.66, 113.56, 112.64, 101.74, 20.7, 19.69. HRMS calcd. For C<sub>30</sub>H<sub>23</sub>BFN<sub>4</sub> [M-F]<sup>+</sup>: 469.2000, found 469.1992.

## 4. Crystal data

**Table S1. Selected Geometrical Parameters of 3n, 4b and 5a obtained from crystallography**

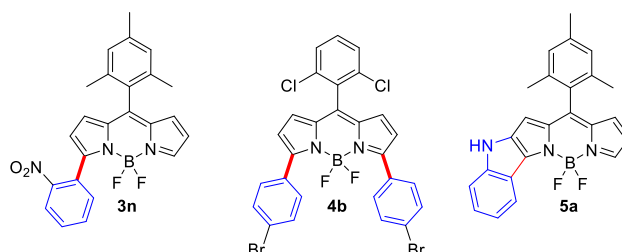

|                                                                                                                                              | <b>3n</b>   | <b>4b</b>    | <b>5a</b>    |
|----------------------------------------------------------------------------------------------------------------------------------------------|-------------|--------------|--------------|
| B-N bond length (Å)                                                                                                                          | 1.5459 (26) | 1.5596 (63)  | 1.5166 (41)  |
|                                                                                                                                              | 1.5581 (26) | 1.5643 (62)  | 1.5354 (40)  |
| dihedral angles between <i>meso</i> -mesityl group and dipyrrolic core (deg)                                                                 | 83.919 (42) | 82.906 (145) | 86.766 (72)  |
| dihedral angles of two pyrrole rings in dipyrrolic core (deg)                                                                                | 5.936 (53)  | 5.169 (136)  | 10.658 (122) |
| dihedral angles between $\alpha$ -aryl group and dipyrrolic core (deg)                                                                       | 58.937 (62) | 36.828 (169) | 4.038 (77)   |
|                                                                                                                                              | /           | 41.219 (169) | /            |
| the average and maximum deviations of the eleven atoms from the mean plane of dipyrrolic (C <sub>9</sub> N <sub>2</sub> ) core and indole(Å) | /           | /            | 0.113/0.2838 |
| the interplanar distance of two adjacent molecules(Å)                                                                                        | 6.1417      | 2.1049       | 5.6697       |

**Table S2. Crystal experimental details.**

|                                                                            | <b>3n</b>                                                                     | <b>4b</b>                                                                                         | <b>5a</b>                                                      |
|----------------------------------------------------------------------------|-------------------------------------------------------------------------------|---------------------------------------------------------------------------------------------------|----------------------------------------------------------------|
| Crystal data                                                               |                                                                               |                                                                                                   |                                                                |
| Chemical formula                                                           | C <sub>24</sub> H <sub>20</sub> BF <sub>2</sub> N <sub>2</sub> O <sub>3</sub> | C <sub>27</sub> H <sub>15</sub> BBr <sub>2</sub> Cl <sub>2</sub> F <sub>2</sub><br>N <sub>2</sub> | C <sub>24</sub> H <sub>20</sub> BF <sub>2</sub> N <sub>3</sub> |
| $M_r$                                                                      | 431.24                                                                        | 646.94                                                                                            | 339.27                                                         |
| Crystal system, space group                                                | Monoclinic, $P2_1/c$                                                          | Monoclinic, $P2_1/c$                                                                              | Orthorhombic, $P2_12_12_1$                                     |
| Temperature (K)                                                            | 300(2)                                                                        | 300(2)                                                                                            | 298.15                                                         |
| $a, b, c$ (Å)                                                              | 12.9718(5),<br>14.7930(6),<br>12.7375(18)                                     | 12.998(2),<br>11.2288(14),<br>18.281(3)                                                           | 10.0602(6),<br>11.9480(8),<br>17.5342(11)                      |
| $\alpha, \beta, \gamma$ (°)                                                | 90, 117.8580(10),<br>90                                                       | 90, 104.899(5), 90                                                                                | 90, 90, 90                                                     |
| $V$ (Å <sup>3</sup> )                                                      | 2160.96(14)                                                                   | 2578.4(6)                                                                                         | 2107.6(2)                                                      |
| $Z$                                                                        | 4                                                                             | 4                                                                                                 | 4                                                              |
| $D_{calc}$ (Mg·m <sup>-3</sup> )                                           | 1.326                                                                         | 1.667                                                                                             | 1.258                                                          |
| Radiation type                                                             | Mo $K\alpha$                                                                  | Mo $K\alpha$                                                                                      | Mo $K\alpha$                                                   |
| $\mu$ (mm <sup>-1</sup> )                                                  | 0.097                                                                         | 3.386                                                                                             | 0.087                                                          |
| Crystal size (mm)                                                          | 0.20 × 0.21 × 0.20                                                            | 0.21 × 0.21 × 0.2                                                                                 | 0.22 × 0.21 × 0.21                                             |
| Diffractometer                                                             | Bruker APEX-II<br>CCD                                                         | Bruker APEX-II<br>CCD                                                                             | Bruker APEX-II<br>CCD                                          |
| Absorption coefficient (mm <sup>-1</sup> )                                 | 0.097                                                                         | 3.386                                                                                             | 0.087                                                          |
| No. of measured, independent and observed [ $I > 2\sigma(I)$ ] reflections | 42127, 4966, 3824                                                             | 66241, 5909, 3916                                                                                 | 52266, 4827, 3428                                              |
| $R_{int}$                                                                  | 0.0725                                                                        | 0.1528                                                                                            | 0.0632                                                         |
| $\theta_{max}$ [°]                                                         | 27.528                                                                        | 27.495                                                                                            | 27.57                                                          |
| $\theta_{min}$ [°]                                                         | 3.277                                                                         | 2.866                                                                                             | 2.88                                                           |
| $R_1$ [ $I \geq \sigma(I)$ ]                                               | 0.0528                                                                        | 0.0947                                                                                            | 0.0599                                                         |
| wR <sub>2</sub>                                                            | 0.1534                                                                        | 0.2282                                                                                            | 0.1525                                                         |
| No. of reflections                                                         | 3824                                                                          | 3916                                                                                              | 5041                                                           |
| No. of parameters                                                          | 292                                                                           | 325                                                                                               | 281                                                            |
| Wavelength                                                                 | 0.71073                                                                       | 0.710760                                                                                          | 0.71073                                                        |
| Largest diff. peak/hole (eÅ <sup>-3</sup> )                                | 0.254, -0.241                                                                 | 0.883, -0.728                                                                                     | 0.1756, -0.1693                                                |
| Parameter                                                                  | 292                                                                           | 325                                                                                               | 274                                                            |



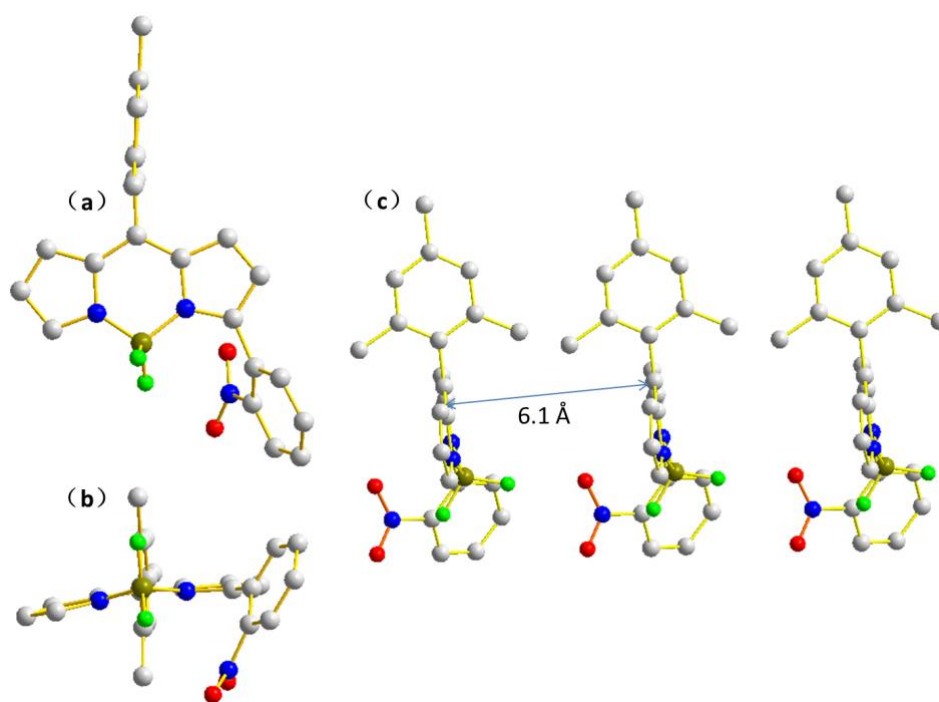

**Figure S4.** Top (a) and front (b) views of X-Ray structures of BODIPY **3n**, and Crystal packing (c). C, light gray; N, blue; B, dark yellow; F, bright green; O, red. Hydrogen atoms have removed for clarity.

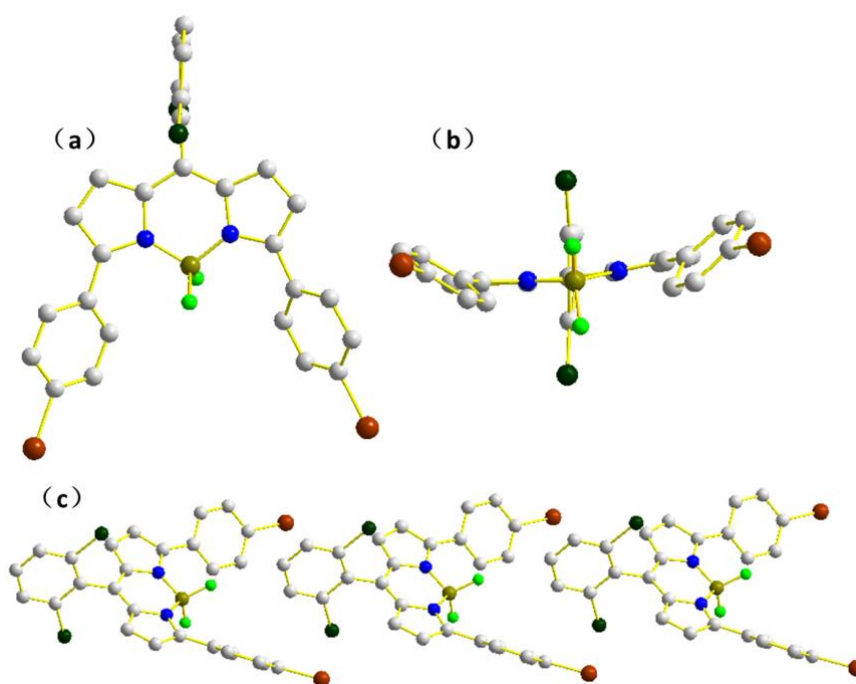

**Figure S5.** Top (a) and front (b) views of X-Ray structures of BODIPY **4b**, and Crystal packing (c). C, light gray; N, blue; B, dark yellow; F, bright green; O, red; Cl, dark green; Br, Green. Hydrogen atoms have removed for clarity.

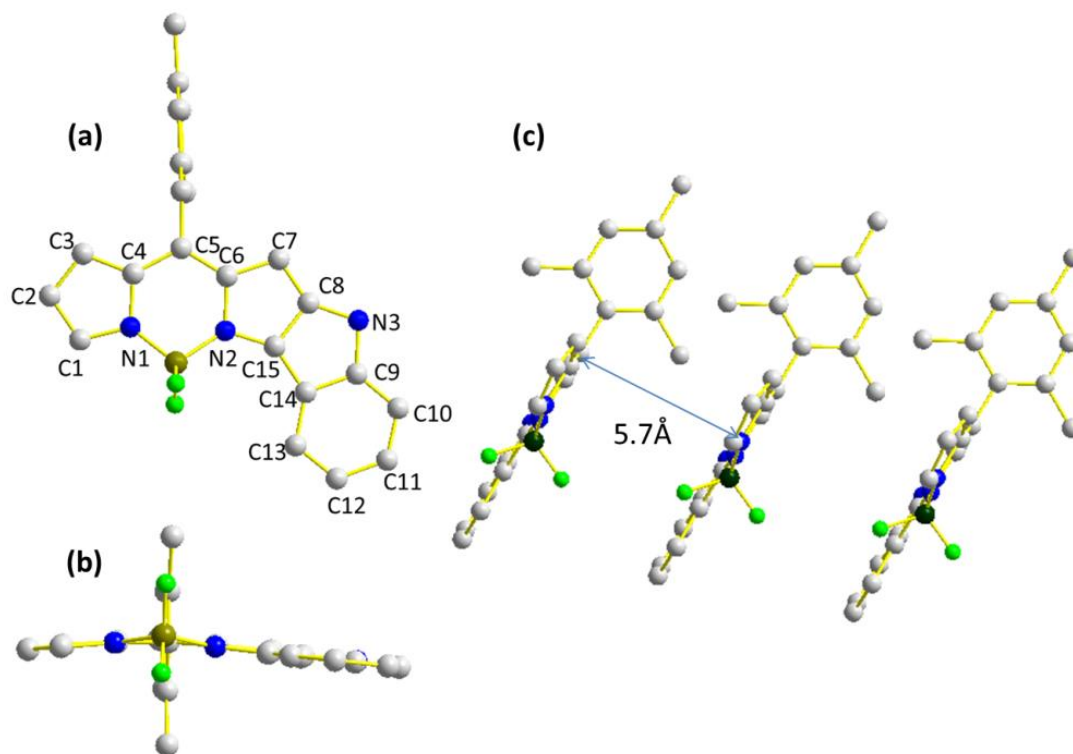

**Figure S6.** Top (a) and front (b) views of X-Ray structures of BODIPY **5a**, and Crystal packing (c). C, light gray; N, blue; B, dark yellow; F, bright green. Hydrogen atoms have removed for clarity.

## 5. Mechanism studies

### 5.1 Stern-Volmer emission quenching

Steady-state emission spectra were recorded using Edinburgh FS5 spectrometers. To a degassed acetonitrile solution of BODIPY **1a** ( $9 \times 10^{-6}$  M) was added various amount of 4-chlorophenyl diazonium salt **2a**. The emission spectra of **1a** was then collected under excitation at 480 nm as shown in Figure S7a.

The emission intensity of **1a** at 526 nm was used to determine the Stern-Volmer quenching values (Figure S7b). The Stern-Volmer plot, as shown in Figure S5b, shows a linear correlation between the amounts of **2a** and the ratio  $I_0/I$ .<sup>7,8</sup>

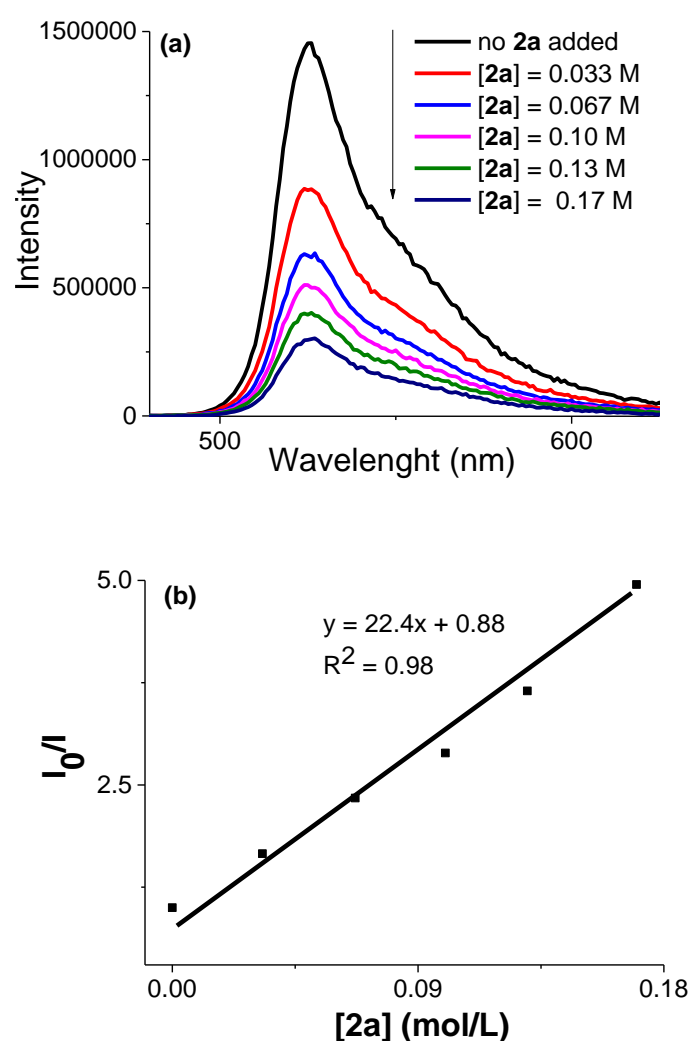

**Figure S7.** (a) The emission spectra of BODIPY **1a** ( $9 \times 10^{-6}$  M) in acetonitrile at 25 °C with increasing amounts of 4-chlorophenyl diazonium salt **2a** (0 – 0.17 M) under excitation at 480 nm. (b) The Stern–Volmer plot of **1a** vs. [2a].

## 5.2 The influence of TEMPO to radical arylation reaction

When the radical scavenger TEMPO were added into the standard reaction between the aryl diazonium salt **2a** and BODIPY **1a**, the reaction was significantly inhibited. As shown in Scheme S1a, 4.0 equiv of TEMPO (62 mg, 0.4 mmol) were combined with the diazonium salt **2a** (90 mg, 0.4 mmol) in 2.0 mL acetone, followed by addition of BODIPY **1a** (34 mg, 0.1 mmol) under standard diarylation reaction condition, this reaction only gave **3a** in 20% yield with no formation of diarylated **4a**. Increasing the amount of TEMPO to 8 equiv (Scheme S1b), no desired arylated BODIPYs were detected and most of BODIPY **1a** was recovered.

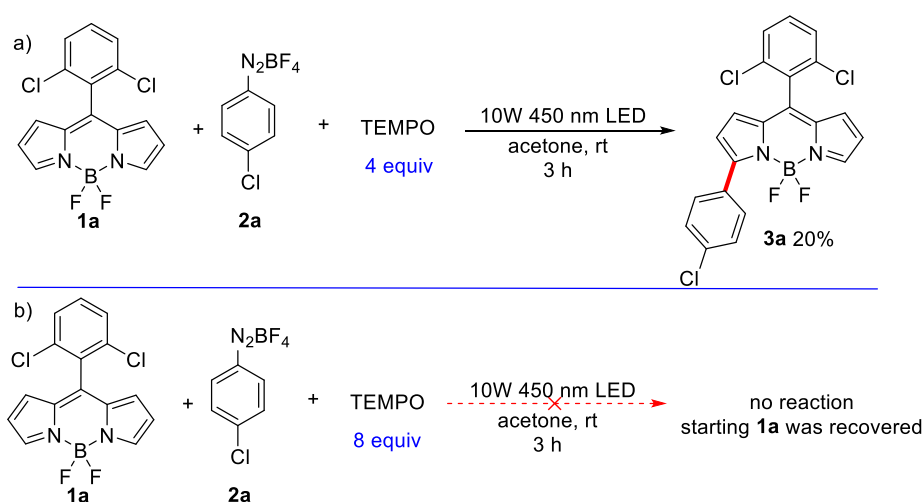

**Scheme S1.** The influence of TEMPO to this radical arylation reaction

## 5.3 Synthesis of **4a** under Ar

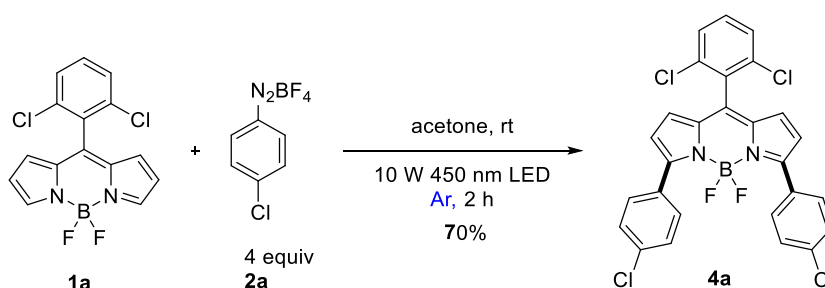

**Scheme S2.** Synthesis of **4a** under Ar

The reaction between **1a** and **2a** under Ar was studied (Scheme S1). This reaction gave similar result to the standard reaction under air, indicating that O<sub>2</sub> is not involved in this arylation reaction.

## 6. Photophysical data

**Table S3. Photophysical properties of BODIPYs 3 and 4 at room temperature in dichloromethane**

| dyes                  | $\lambda_{\text{abs}}^{\text{max}}(\text{nm})$ | $\lambda_{\text{em}}^{\text{max}}(\text{nm})$ | $\varepsilon (\text{cm}^{-1}\text{M}^{-1})$ | $\Phi^{\text{a}}$ | Stokes-shift ( $\text{cm}^{-1}$ ) |
|-----------------------|------------------------------------------------|-----------------------------------------------|---------------------------------------------|-------------------|-----------------------------------|
| <b>1c<sup>b</sup></b> | 500                                            | 515                                           | 77300                                       | 0.99              | 480                               |
| <b>3a</b>             | 544                                            | 567                                           | 51400                                       | 0.66              | 750                               |
| <b>3b</b>             | 544                                            | 568                                           | 59170                                       | 0.99              | 764                               |
| <b>3c</b>             | 543                                            | 567                                           | 56200                                       | 0.67              | 800                               |
| <b>3d</b>             | 546                                            | 570                                           | 50883                                       | 0.71              | 770                               |
| <b>3e</b>             | 540                                            | 565                                           | 52600                                       | 0.68              | 820                               |
| <b>3f</b>             | 546                                            | 567                                           | 47864                                       | 0.72              | 650                               |
| <b>3g</b>             | 547                                            | 566                                           | 50403                                       | 0.67              | 630                               |
| <b>3h</b>             | 557                                            | 584                                           | 74300                                       | 0.53              | 850                               |
| <b>3i</b>             | 553                                            | 582                                           | 67100                                       | 0.56              | 920                               |
| <b>3j</b>             | 529                                            | 555                                           | 55200                                       | 0.08              | 890                               |
| <b>3k</b>             | 529                                            | 555                                           | 72800                                       | 0.77              | 890                               |
| <b>3l</b>             | 527                                            | 548                                           | 45751                                       | 0.21              | 770                               |
| <b>3m</b>             | 523                                            | 551                                           | 57200                                       | 0.82              | 990                               |
| <b>3n</b>             | 511                                            | 526                                           | 80500                                       | 0.01              | 560                               |
| <b>3o</b>             | 522                                            | 544                                           | 67000                                       | 0.87              | 775                               |
| <b>4a</b>             | 575                                            | 613                                           | 59100                                       | 0.99              | 1120                              |
| <b>4b</b>             | 575                                            | 610                                           | 49878                                       | 0.99              | 1000                              |
| <b>4c</b>             | 569                                            | 611                                           | 42200                                       | 0.99              | 1210                              |
| <b>4d</b>             | 578                                            | 619                                           | 43451                                       | 0.99              | 1180                              |
| <b>4e</b>             | 568                                            | 604                                           | 48800                                       | 0.99              | 1050                              |
| <b>4f</b>             | 577                                            | 613                                           | 47622                                       | 0.86              | 1010                              |
| <b>4g</b>             | 580                                            | 615                                           | 46154                                       | 0.81              | 990                               |
| <b>4h</b>             | 596                                            | 637                                           | 73500                                       | 0.85              | 1080                              |
| <b>4i</b>             | 590                                            | 633                                           | 51900                                       | 0.84              | 1170                              |
| <b>4j</b>             | 557                                            | 597                                           | 58100                                       | 0.99              | 1200                              |
| <b>4k</b>             | 559                                            | 595                                           | 49696                                       | 0.99              | 1100                              |

|                      |     |     |        |        |      |
|----------------------|-----|-----|--------|--------|------|
| <b>4l</b>            | 552 | 590 | 34091  | 0.99   | 1190 |
| <b>4n</b>            | 523 | 554 | 82400  | < 0.01 | 1090 |
| <b>4o</b>            | 548 | 586 | 56400  | 0.89   | 1180 |
| <b>5a</b>            | 596 | 628 | 31100  | 0.17   | 860  |
| <b>5b</b>            | 680 | 698 | 59850  | 0.31   | 380  |
| <b>6<sup>c</sup></b> | 607 | 622 | 145500 | 0.71   | 394  |

<sup>a</sup> The fluorescence quantum yields of **4a-l** and **5a** were calculated using Cresyl Violet perchlorate ( $\phi = 0.54$  in methanol) as the reference. The fluorescence quantum yields of **3a-n** were calculated using Rhodamine B ( $\phi = 0.49$  in ethanol) as the reference. The fluorescence quantum yields of **5b** were calculated using 1, 7-diphenyl-3, 5-di(4-methoxyphenyl) -azadipyrromethene ( $\phi = 0.36$  in chloroform) as the reference. The standard errors are less than 10%.<sup>b</sup> Data from ref 9. <sup>c</sup> Data from ref 10

**7. Absorption and emission spectra of all BODIPYs recorded in dichloromethane at room temperature**

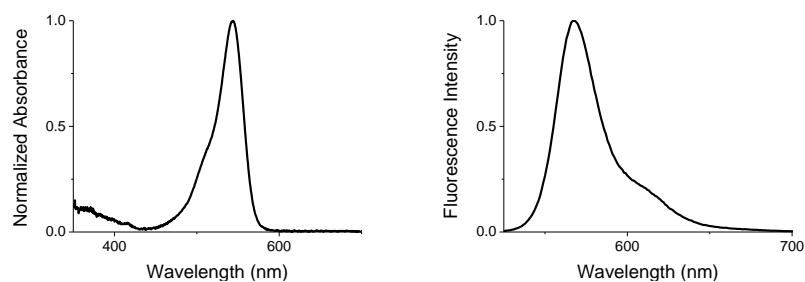

**Figure S8:** Absorption (left) and emission (right) spectra of compound **3a** recorded in dichloromethane (Excited at 520 nm)

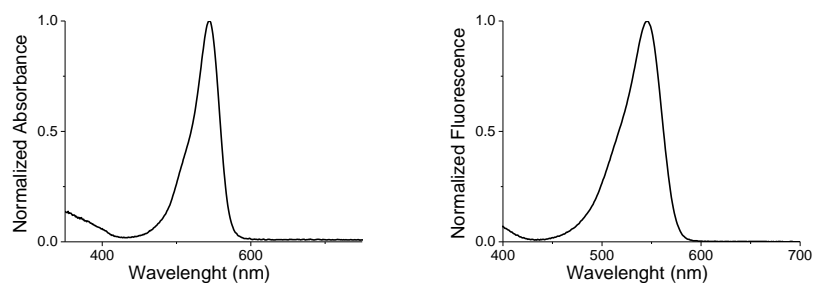

**Figure S9:** Absorption (left) and emission (right) spectra of compound **3b** recorded in dichloromethane (Excited at 510 nm)

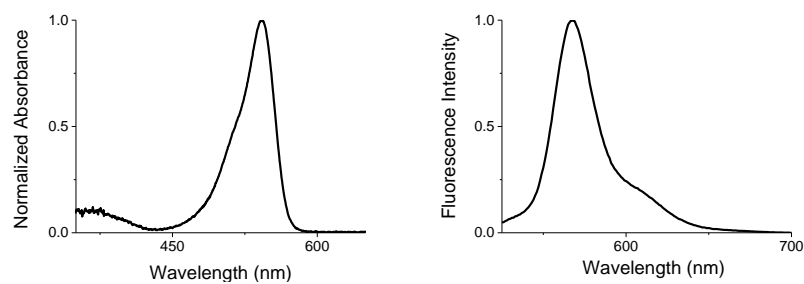

**Figure S10:** Absorption (left) and emission (right) spectra of compound **3c** recorded in dichloromethane (Excited at 520 nm).

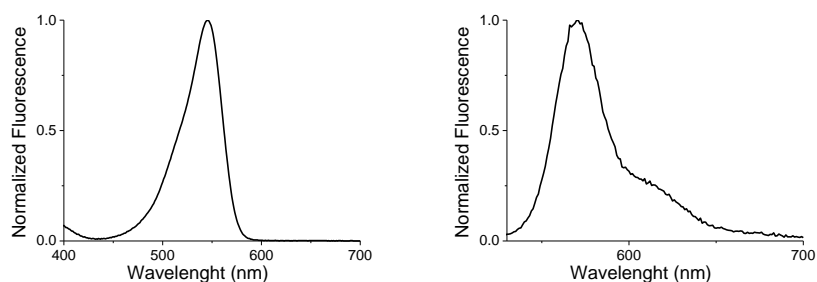

**Figure S11:** Absorption (left) and emission (right) spectra of compound **3d** recorded in dichloromethane (Excited at 510 nm)

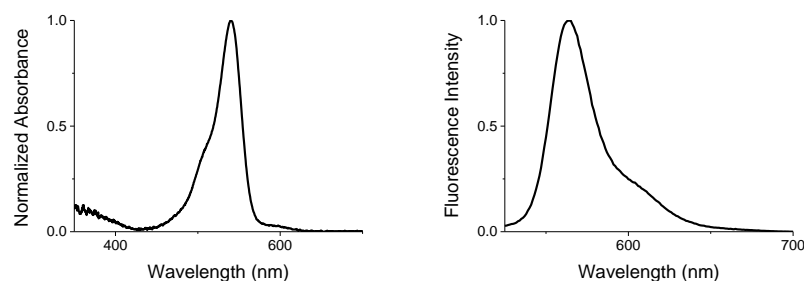

**Figure S12:** Absorption (left) and emission (right) spectra of compound **3e** recorded in dichloromethane (Excited at 520 nm)

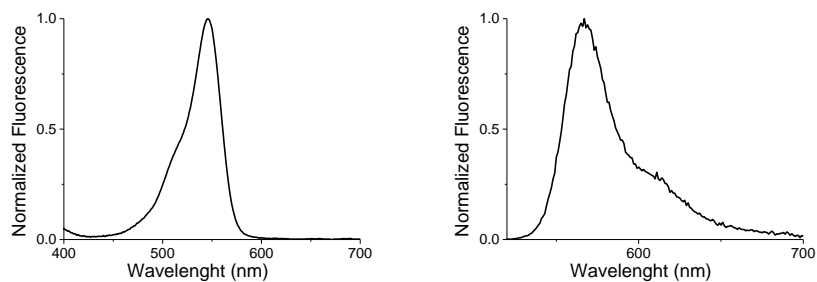

**Figure S13:** Absorption (left) and emission (right) spectra of compound **3f** recorded in dichloromethane (Excited at 510 nm)



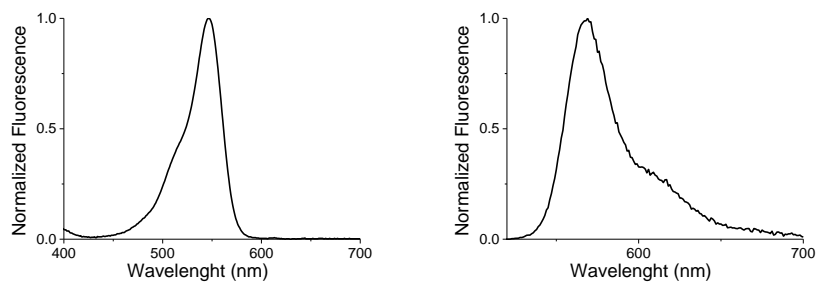

**Figure S14:** Absorption (left) and emission (right) spectra of compound **3g** recorded in dichloromethane (Excited at 510 nm)

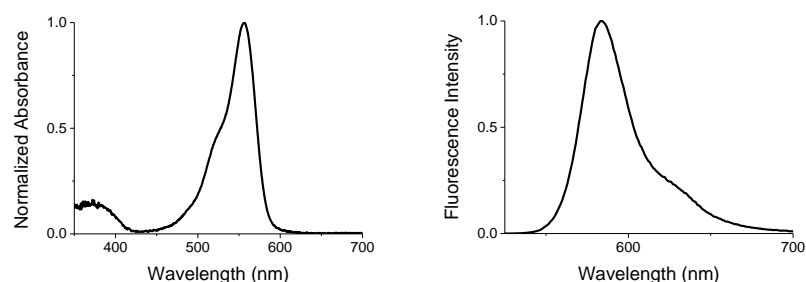

**Figure S15:** Absorption (left) and emission (right) spectra of compound **3h** recorded in dichloromethane (Excited at 520 nm)

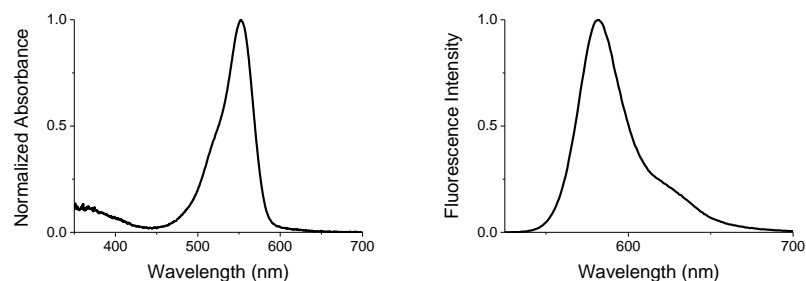

**Figure S16:** Absorption (left) and emission (right) spectra of compound **3i** recorded in dichloromethane (Excited at 520 nm)

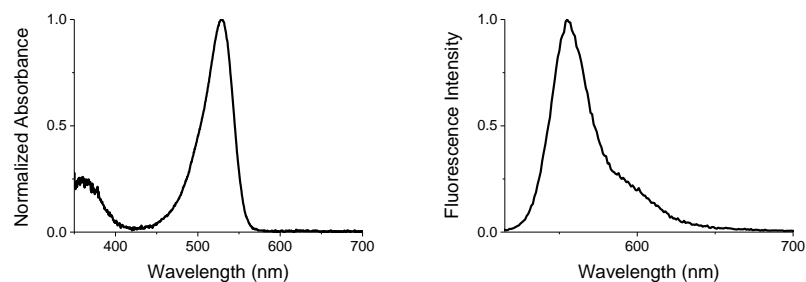

**Figure S17:** Absorption (left) and emission (right) spectra of compound **3j** recorded in dichloromethane (Excited at 500 nm)

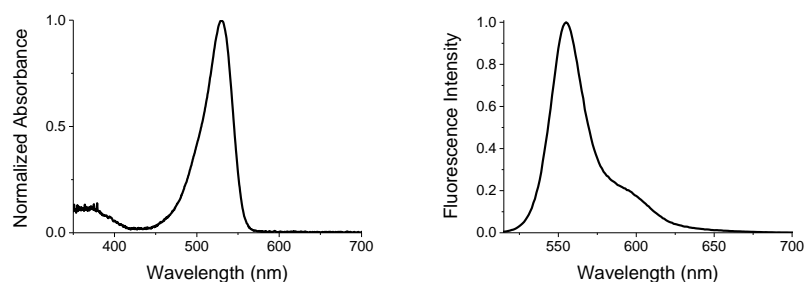

**Figure S18:** Absorption (left) and emission (right) spectra of compound **3k** recorded in dichloromethane (Excited at 510 nm)

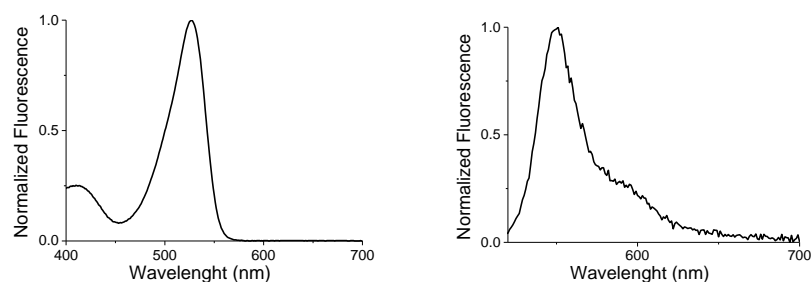

**Figure S19:** Absorption (left) and emission (right) spectra of compound **3l** recorded in dichloromethane (Excited at 510 nm)

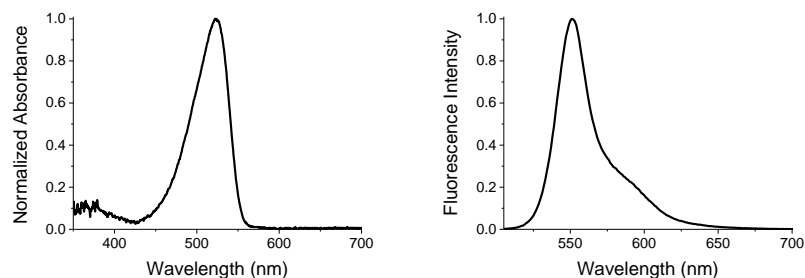

**Figure S20:** Absorption (left) and emission (right) spectra of compound **3m** recorded in dichloromethane (Excited at 500 nm)

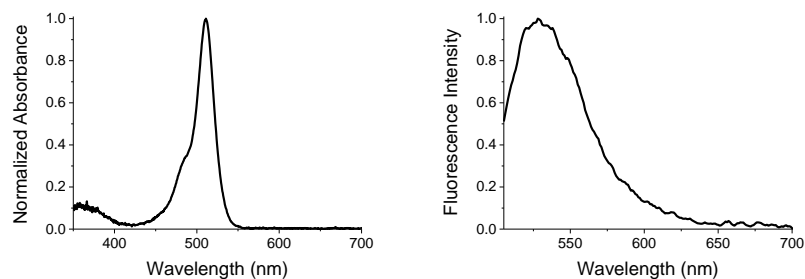

**Figure S21:** Absorption (left) and emission (right) spectra of compound **3n** recorded in dichloromethane (Excited at 500 nm)

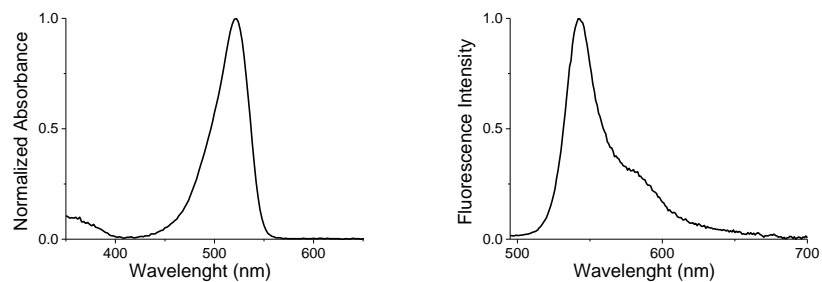

**Figure S22:** Absorption (left) and emission (right) spectra of compound **3o** recorded in dichloromethane (Excited at 490 nm)

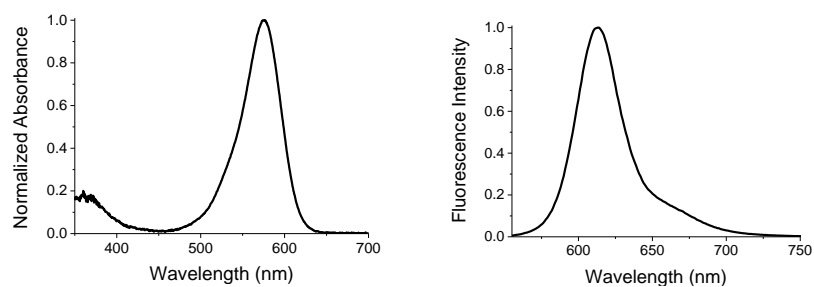

**Figure S23:** Absorption (left) and emission (right) spectra of compound **4a** recorded in dichloromethane (Excited at 550 nm)

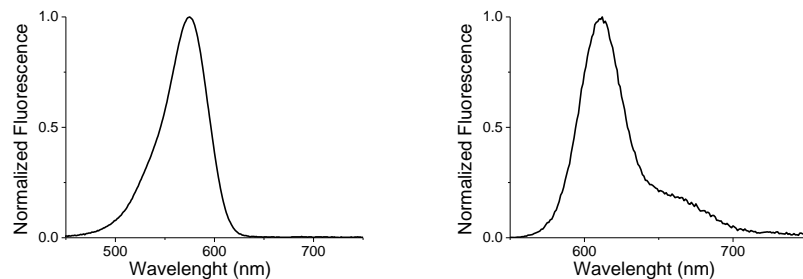

**Figure S24:** Absorption (left) and emission (right) spectra of compound **4b** recorded in dichloromethane (Excited at 540 nm)

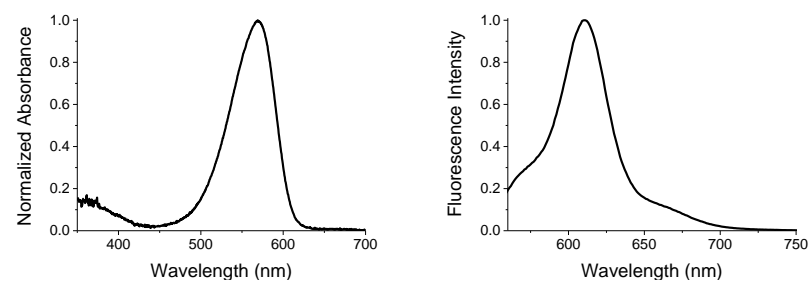

**Figure S25:** Absorption (left) and emission (right) spectra of compound **4c** recorded in dichloromethane (Excited at 550 nm)

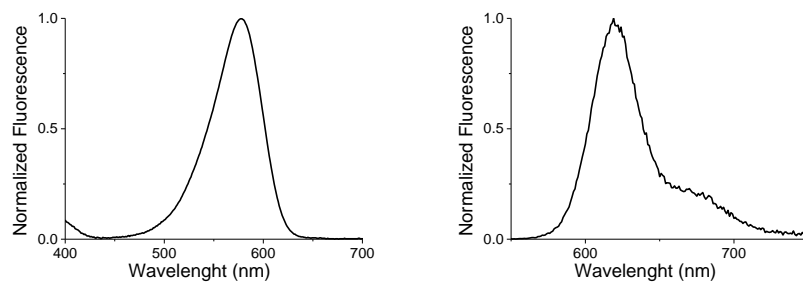

**Figure S26:** Absorption (left) and emission (right) spectra of compound **4d** recorded in dichloromethane (Excited at 540 nm)

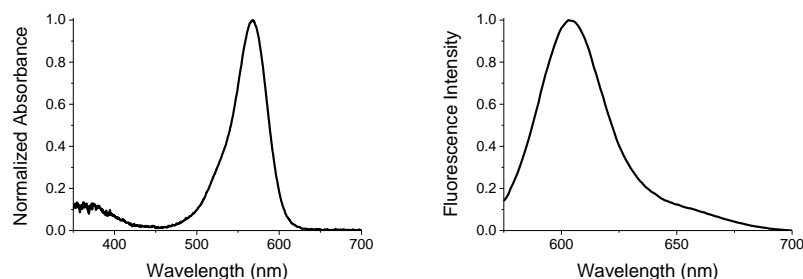

**Figure S27:** Absorption (left) and emission (right) spectra of compound **4e** recorded in dichloromethane (Excited at 550 nm)

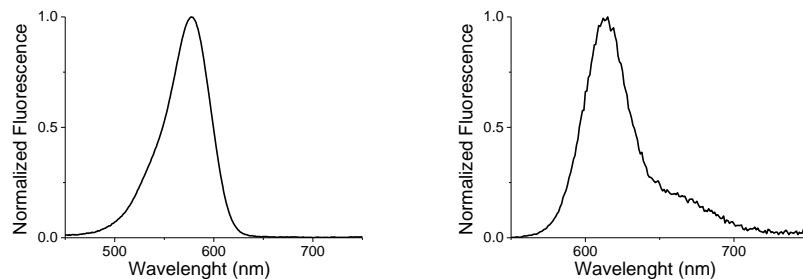

**Figure S28:** Absorption (left) and emission (right) spectra of compound **4f** recorded in dichloromethane (Excited at 540 nm)

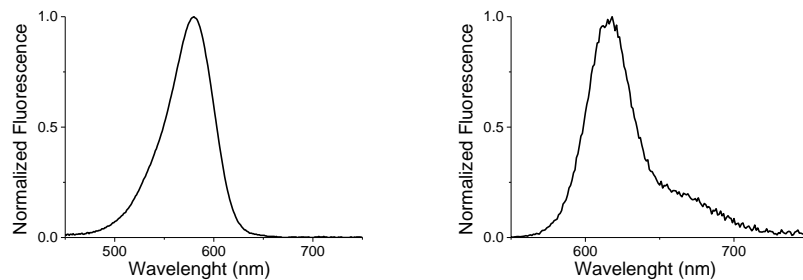

**Figure S29:** Absorption (left) and emission (right) spectra of compound **4g** recorded in dichloromethane (Excited at 540 nm)

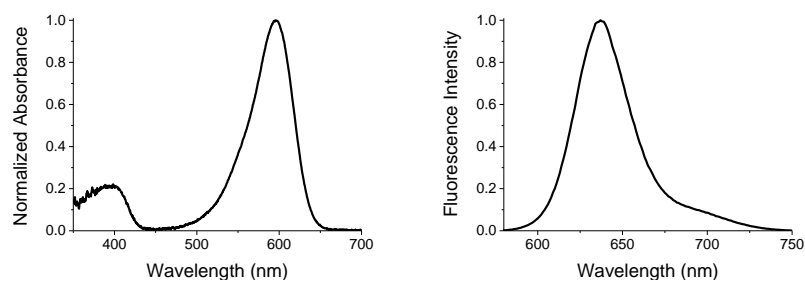

**Figure S30:** Absorption (left) and emission (right) spectra of compound **4h** recorded in dichloromethane (Excited at 570 nm)

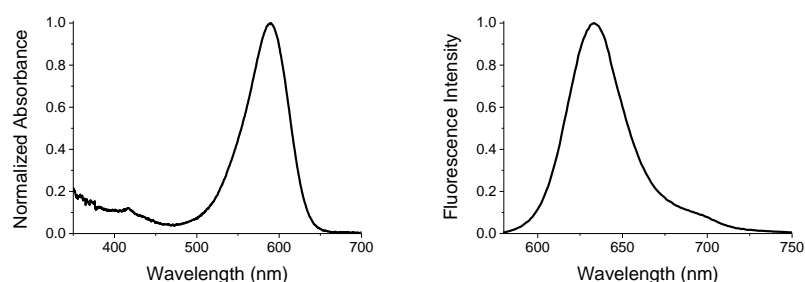

**Figure S31:** Absorption (left) and emission (right) spectra of compound **4i** recorded in dichloromethane (Excited at 570 nm)

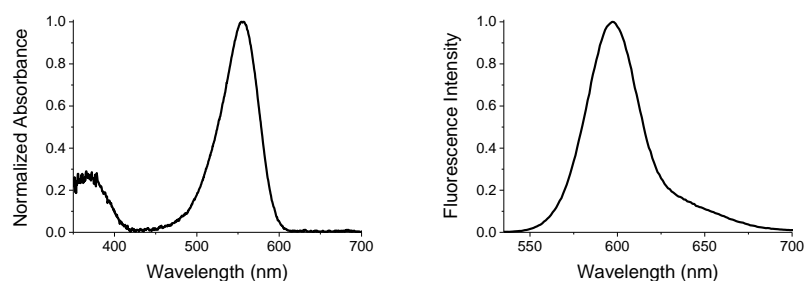

**Figure S32:** Absorption (left) and emission (right) spectra of compound **4j** recorded in dichloromethane (Excited at 530 nm)

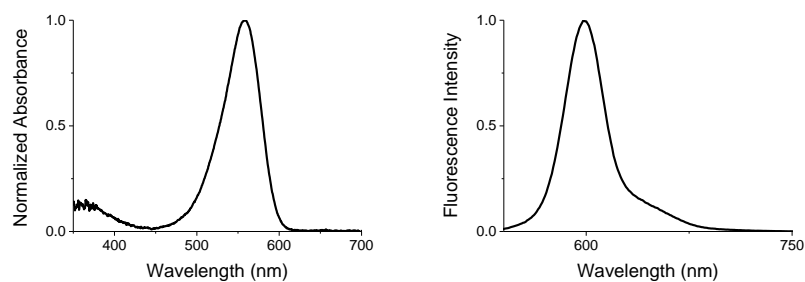

**Figure S33:** Absorption (left) and emission (right) spectra of compound **4k** recorded in dichloromethane (Excited at 530 nm)

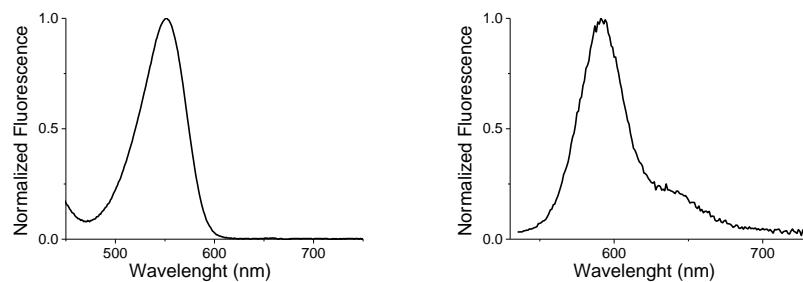

**Figure S34:** Absorption (left) and emission (right) spectra of compound **4l** recorded in dichloromethane (Excited at 530 nm)

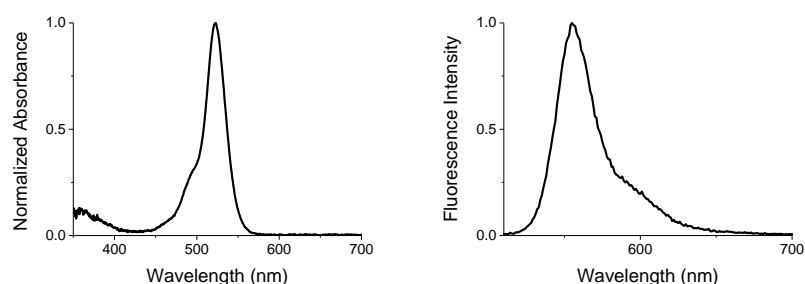

**Figure S35:** Absorption (left) and emission (right) spectra of compound **4n** recorded in dichloromethane (Excited at 500 nm)

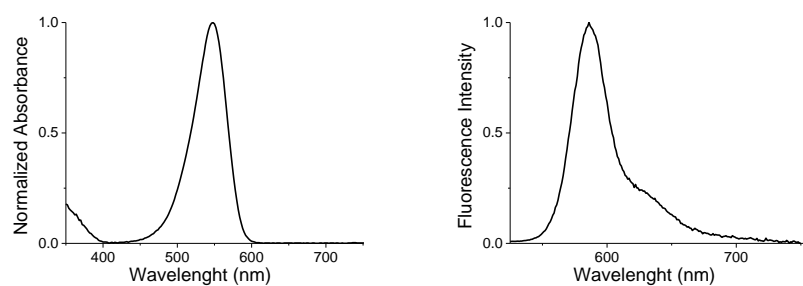

**Figure S36:** Absorption (left) and emission (right) spectra of compound **4o** recorded in dichloromethane (Excited at 520 nm)

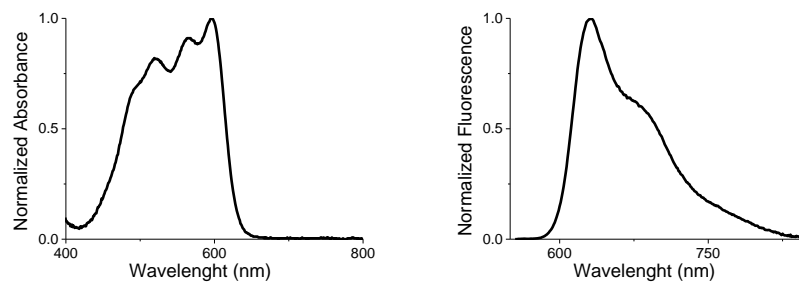

**Figure S37:** Absorption (left) and emission (right) spectra of compound **5a** recorded in dichloromethane (Excited at 550 nm)

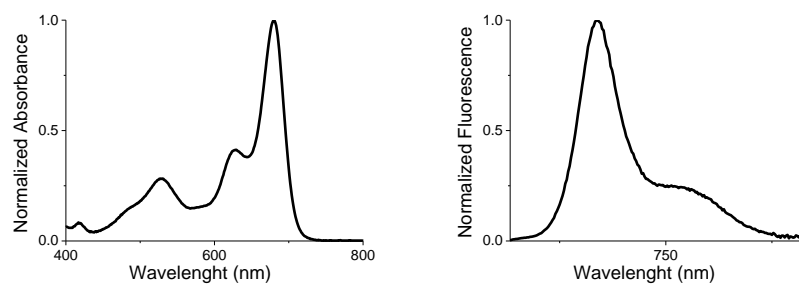

**Figure S38:** Absorption (left) and emission (right) spectra of compound **5b** recorded in dichloromethane (Excited at 635 nm)

## 8. Cellular studies

### Cell Culture

The HeLa cells were cultured in a Roswell Park Memorial Institute 1640 medium (RPMI-1640, Gibco, America) with 10% fetal bovine serum (FBS, Lonsera, Shanghai, China) at 37 °C with 5% CO<sub>2</sub>.

### Cytotoxicity Determined by the CCK-8 Method

The HeLa cells were plated at 5000 cells per well in a 96-well plate in a 1640 medium and allowed to grow for 24 h. A gradient concentration of **5b** from 1 to 100 μM in a fresh medium was added as a replacement, and the cells were incubated for 24 h at 37 °C with 5% CO<sub>2</sub>. The working solutions were then removed, and the cells were washed with PBS buffer two times. A total of 10 μL of CCK-8 (Cell Counting Kit-8, BIOMIKY) was added into each well, and the cells were further incubated at 37 °C for 1 h in a 10% CO<sub>2</sub> humidified atmosphere. The plate was then shaken for 5 min, and the absorbance was measured at 450 nm using a microplate reader.

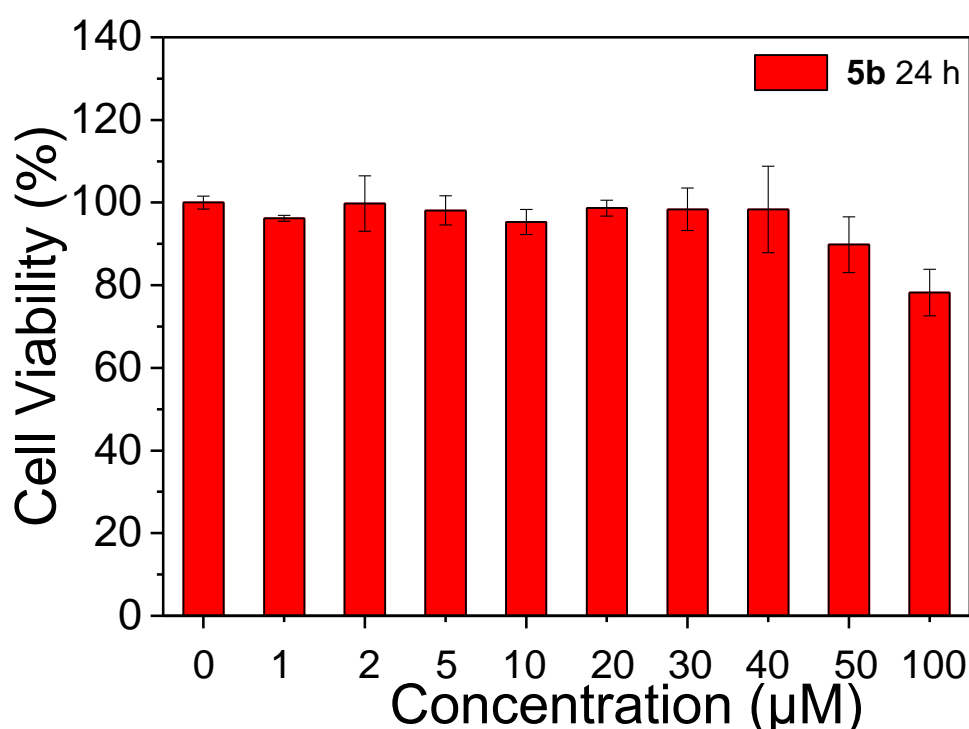

**Figure S39.** Viability of HeLa cells treated with 0, 1, 2, 5, 10, 20, 30, 40, 50 and 100 μM **5b** for 24 h.



### Cell Incubation and Imaging

A total of 30000 HeLa cells were seeded into a glass bottom dish with the same procedure above. A solution of **5b** solution in RPMI-1640 medium (containing 1% DMSO, 5  $\mu$ M) was added to the above cells and incubated for another 15 min at 37 °C with 5% CO<sub>2</sub>. The working solutions were then removed, and the cells were then washed with PBS two times and fixed by 4% formaldehyde for 20 min. The organelle tracer DAPI (1.67  $\mu$ g/mL) was added subsequently and incubated for 20 min to stain the nucleus. The above solution in dish was removed, and the cells were washed with PBS buffer two times before imaging using a confocal fluorescence microscope (Leica Microsystems SP8 MP).

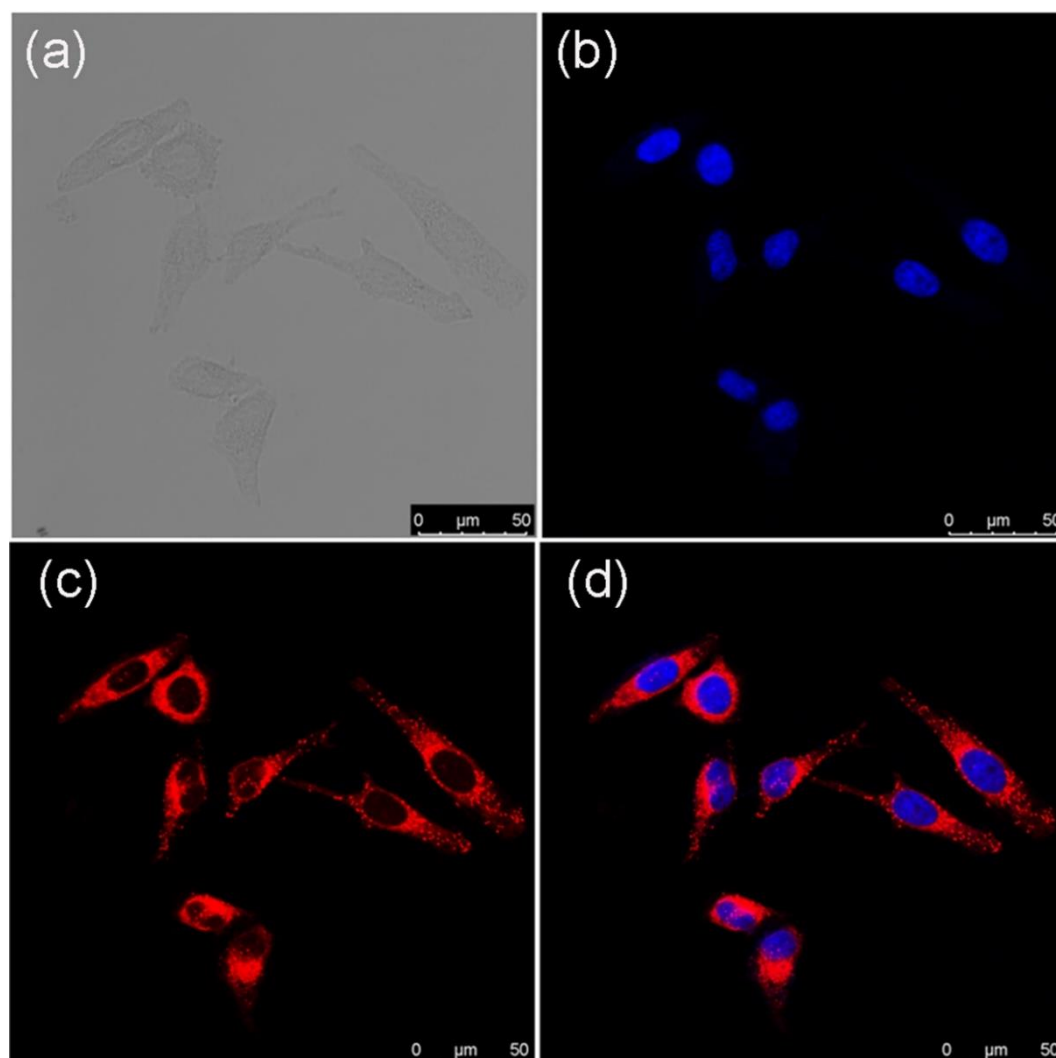

**Figure S40.** Confocal fluorescence images of HeLa cells stained with **5b** (5  $\mu$ M) and DAPI. (a) Bright field. (b) DAPI fluorescence. (c) **5b** fluorescence after incubation for 15 min, using excitation wavelengths of 638 nm, and recording over the 650-760 nm spectral regions. (d) merged images of parts b and c.

## 9. DFT calculations

The ground state geometry was optimized by using DFT method at B3LYP/6-31G(d) level. The same method was used for vibrational analysis to verify that the optimized structures correspond to local minima on the energy surface. TD-DFT computations were used the optimized ground state geometries under the B3LYP/6-31+G(d,p) theoretical level. NICS(0) values were calculated at the GIAO-B3lyp/6-31+G(d,p) level. The calculated molecules in dichloromethane were done using the Self-Consistent Reaction Field (SCRF) method and Polarizable Continuum Model (PCM). All of the calculations were carried out by the methods implemented in Gaussian 09 package.<sup>11</sup>

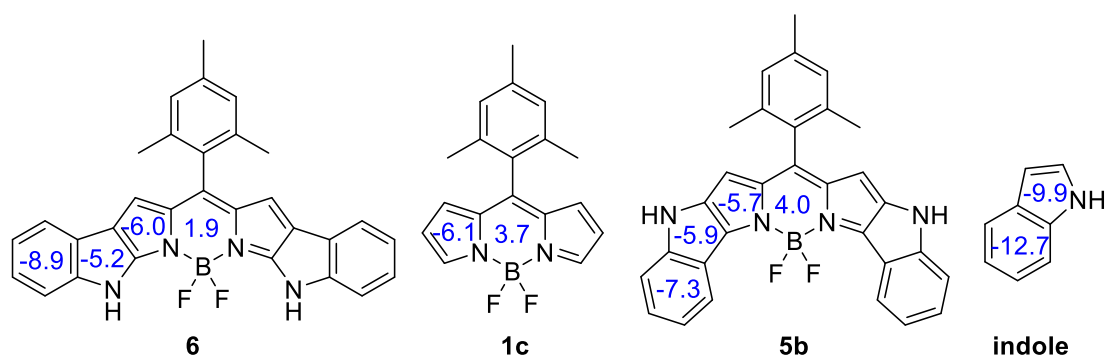

**Figure S41.** NICS(0) values (ppm) for BODIPY **1c**, **5b**, **6** and indole, calculated at the B3LYP/6-31+G(d,p)//B3LYP/6- 31G(d) level.

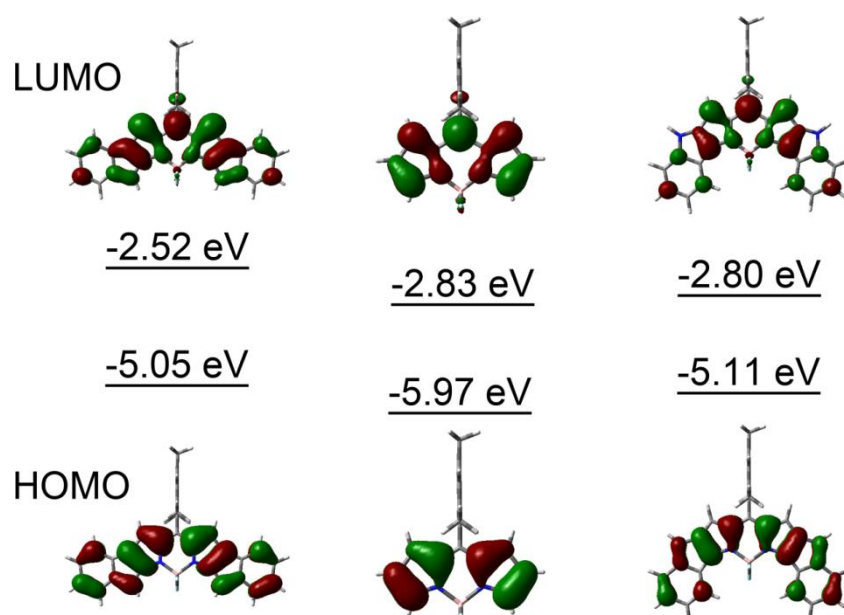

**Figure S42.** HOMO-LUMO energy levels and the interfacial plots of the orbitals for BODIPYs **6**, **1c** and **5b**.

**Table S4.** Selected electronic excitation energies (eV) and oscillator strengths ( $f$ ), configurations of the low-lying excited states of the BODIPYs **5a**, **5b** and **6** calculated by TDDFT/B3LYP/6-31+G(d,p), based on the optimized ground state geometries. The TDDFT of all the molecules in dichloromethane were using the Self Consistent Reaction Field (SCRF) method and the Polarizable Continuum Model (PCM).

|                       |           | TD//B3LYP/6-31+G(d, p)    |           |                |                            |                   |
|-----------------------|-----------|---------------------------|-----------|----------------|----------------------------|-------------------|
| Electronic transition |           | Energy/ eV <sup>[a]</sup> |           | $f^{[b]}$      | Composition <sup>[c]</sup> | CI <sup>[d]</sup> |
| 5a                    | S0→S1     | 2.2748 eV                 | 545.02 nm | 0.1247         | HOMO → LUMO                | 0.5211            |
|                       |           |                           |           |                | HOMO -1 → LUMO             | 0.4770            |
|                       | S0→S2     | 2.5938 eV                 | 478.00 nm | 0.7752         | HOMO -1 → LUMO             | 0.5197            |
|                       |           |                           |           |                | HOMO → LUMO                | 0.4791            |
| S0→S3                 | 2.8954 eV | 428.21 nm                 | 0.0008    | HOMO -2 → LUMO | 0.7044                     |                   |
| 5b                    | S0→S1     | 2.0450 eV                 | 606.28 nm | 0.3906         | HOMO → LUMO                | 0.6334            |
|                       |           |                           |           |                | HOMO -1 → LUMO             | 0.3196            |
|                       | S0→S2     | 2.3642 eV                 | 524.43 nm | 0.6487         | HOMO -1 → LUMO             | 0.6293            |
|                       |           |                           |           |                | HOMO → LUMO                | 0.3231            |
| S0→S3                 | 2.3733 eV | 522.40 nm                 | 0.0165    | HOMO -2 → LUMO | 0.7044                     |                   |
| 6                     | S0→S1     | 2.3550 eV                 | 526.47 nm | 1.3813         | HOMO → LUMO                | 0.7048            |
|                       | S0→S2     | 2.7635 eV                 | 448.65 nm | 0.0136         | HOMO -1 → LUMO             | 0.7008            |
|                       | S0→S3     | 2.9071 eV                 | 426.49 nm | 0.0121         | HOMO -2 → LUMO             | 0.7032            |

[a] Only the selected low-lying excited states are presented. [b] Oscillator strength. [c] Only the main configurations are presented. [d] The CI coefficients are in absolute values.

**Table S5. DFT optimized coordinates for BODIPY 1c, 5a, 5b and 6.****Compound 1c**

|   |             |             |             |
|---|-------------|-------------|-------------|
| B | -3.11783200 | 0.00333200  | 0.02600800  |
| C | -2.55387500 | 2.53514800  | -0.03174400 |
| C | -1.42551200 | 3.37944400  | -0.03878000 |
| C | -0.30836500 | 2.55296400  | -0.02331100 |
| C | -0.77791800 | 1.21373400  | -0.00801900 |
| C | -0.07600800 | -0.00014900 | -0.00275200 |
| C | -0.78068300 | -1.21244500 | -0.00751600 |
| C | -0.31424200 | -2.55276600 | -0.02217900 |
| C | -1.43330200 | -3.37666300 | -0.03731200 |
| C | -2.55970600 | -2.52975800 | -0.03068200 |
| C | 1.42032700  | -0.00159800 | 0.00137600  |
| C | 2.11518600  | -0.00411600 | 1.22923700  |
| C | 3.51373100  | -0.00908300 | 1.20748100  |
| C | 4.23693800  | -0.00870100 | 0.01084300  |
| C | 3.52176900  | -0.01027100 | -1.19059700 |
| C | 2.12335400  | -0.00530800 | -1.22182800 |
| C | 1.38137700  | -0.00564800 | 2.55201400  |
| C | 5.74758400  | 0.01761200  | 0.01591000  |
| C | 1.39883800  | -0.00800900 | -2.54974800 |
| F | -3.86242500 | 0.00440400  | 1.20147400  |
| F | -3.96064500 | 0.00410200  | -1.07982800 |
| N | -2.17423900 | 1.24622000  | -0.01307300 |
| N | -2.17708000 | -1.24170100 | -0.01259600 |
| H | -1.44656400 | 4.46029700  | -0.05487600 |
| H | 0.73219300  | 2.84693200  | -0.02545600 |
| H | 0.72562000  | -2.84922200 | -0.02414100 |
| H | -1.45682700 | -4.45747300 | -0.05292100 |
| H | -3.60876500 | -2.79506100 | -0.03793600 |
| H | 4.05068800  | -0.01471900 | 2.15372700  |
| H | 4.06509300  | -0.01686100 | -2.13319600 |
| H | 2.08776500  | -0.00634000 | 3.38691300  |
| H | 0.73681200  | -0.88638700 | 2.65535100  |
| H | 0.73686500  | 0.87493400  | 2.65689500  |
| H | 6.15947500  | -0.47619400 | -0.87031800 |
| H | 6.15351600  | -0.47732100 | 0.90426500  |
| H | 6.12416100  | 1.04914500  | 0.01785400  |
| H | 0.75511100  | -0.88886800 | -2.65698900 |
| H | 2.11114200  | -0.00936600 | -3.37959900 |
| H | 0.75510900  | 0.87247400  | -2.66000500 |
| H | -3.60232500 | 2.80287300  | -0.03909900 |

**Compound 5a**

|   |             |             |             |
|---|-------------|-------------|-------------|
| C | -1.25871113 | 1.82832048  | -0.11993197 |
| C | -0.03017072 | -0.26111966 | 0.04402414  |
| C | -1.24712192 | 0.42138956  | -0.01552071 |
| C | -2.33433482 | 2.73068904  | -0.30137463 |
| C | -1.78630302 | 4.00829073  | -0.40992394 |
| C | -0.39387286 | 3.86318869  | -0.28729549 |
| N | 1.18592087  | 0.44175904  | 0.01818799  |
| N | -0.07504532 | 2.56485695  | -0.11555158 |
| B | 1.32832745  | 1.97875280  | 0.20456552  |
| F | 2.28870896  | 2.48629280  | -0.66868996 |
| C | 0.22230186  | -1.67273884 | 0.06671383  |
| C | 1.59840225  | -1.79481038 | 0.04457831  |
| C | 2.16544133  | -0.48456516 | 0.01070467  |
| F | 1.68004295  | 2.27096030  | 1.52331316  |
| H | -0.53805248 | -2.43995488 | 0.07894686  |
| H | -3.37779074 | 2.45267837  | -0.35858958 |
| H | -2.31363674 | 4.93931483  | -0.56636480 |
| H | 0.37768124  | 4.62123884  | -0.31276179 |
| C | -2.53964957 | -0.33315347 | -0.00237666 |
| C | -3.10104886 | -0.79131678 | -1.21266689 |
| C | -3.19113861 | -0.57596623 | 1.22578922  |
| C | -4.31419113 | -1.48768805 | -1.16948176 |
| C | -4.40115861 | -1.27714773 | 1.21758206  |
| C | -4.98257361 | -1.73873783 | 0.03231480  |
| H | -4.74632712 | -1.84252768 | -2.10282802 |
| H | -4.90117346 | -1.46755430 | 2.16505802  |
| C | -2.42016498 | -0.54784493 | -2.54146507 |
| H | -2.26248119 | 0.52142759  | -2.72383596 |
| H | -1.43489026 | -1.02666655 | -2.58336423 |
| H | -3.02205169 | -0.94470832 | -3.36394350 |
| C | -2.60424576 | -0.10023941 | 2.53619680  |
| H | -1.61121015 | -0.52991173 | 2.71294798  |
| H | -2.48613827 | 0.98946802  | 2.55268067  |
| H | -3.24749780 | -0.38228406 | 3.37463178  |
| C | -6.30694766 | -2.46591851 | 0.05014356  |
| H | -7.14649170 | -1.75835789 | 0.02876233  |
| H | -6.41411441 | -3.12429144 | -0.81798269 |
| H | -6.41856511 | -3.07165071 | 0.95571826  |
| C | 3.58893824  | -0.60926668 | -0.02399435 |
| C | 4.66508189  | 0.29049036  | -0.08839388 |
| C | 3.83401991  | -2.02164970 | -0.00176585 |
| C | 5.95841099  | -0.21719300 | -0.11247217 |
| H | 4.47275734  | 1.35721685  | -0.13167112 |
| C | 5.13623701  | -2.52387740 | -0.02705725 |

|   |            |             |             |
|---|------------|-------------|-------------|
| C | 6.18593160 | -1.60745255 | -0.07924221 |
| H | 6.80443232 | 0.46159662  | -0.16197835 |
| H | 5.32536577 | -3.59294603 | -0.00926297 |
| H | 7.20672271 | -1.97896255 | -0.09981217 |
| N | 2.62866220 | -2.71552484 | 0.03943326  |
| H | 2.53750228 | -3.71990022 | 0.04421794  |

#### Compound 5b

|   |             |             |             |
|---|-------------|-------------|-------------|
| C | -0.76339082 | 1.20903079  | 0.04207435  |
| C | -0.74142308 | -1.22218160 | 0.04185521  |
| C | -1.45461452 | -0.01291422 | 0.04274172  |
| C | -1.27855709 | 2.54003165  | -0.05661241 |
| C | -0.16204081 | 3.35939535  | -0.08711511 |
| C | 0.99958474  | 2.53968882  | -0.00624558 |
| N | 0.66007117  | -1.22682842 | 0.07666897  |
| N | 0.63780334  | 1.23899526  | 0.07701957  |
| B | 1.52821869  | 0.01397963  | 0.40926348  |
| F | 2.69098966  | 0.02457999  | -0.36819465 |
| C | -1.23245288 | -2.56226468 | -0.05703743 |
| C | -0.10131916 | -3.36130442 | -0.08775165 |
| C | 1.04527196  | -2.52074294 | -0.00691247 |
| F | 1.86787388  | 0.01681336  | 1.76460823  |
| H | -2.27457184 | -2.84099368 | -0.11406377 |
| H | -2.32554866 | 2.79982586  | -0.11371734 |
| C | -2.95155188 | -0.02652404 | 0.00702236  |
| C | -3.62826456 | -0.03320270 | -1.23103637 |
| C | -3.67739988 | -0.03818271 | 1.21711821  |
| C | -5.02738929 | -0.05043475 | -1.23310008 |
| C | -5.07508955 | -0.05538437 | 1.16423577  |
| C | -5.77057021 | -0.05824166 | -0.04886764 |
| H | -5.54876456 | -0.05939734 | -2.18815110 |
| H | -5.63383907 | -0.06825071 | 2.09788909  |
| C | -2.87384543 | -0.02659105 | -2.54218508 |
| H | -2.23541829 | 0.85967754  | -2.63478785 |
| H | -2.21930101 | -0.90102769 | -2.63488332 |
| H | -3.56678986 | -0.03279036 | -3.38851602 |
| C | -2.97371295 | -0.03660056 | 2.55606976  |
| H | -2.32447967 | -0.91243602 | 2.67104994  |
| H | -2.33721692 | 0.84797157  | 2.67512735  |
| H | -3.69791018 | -0.04371002 | 3.37579466  |
| C | -7.28130807 | -0.04508632 | -0.07852826 |
| H | -7.66801636 | 0.98270019  | -0.06727432 |
| H | -7.66824412 | -0.52712768 | -0.98236431 |
| H | -7.70340123 | -0.55900311 | 0.79147163  |

|   |             |             |             |
|---|-------------|-------------|-------------|
| C | 2.21350593  | -3.34358760 | -0.05014103 |
| C | 3.59836096  | -3.11097415 | -0.03427750 |
| C | 1.71427884  | -4.68461528 | -0.15090388 |
| C | 4.46005214  | -4.19957687 | -0.10129706 |
| H | 3.97167889  | -2.09366942 | 0.01614505  |
| C | 2.58632176  | -5.77267226 | -0.21801258 |
| C | 3.95610767  | -5.51248047 | -0.18913007 |
| H | 5.53405211  | -4.03932616 | -0.09030031 |
| H | 2.20979434  | -6.78864660 | -0.29214225 |
| H | 4.65090393  | -6.34626997 | -0.24057001 |
| N | 0.32353846  | -4.67429554 | -0.17068270 |
| H | -0.26115666 | -5.49062920 | -0.26350213 |
| C | 2.15278311  | 3.38352486  | -0.04910333 |
| C | 3.54166880  | 3.17621070  | -0.03282527 |
| C | 1.62933183  | 4.71529785  | -0.14984130 |
| C | 4.38340386  | 4.28034171  | -0.09951977 |
| H | 3.93361614  | 2.16594328  | 0.01775247  |
| C | 2.48141589  | 5.81902655  | -0.21667369 |
| C | 3.85569224  | 5.58387182  | -0.18745931 |
| H | 5.46013727  | 4.13964103  | -0.08821294 |
| H | 2.08644370  | 6.82794907  | -0.29077698 |
| H | 4.53519430  | 6.43018124  | -0.23868406 |
| N | 0.23902664  | 4.67986047  | -0.16992702 |
| H | -0.36020221 | 5.48568267  | -0.26211817 |

#### Compound 6

|   |             |             |             |
|---|-------------|-------------|-------------|
| C | 1.21368000  | 0.30668500  | 0.10494200  |
| C | 0.00047800  | 1.00878600  | 0.09886100  |
| C | -1.21381400 | 0.30856700  | 0.10439900  |
| N | 1.22470200  | -1.11038200 | 0.15360100  |
| N | -1.22708800 | -1.10847200 | 0.15335700  |
| B | -0.00192200 | -2.00377200 | 0.45501100  |
| F | -0.00270800 | -3.13386100 | -0.36740400 |
| F | -0.00235600 | -2.40456300 | 1.79383400  |
| C | -5.67361500 | -3.14161400 | -0.19328300 |
| C | -4.58009900 | -2.28805700 | -0.10935100 |
| C | -4.72069800 | -0.86726900 | -0.16119000 |
| C | -5.99911800 | -0.31767300 | -0.29777500 |
| C | -7.10154500 | -1.17088600 | -0.38139300 |
| C | -6.93992800 | -2.56323200 | -0.33058900 |
| H | -5.54999700 | -4.21984000 | -0.15401400 |
| H | -6.13137400 | 0.75985800  | -0.33911900 |
| H | -8.09753000 | -0.75071600 | -0.48771700 |
| H | -7.81139600 | -3.20813900 | -0.39833700 |

|   |             |             |             |
|---|-------------|-------------|-------------|
| C | -3.37960400 | -0.33005400 | -0.05223700 |
| C | -2.51622600 | -1.45618100 | 0.05527300  |
| N | -3.21754500 | -2.61844500 | 0.03319000  |
| H | -2.82965800 | -3.55100000 | 0.03488700  |
| C | -2.54901300 | 0.78818500  | -0.01549900 |
| H | -2.81789600 | 1.83311200  | -0.08520000 |
| C | 5.66807800  | -3.15048500 | -0.19242400 |
| C | 4.57591300  | -2.29520700 | -0.10843500 |
| C | 4.71878600  | -0.87462900 | -0.15982000 |
| C | 5.99811300  | -0.32703600 | -0.29597400 |
| C | 7.09919400  | -1.18198100 | -0.37963000 |
| C | 6.93534100  | -2.57408300 | -0.32930000 |
| H | 5.54272800  | -4.22852700 | -0.15355800 |
| H | 6.13210000  | 0.75029400  | -0.33697600 |
| H | 8.09587000  | -0.76337000 | -0.48562500 |
| H | 7.80579000  | -3.22035900 | -0.39709400 |
| C | 3.37851700  | -0.33531100 | -0.05107600 |
| C | 2.51332200  | -1.46009800 | 0.05586300  |
| N | 3.21280100  | -2.62346500 | 0.03368500  |
| H | 2.82343100  | -3.55540000 | 0.03498600  |
| C | 2.54968000  | 0.78422700  | -0.01427600 |
| H | 2.82021400  | 1.82874900  | -0.08356700 |
| C | 0.00198500  | 2.50616000  | 0.05302100  |
| C | 0.00313500  | 3.17591200  | -1.18863400 |
| C | -0.00236400 | 3.23953000  | 1.25889700  |
| C | 0.00144500  | 4.57532500  | -1.19878700 |
| C | -0.00409500 | 4.63683600  | 1.19812600  |
| C | 0.00140500  | 5.32534000  | -0.01908100 |
| H | -0.00114800 | 5.09129000  | -2.15678200 |
| H | -0.01118000 | 5.20111700  | 2.12853100  |
| C | 0.00208600  | 2.41512500  | -2.49614700 |
| H | 0.88190600  | 1.76750200  | -2.58556600 |
| H | -0.87884500 | 1.76900300  | -2.58553500 |
| H | 0.00273800  | 3.10408000  | -3.34574000 |
| C | 0.03147700  | 6.83566600  | -0.05671700 |
| H | 1.06240500  | 7.21173700  | -0.01473600 |
| H | -0.41806400 | 7.22228600  | -0.97719100 |
| H | -0.50491500 | 7.26827900  | 0.79447900  |
| C | -0.00893700 | 2.54440600  | 2.60232000  |
| H | -0.89104800 | 1.90435500  | 2.72018200  |
| H | 0.86932400  | 1.90016600  | 2.72599500  |
| H | -0.00983100 | 3.27382100  | 3.41742900  |



# 10. $^1\text{H}$ , $^{13}\text{C}$ NMR and HRMS spectra for all new compounds

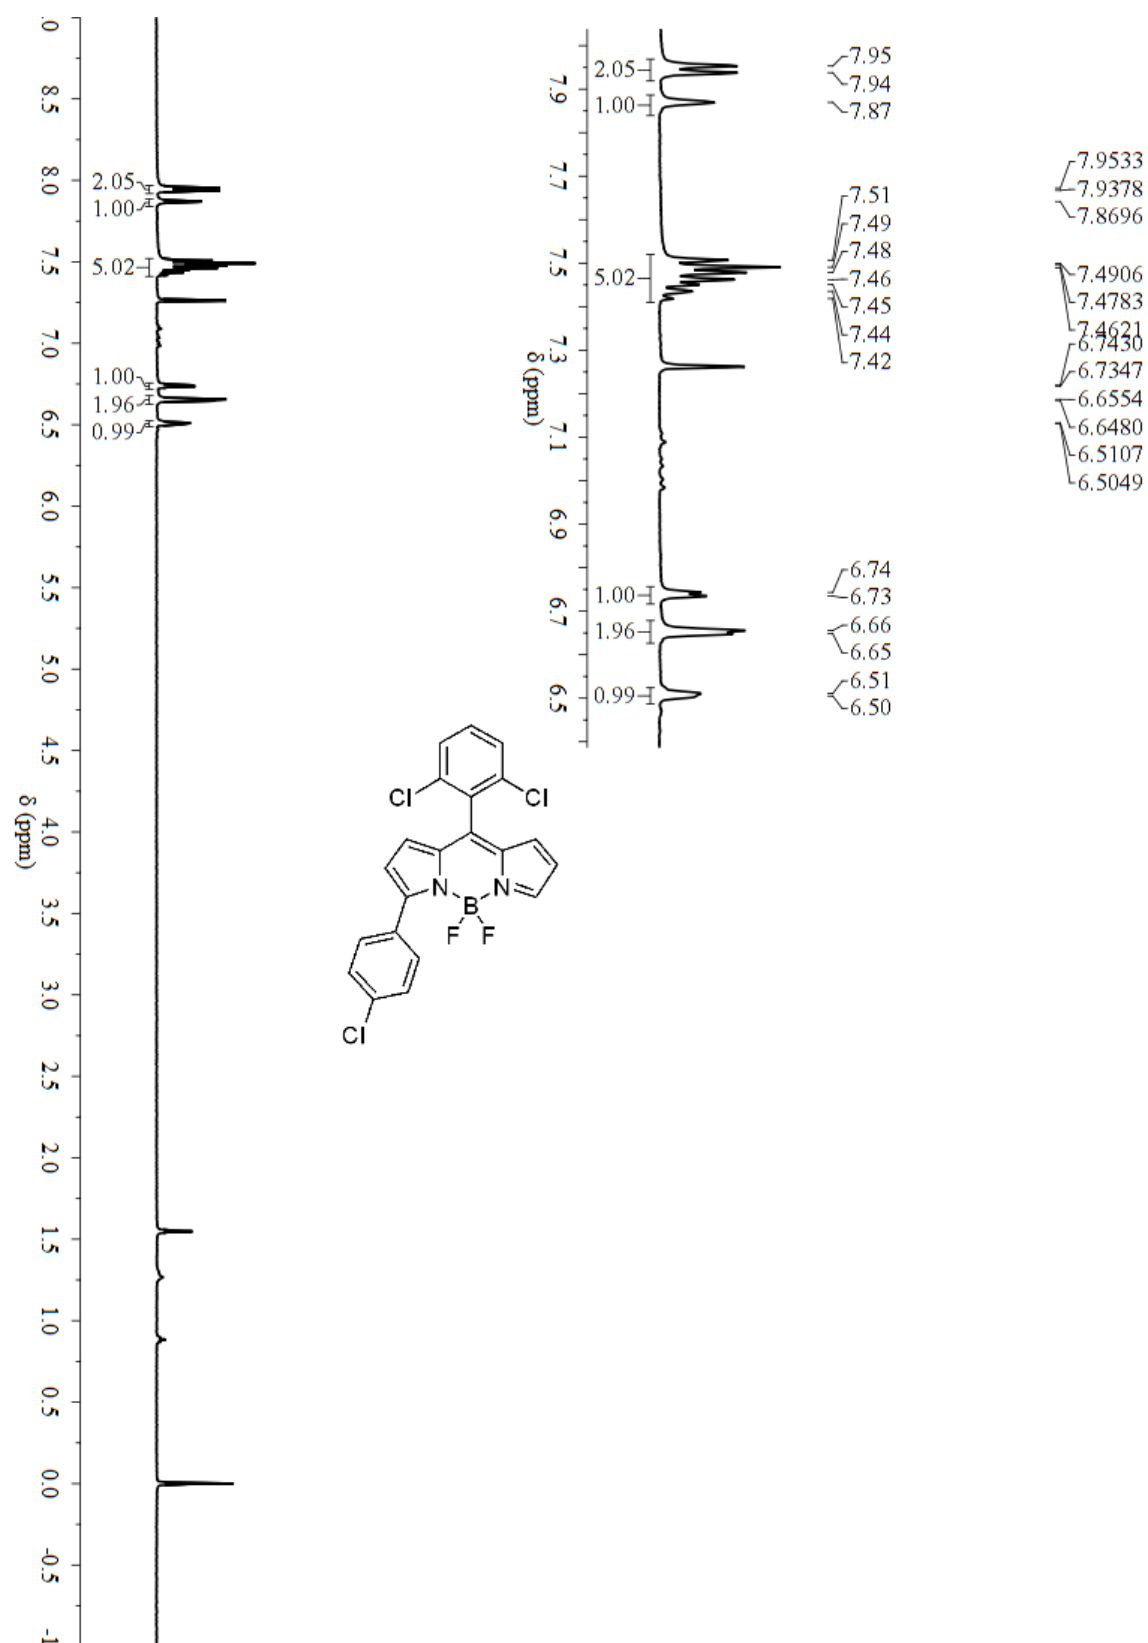

$^1\text{H}$  NMR spectrum of **3a** in  $\text{CDCl}_3$

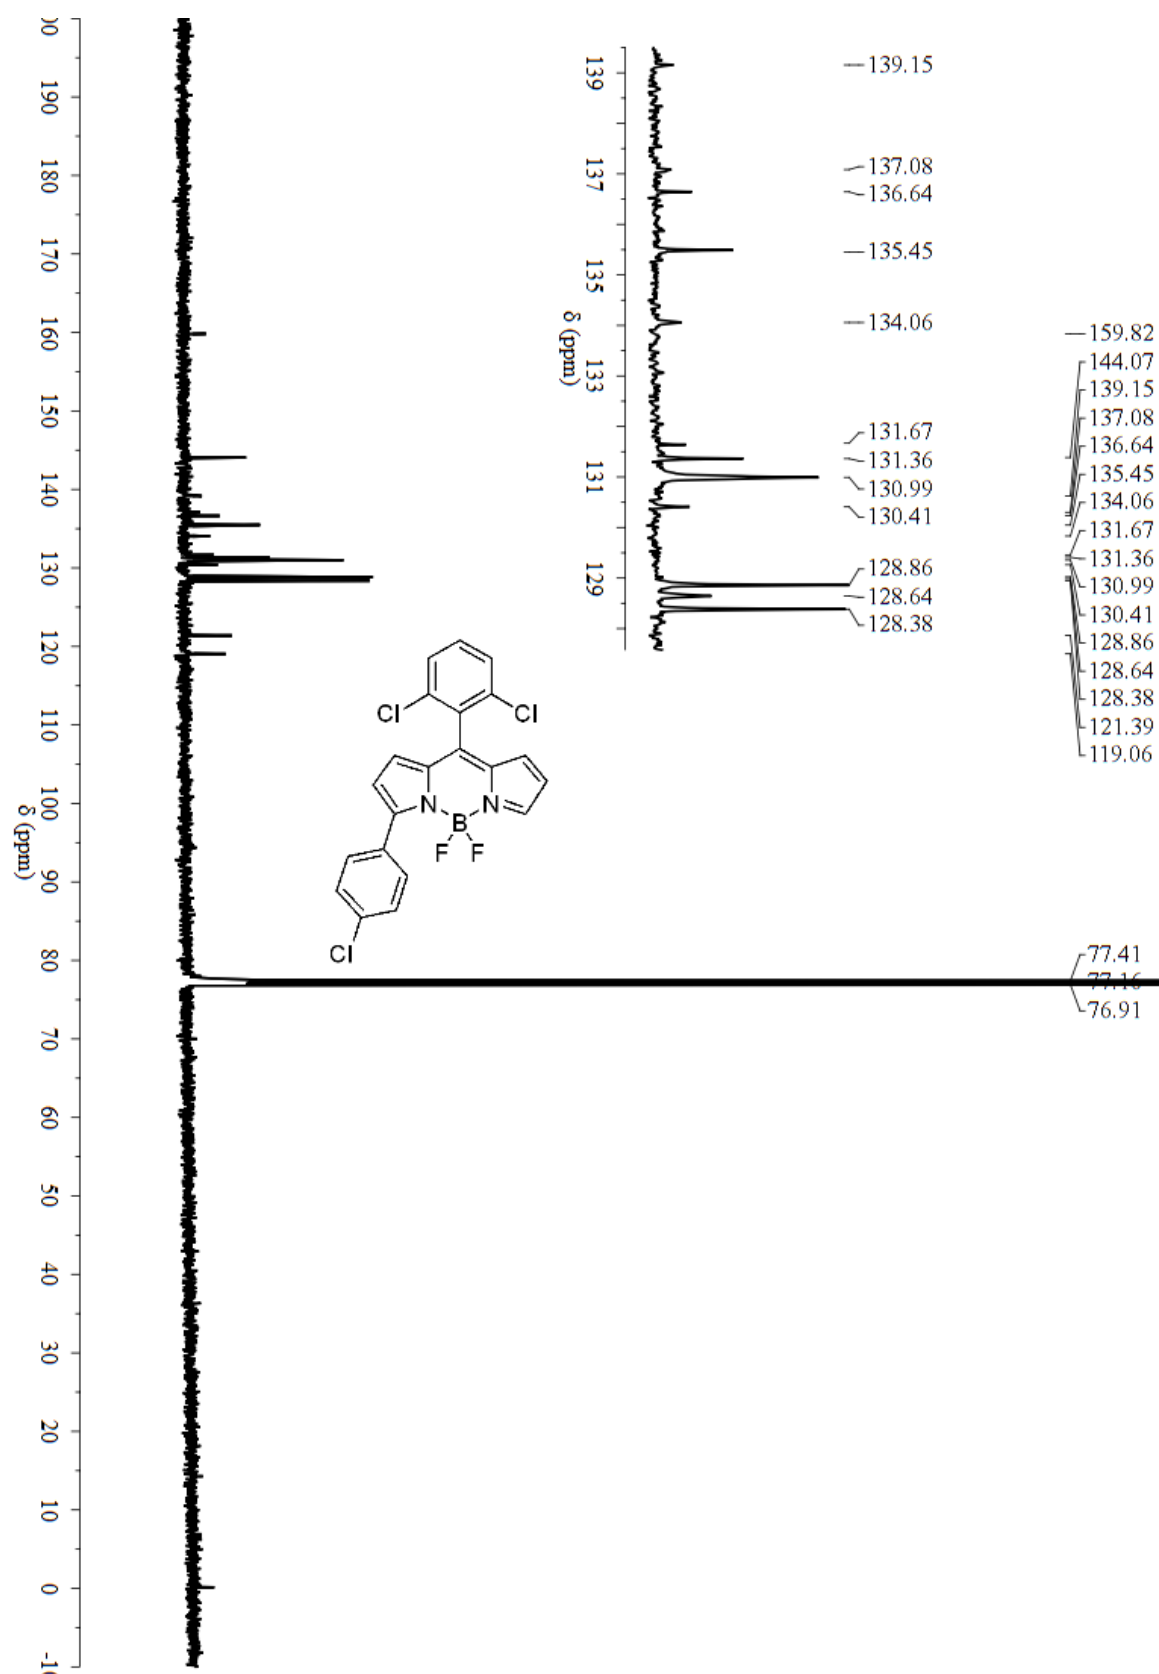

<sup>13</sup>C NMR spectrum of **3a** in CDCl<sub>3</sub>

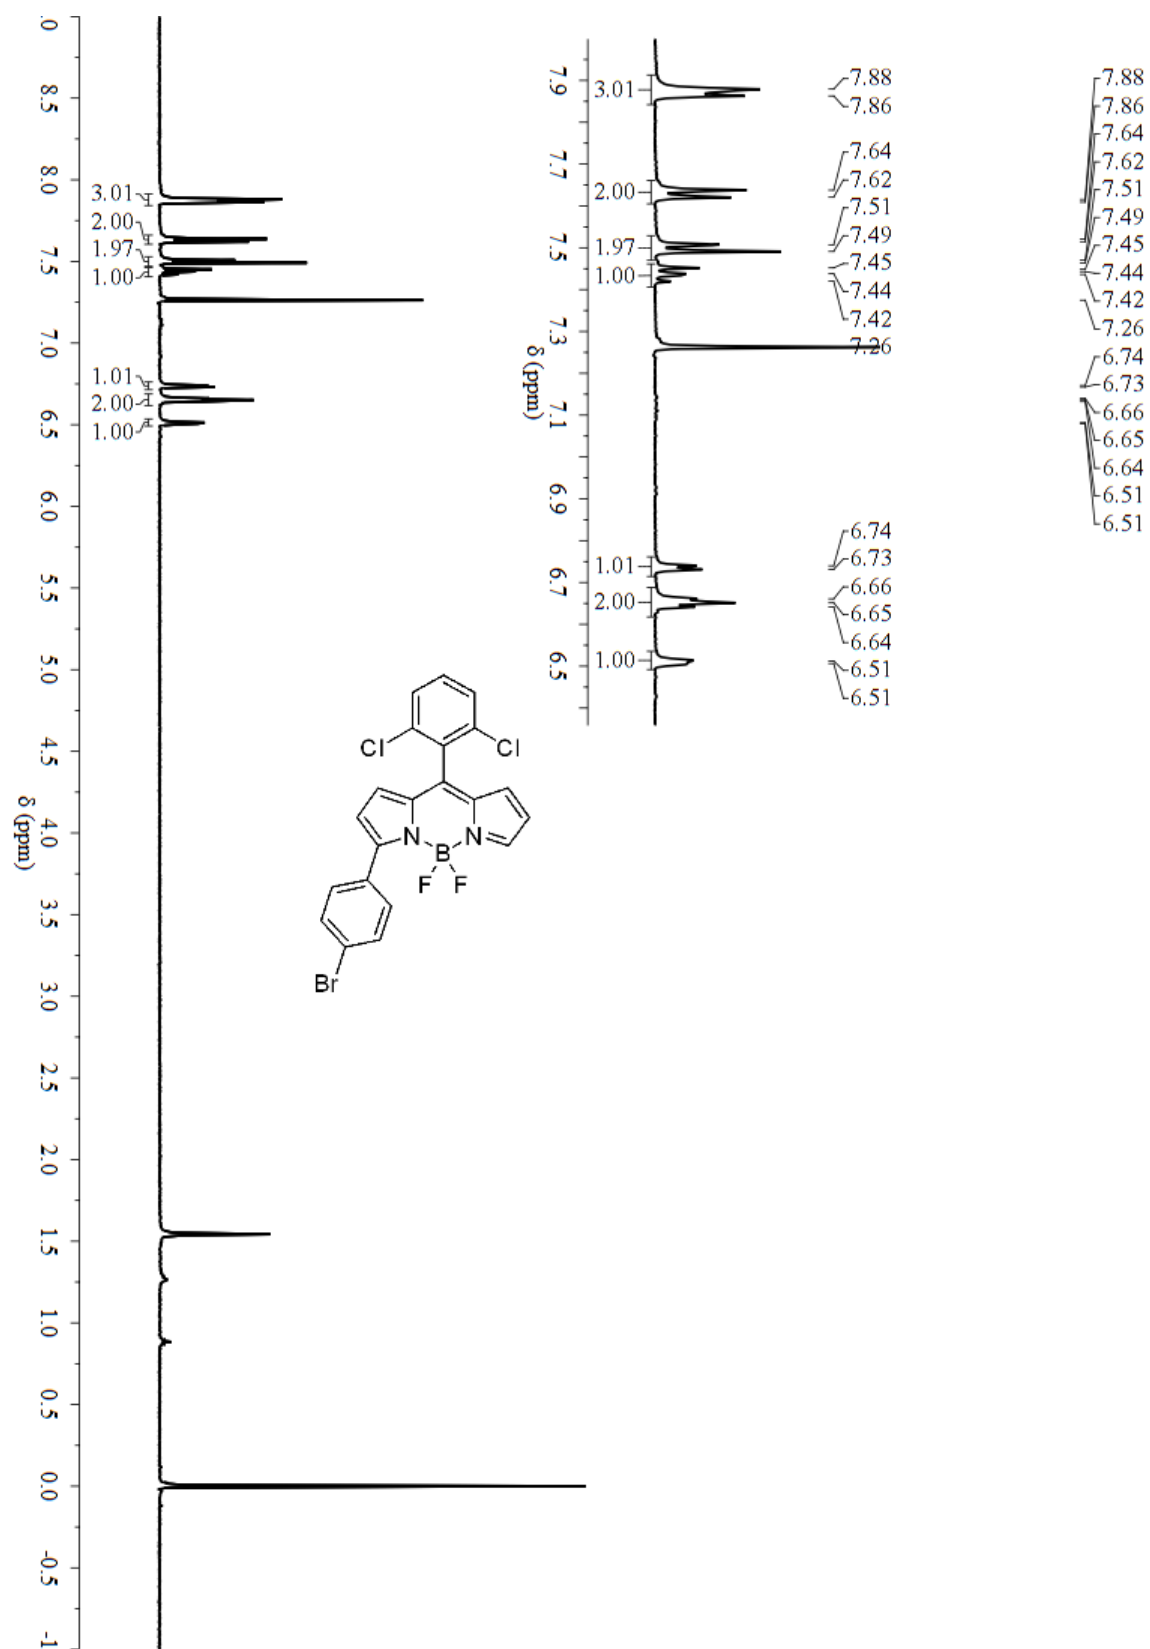

<sup>1</sup>H NMR spectrum of **3b** in CDCl<sub>3</sub>

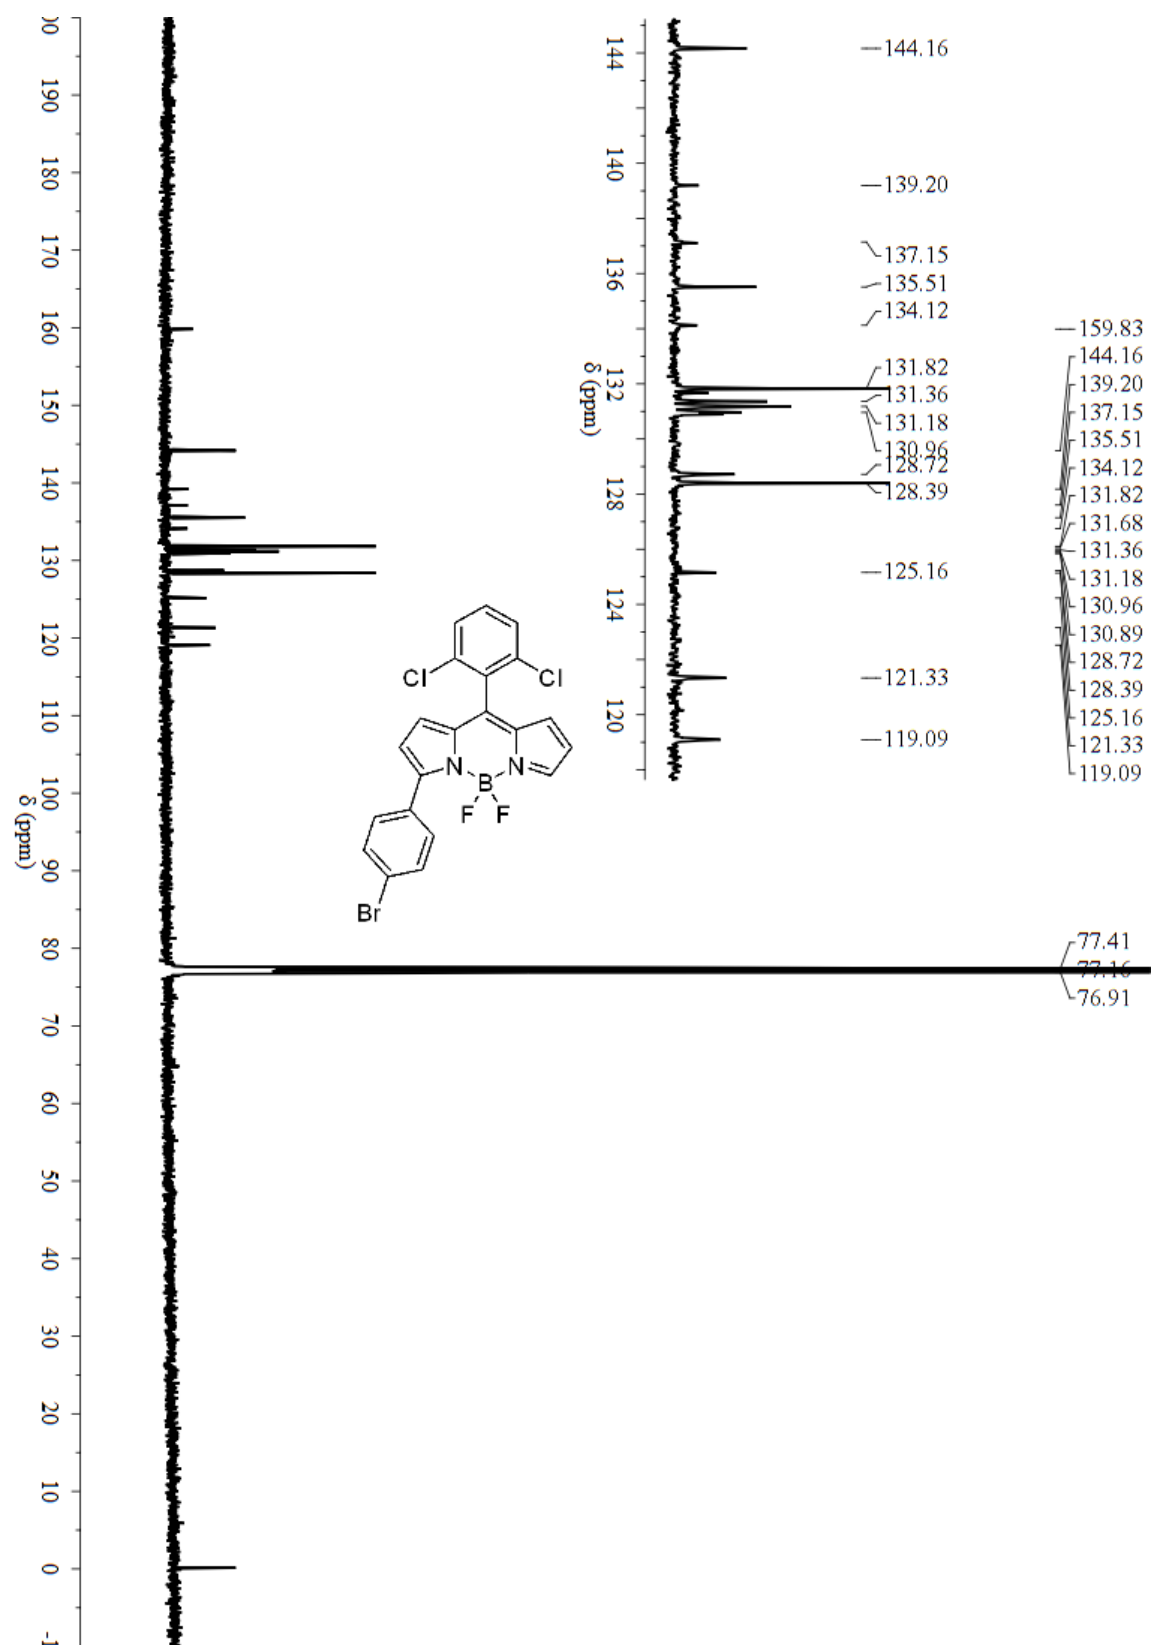

$^{13}\text{C}$  NMR spectrum of **3b** in  $\text{CDCl}_3$

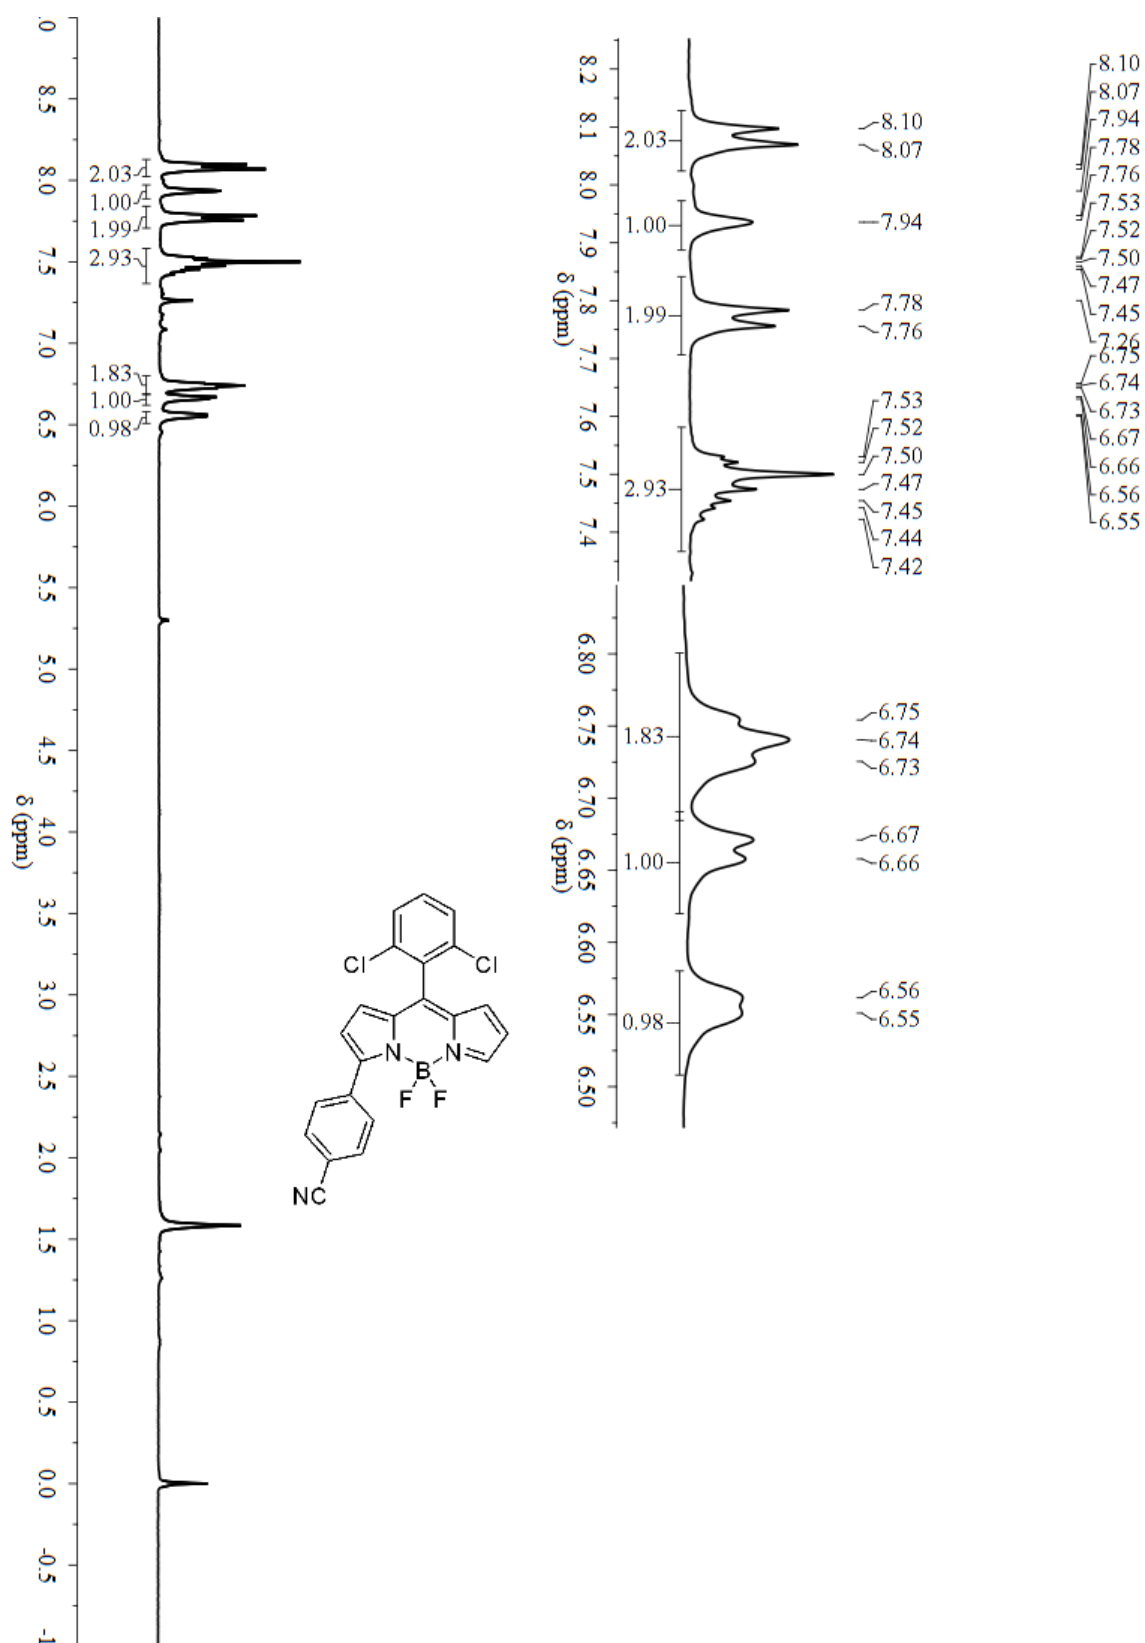

<sup>1</sup>H NMR spectrum of **3c** in CDCl<sub>3</sub>

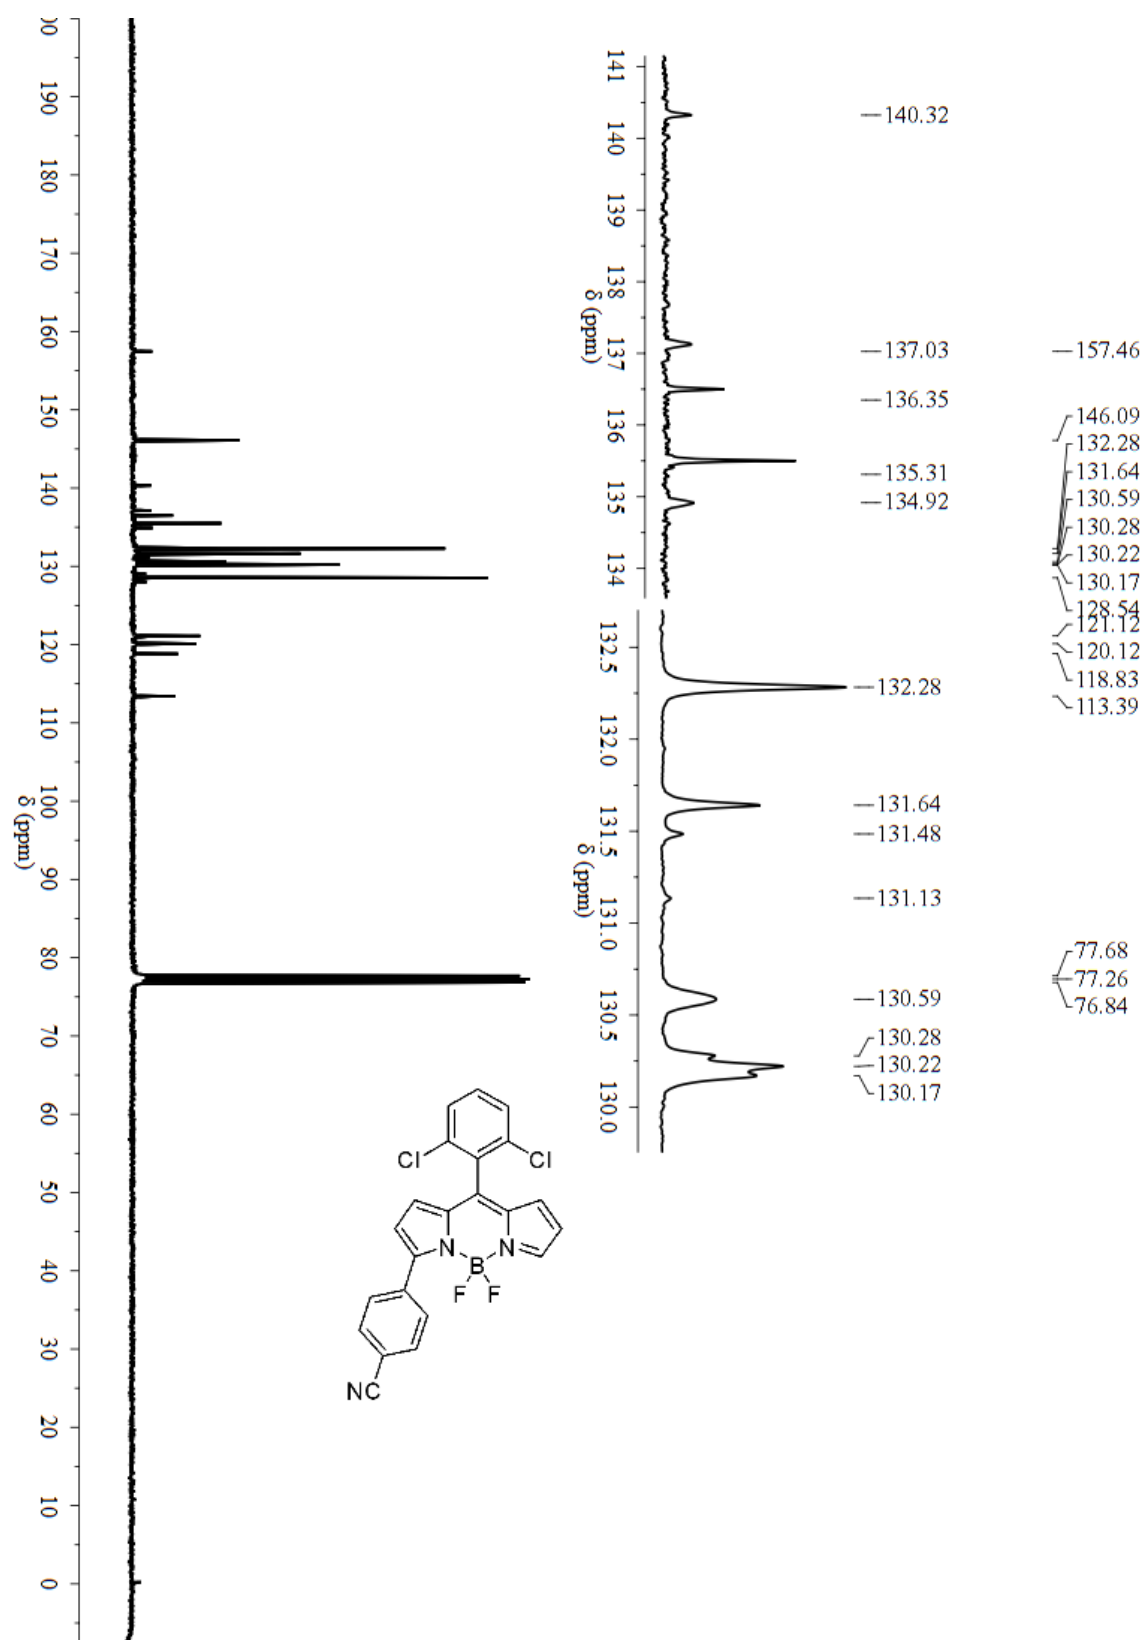

<sup>13</sup>C NMR spectrum of **3c** in CDCl<sub>3</sub>

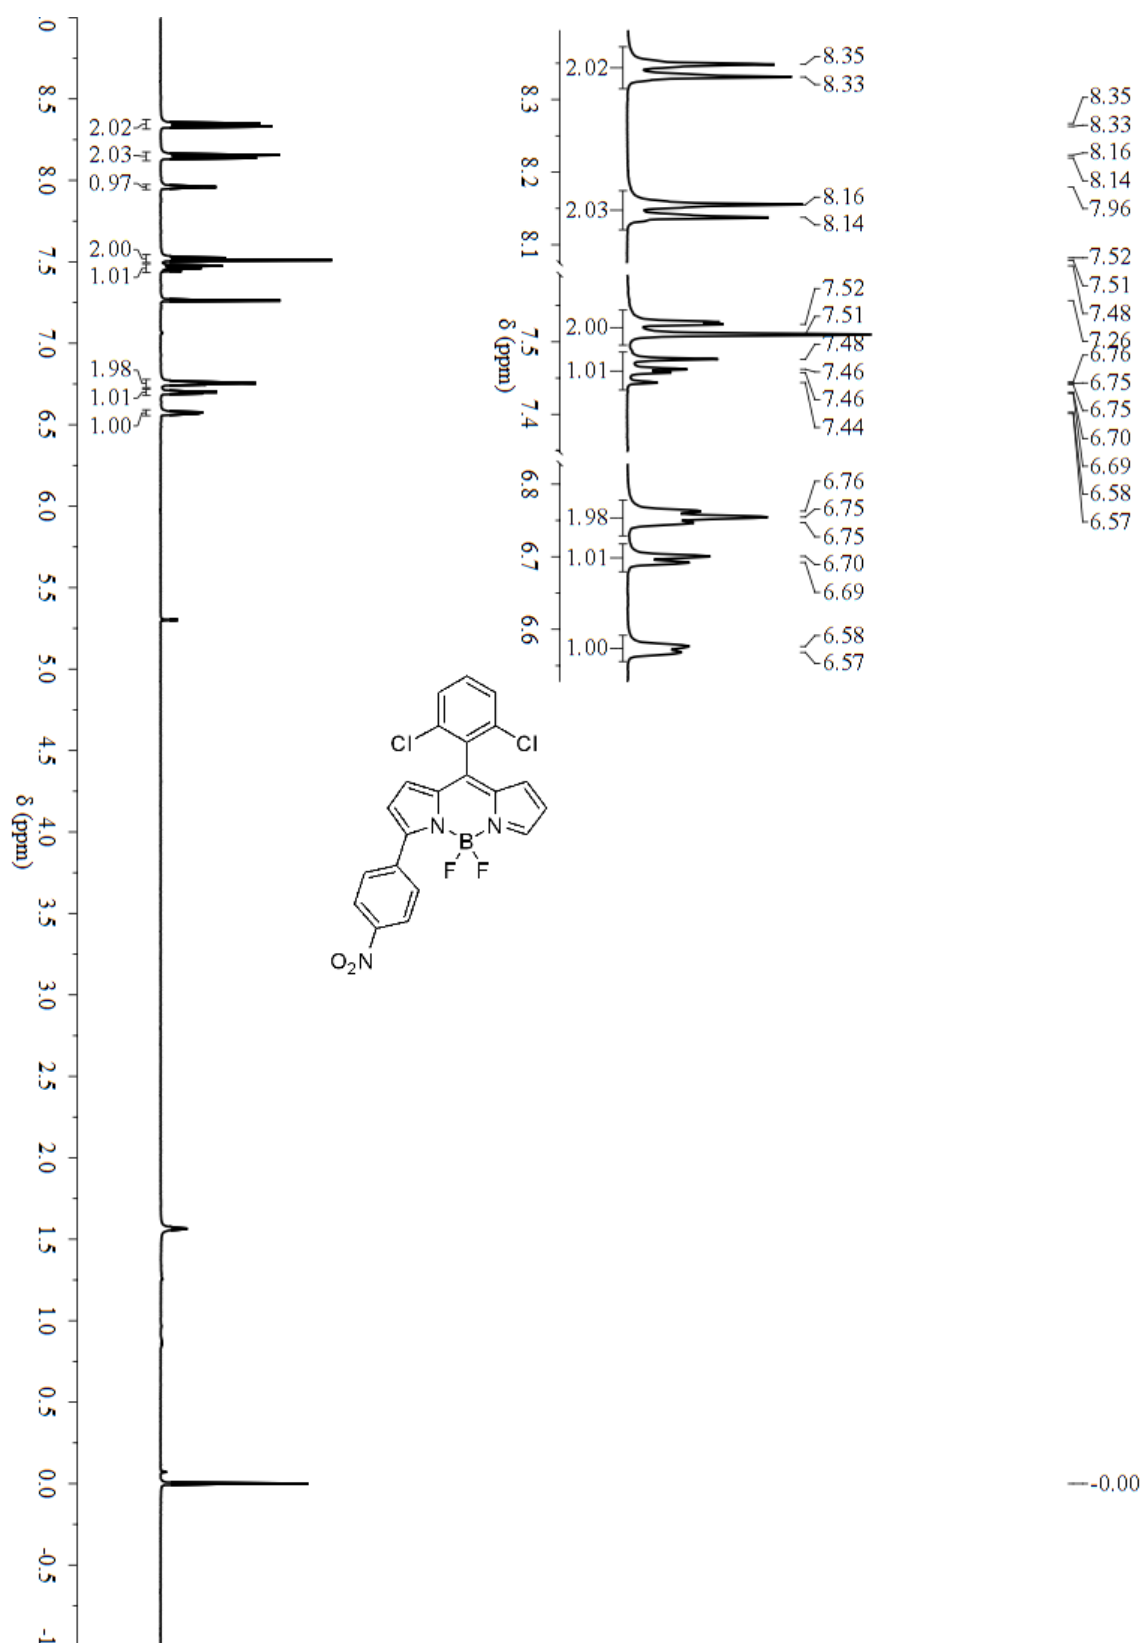

<sup>1</sup>H NMR spectrum of **3d** in CDCl<sub>3</sub>

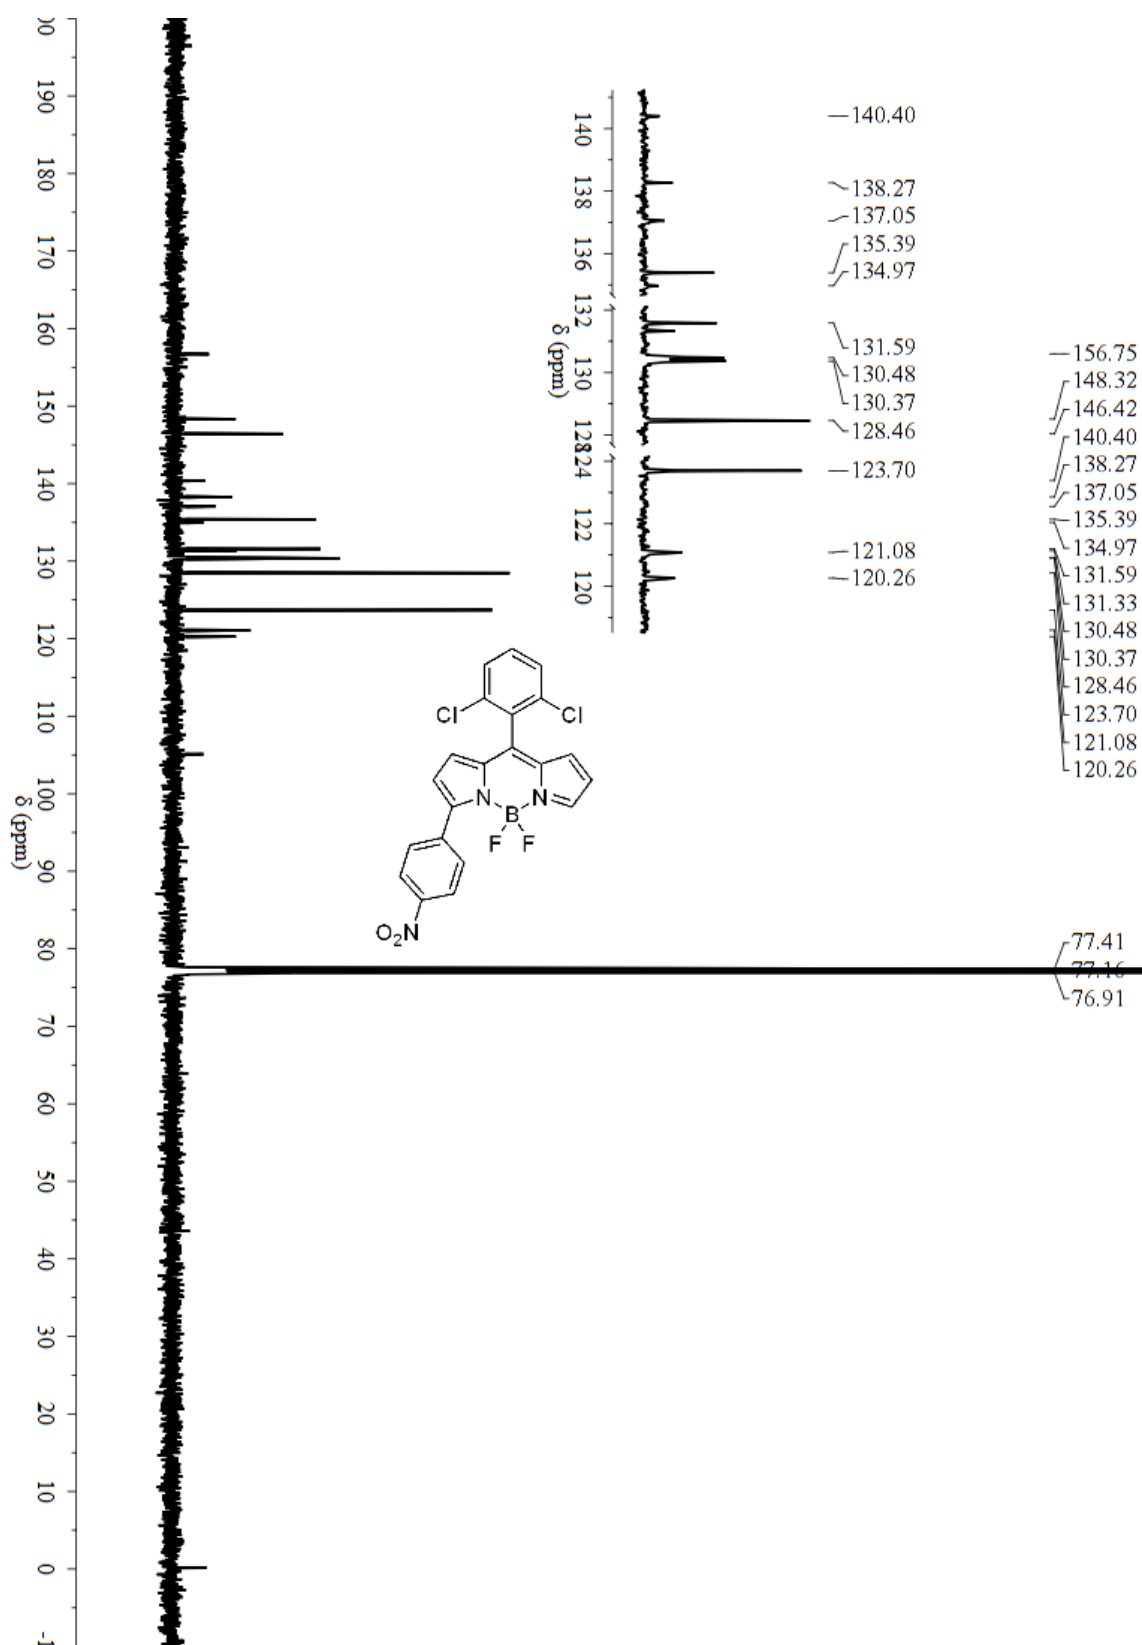

$^{13}\text{C}$  NMR spectrum of **3d** in  $\text{CDCl}_3$



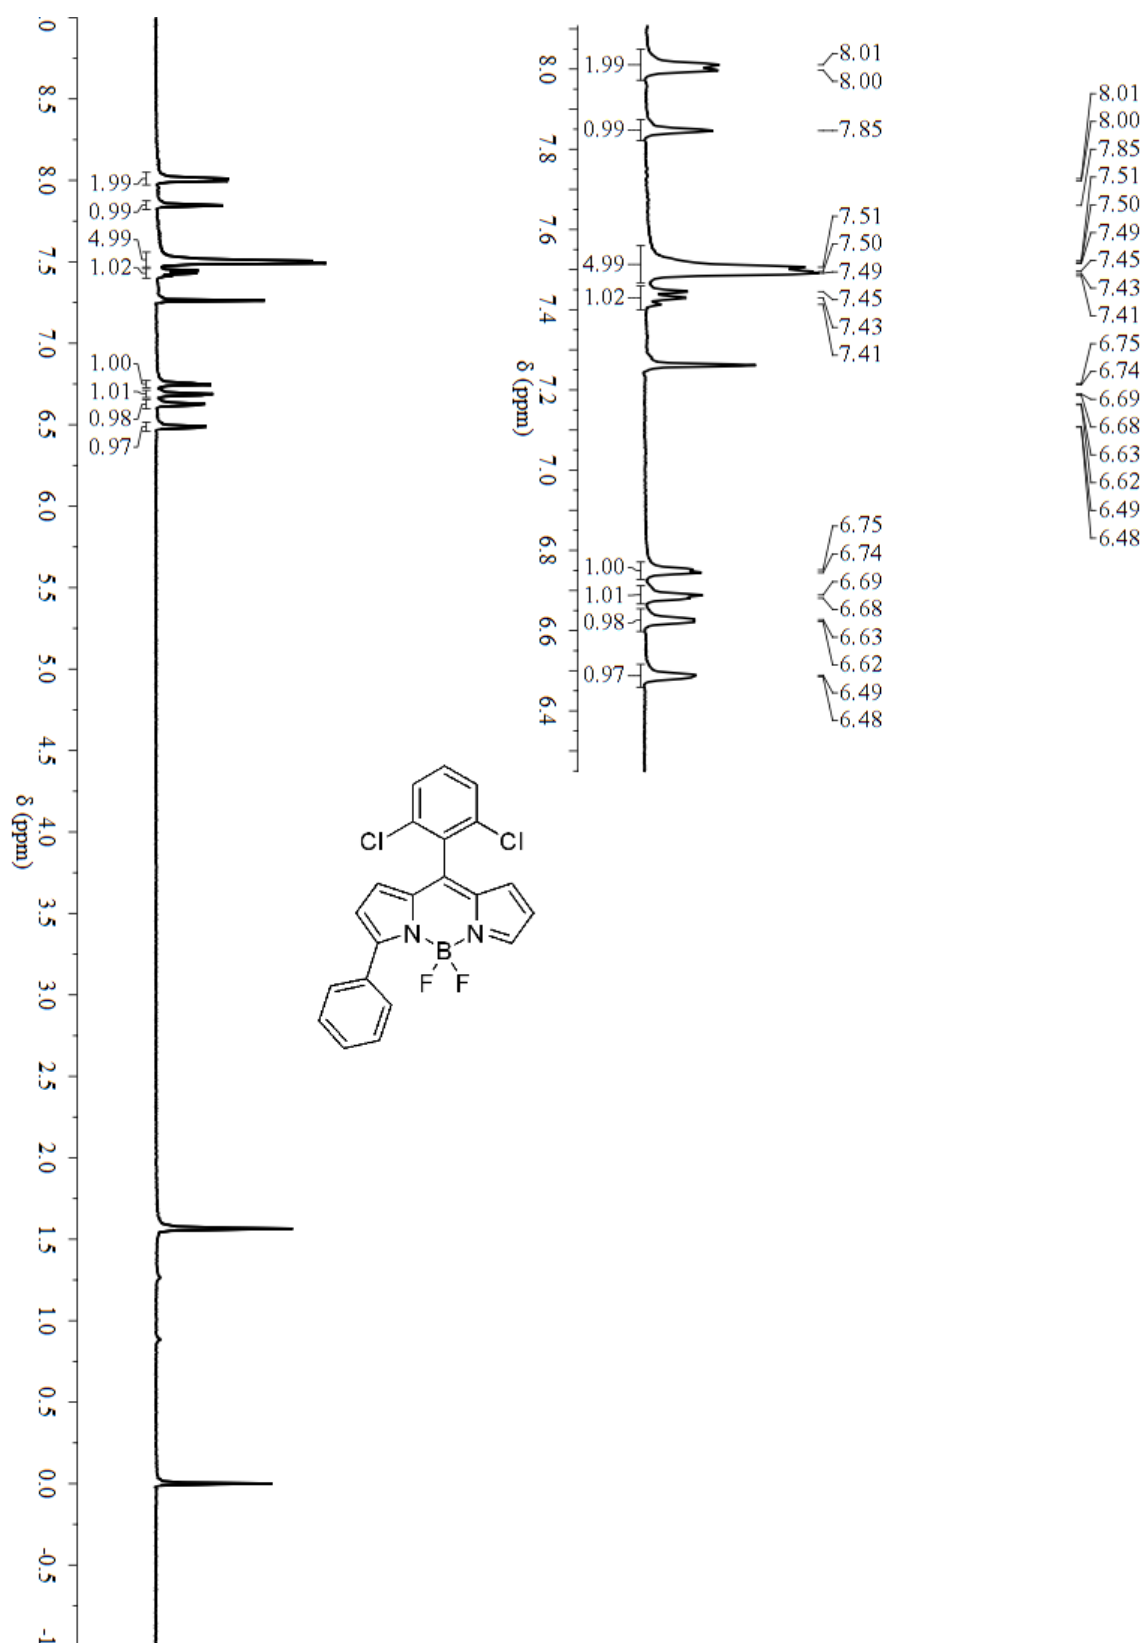

<sup>1</sup>H NMR spectrum of **3e** in CDCl<sub>3</sub>

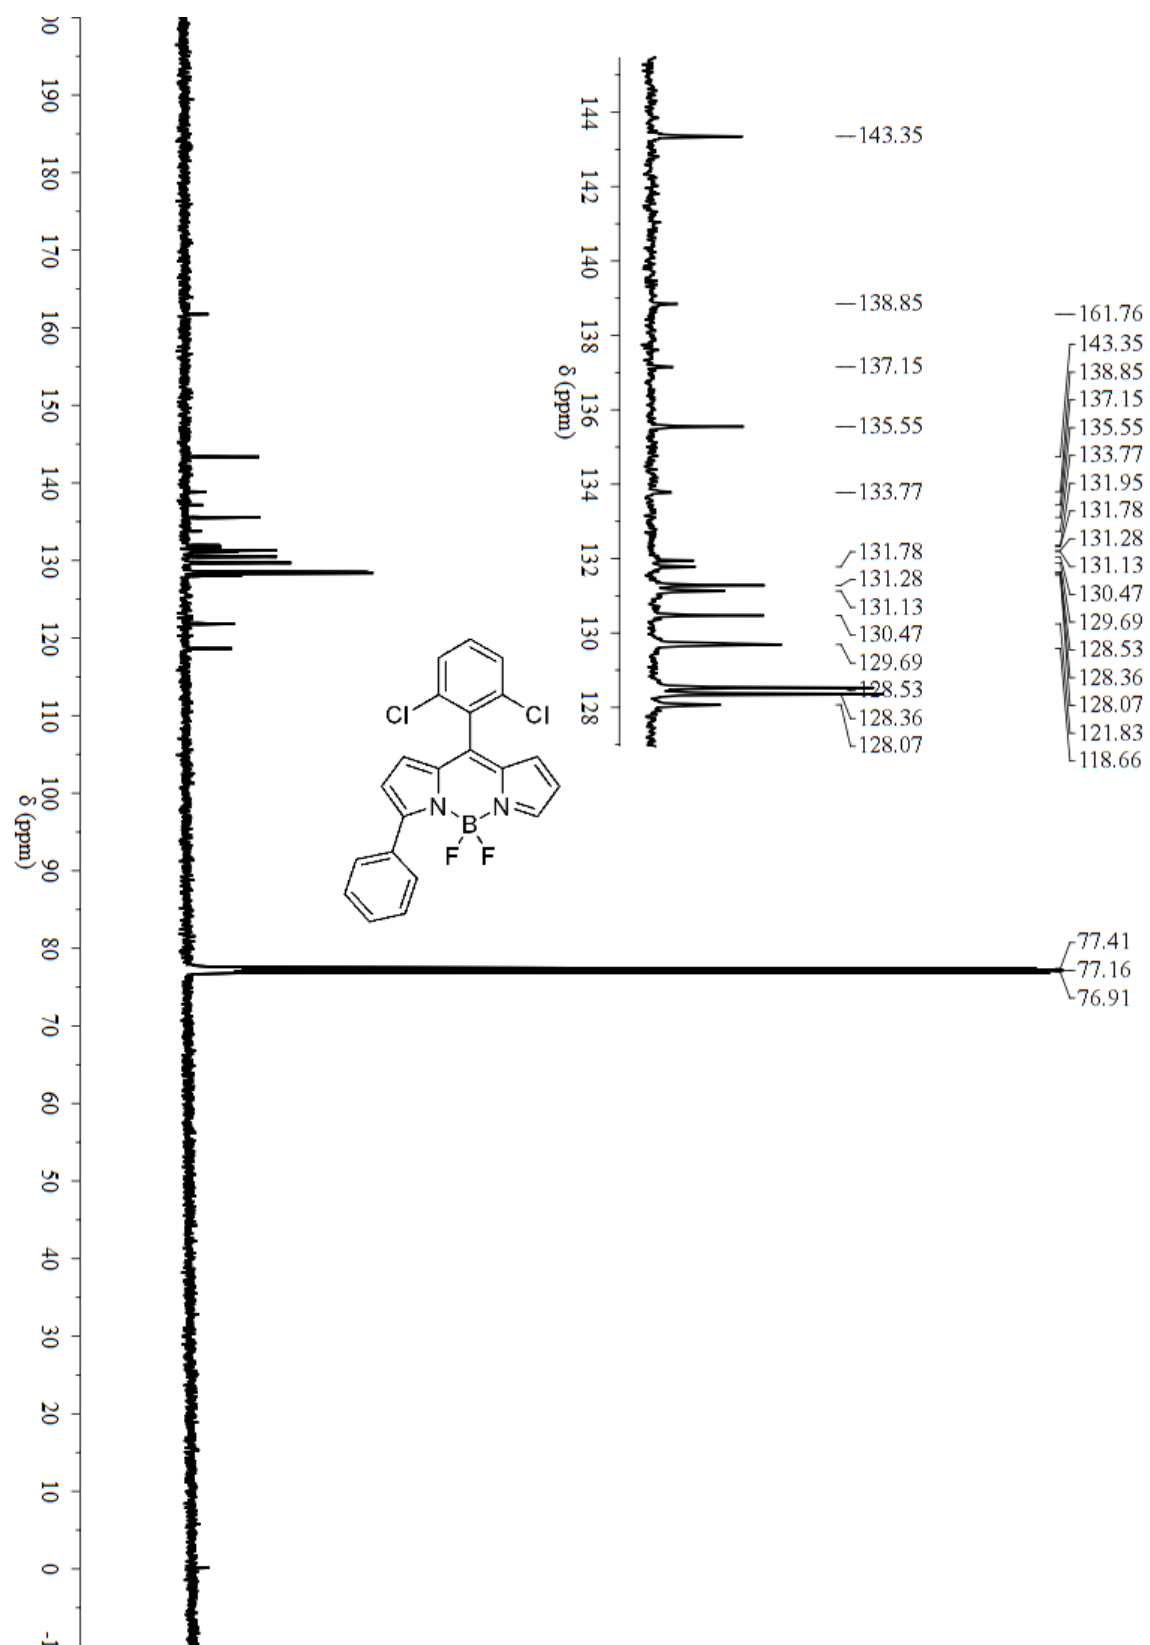

<sup>13</sup>C NMR spectrum of **3e** in CDCl<sub>3</sub>



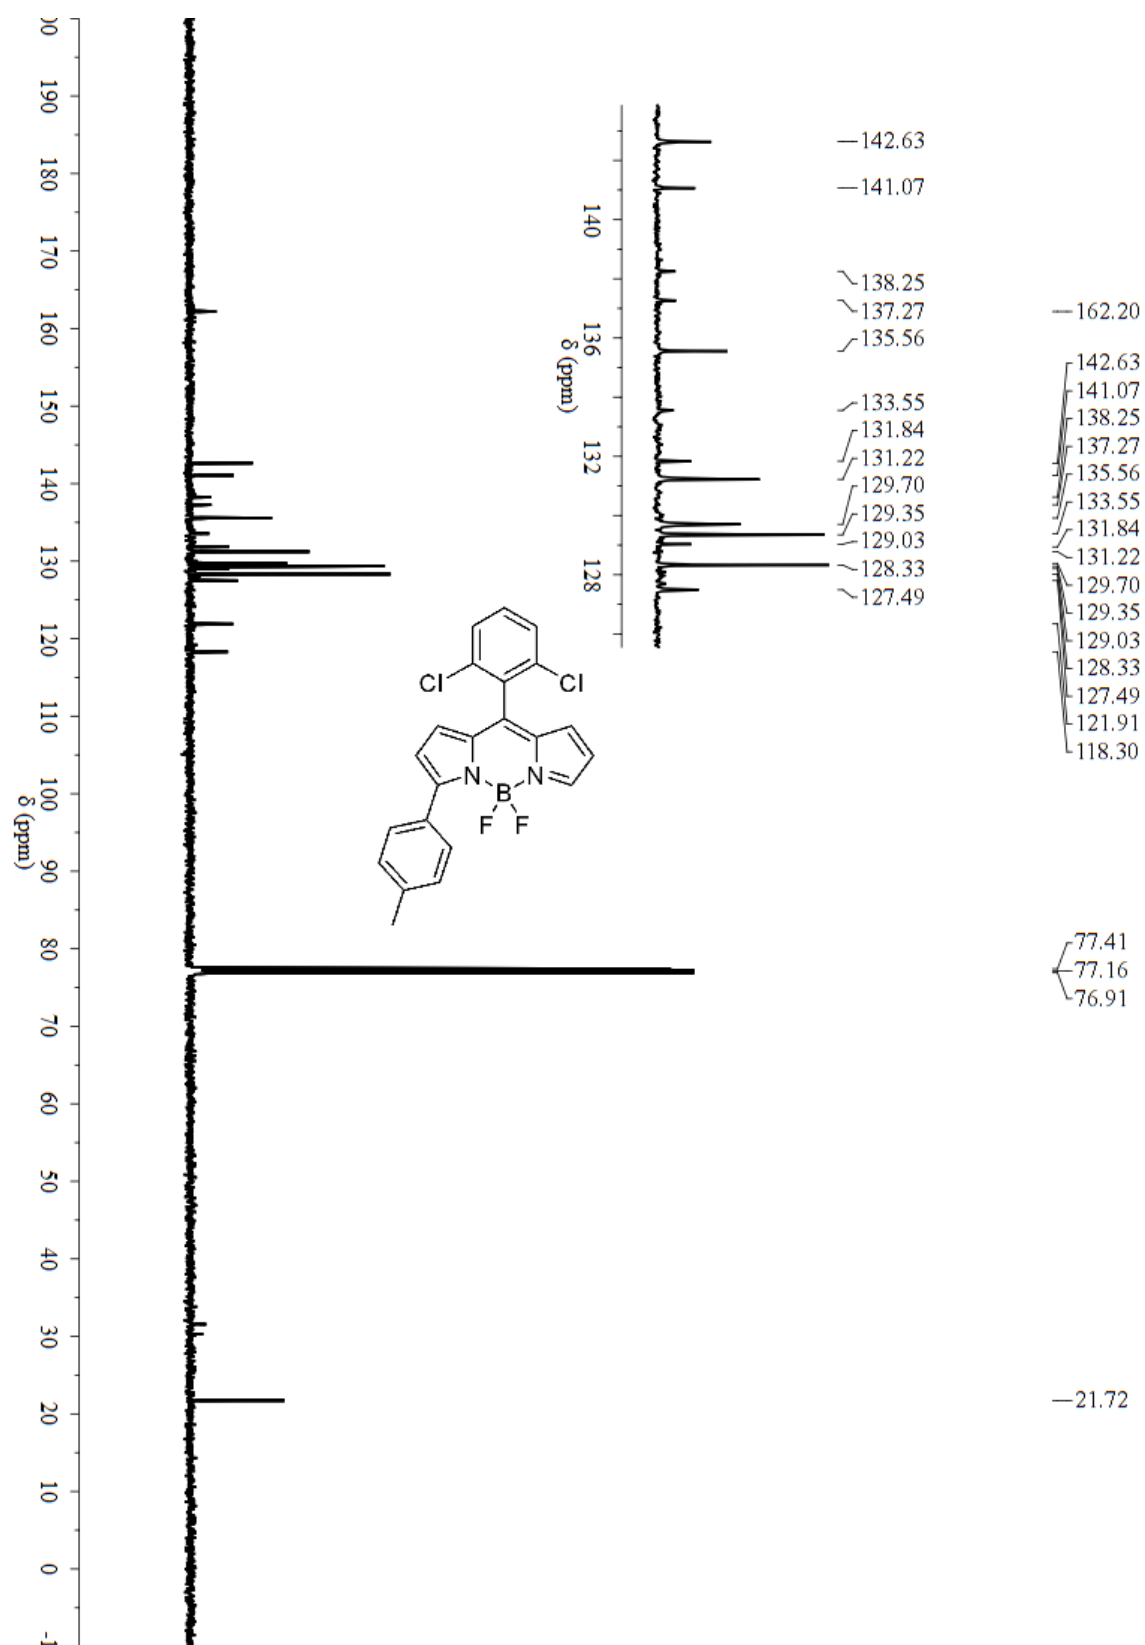

$^{13}\text{C}$  NMR spectrum of **3f** in  $\text{CDCl}_3$

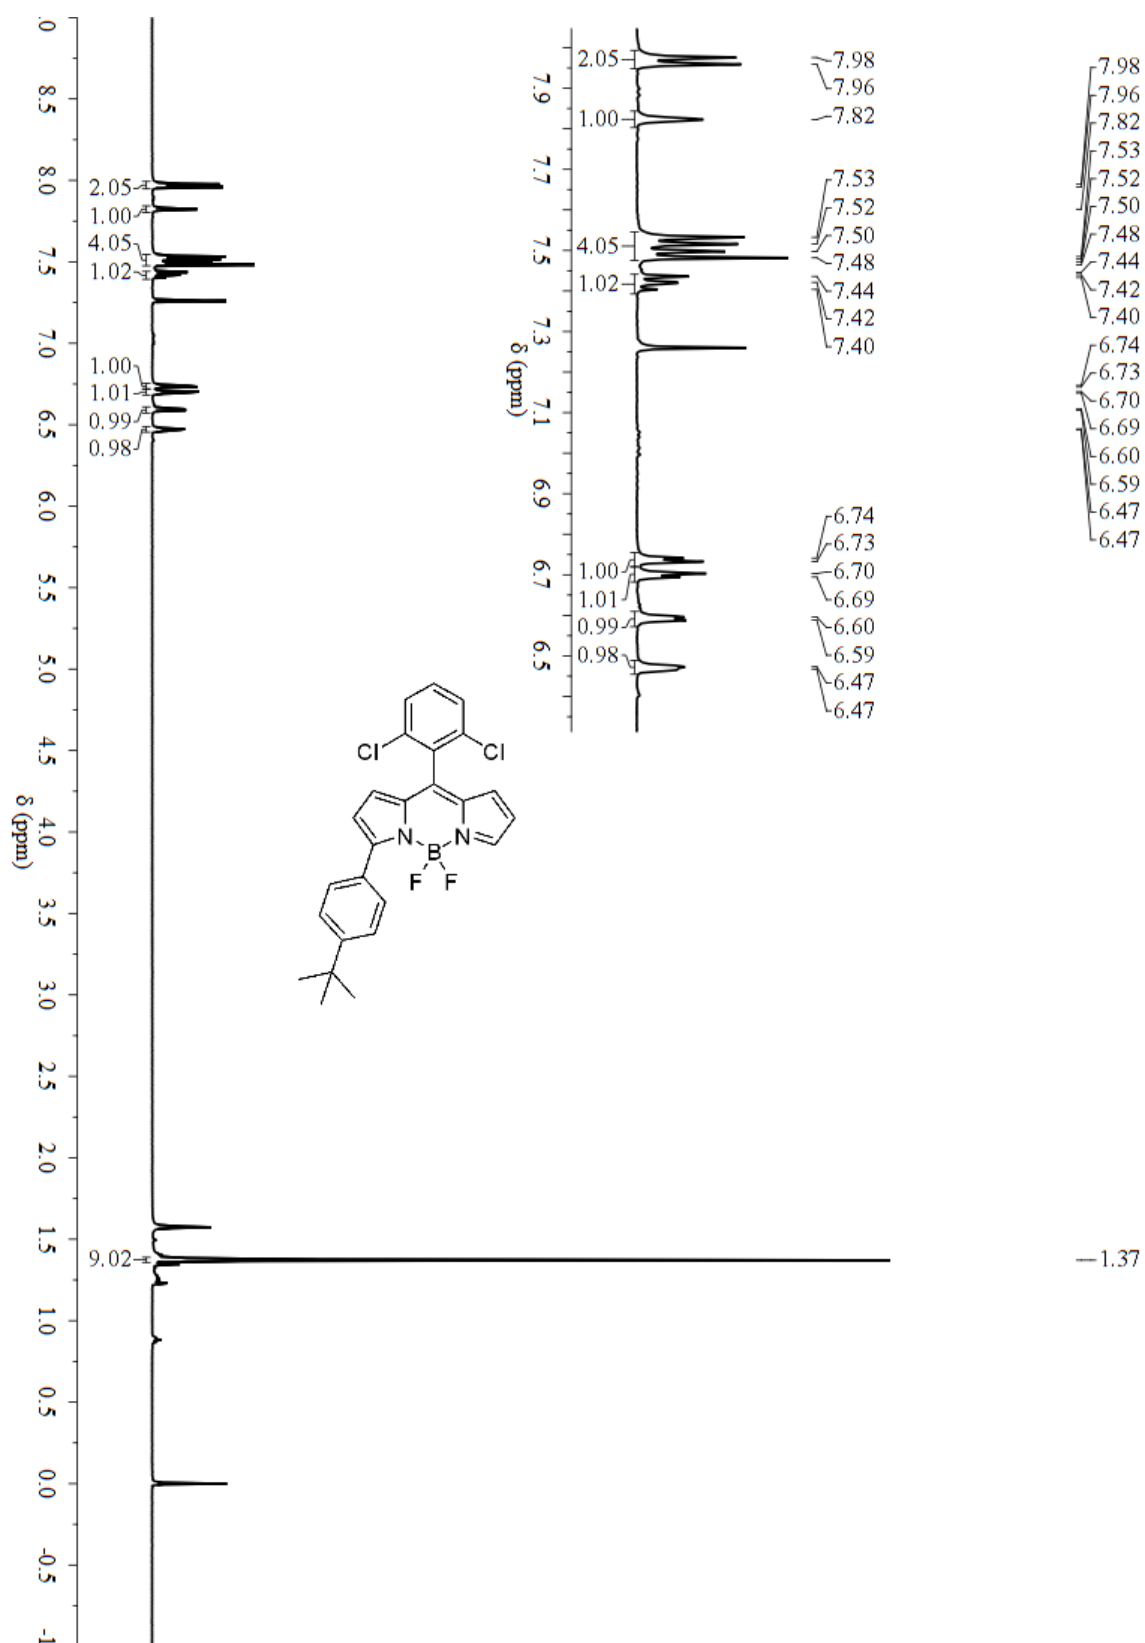

<sup>1</sup>H NMR spectrum of **3g** in CDCl<sub>3</sub>

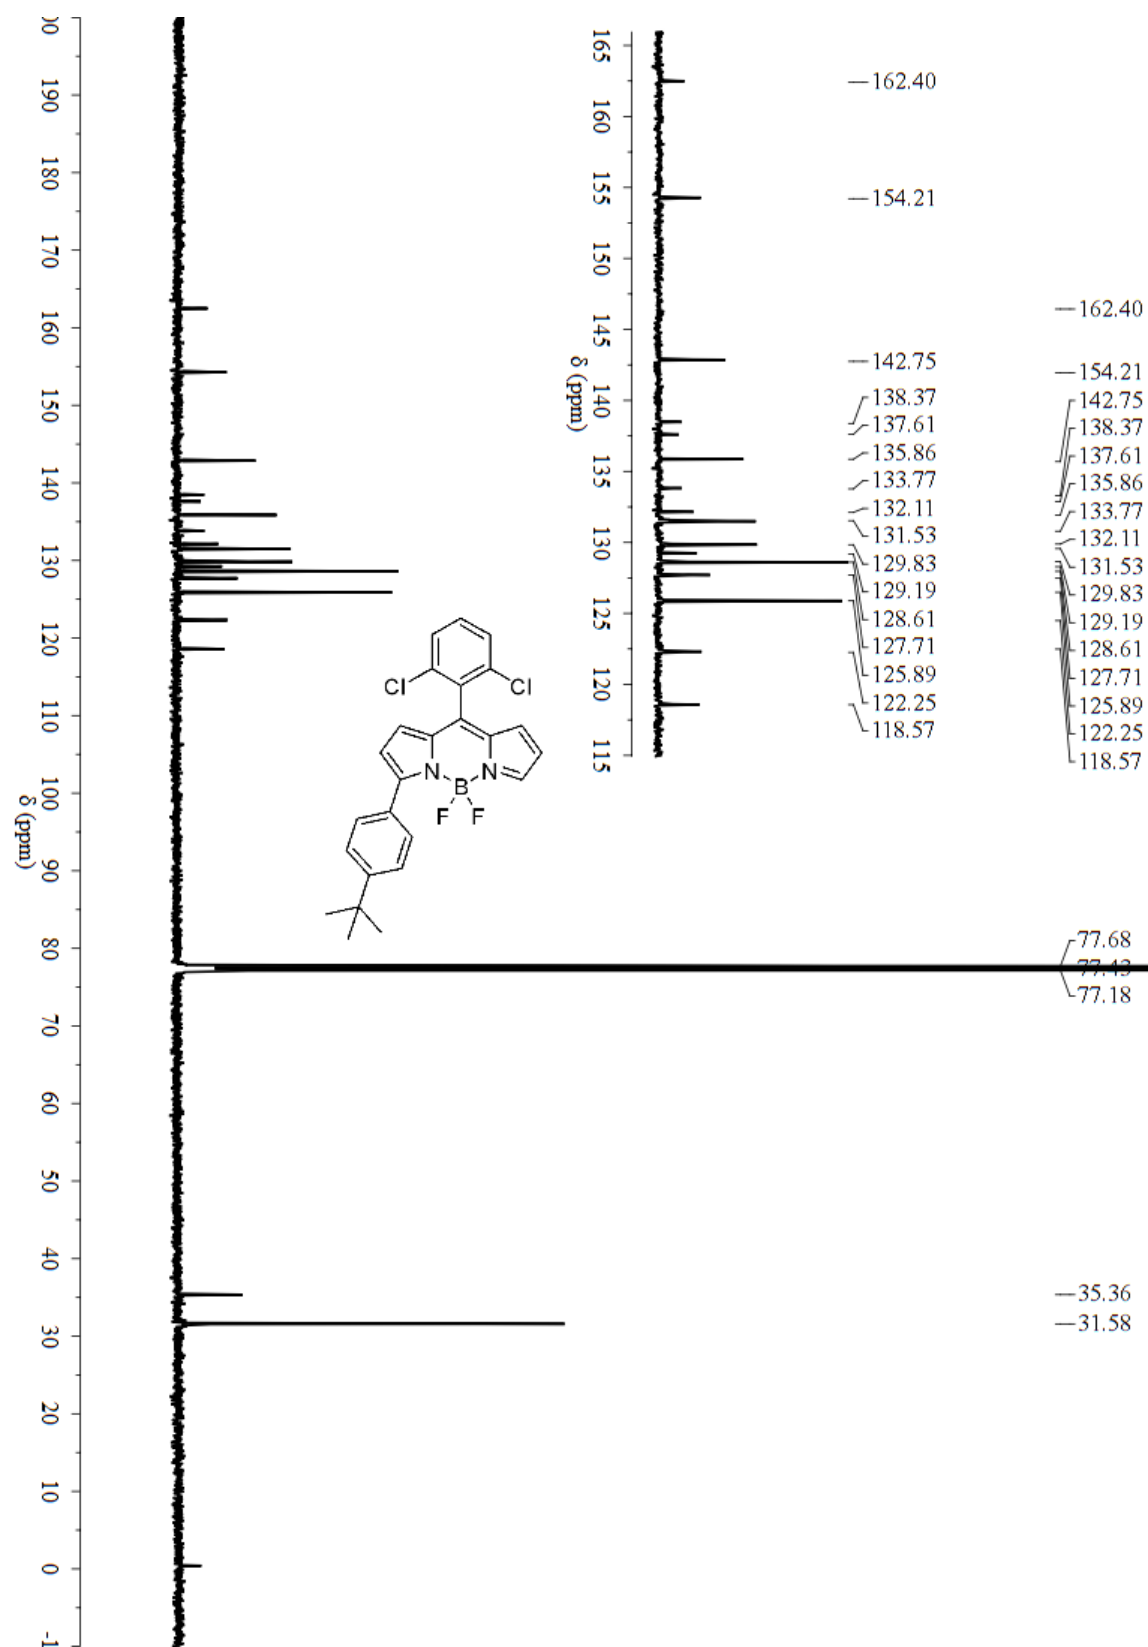

$^{13}\text{C}$  NMR spectrum of **3g** in  $\text{CDCl}_3$

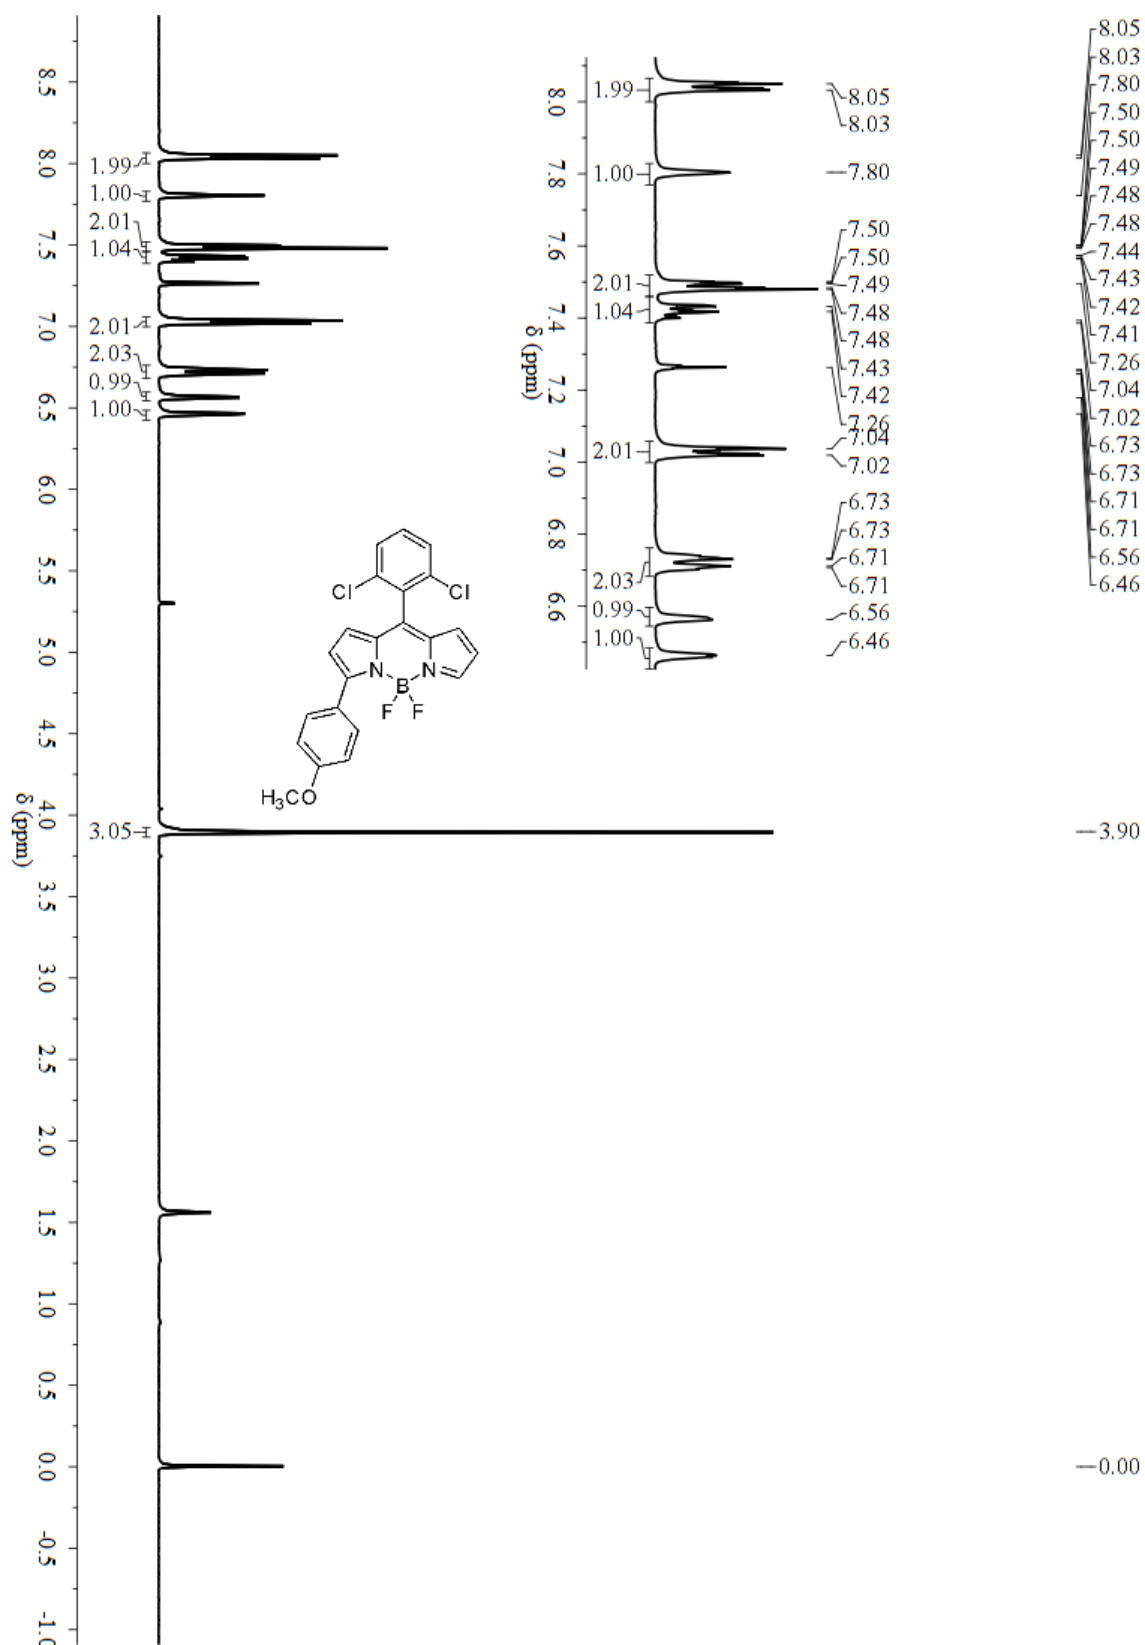

<sup>1</sup>H NMR spectrum of **3h** in CDCl<sub>3</sub>

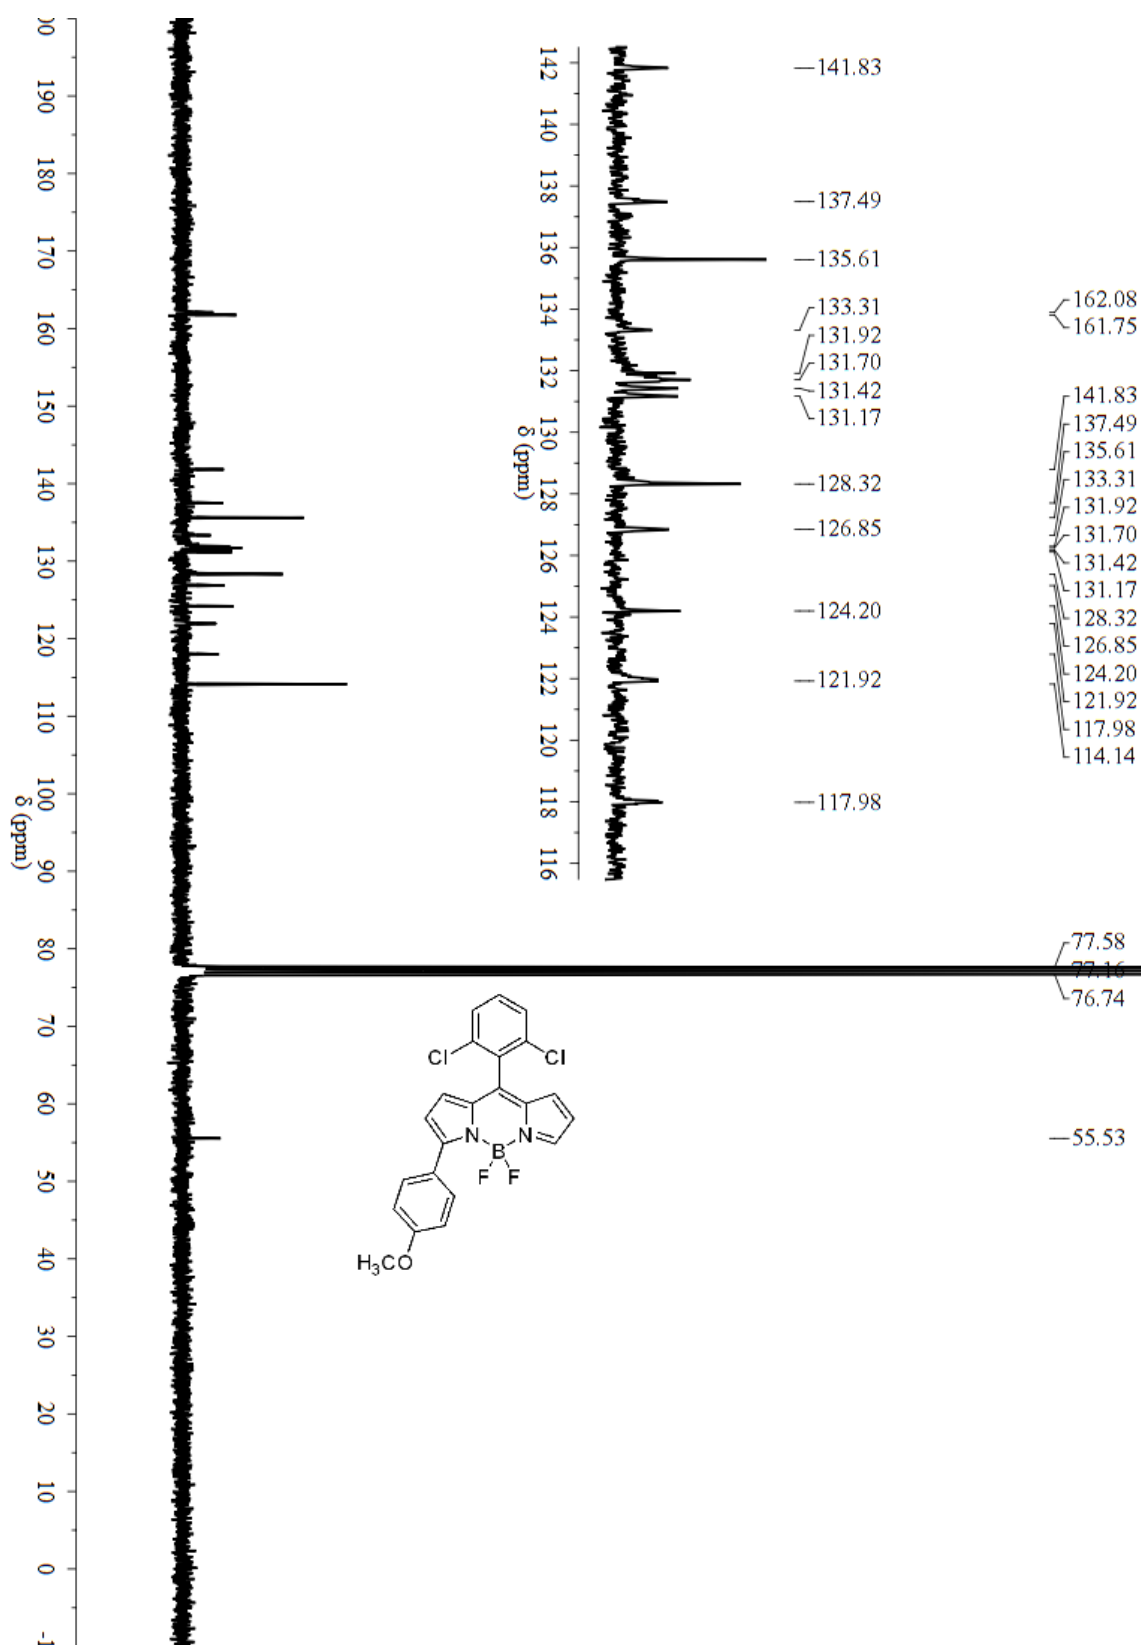

<sup>13</sup>C NMR spectrum of **3h** in CDCl<sub>3</sub>



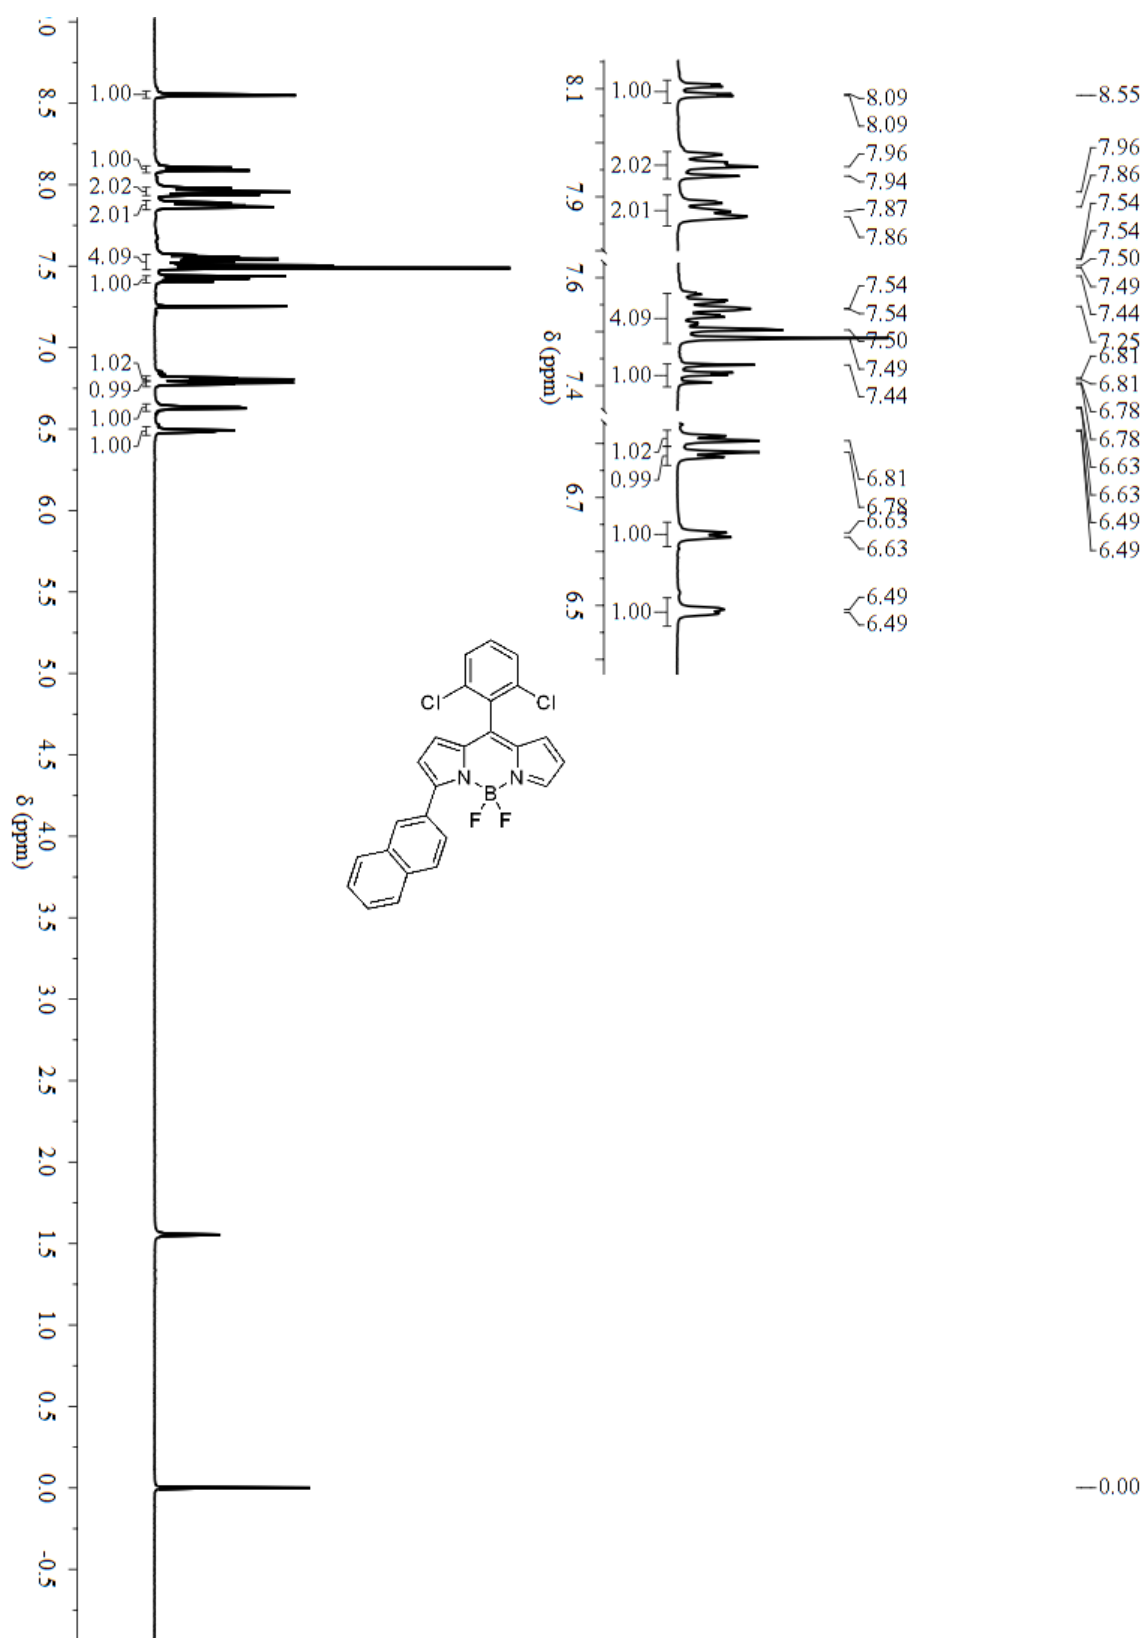

<sup>1</sup>H NMR spectrum of **3i** in CDCl<sub>3</sub>

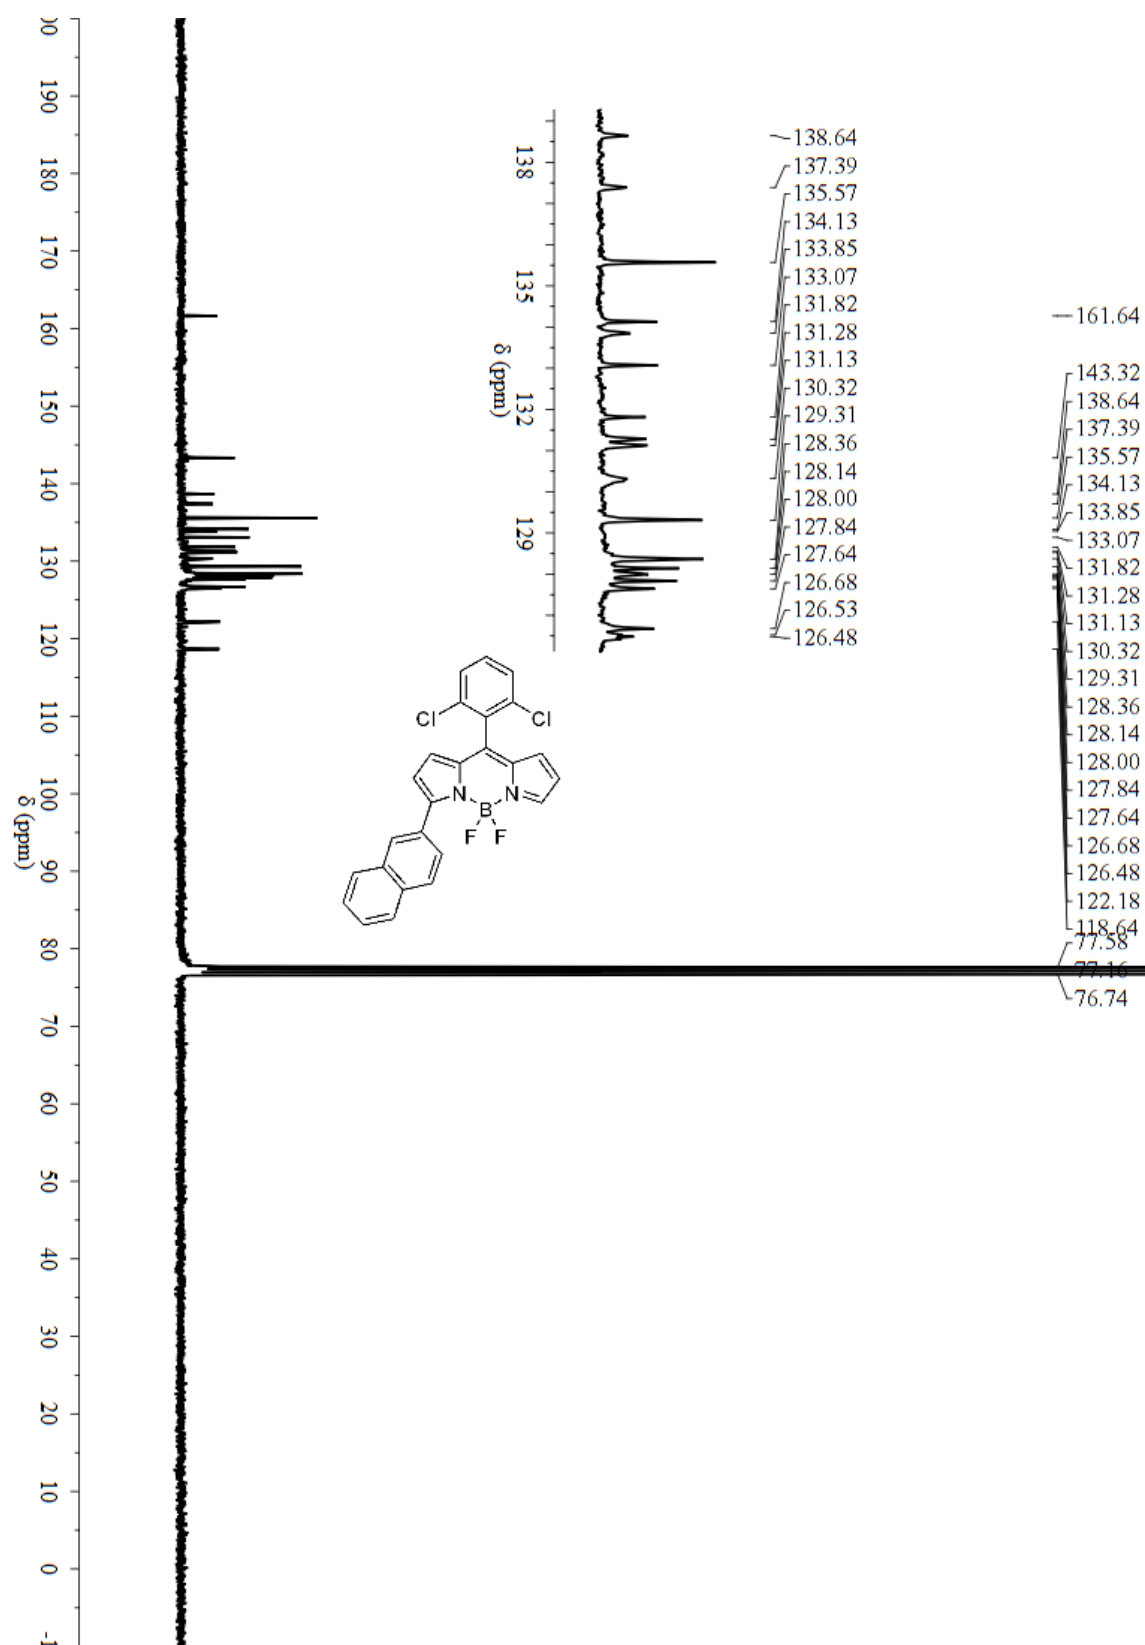

<sup>13</sup>C NMR spectrum of **3i** in CDCl<sub>3</sub>.

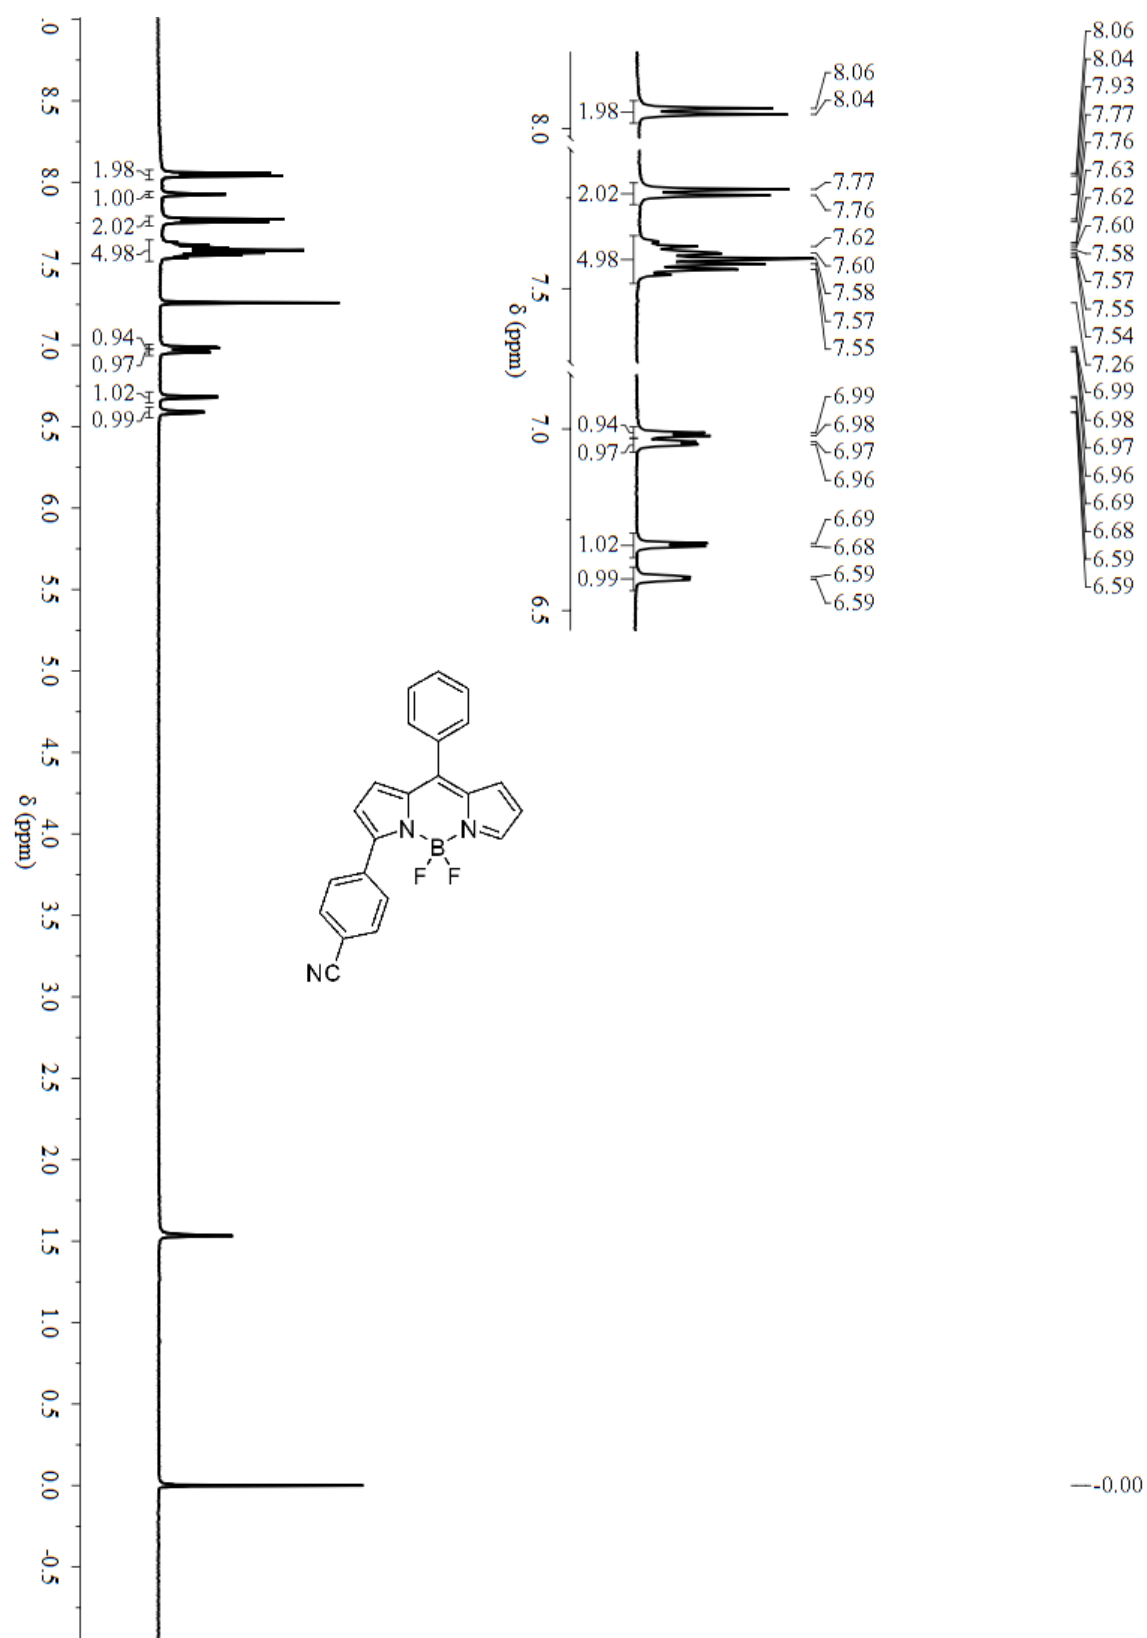

<sup>1</sup>H NMR spectrum of **3j** in CDCl<sub>3</sub>

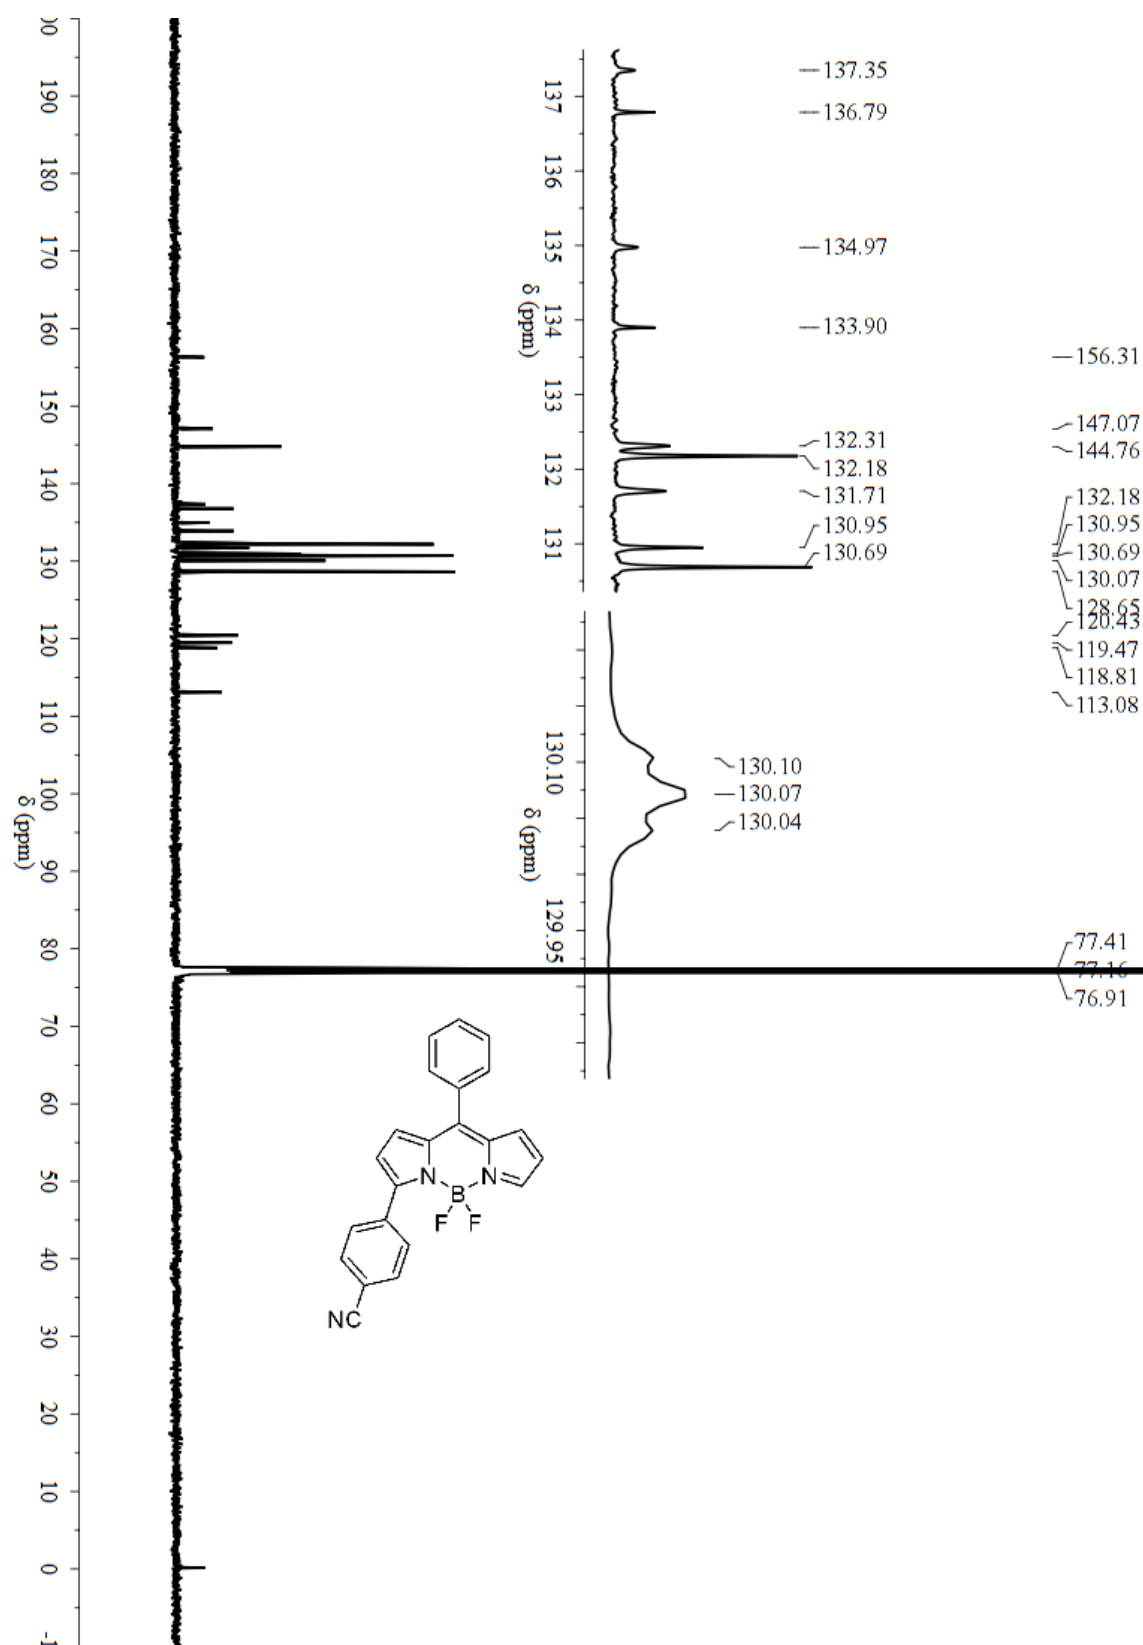

<sup>13</sup>C NMR spectrum of **3j** in CDCl<sub>3</sub>

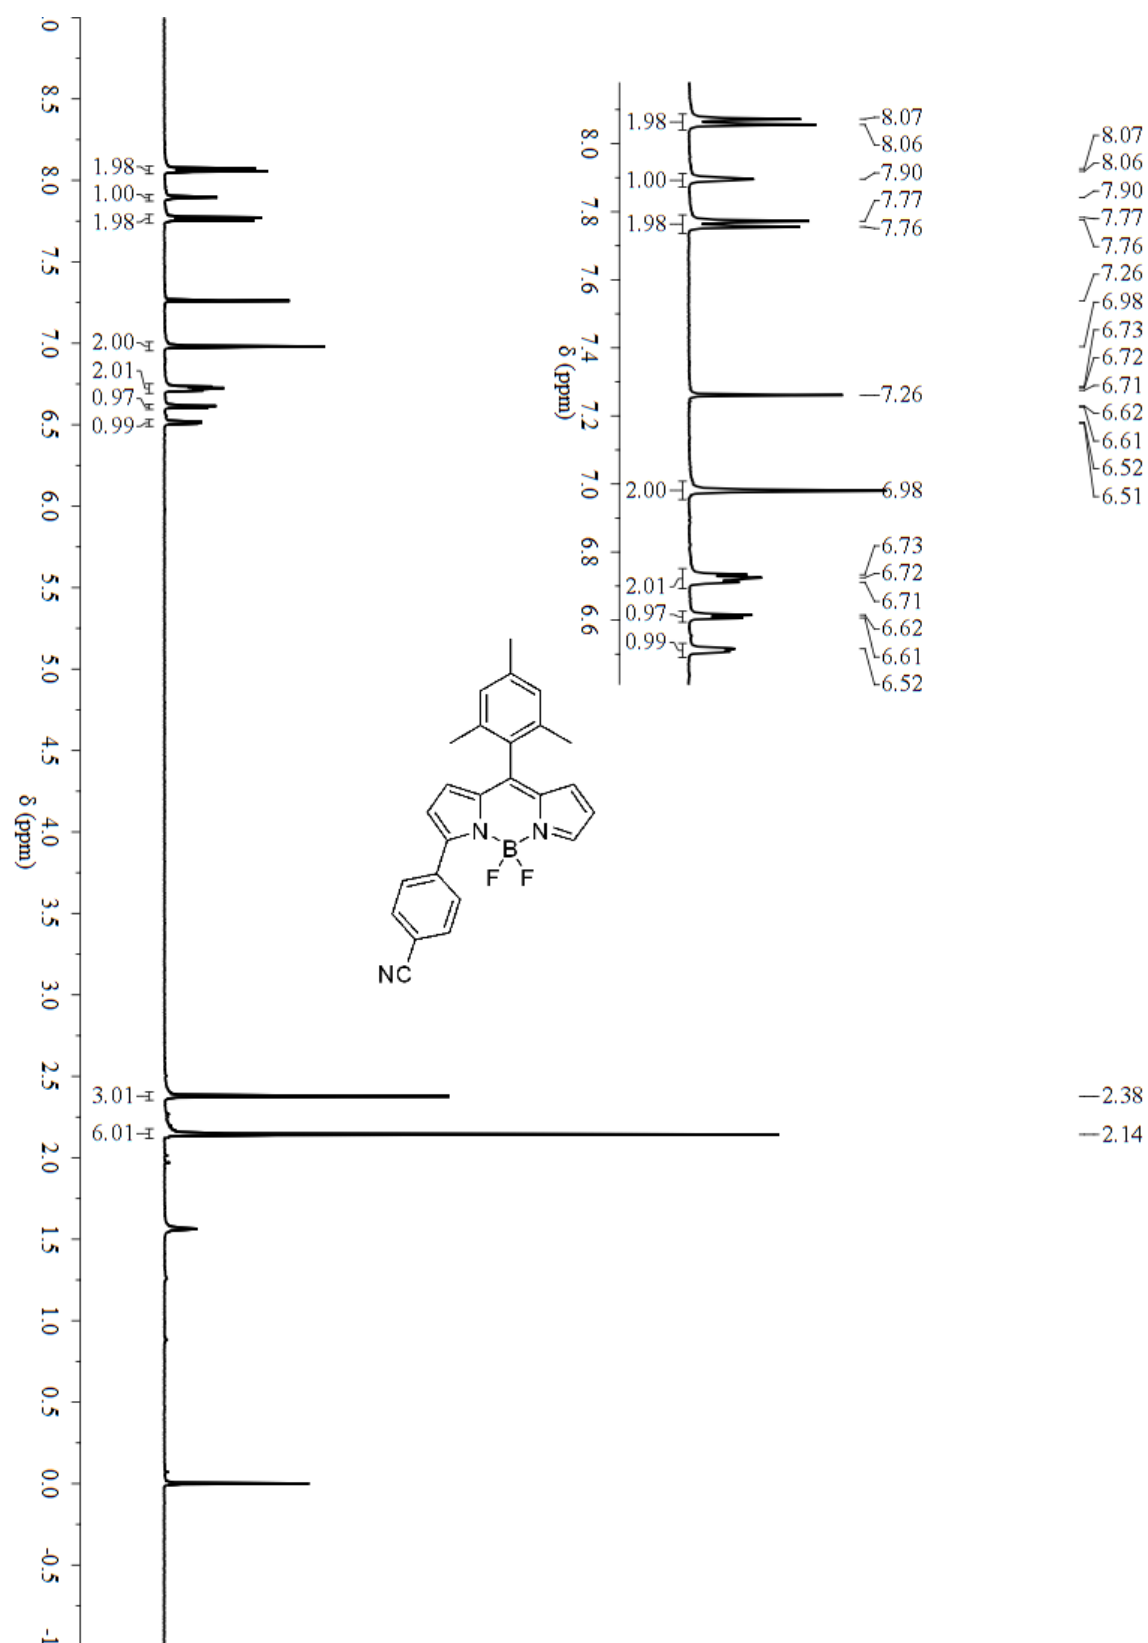

<sup>1</sup>H NMR spectrum of **3k** in CDCl<sub>3</sub>

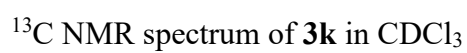

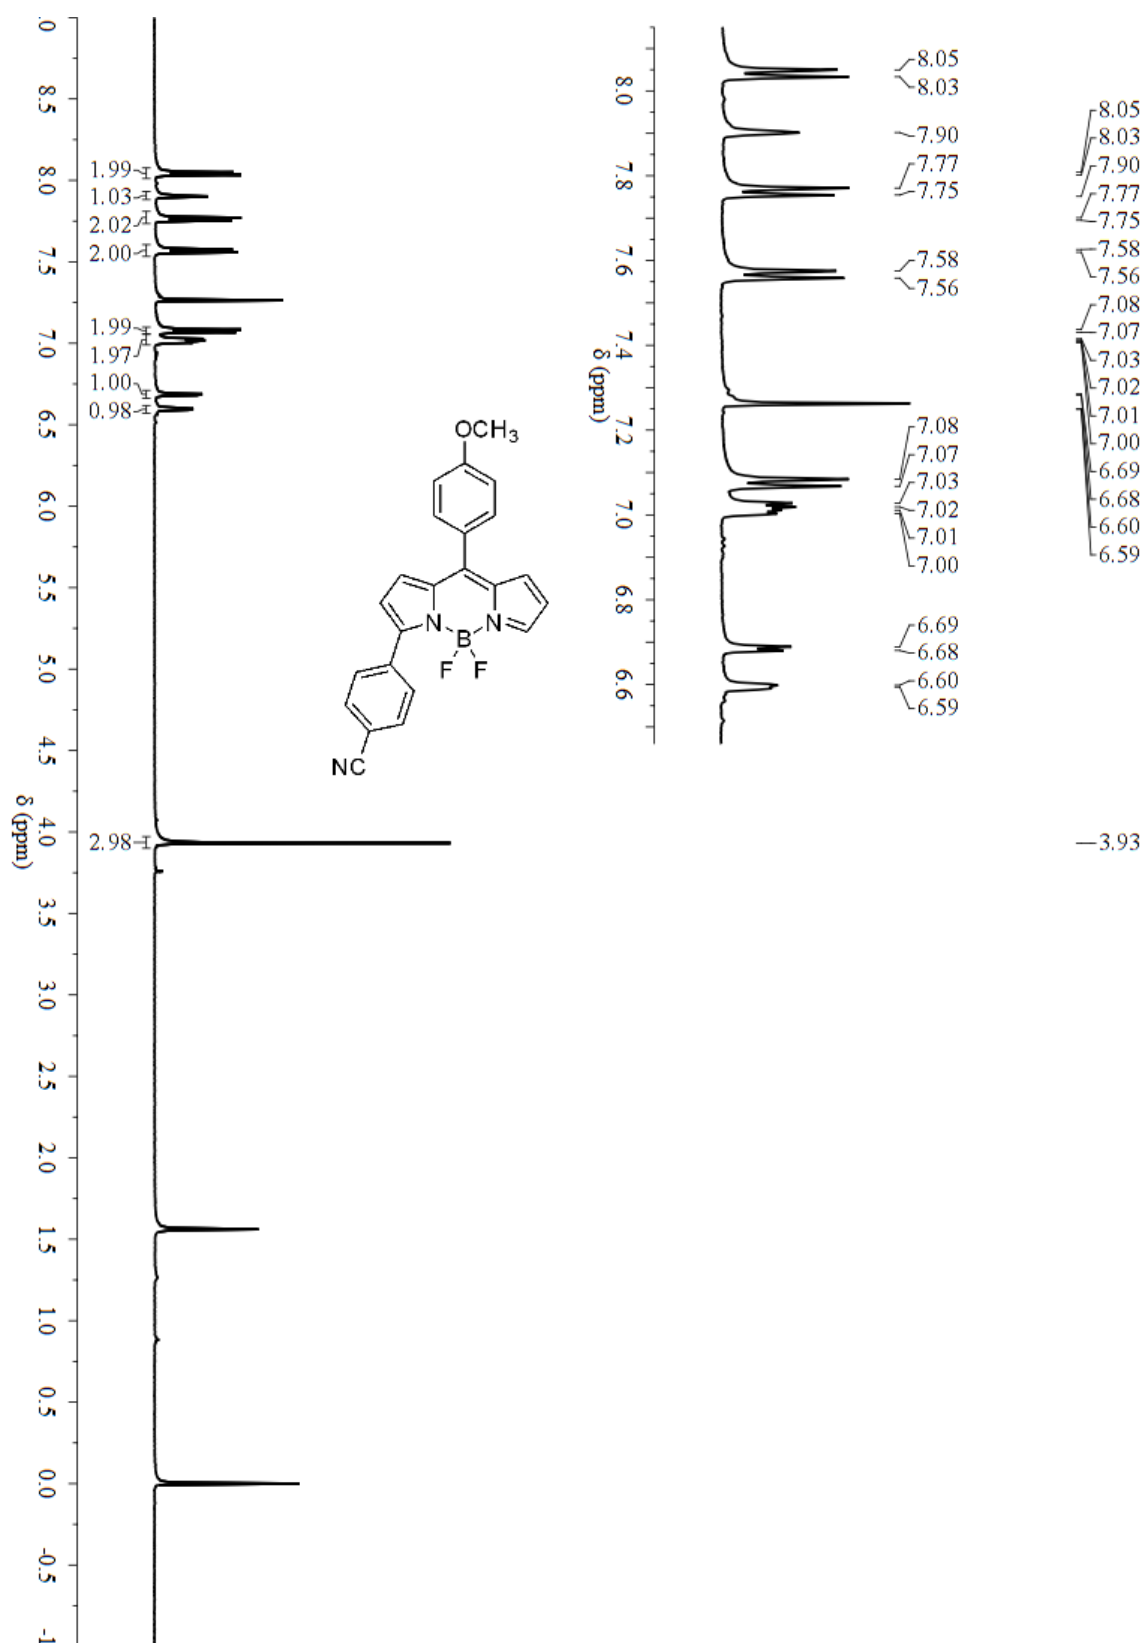

<sup>1</sup>H NMR spectrum of **3l** in CDCl<sub>3</sub>

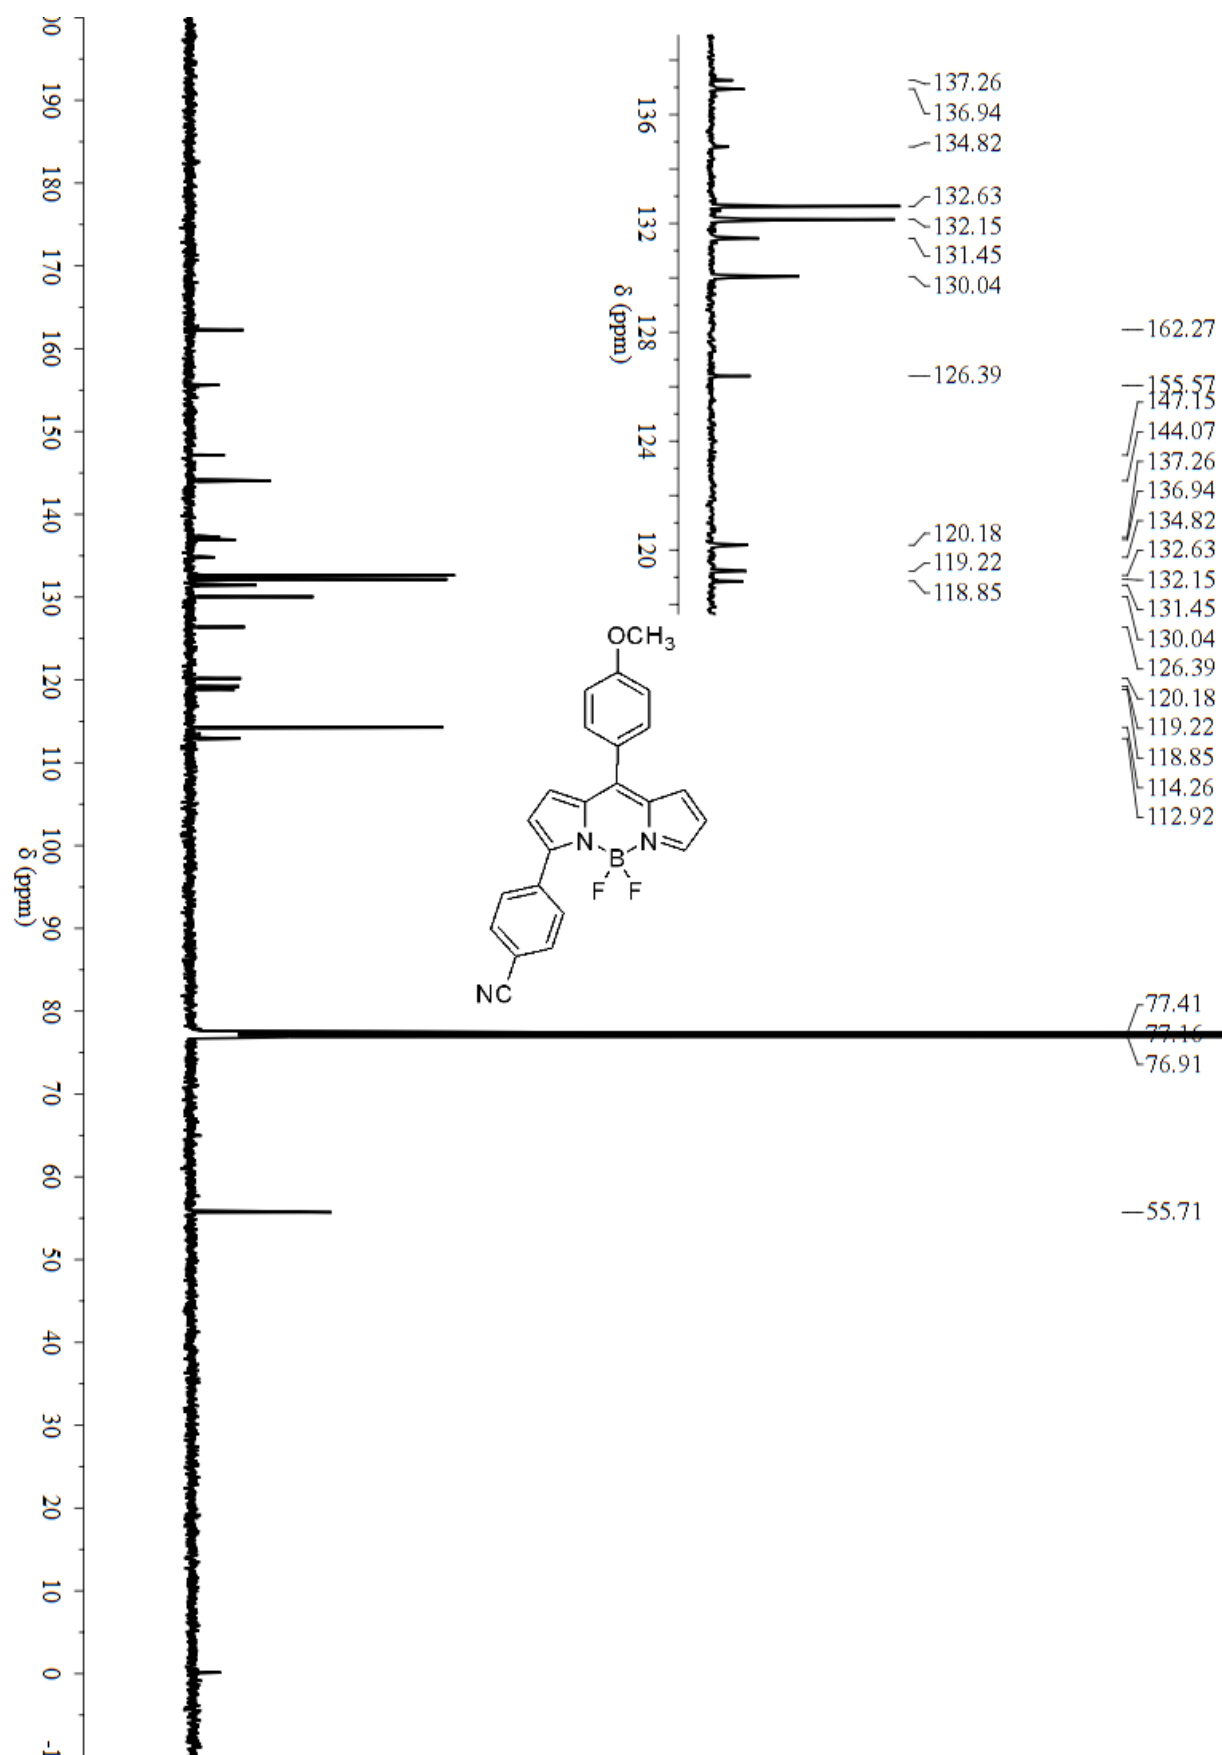

<sup>13</sup>C NMR spectrum of **31** in CDCl<sub>3</sub>



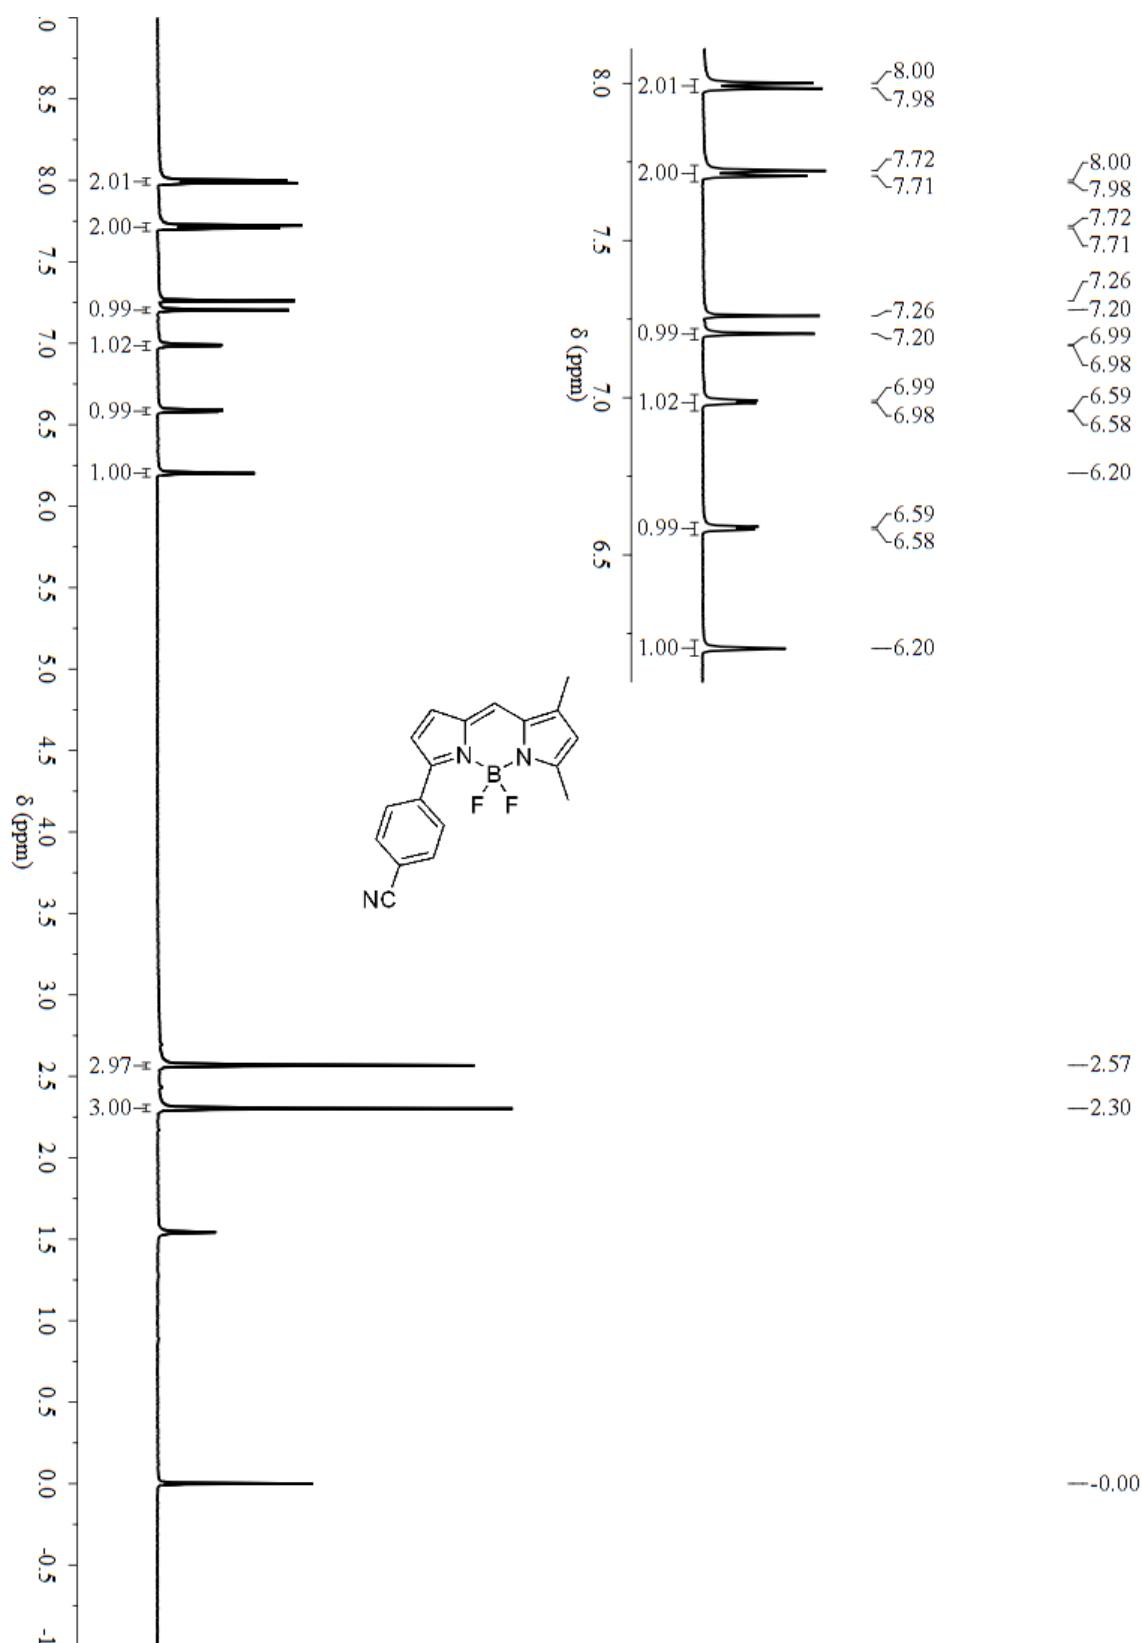

<sup>1</sup>H NMR spectrum of **3m** in CDCl<sub>3</sub>

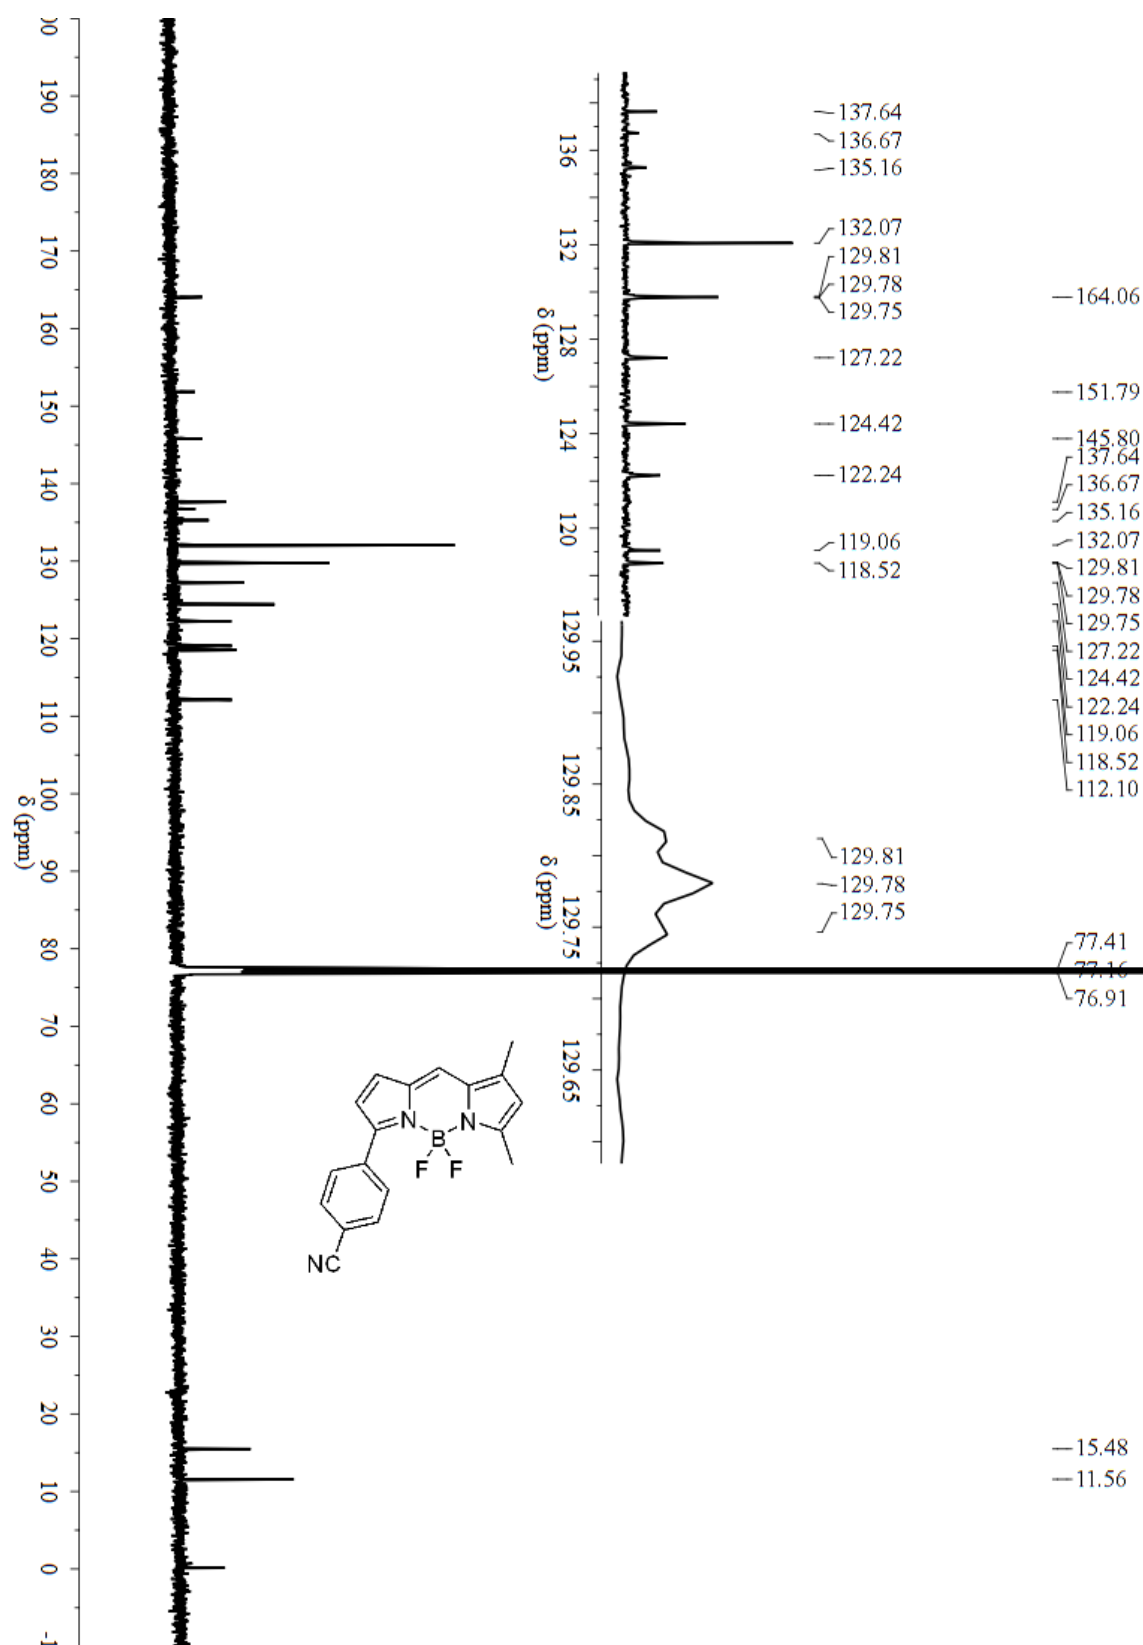

$^{13}\text{C}$  NMR spectrum of **3m** in  $\text{CDCl}_3$

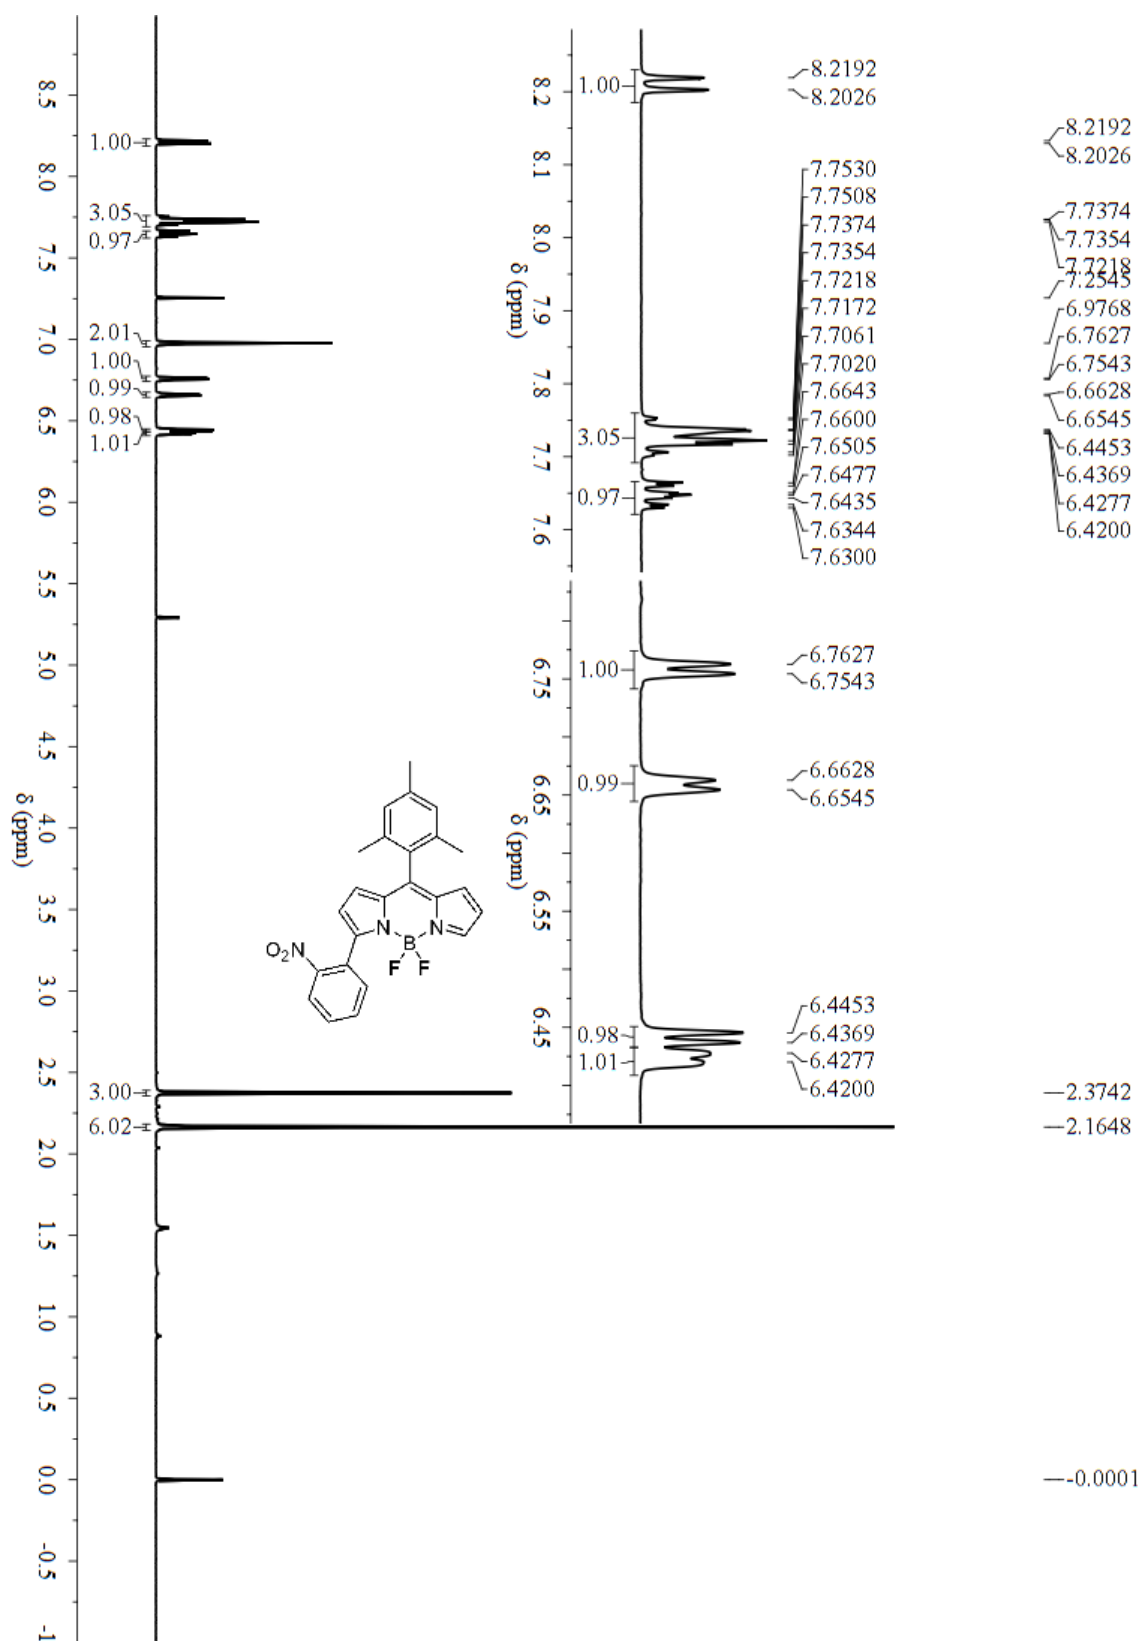

<sup>1</sup>H NMR spectrum of **3n** in CDCl<sub>3</sub>

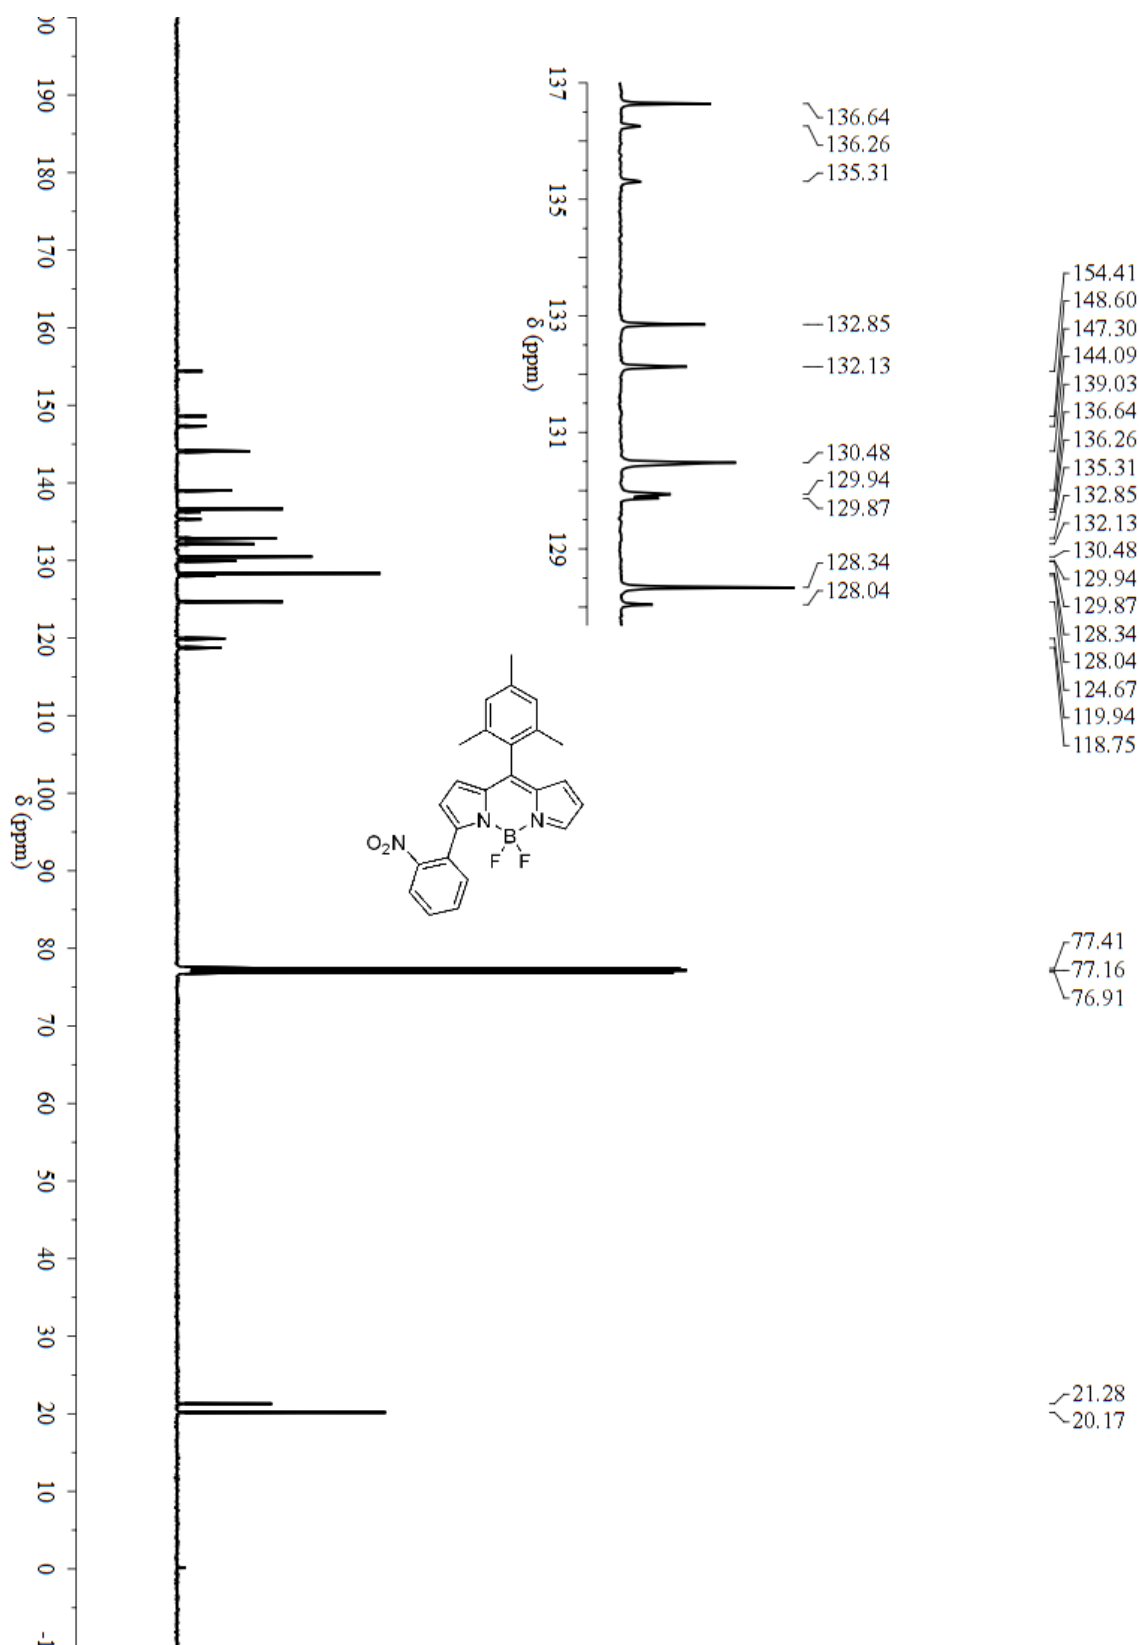

<sup>13</sup>C NMR spectrum of **3n** in CDCl<sub>3</sub>

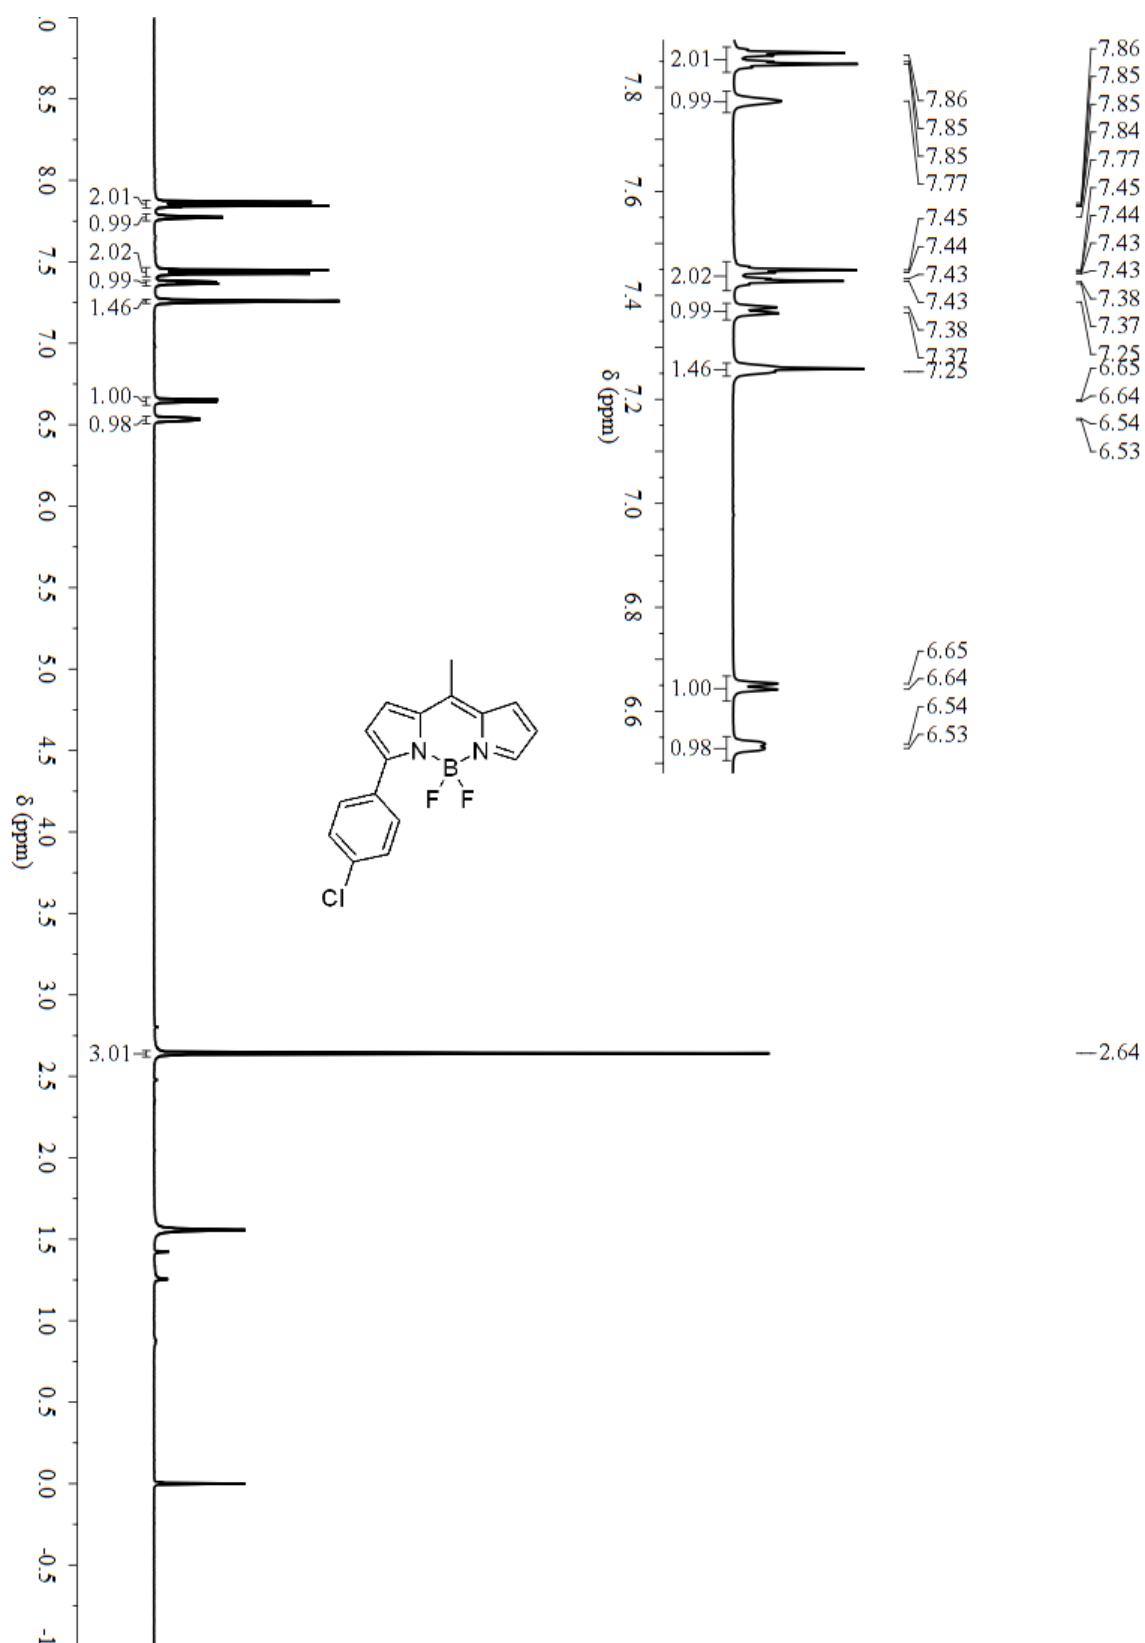

<sup>1</sup>H NMR spectrum of **30** in CDCl<sub>3</sub>

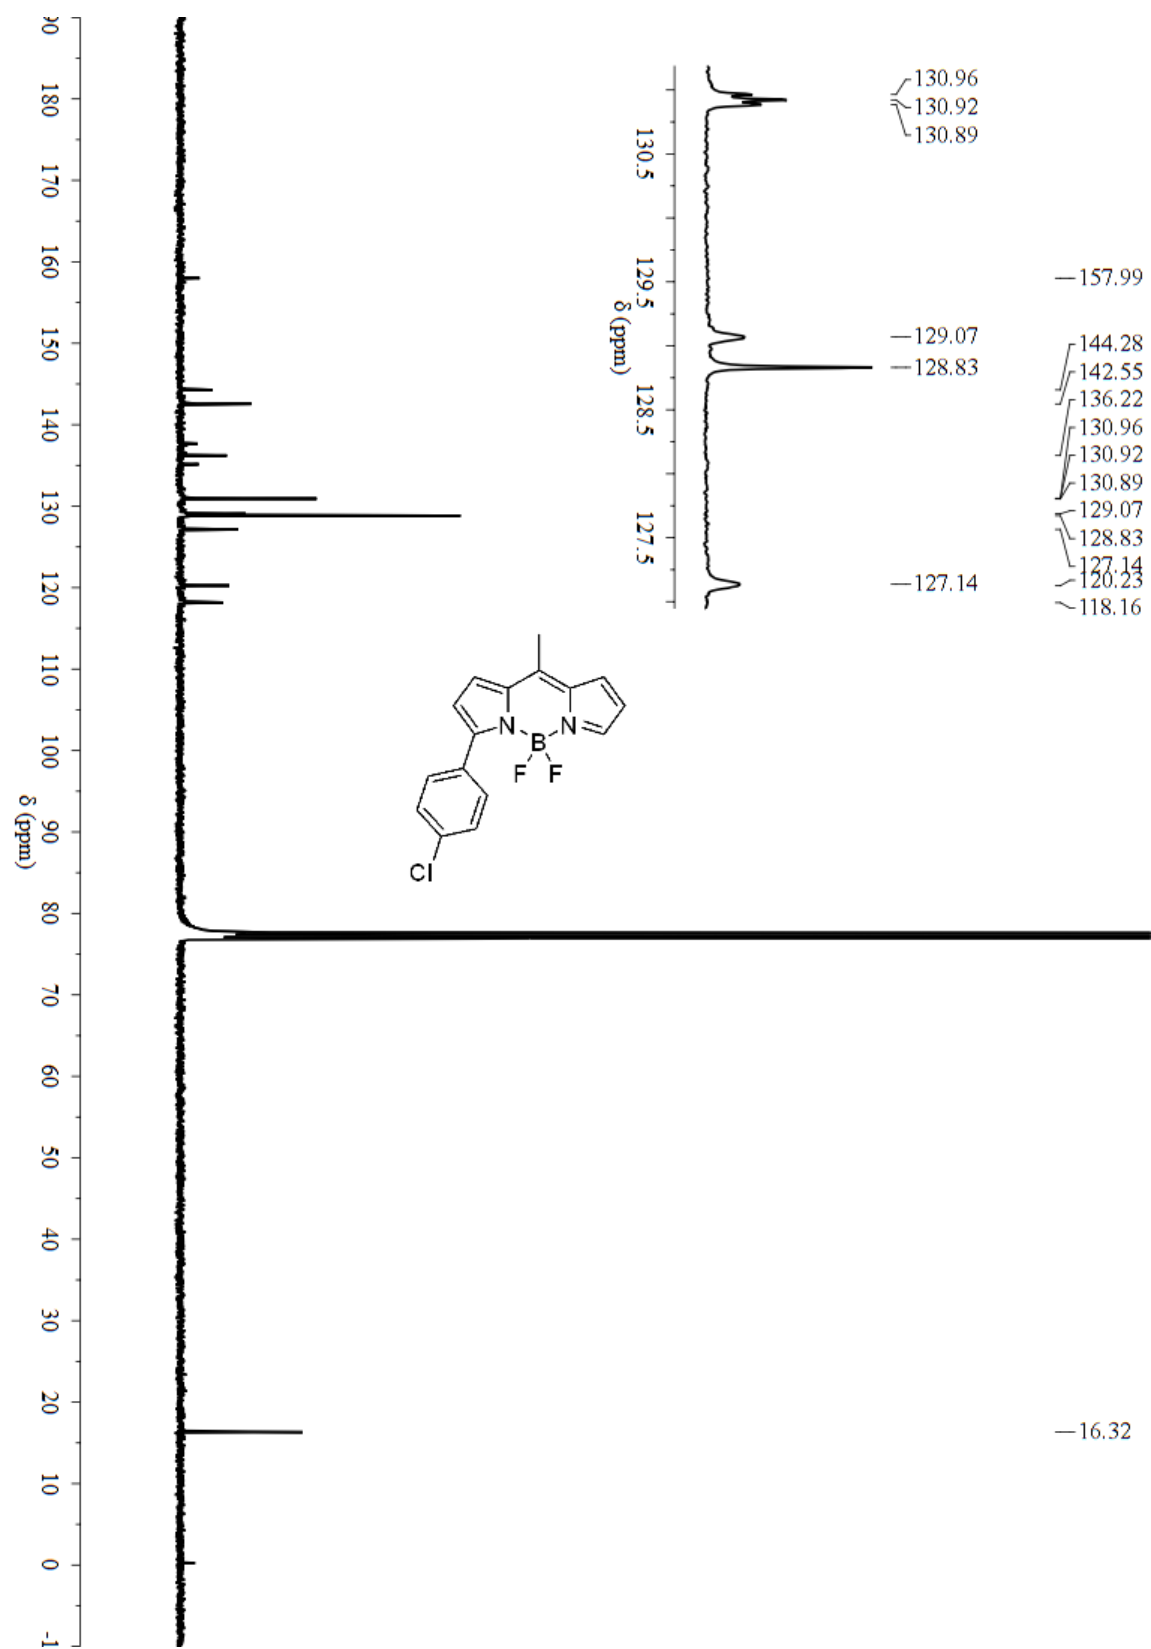

<sup>13</sup>C NMR spectrum of **3o** in CDCl<sub>3</sub>

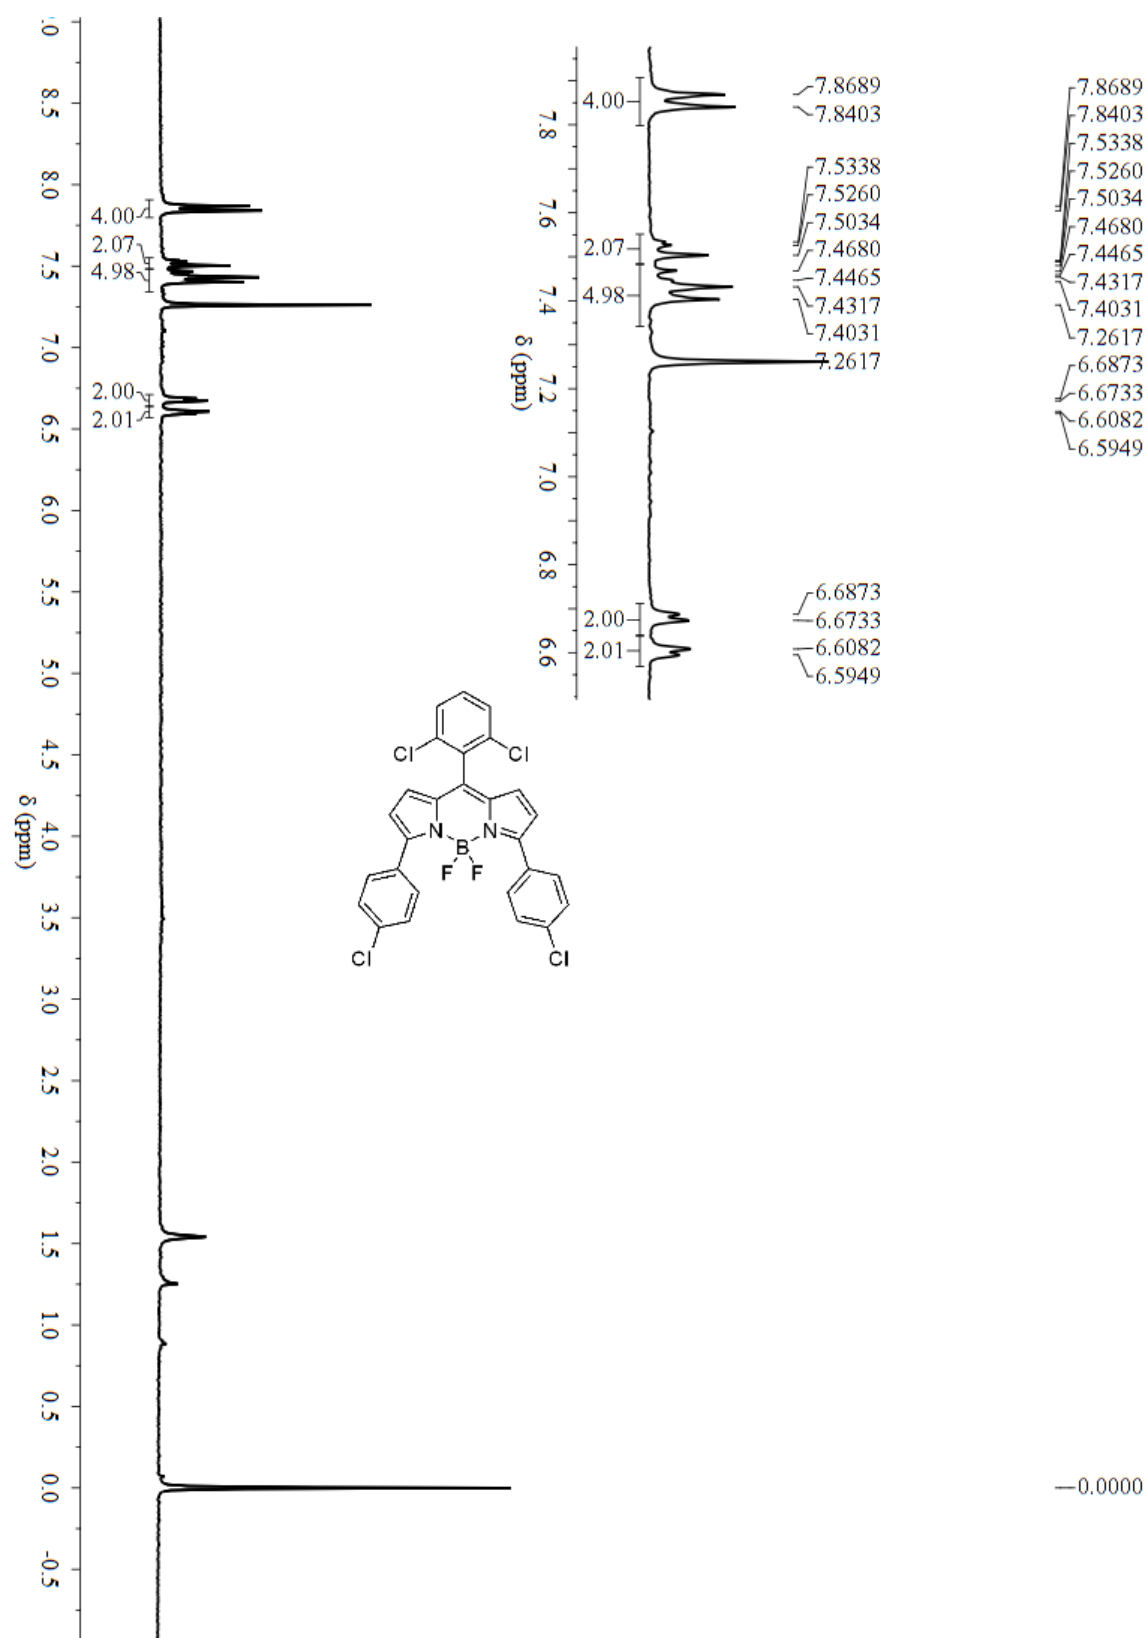

<sup>1</sup>H NMR spectrum of **4a** in CDCl<sub>3</sub>

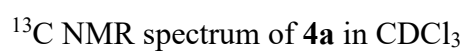



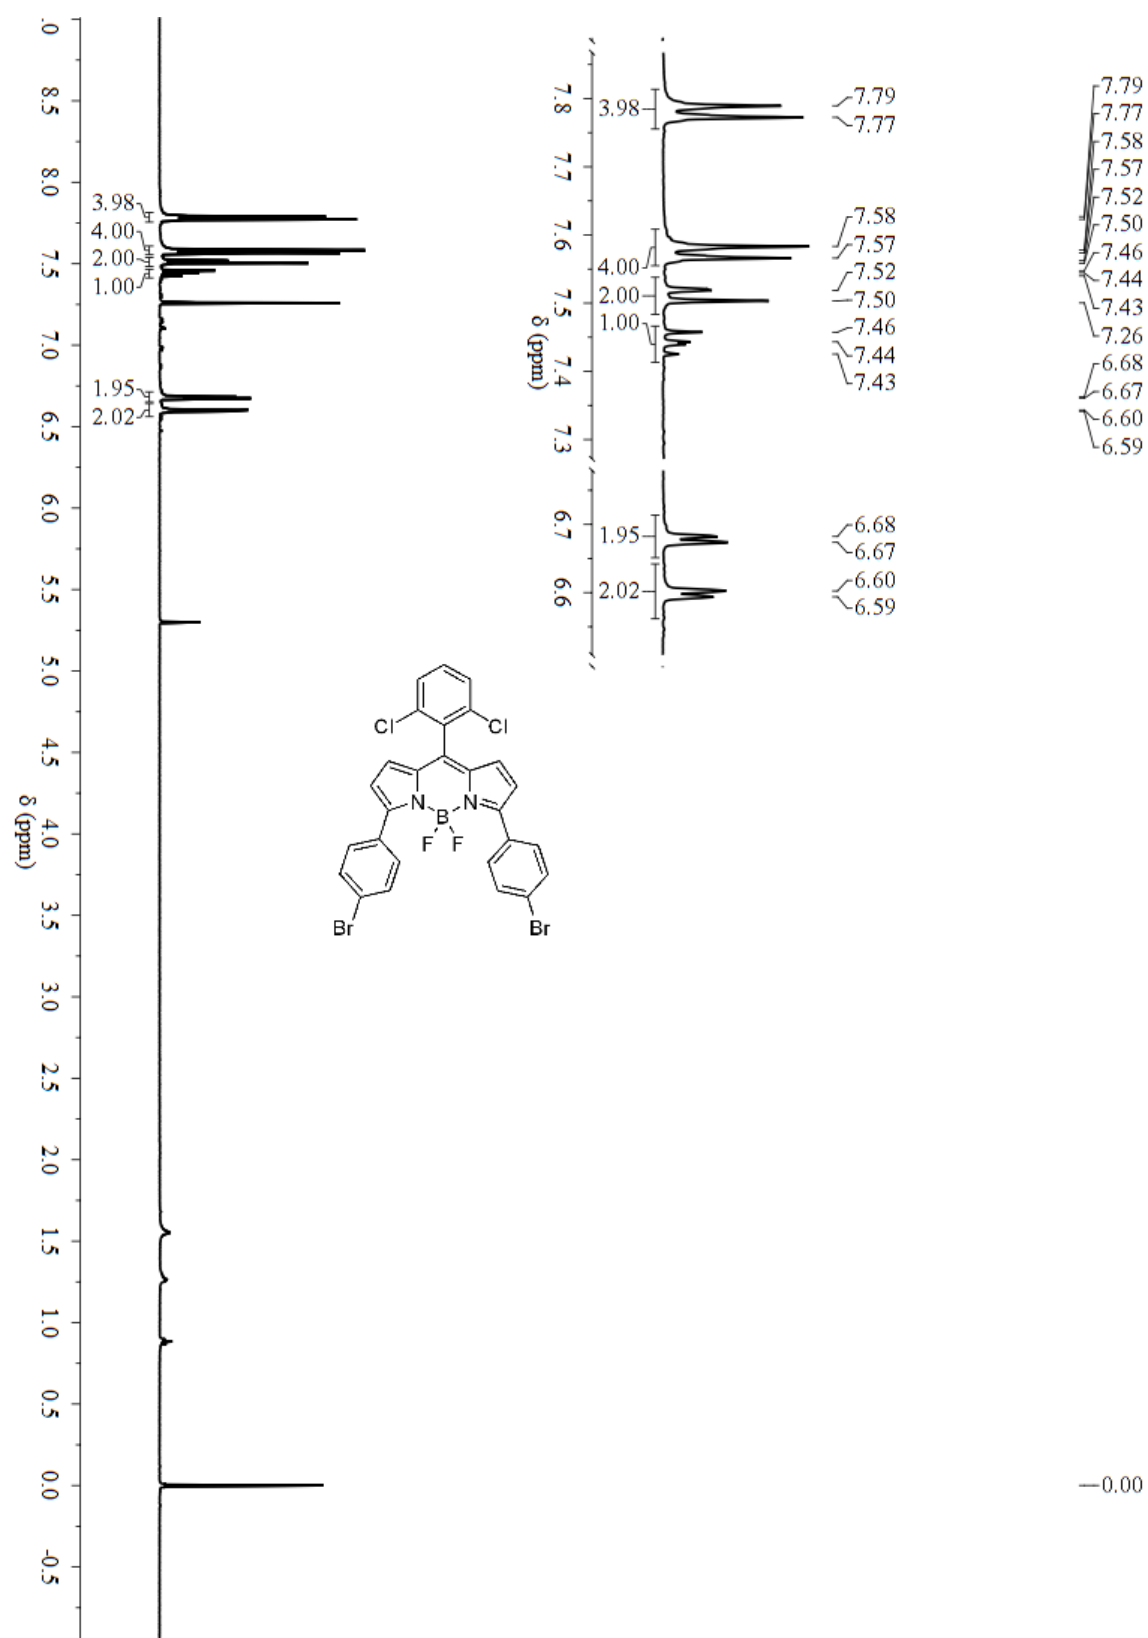

<sup>1</sup>H NMR spectrum of **4b** in CDCl<sub>3</sub>

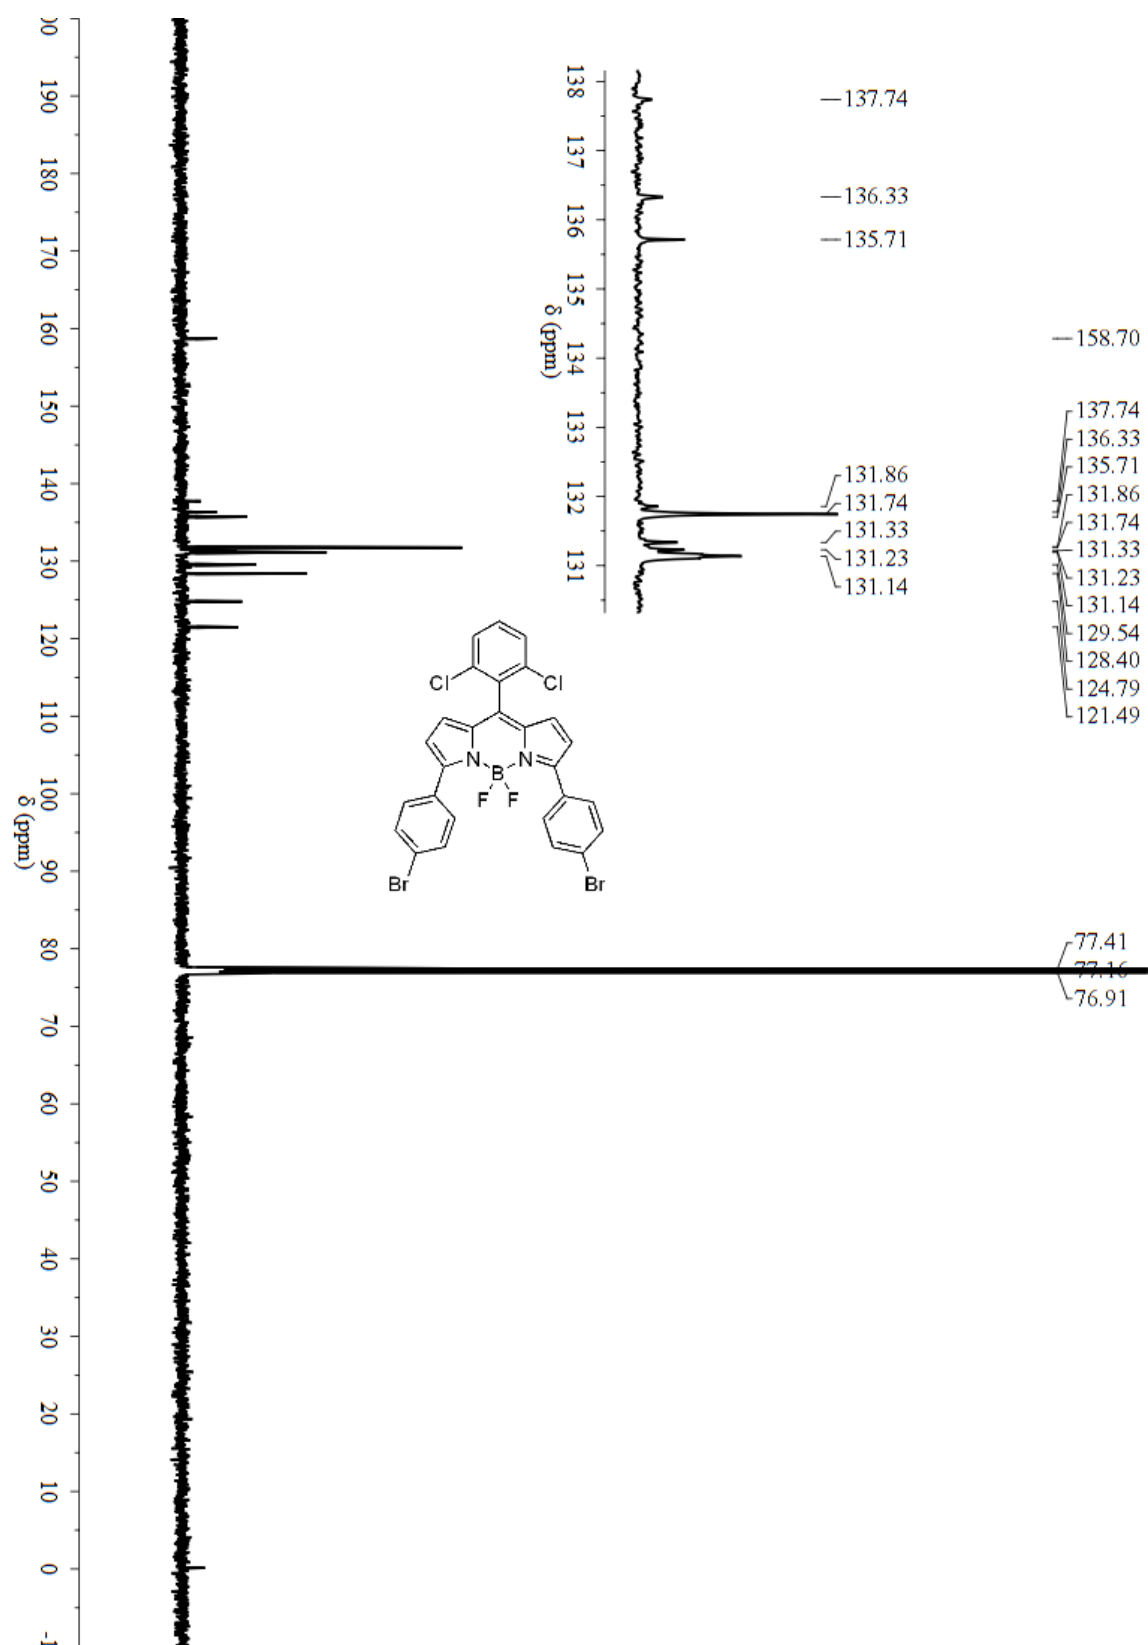

<sup>13</sup>C NMR spectrum of **4b** in CDCl<sub>3</sub>

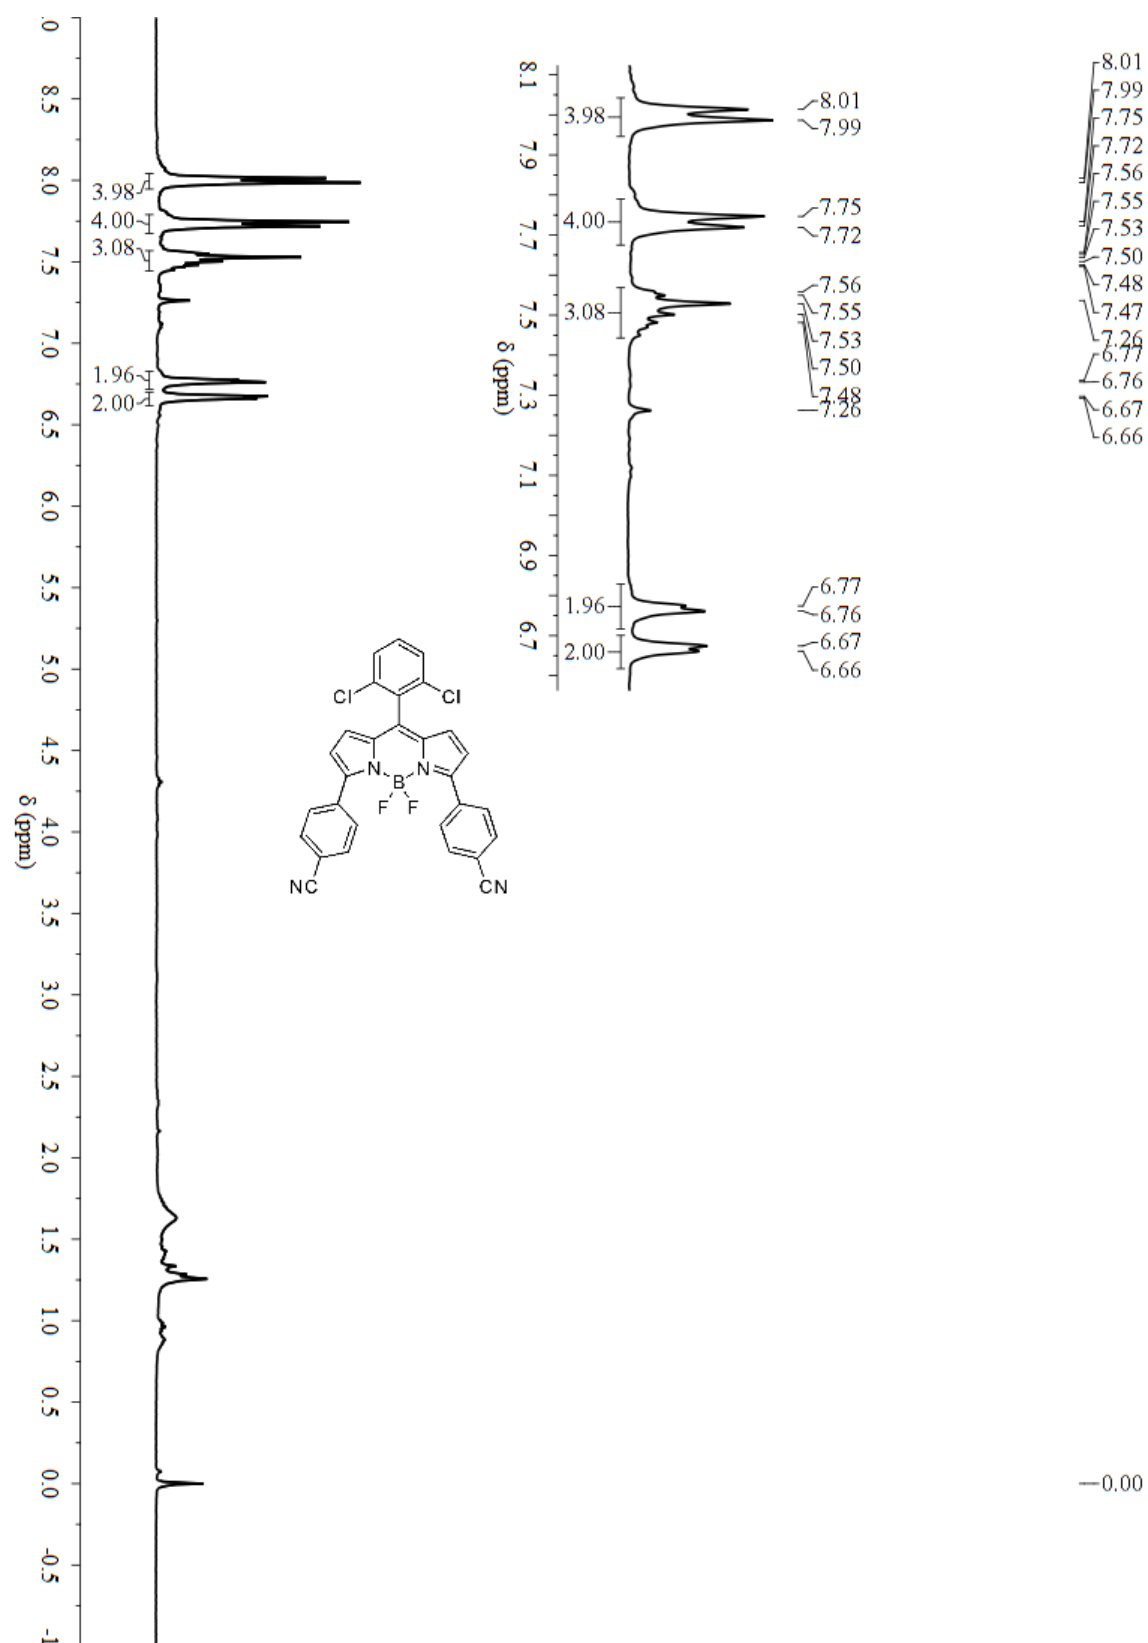

<sup>1</sup>H NMR spectrum of **4c** in CDCl<sub>3</sub>

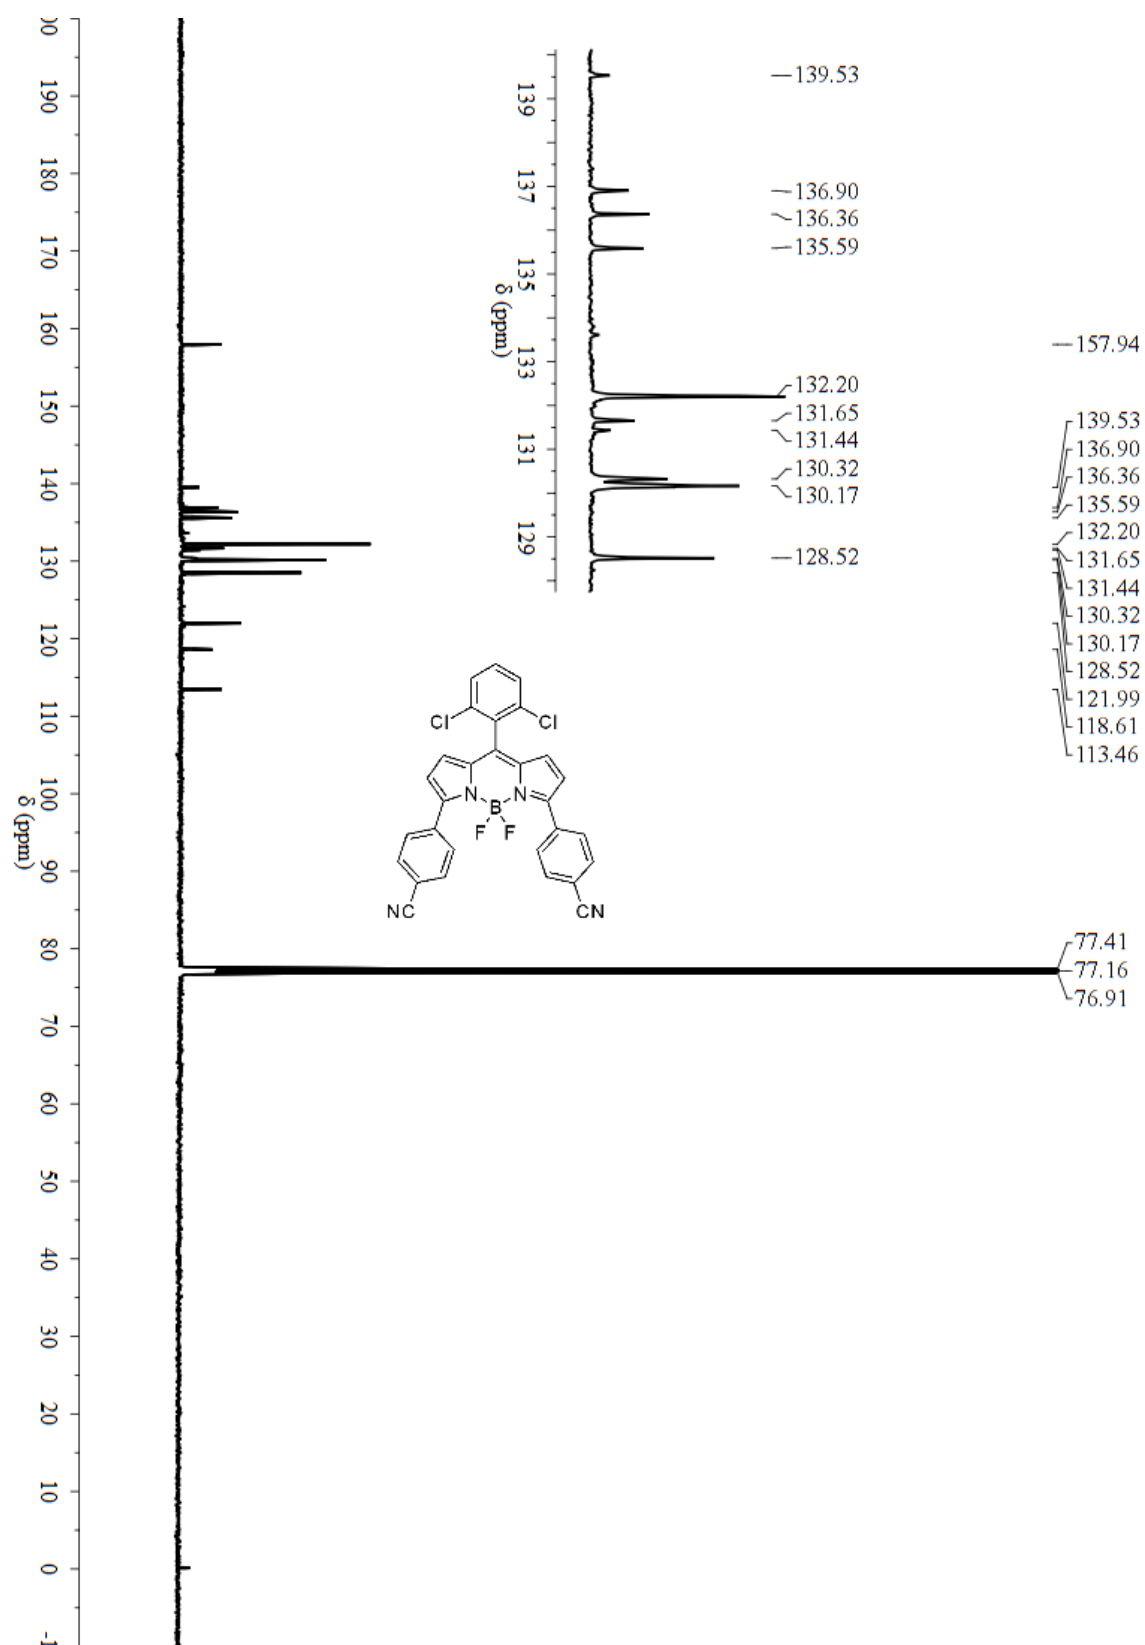

<sup>13</sup>C NMR spectrum of **4c** in CDCl<sub>3</sub>

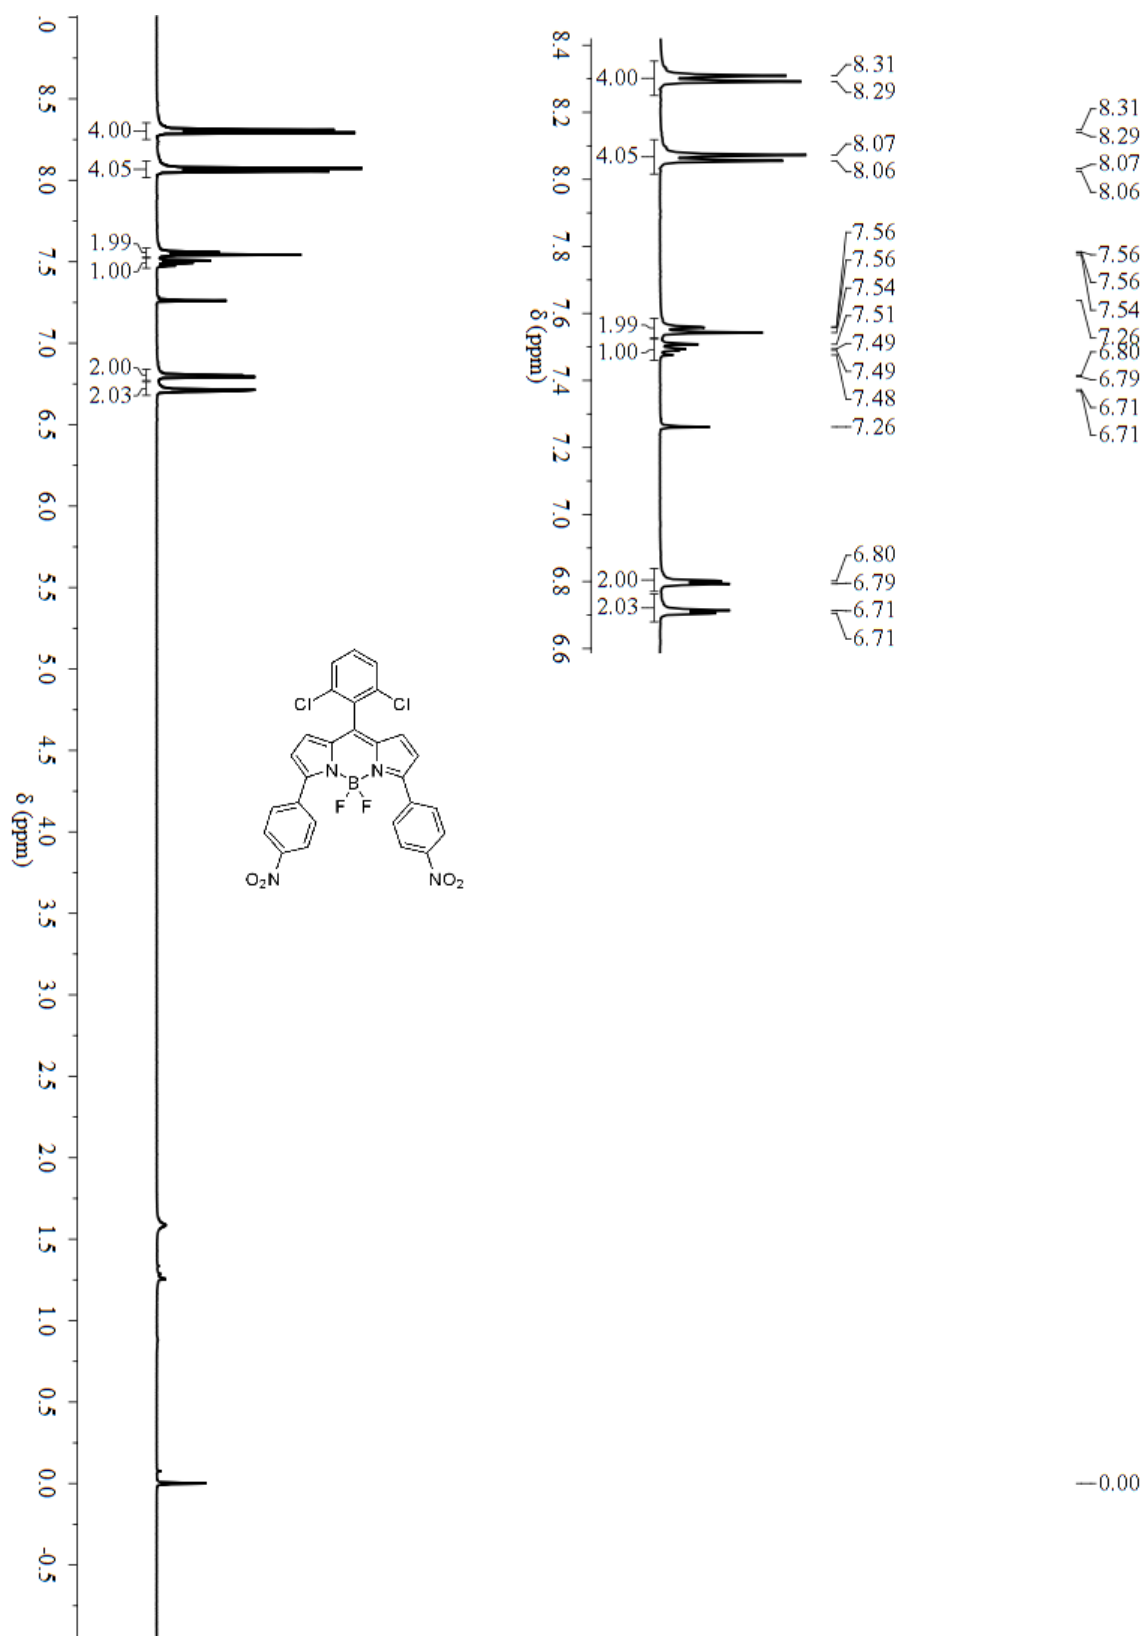

<sup>1</sup>H NMR spectrum of **4d** in CDCl<sub>3</sub>

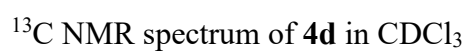

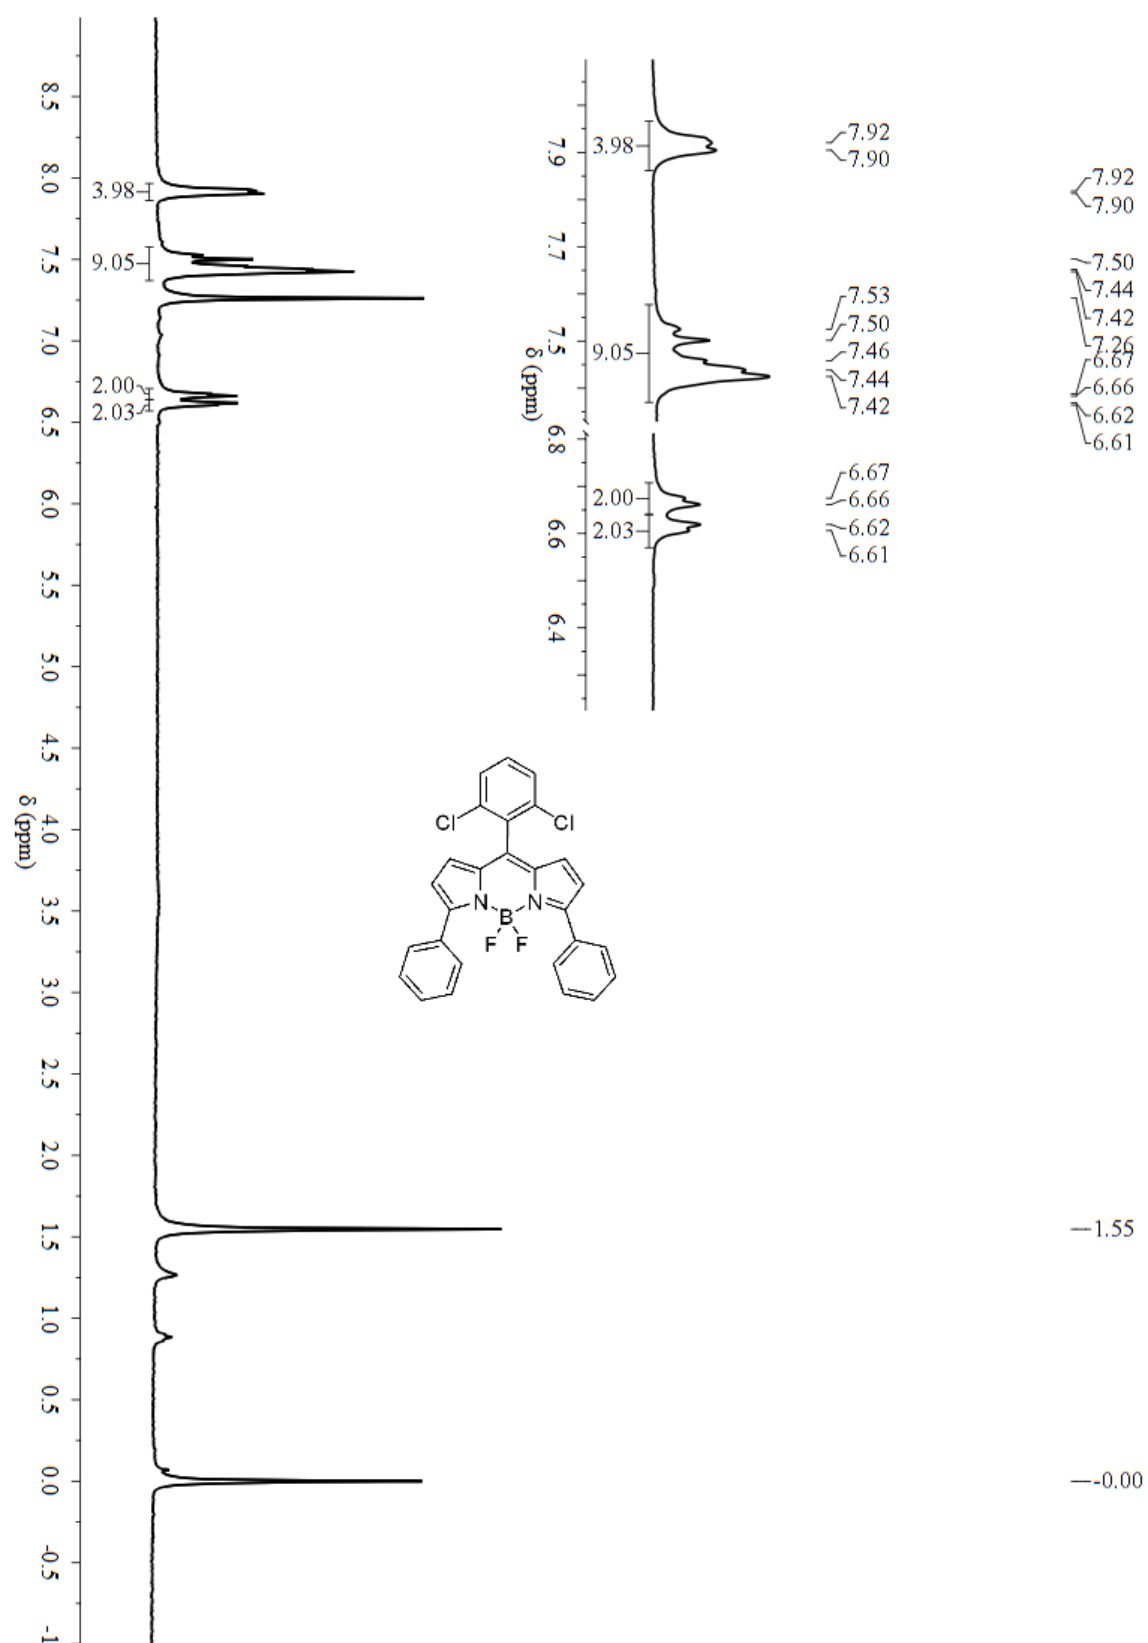

<sup>1</sup>H NMR spectrum of **4e** in CDCl<sub>3</sub>

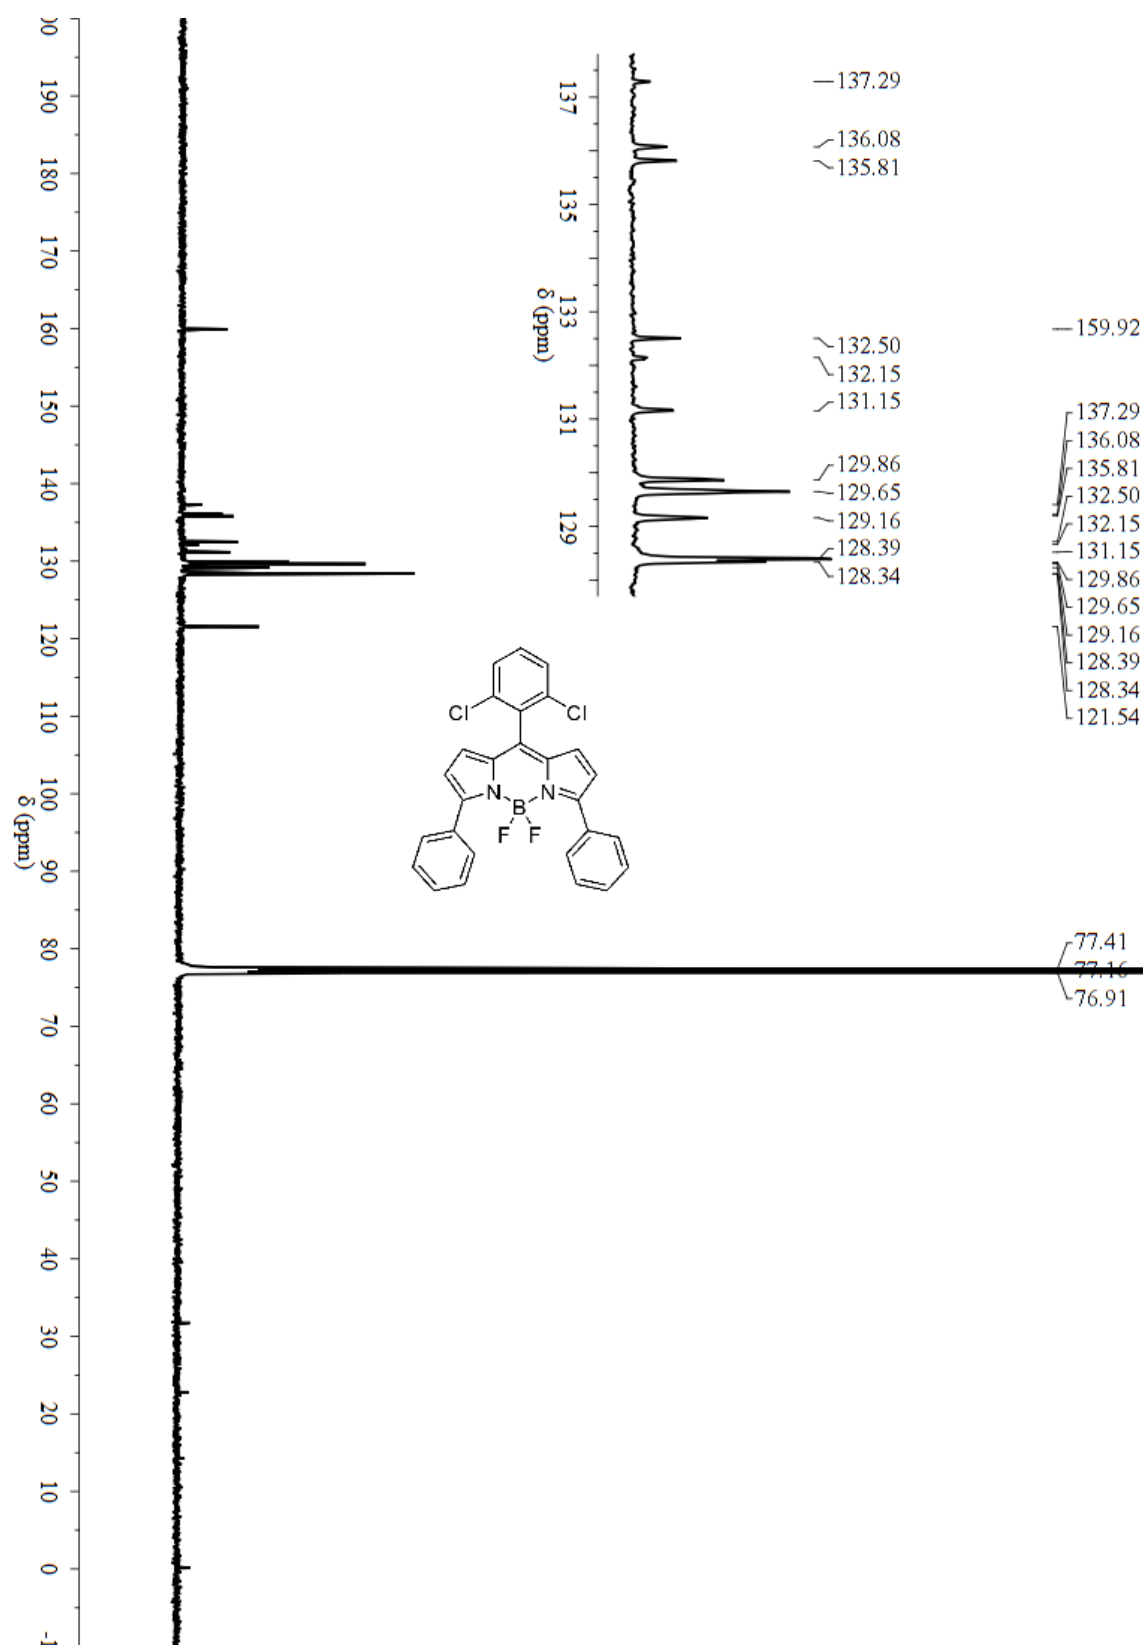

$^{13}\text{C}$  NMR spectrum of **4e** in  $\text{CDCl}_3$



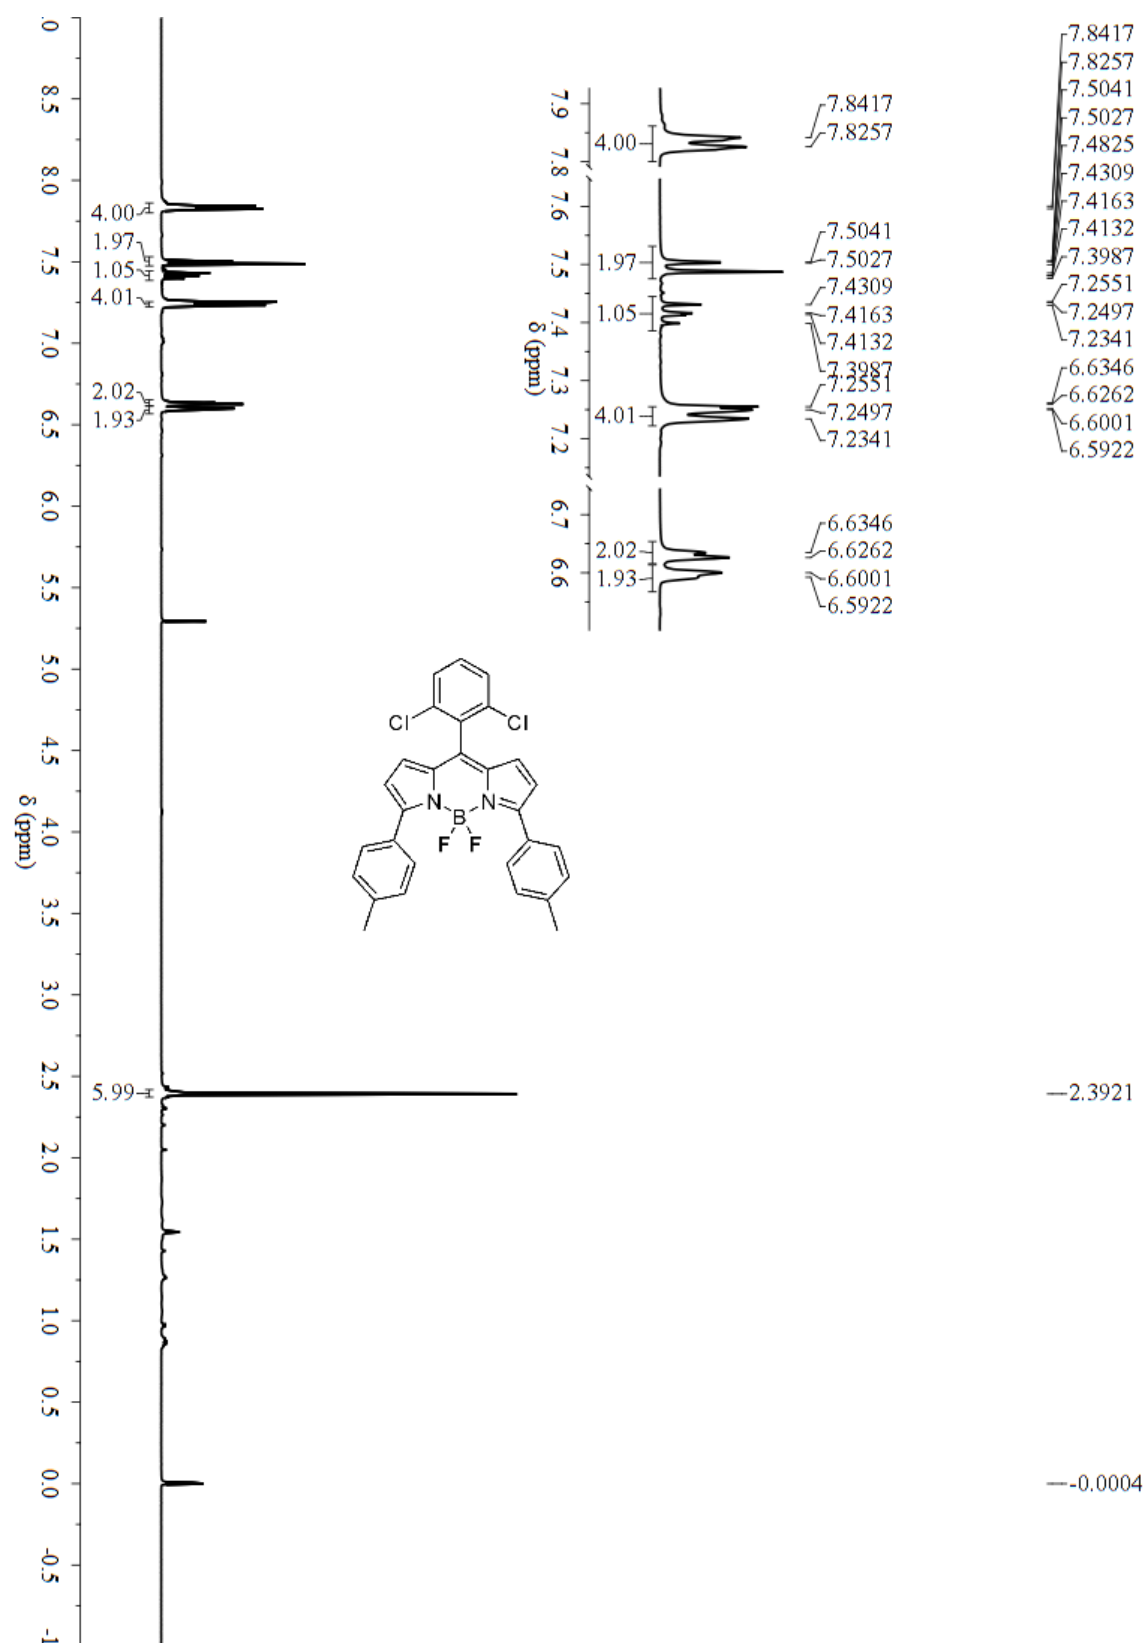

<sup>1</sup>H NMR spectrum of **4f** in CDCl<sub>3</sub>

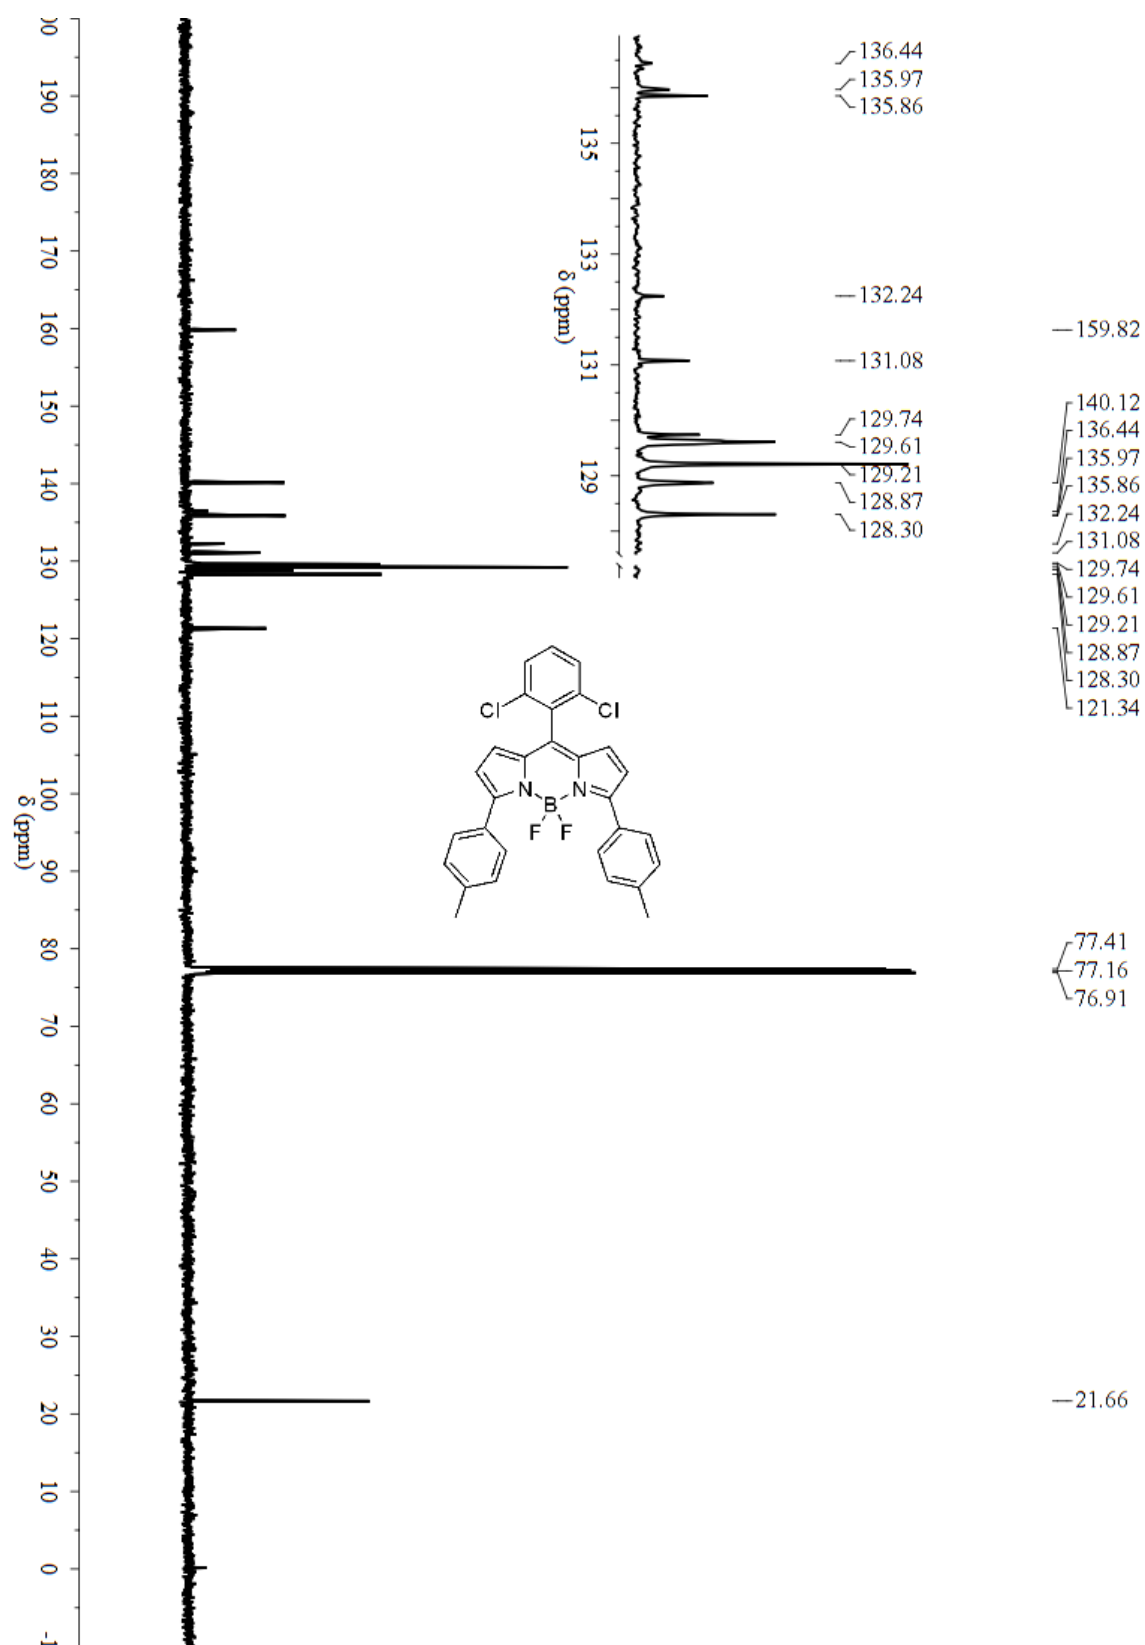

<sup>13</sup>C NMR spectrum of **4f** in CDCl<sub>3</sub>

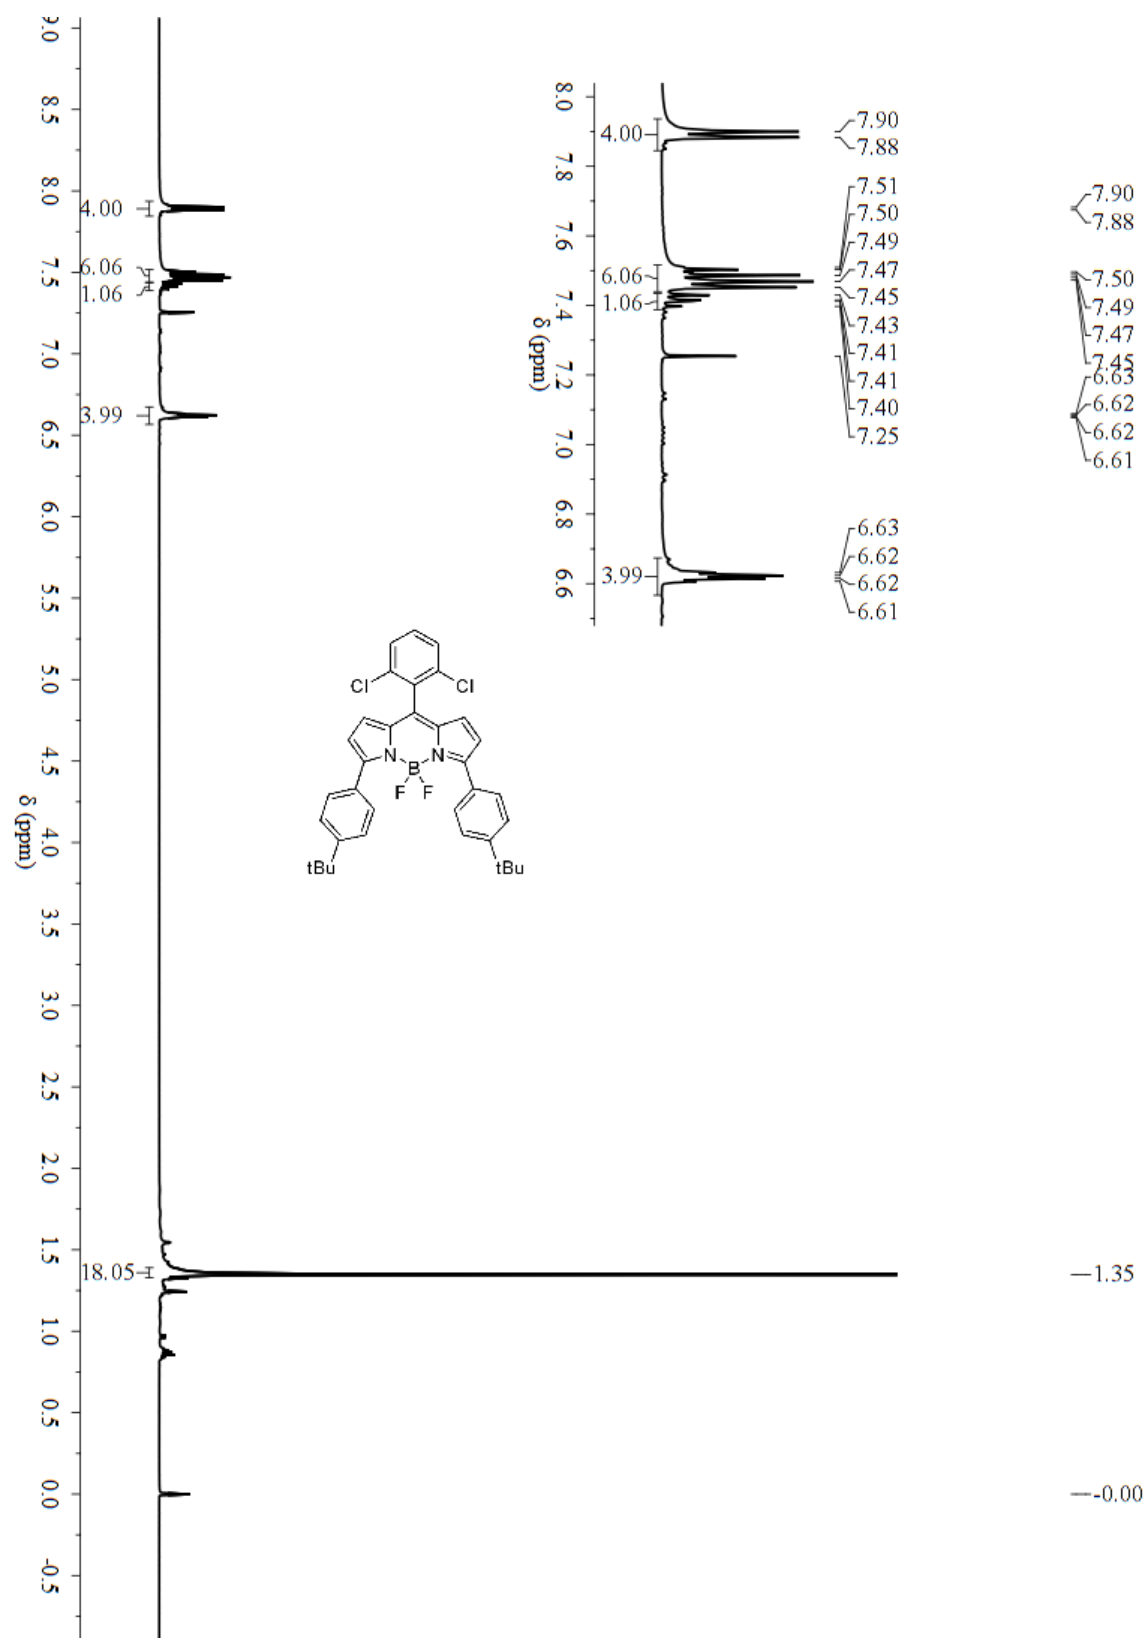

<sup>1</sup>H NMR spectrum of **4g** in CDCl<sub>3</sub>

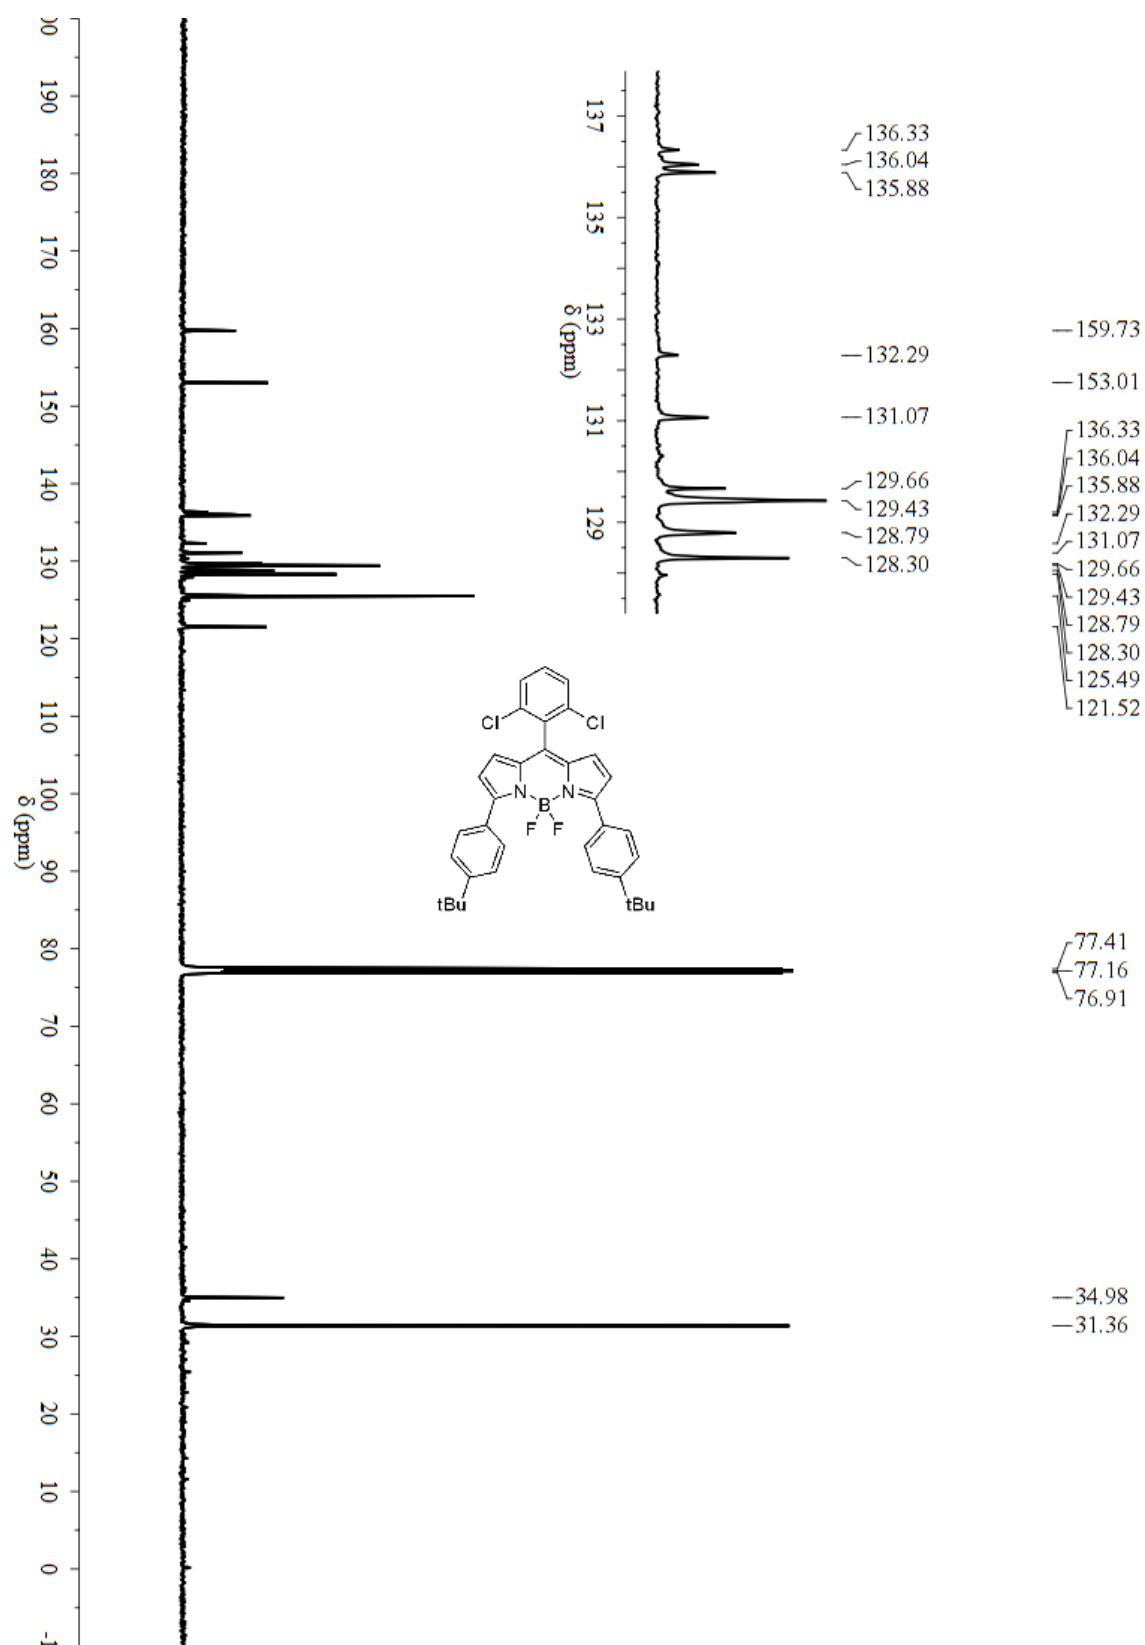

<sup>13</sup>C NMR spectrum of **4g** in CDCl<sub>3</sub>

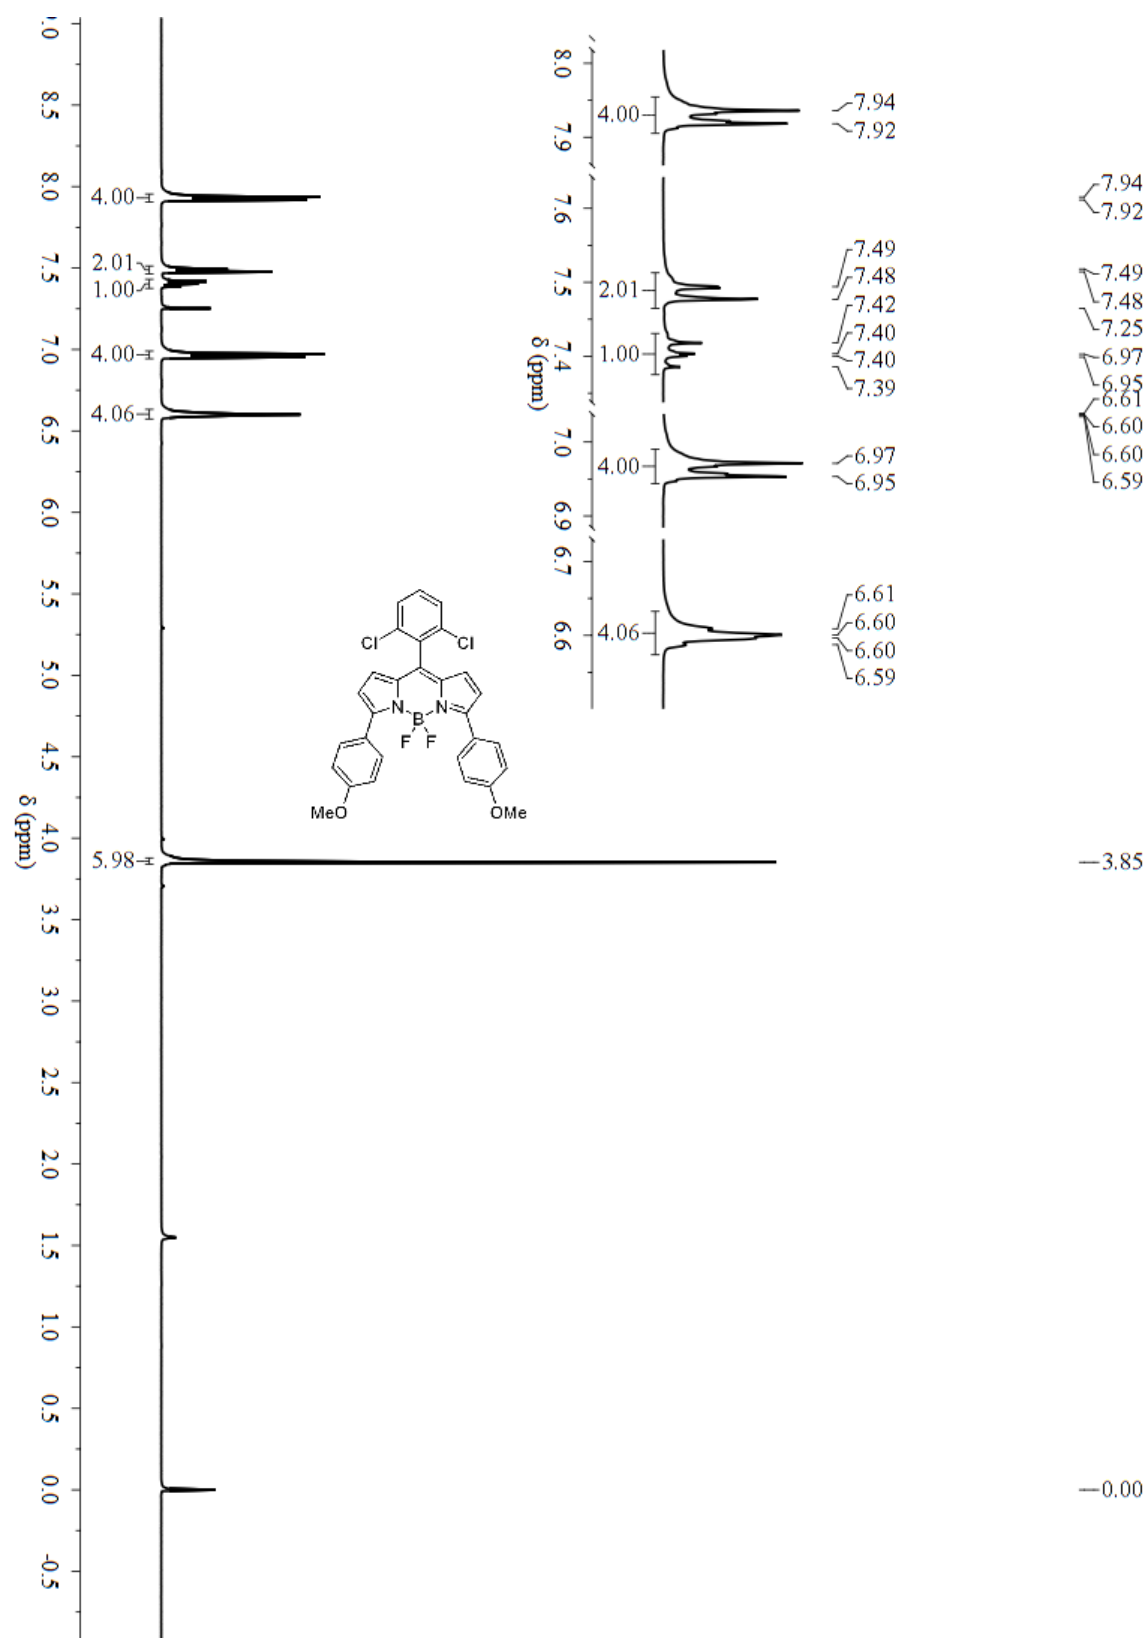

<sup>1</sup>H NMR spectrum of **4h** in CDCl<sub>3</sub>

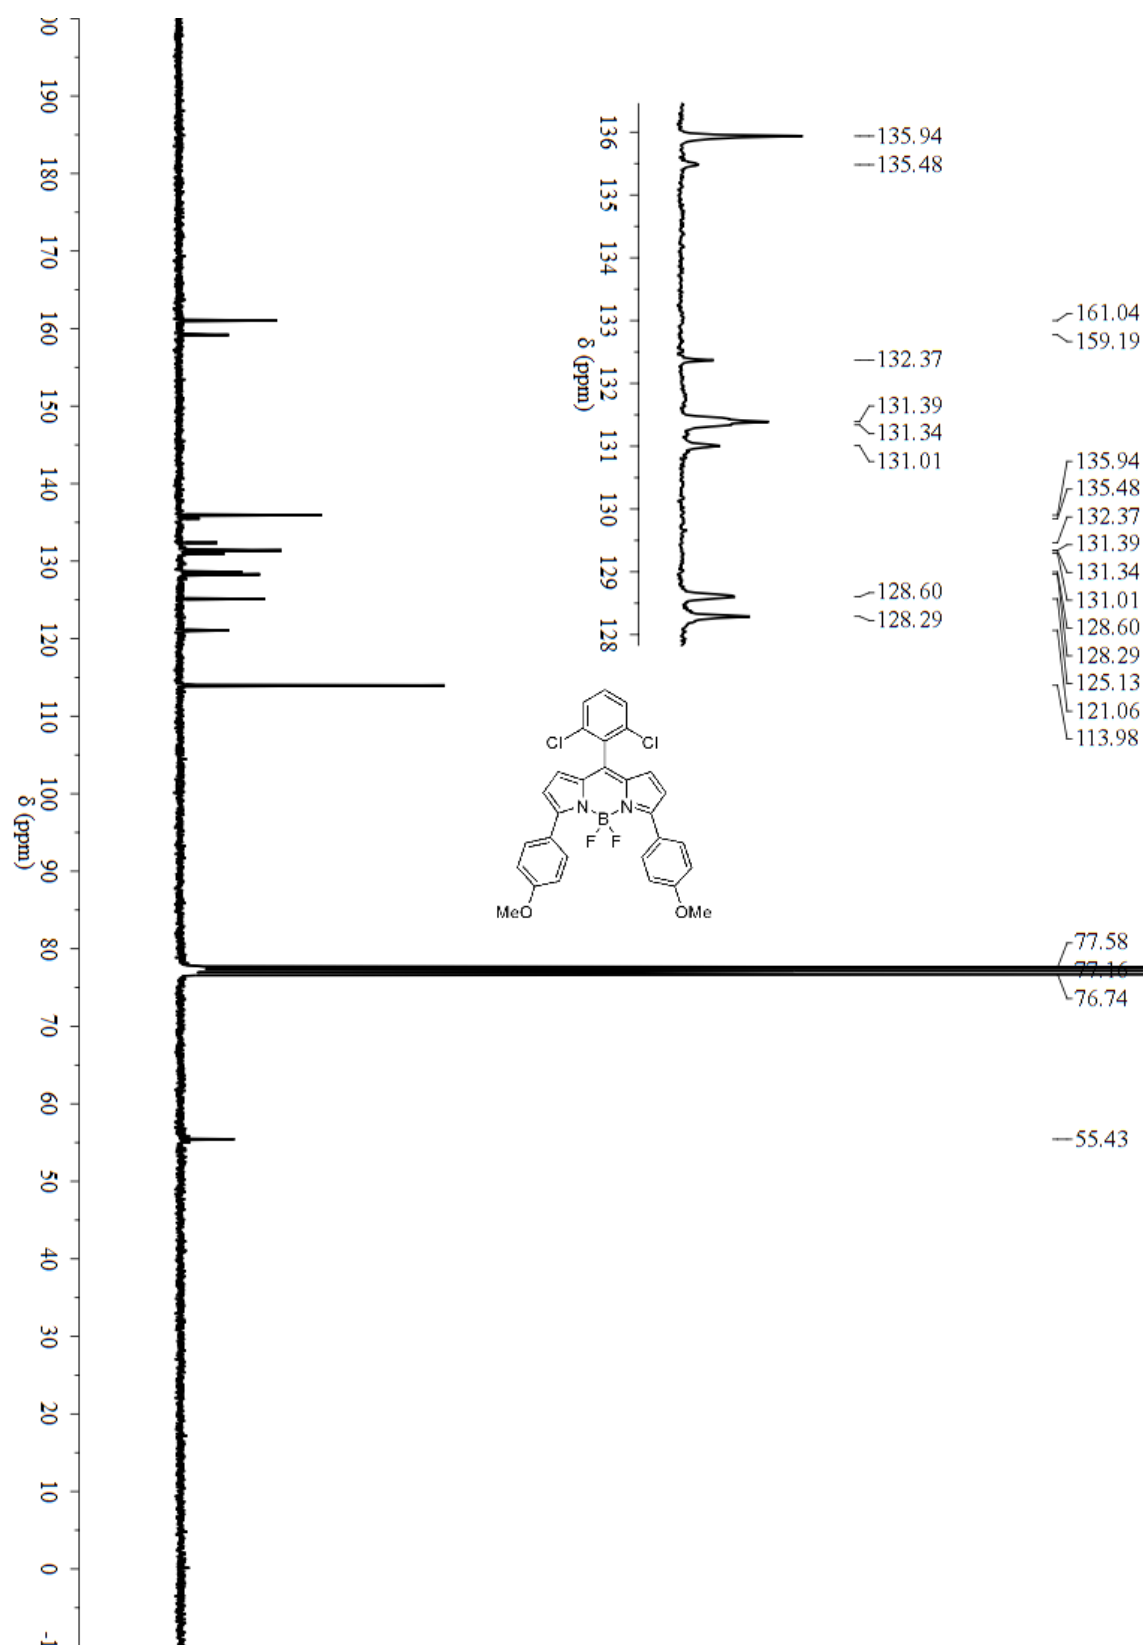

<sup>13</sup>C NMR spectrum of **4h** in CDCl<sub>3</sub>

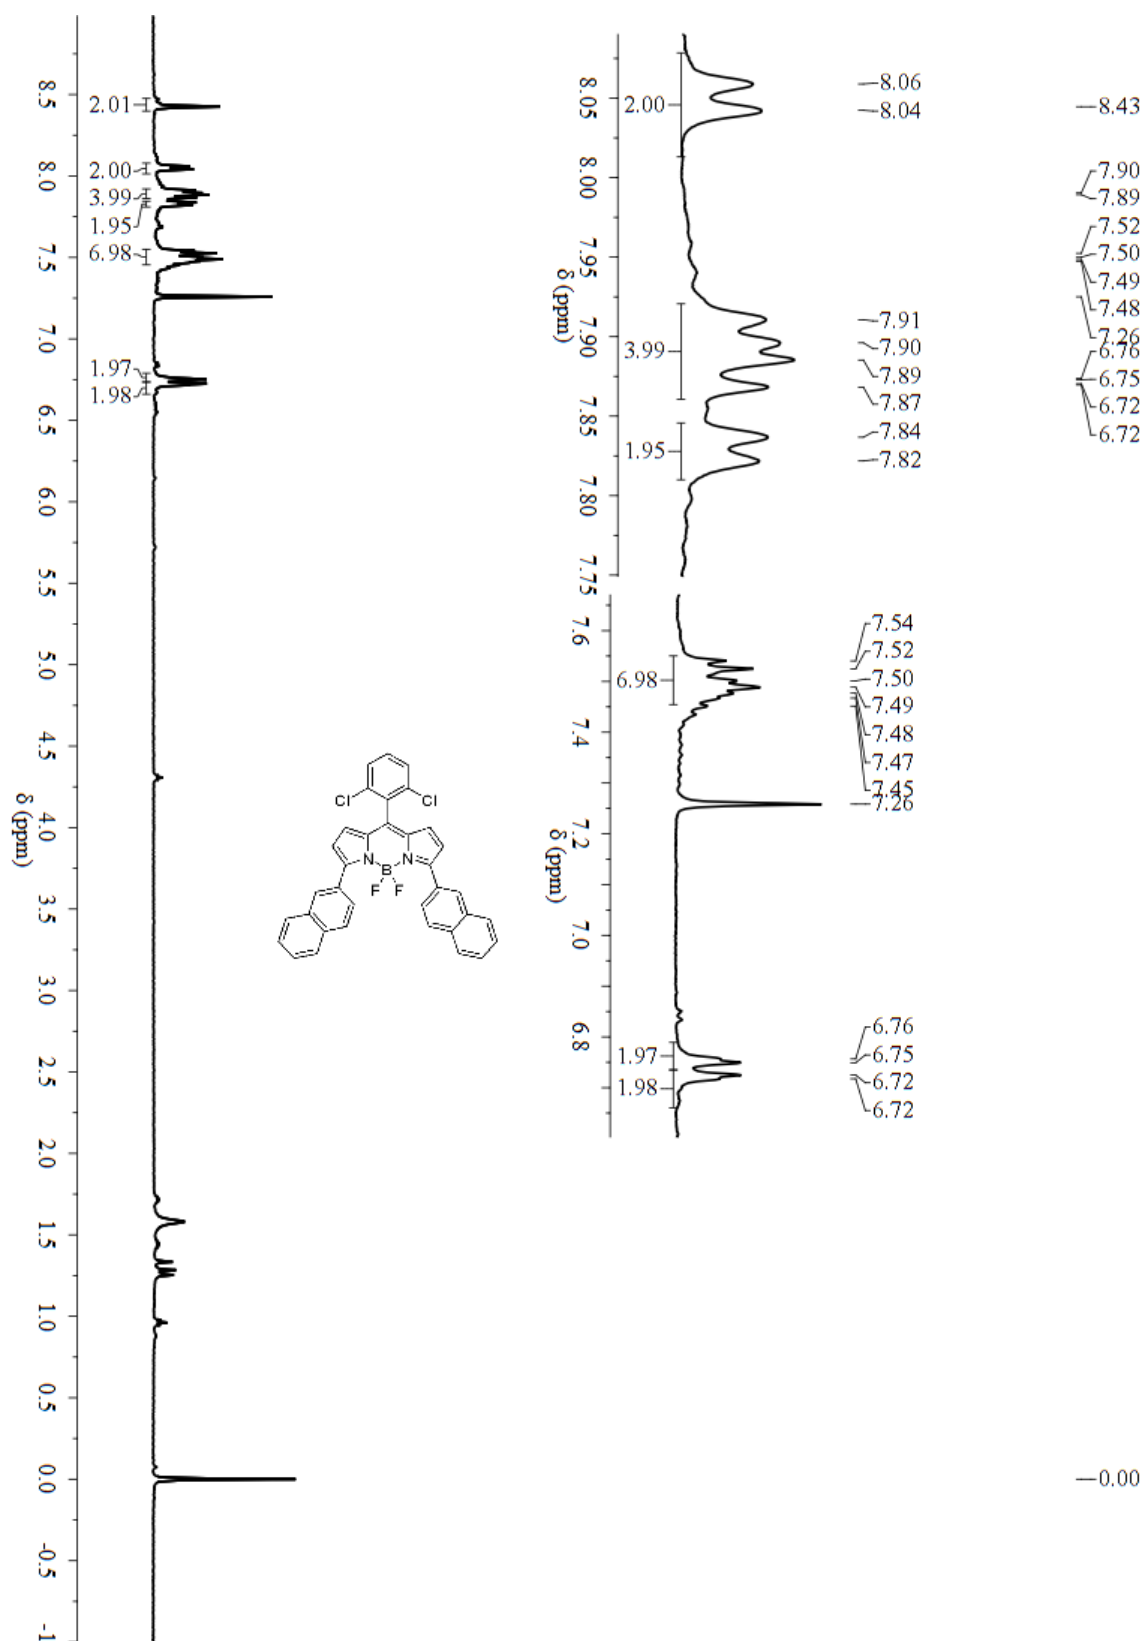

$^1\text{H}$  NMR spectrum of **4i** in  $\text{CDCl}_3$

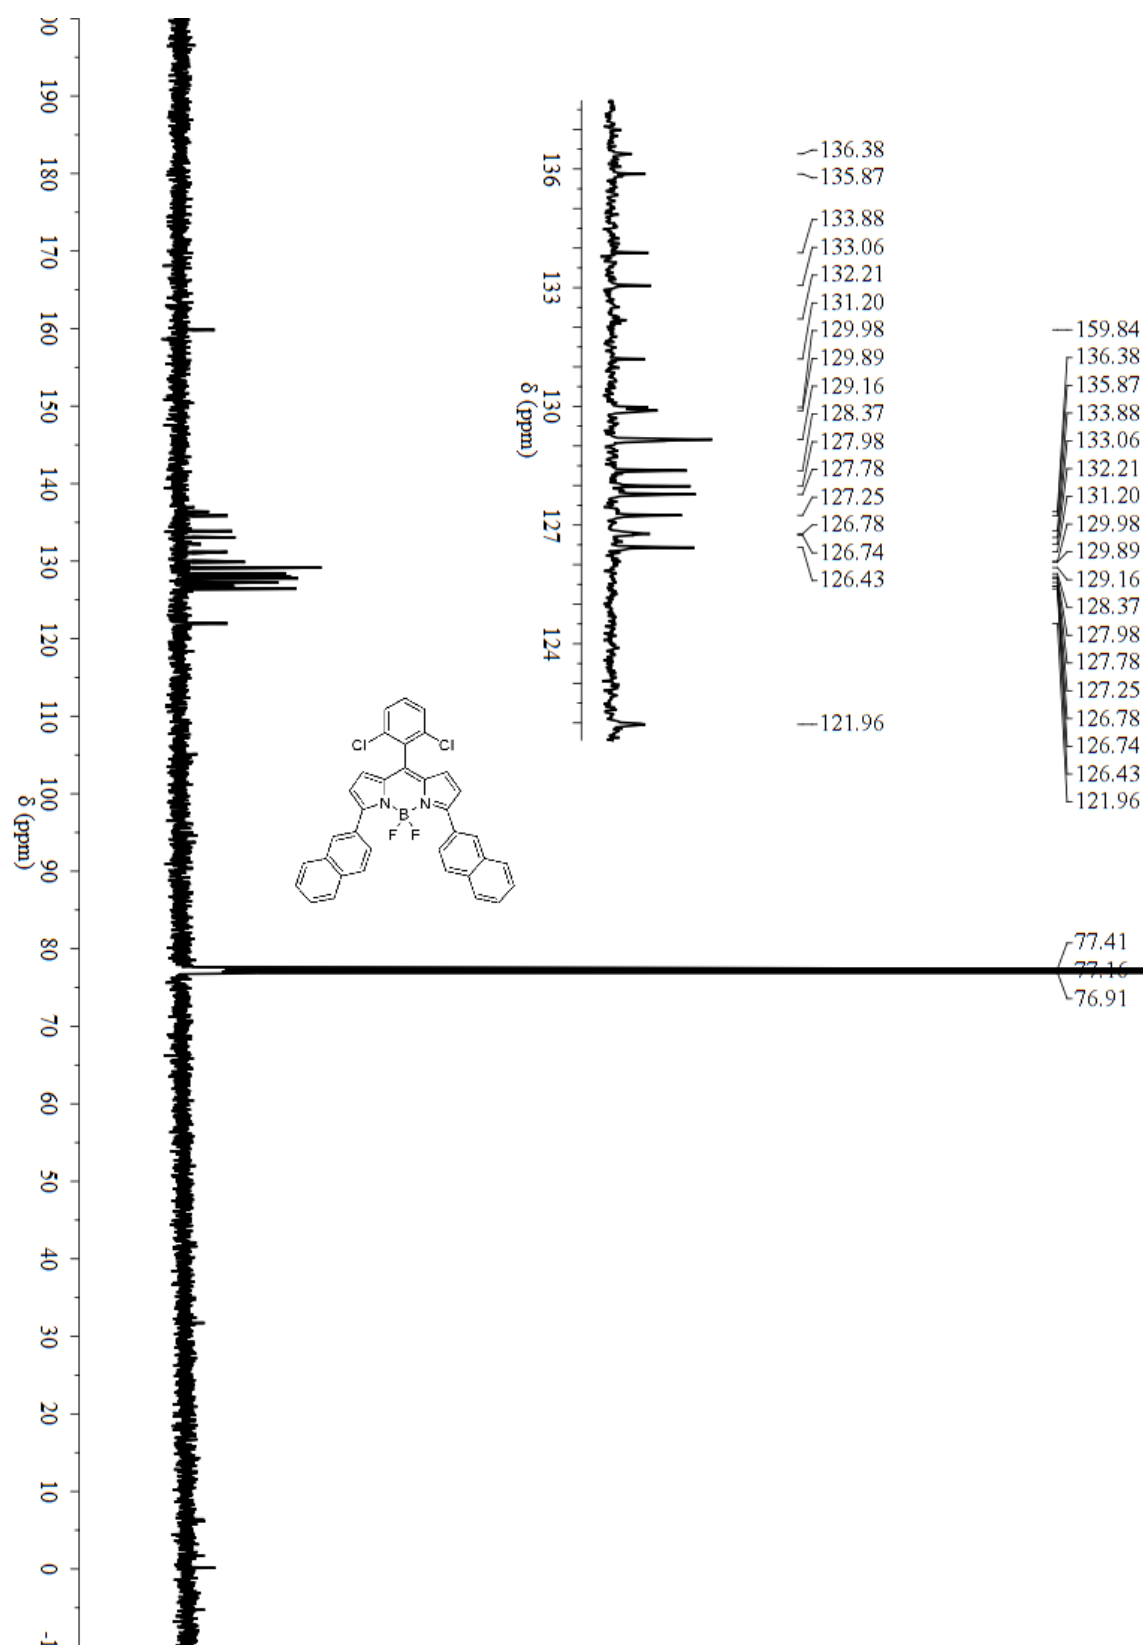

$^{13}\text{C}$  NMR spectrum of **4i** in  $\text{CDCl}_3$





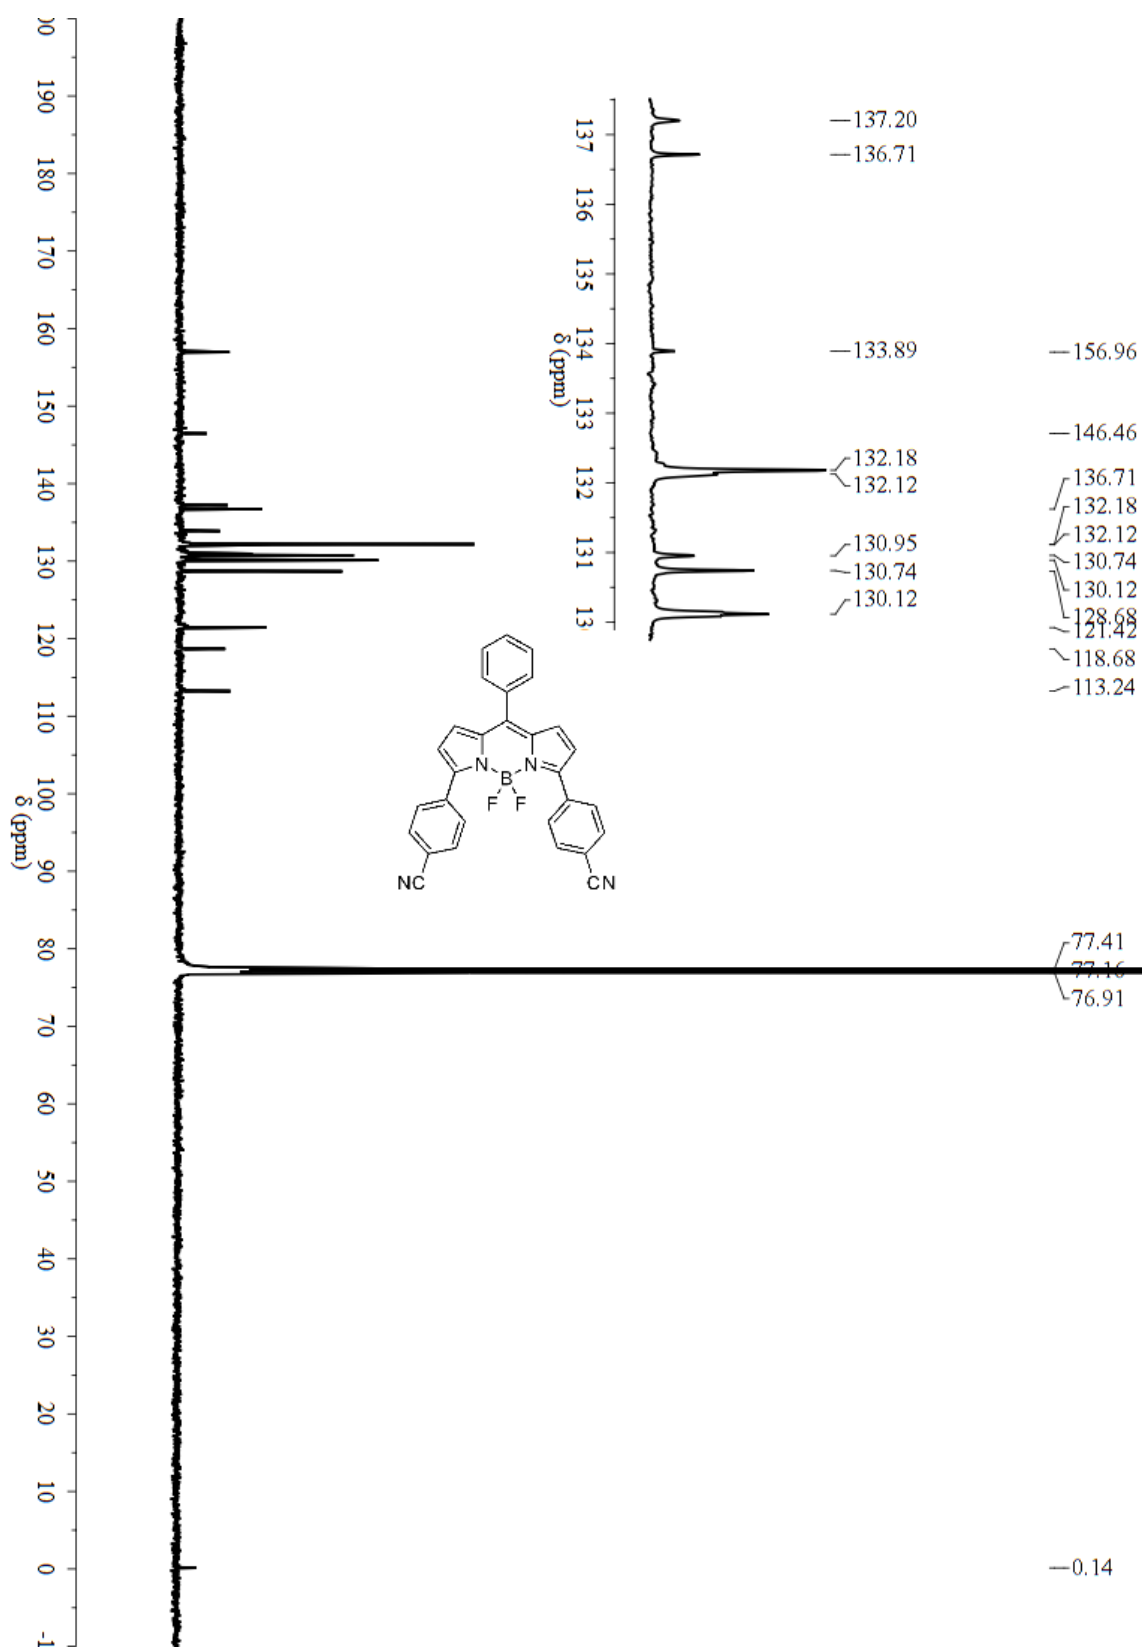

<sup>13</sup>C NMR spectrum of **4j** in CDCl<sub>3</sub>

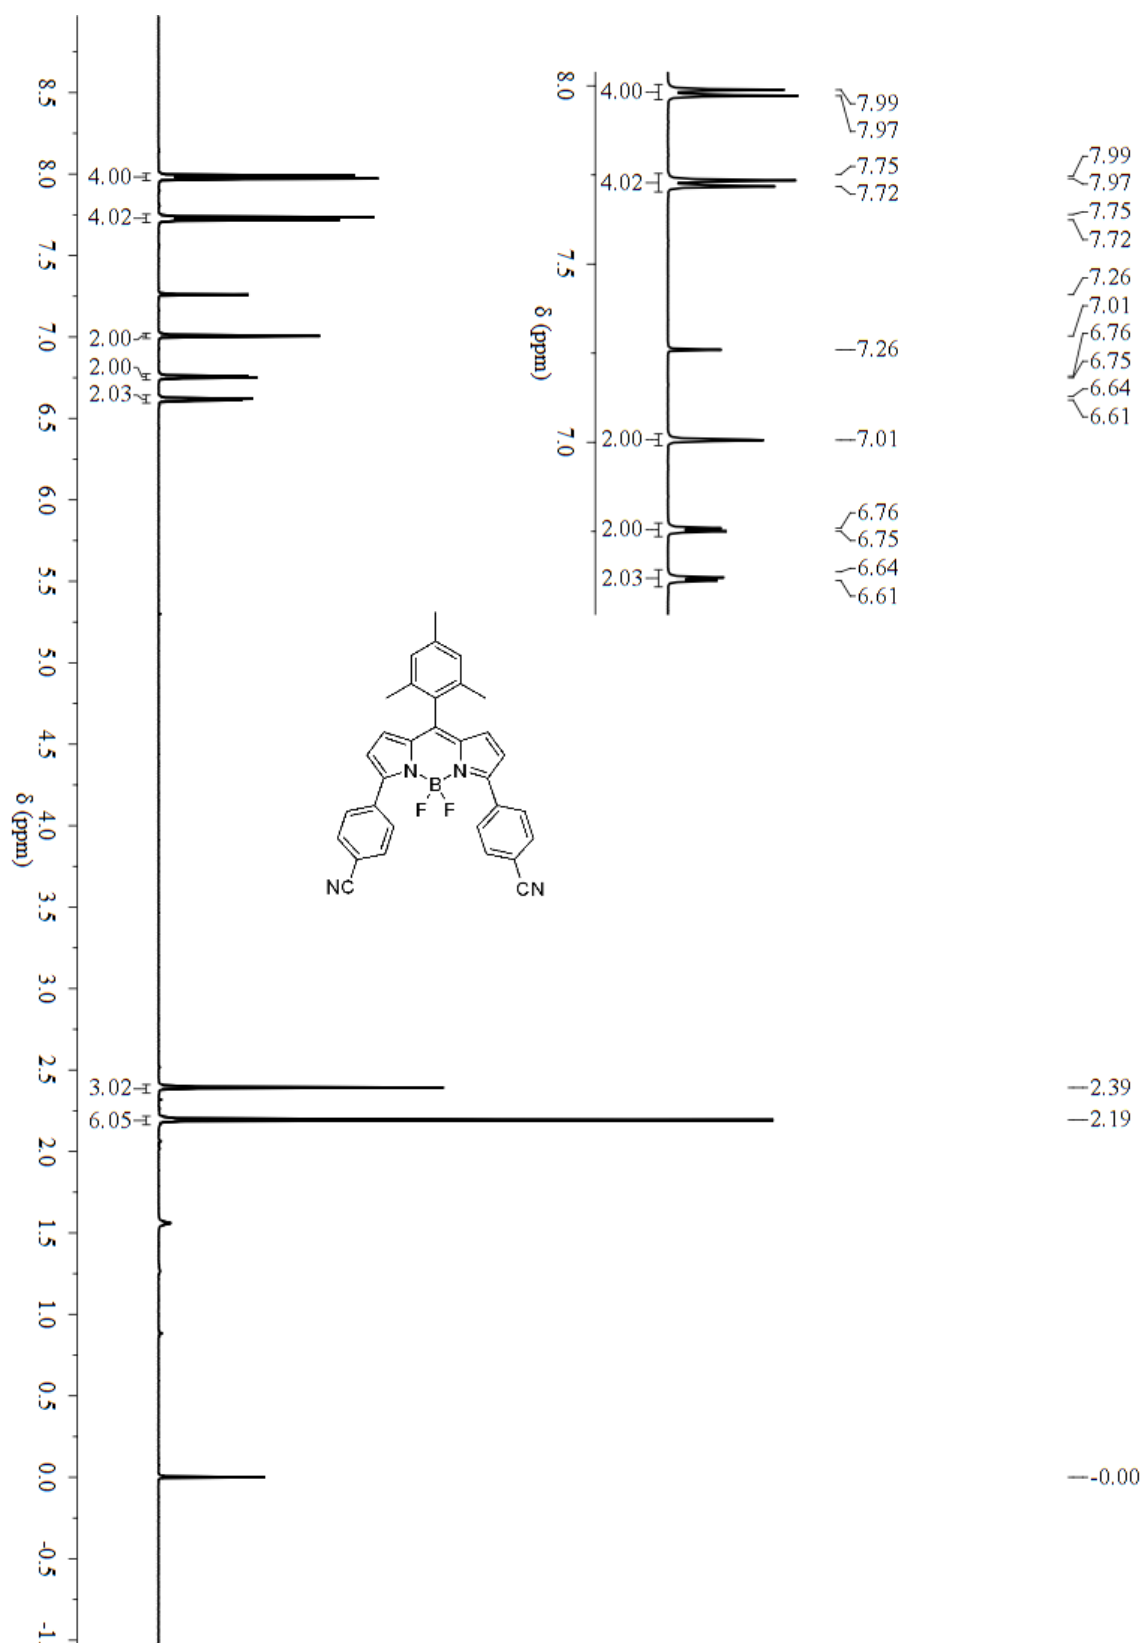

<sup>1</sup>H NMR spectrum of **4k** in CDCl<sub>3</sub>

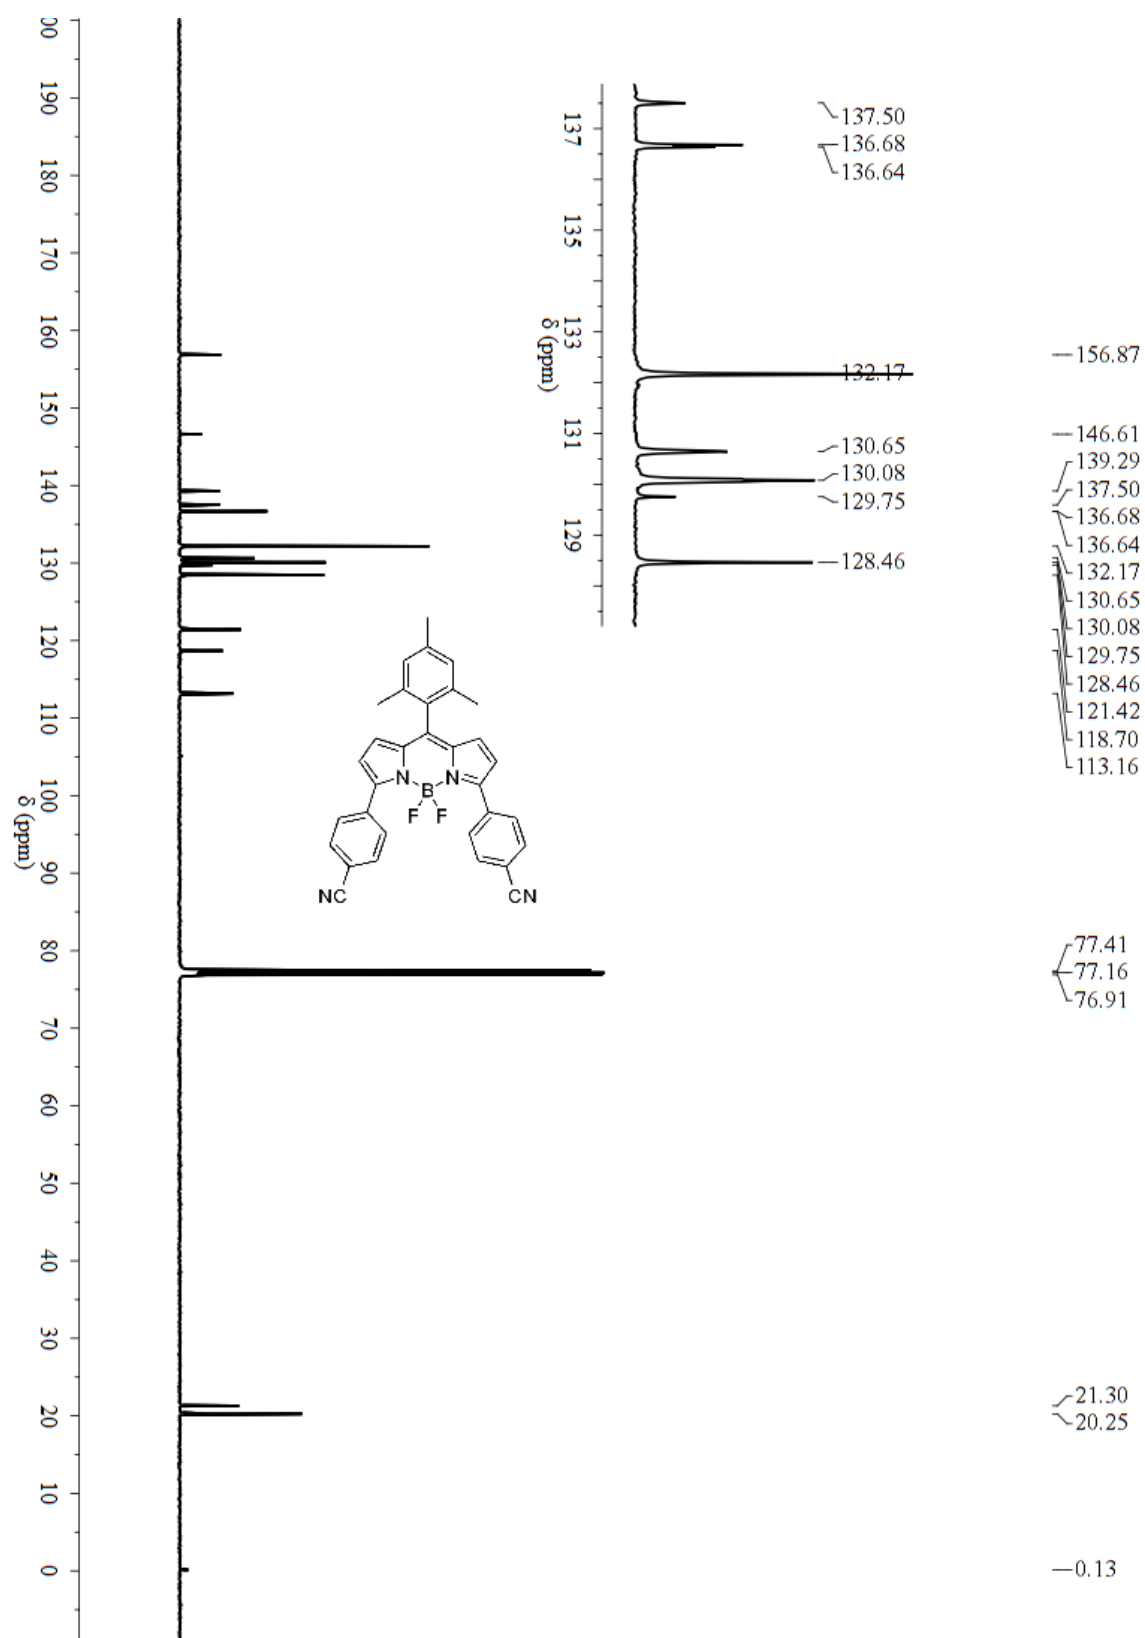

<sup>13</sup>C NMR spectrum of **4k** in CDCl<sub>3</sub>

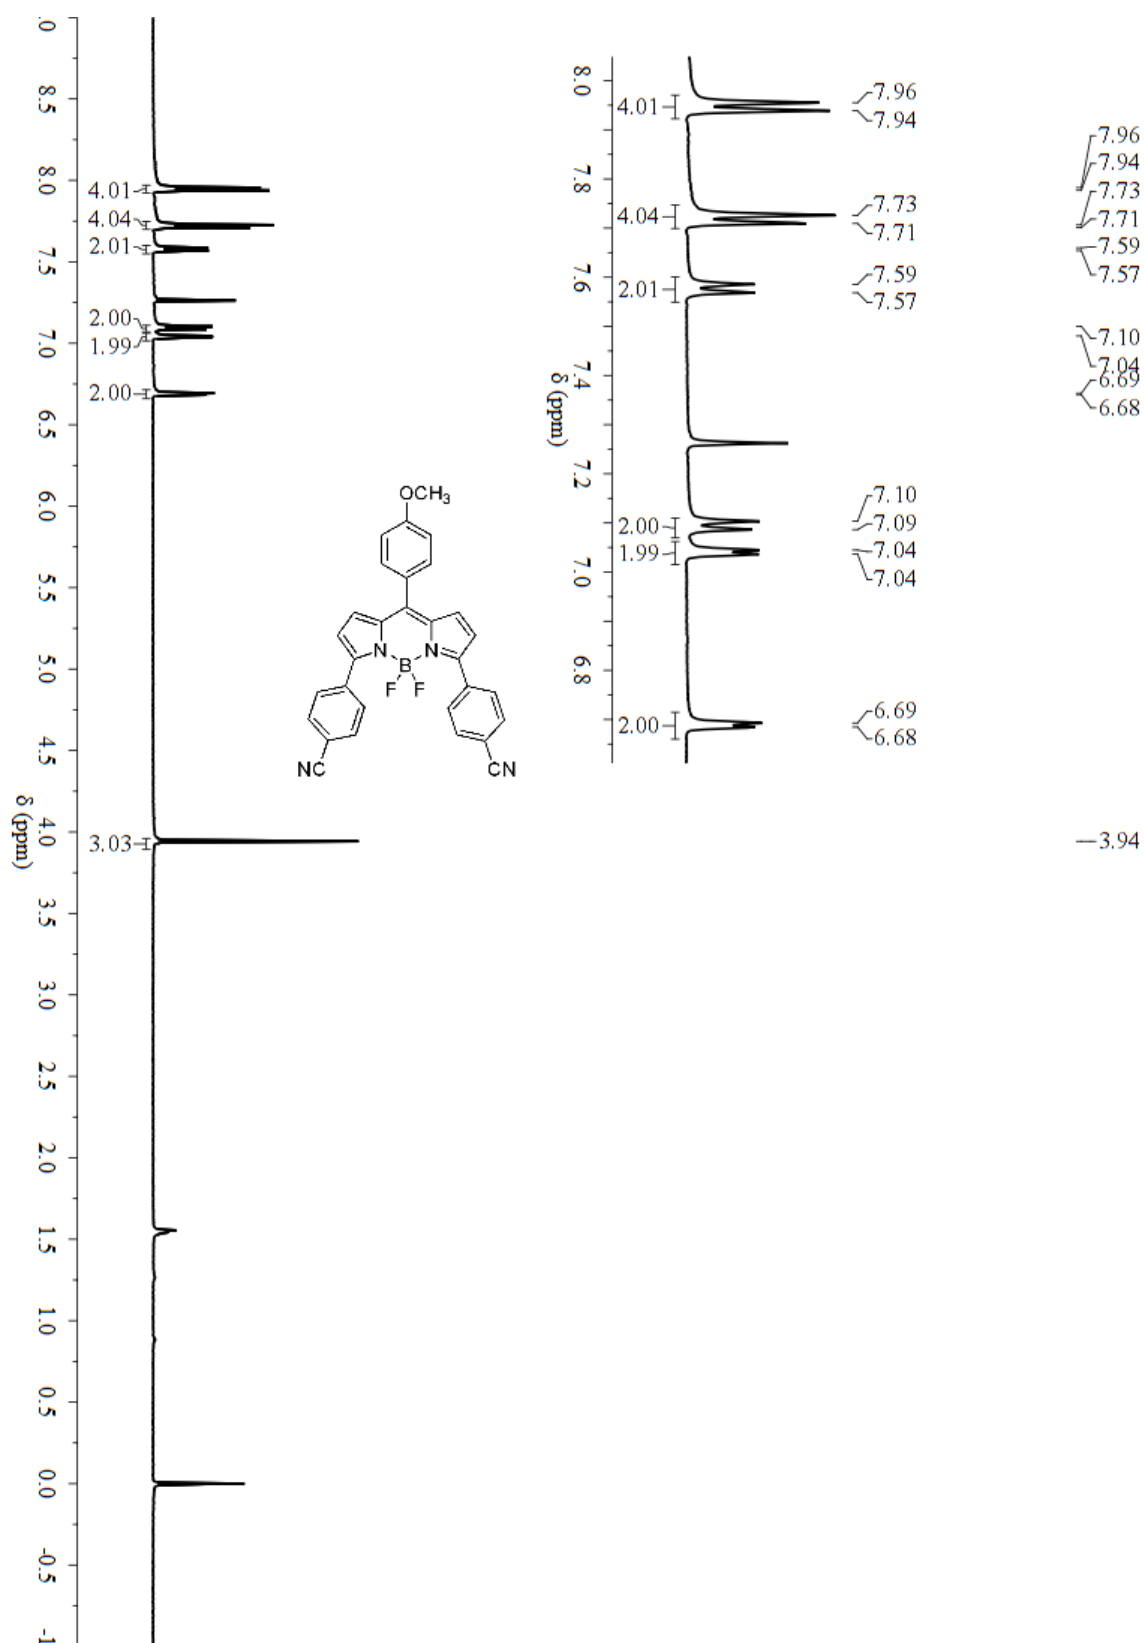

<sup>1</sup>H NMR spectrum of **4l** in CDCl<sub>3</sub>

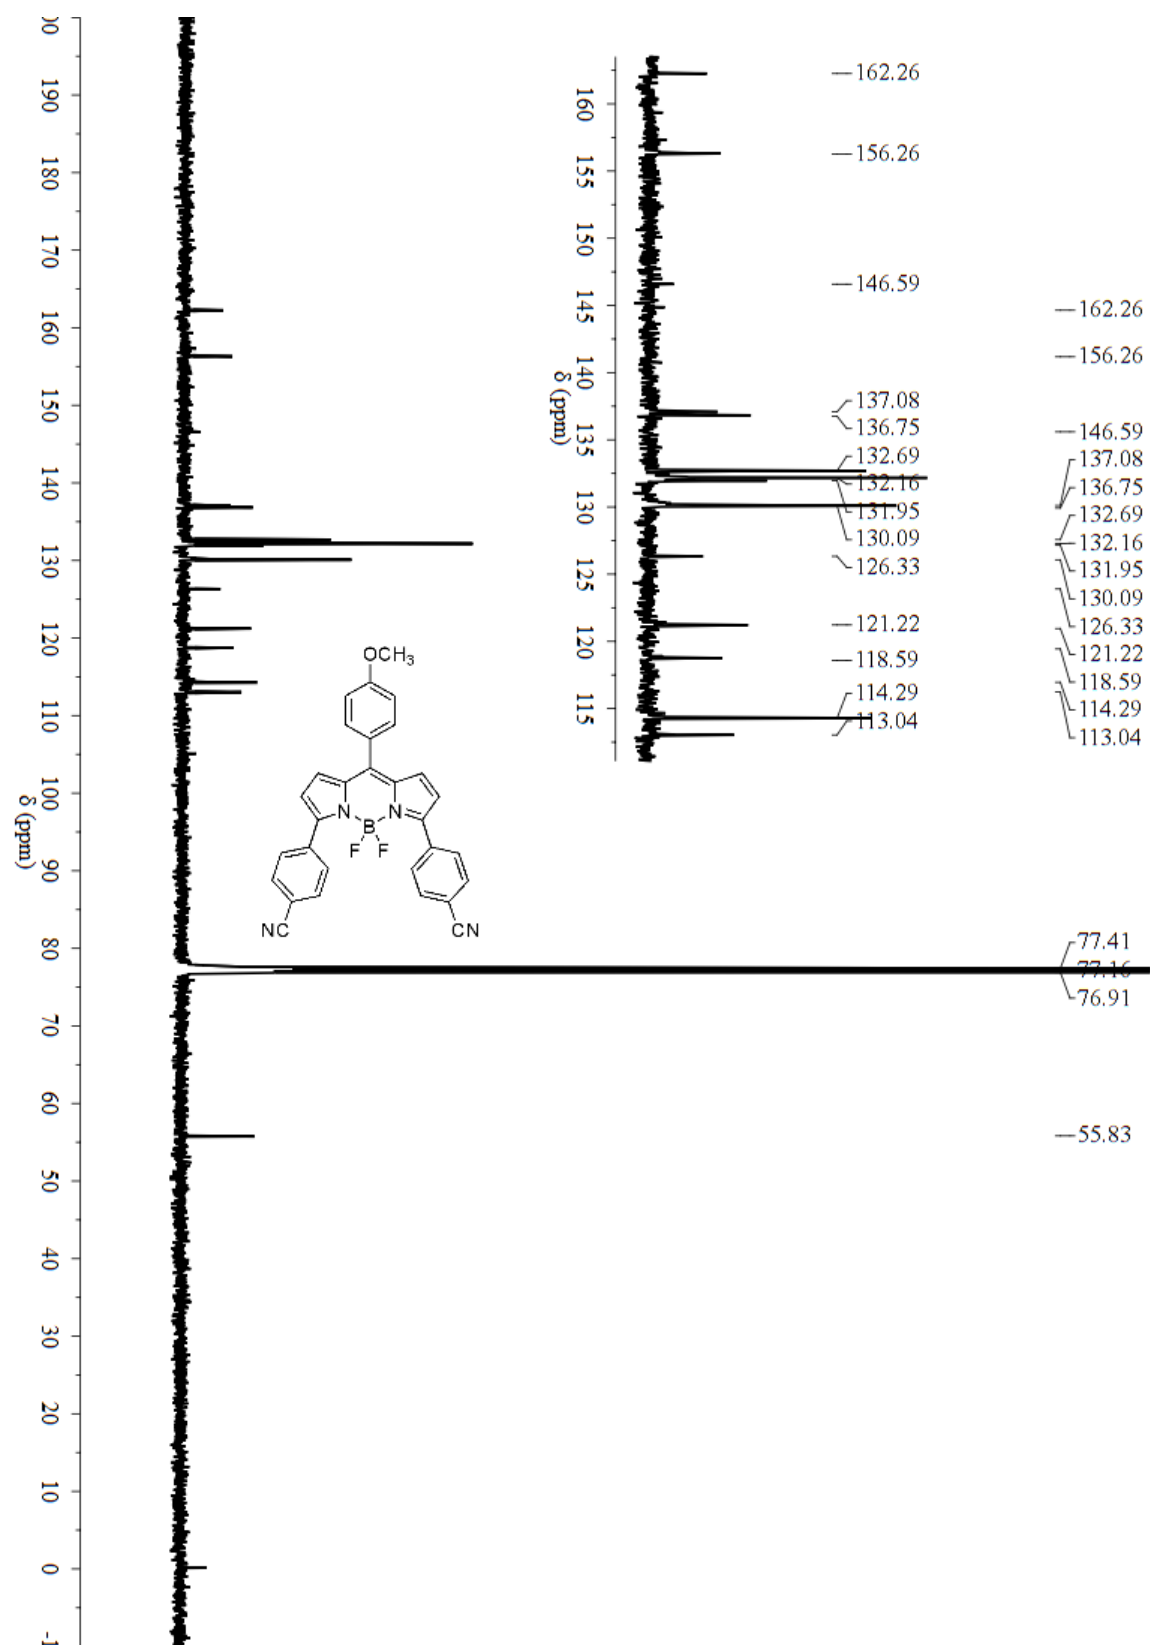

$^{13}\text{C}$  NMR spectrum of **4l** in  $\text{CDCl}_3$

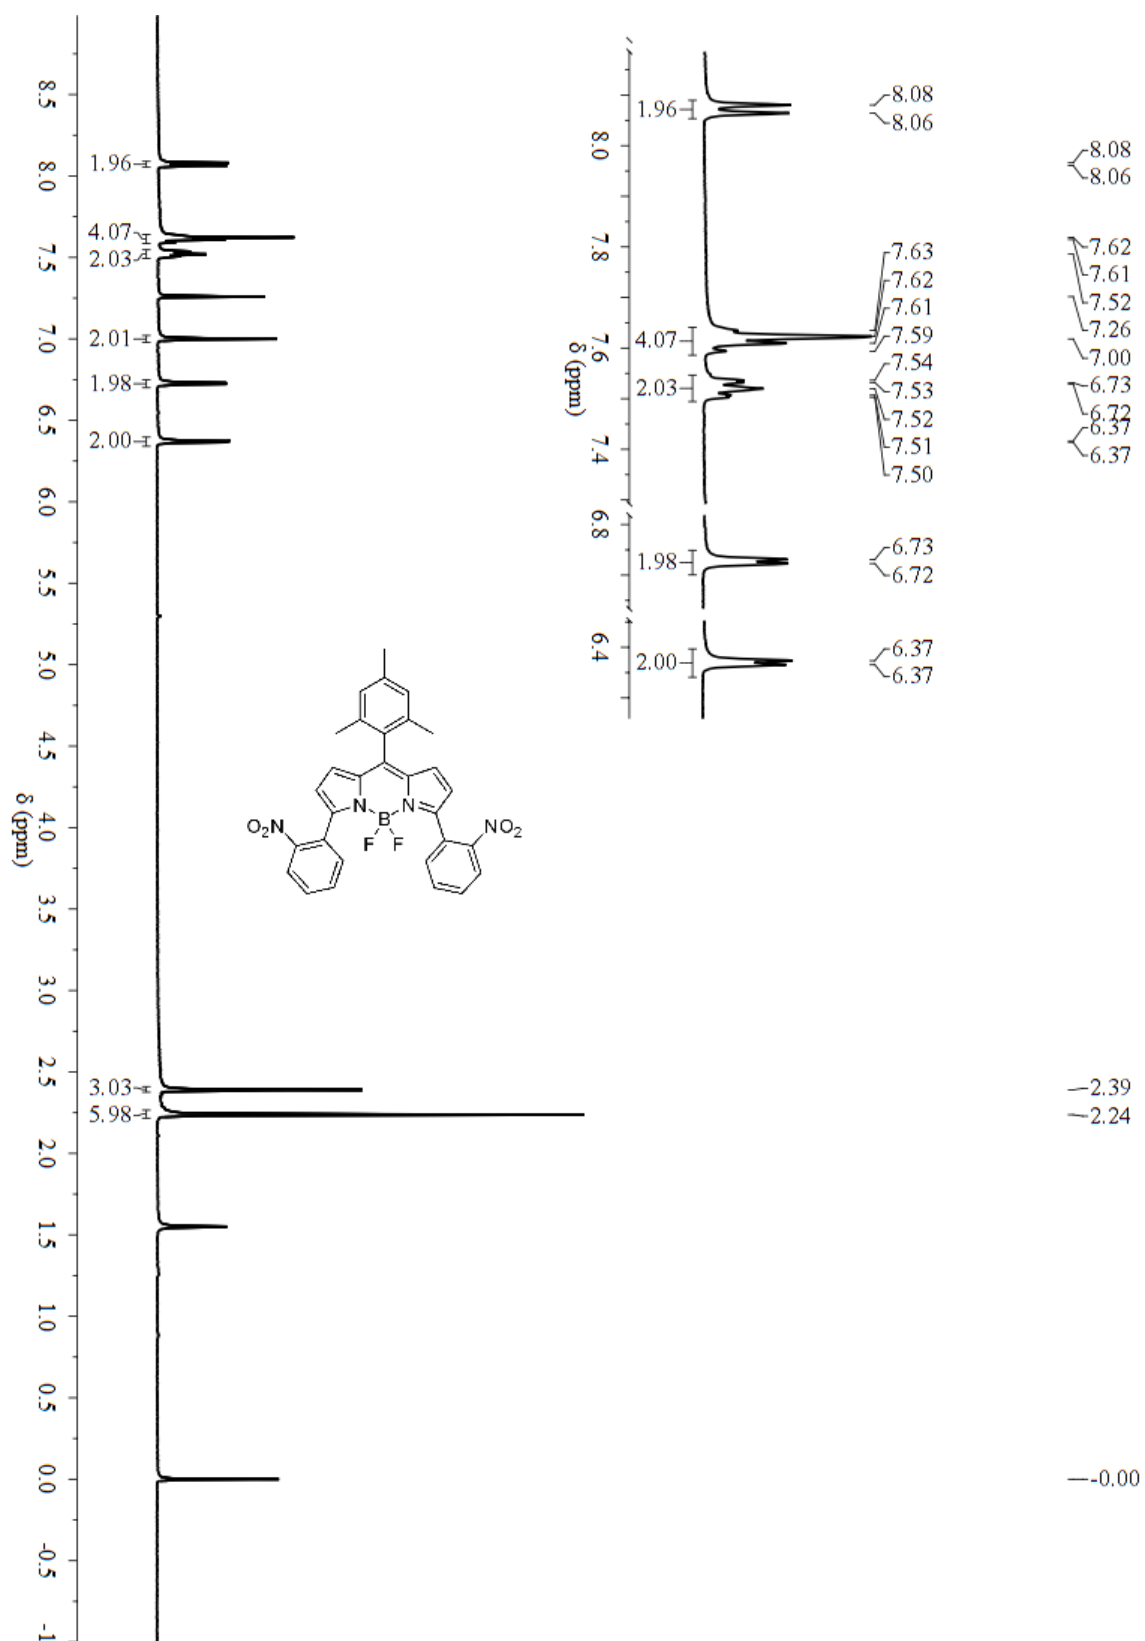

<sup>1</sup>H NMR spectrum of **4n** in CDCl<sub>3</sub>

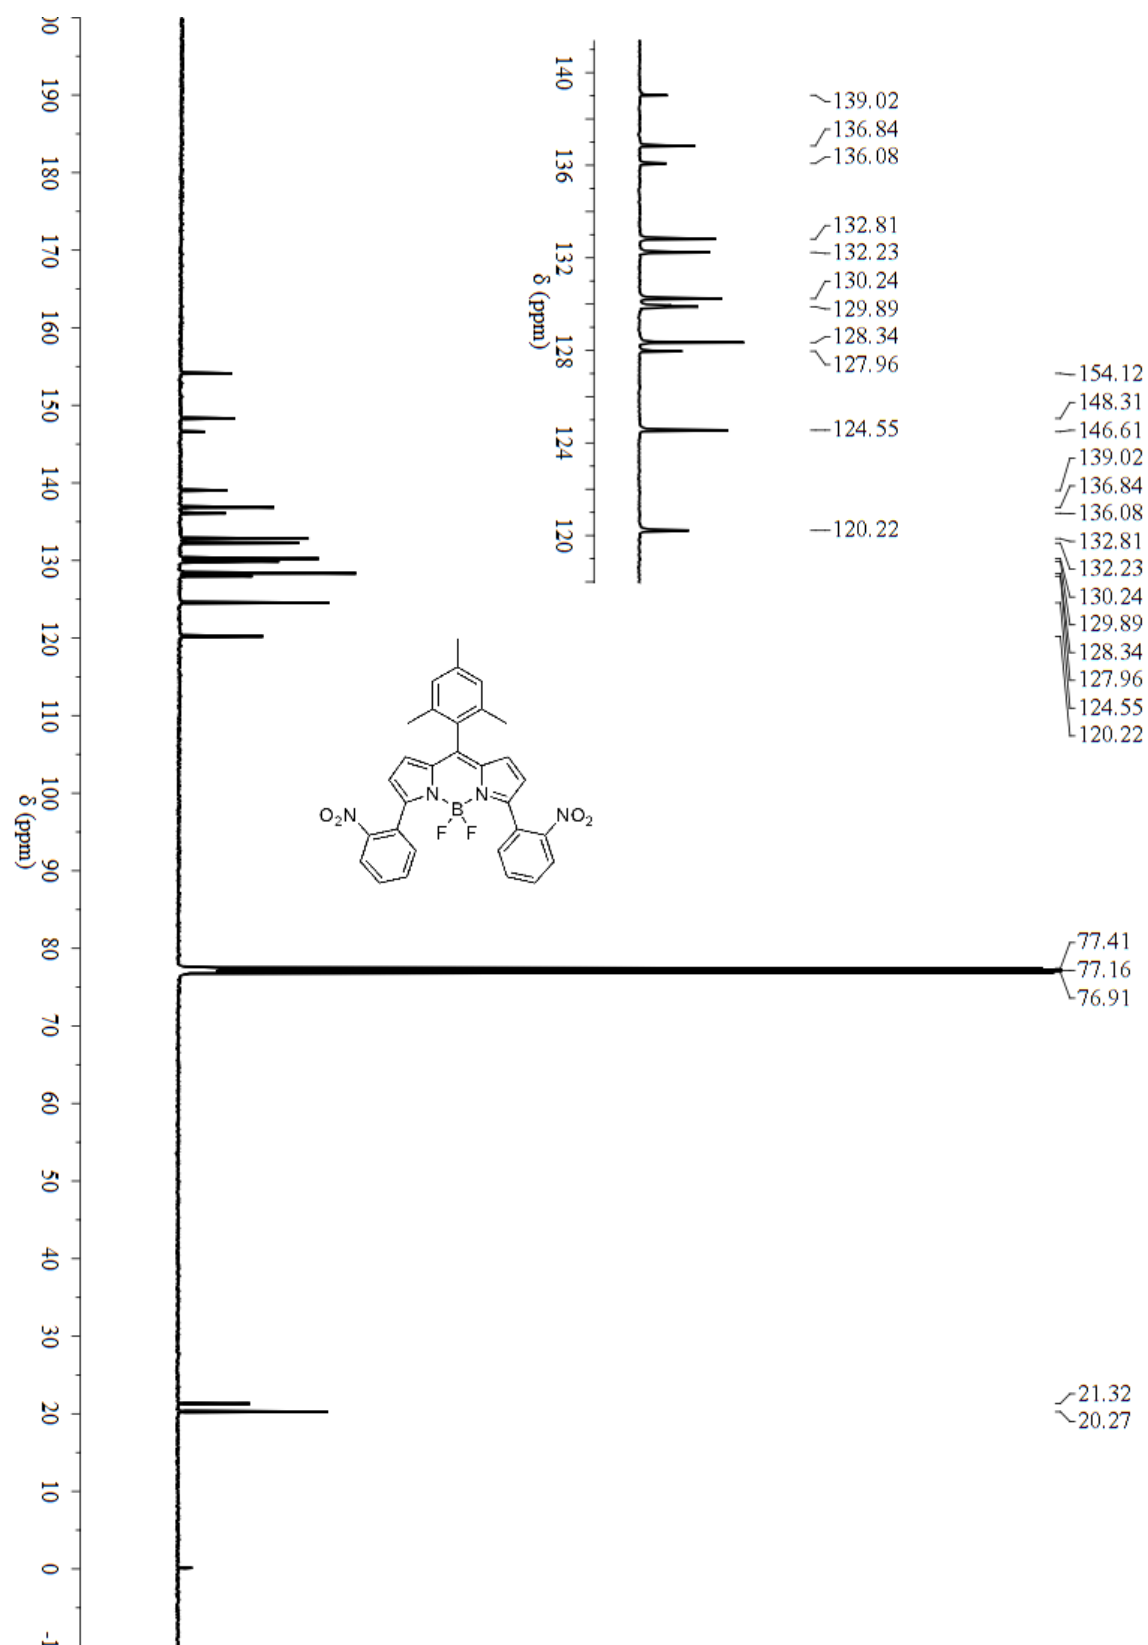

<sup>13</sup>C NMR spectrum of **4n** in CDCl<sub>3</sub>



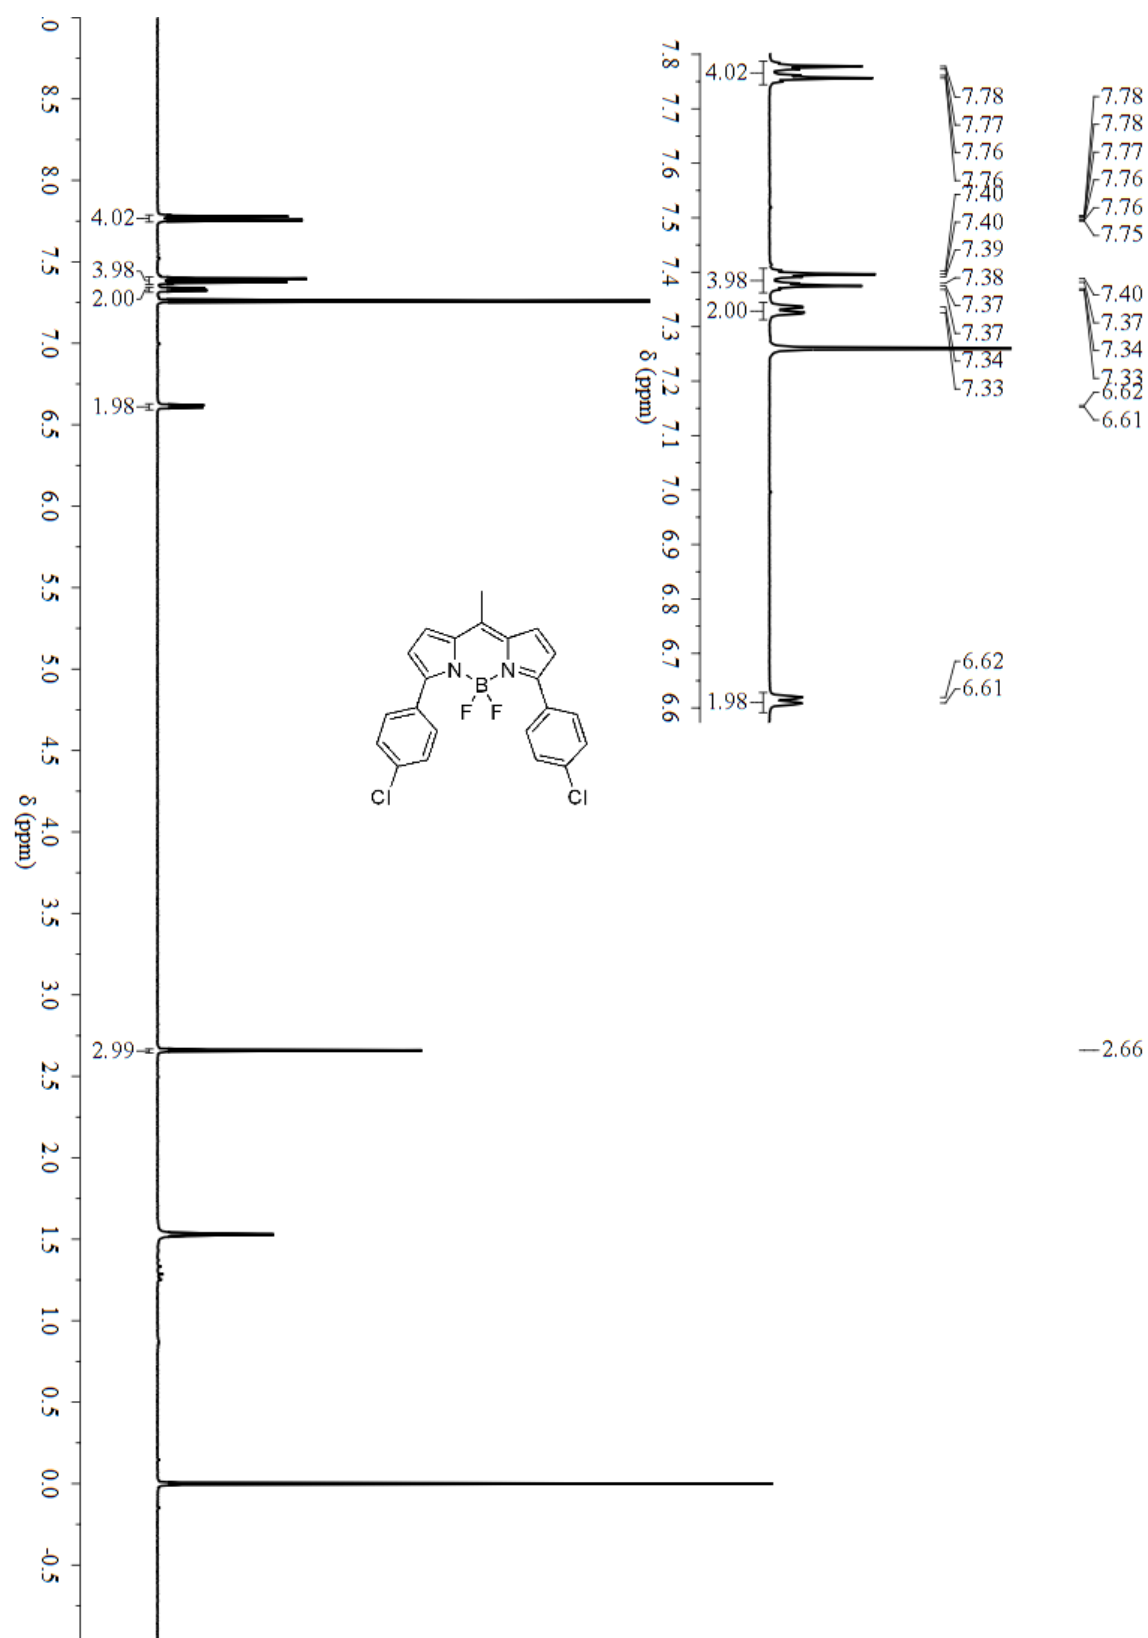

<sup>1</sup>H NMR spectrum of **4o** in CDCl<sub>3</sub>

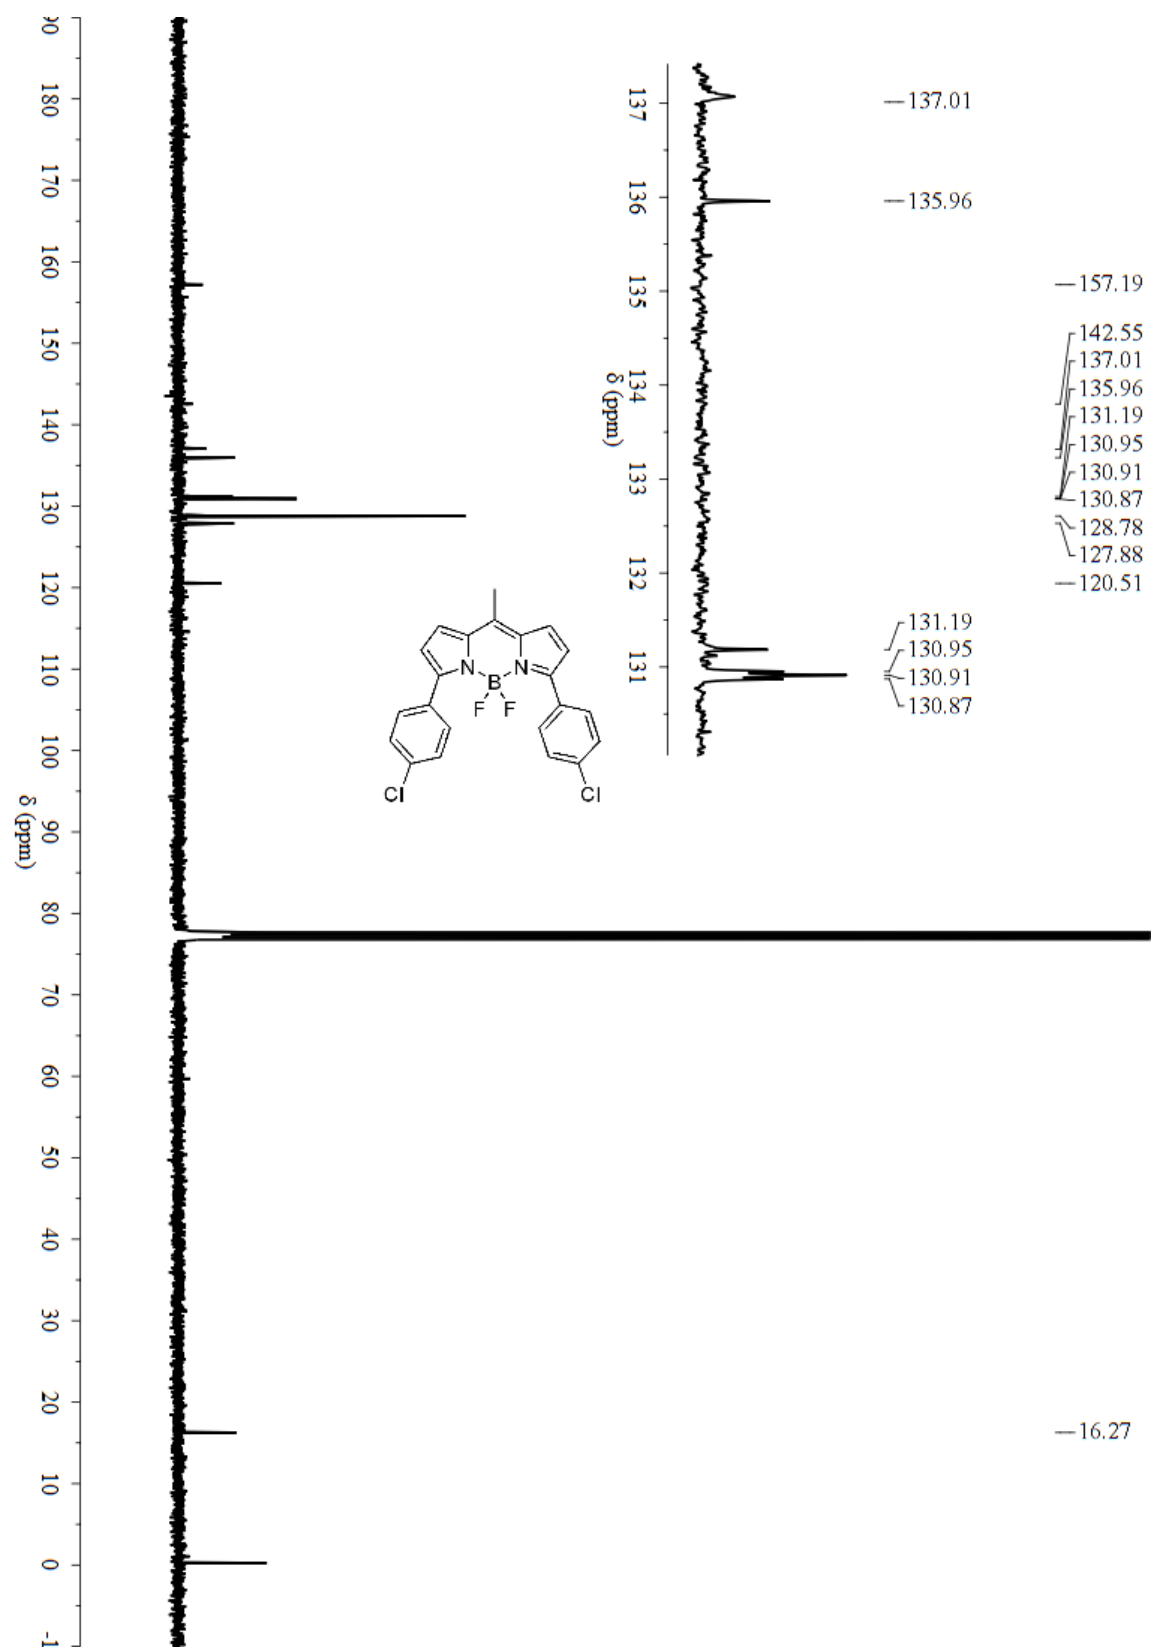

<sup>13</sup>C NMR spectrum of **4o** in CDCl<sub>3</sub>

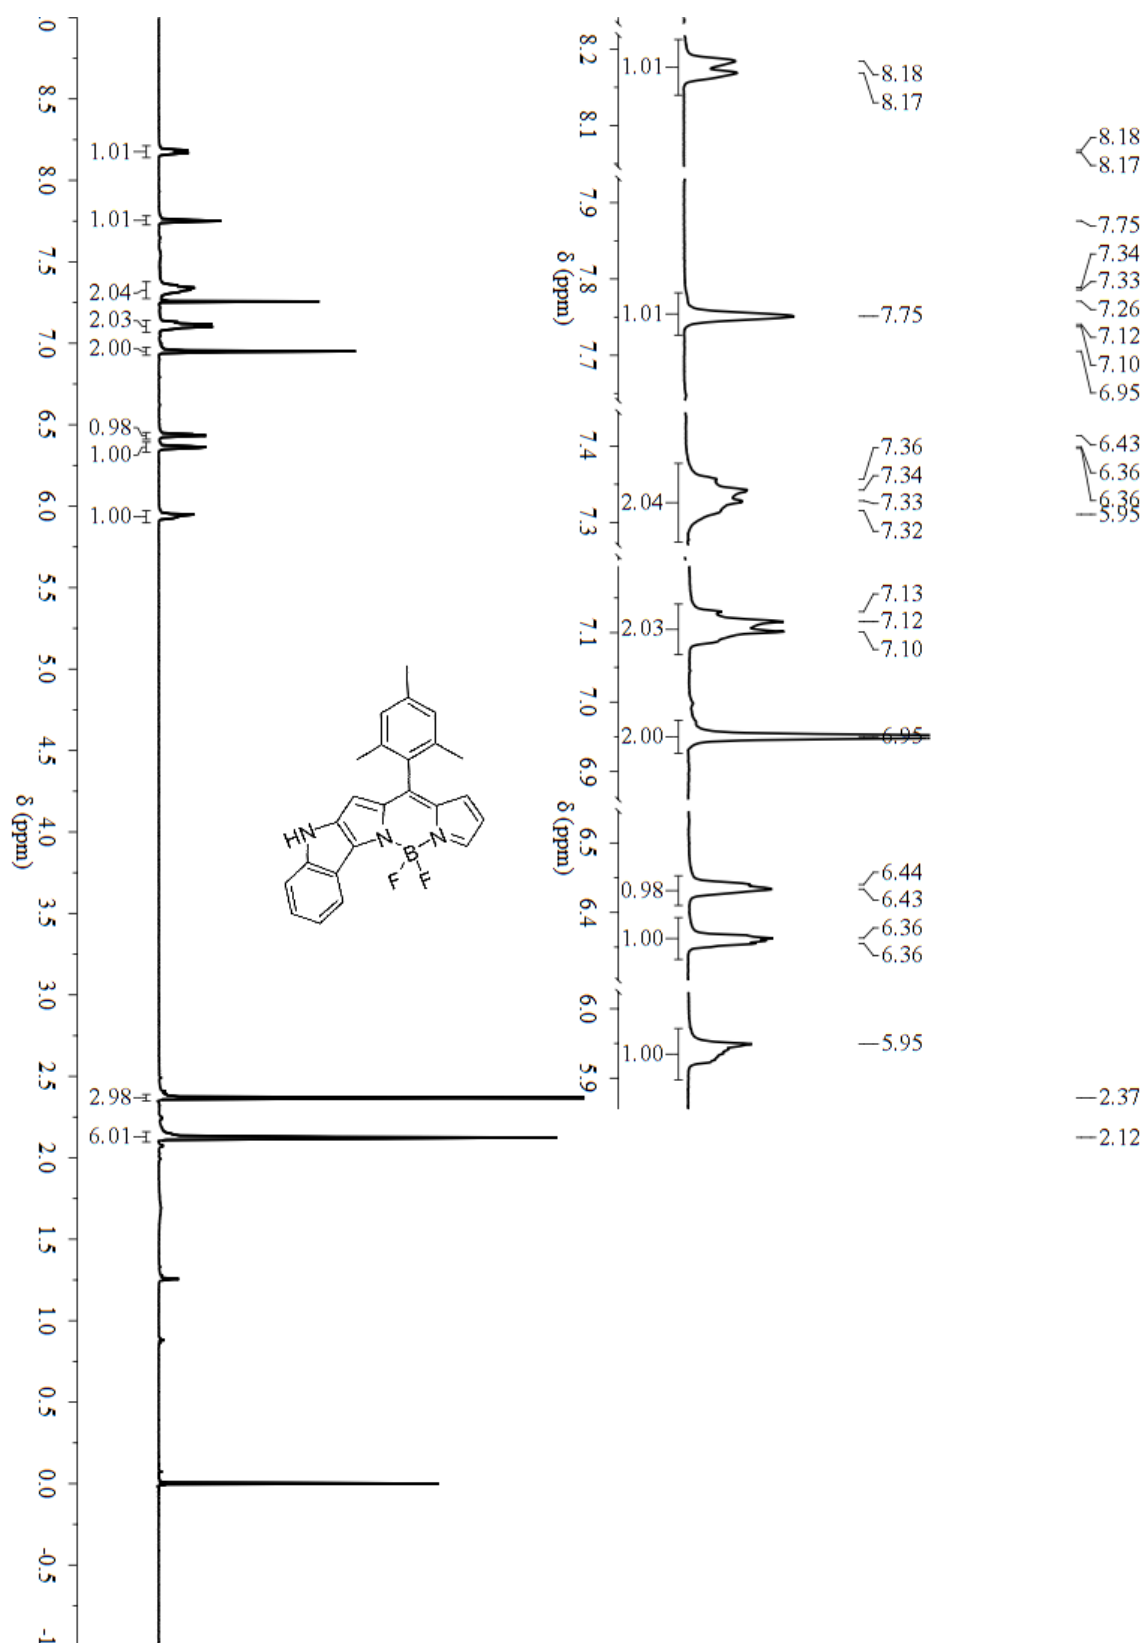

<sup>1</sup>H NMR spectrum of **5a** in CDCl<sub>3</sub>

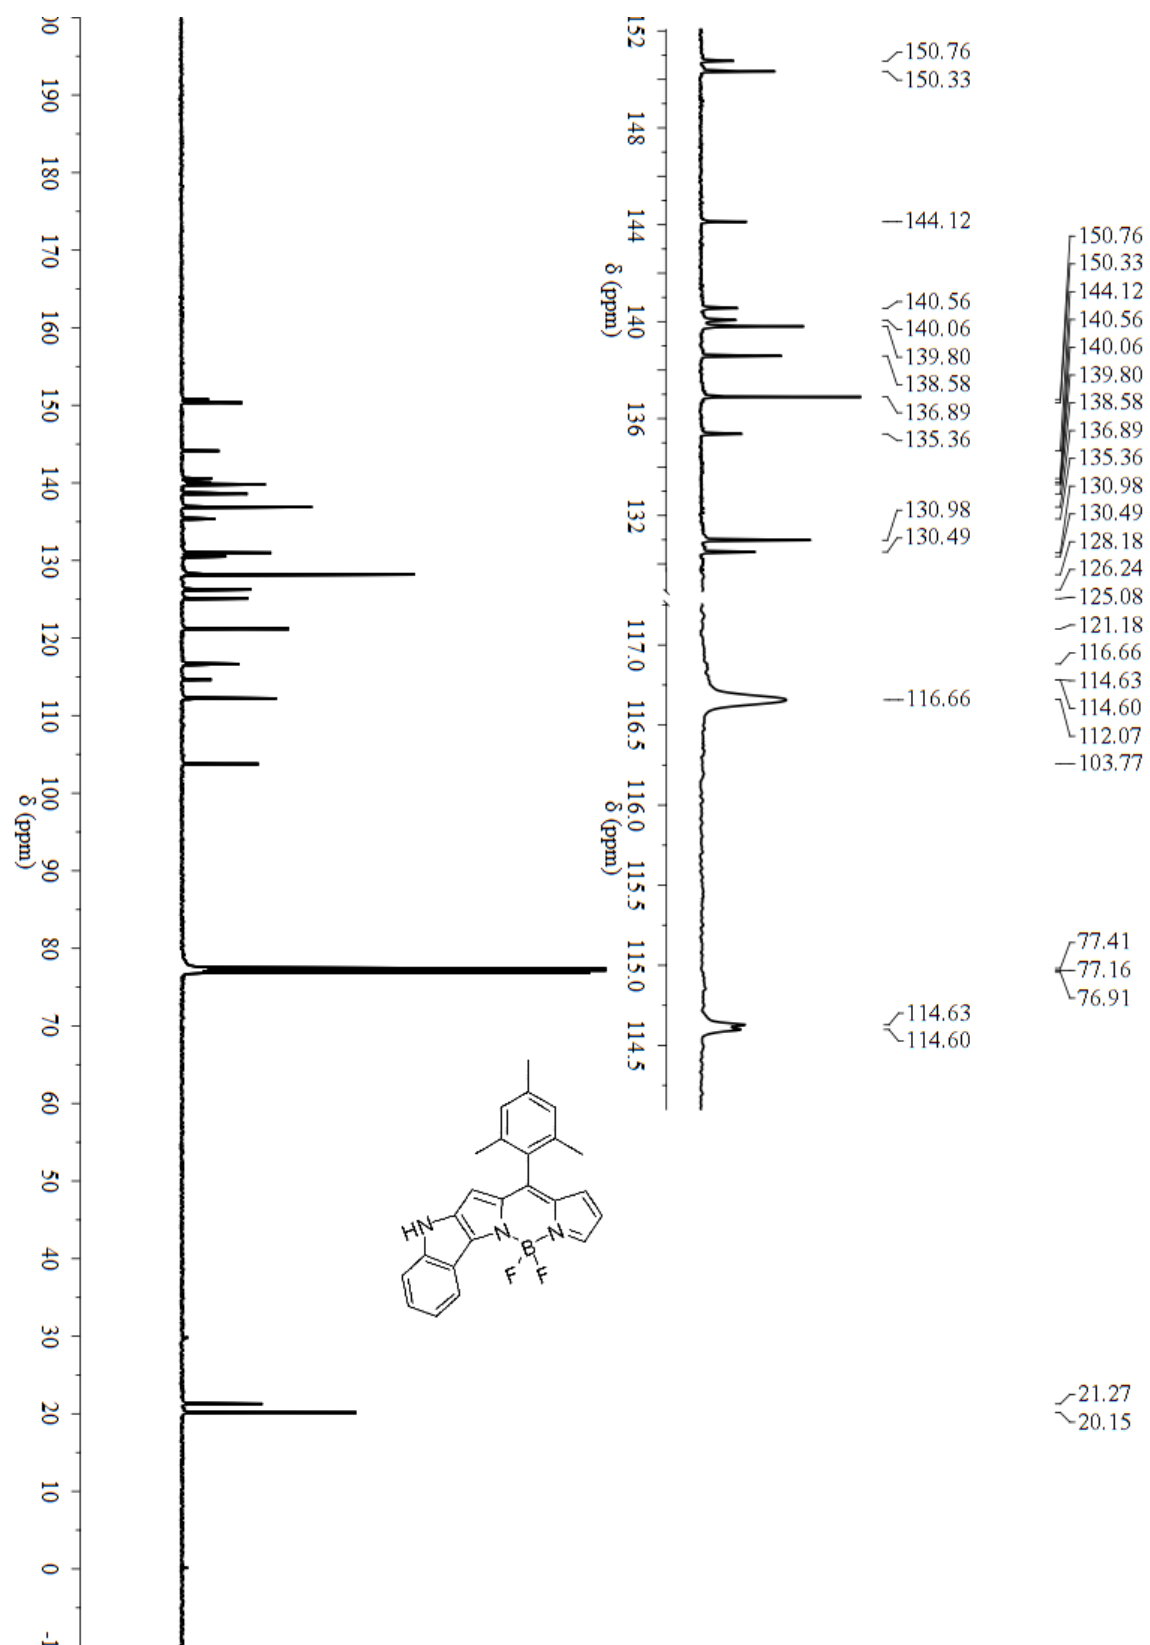

<sup>13</sup>C NMR spectrum of **5a** in CDCl<sub>3</sub>

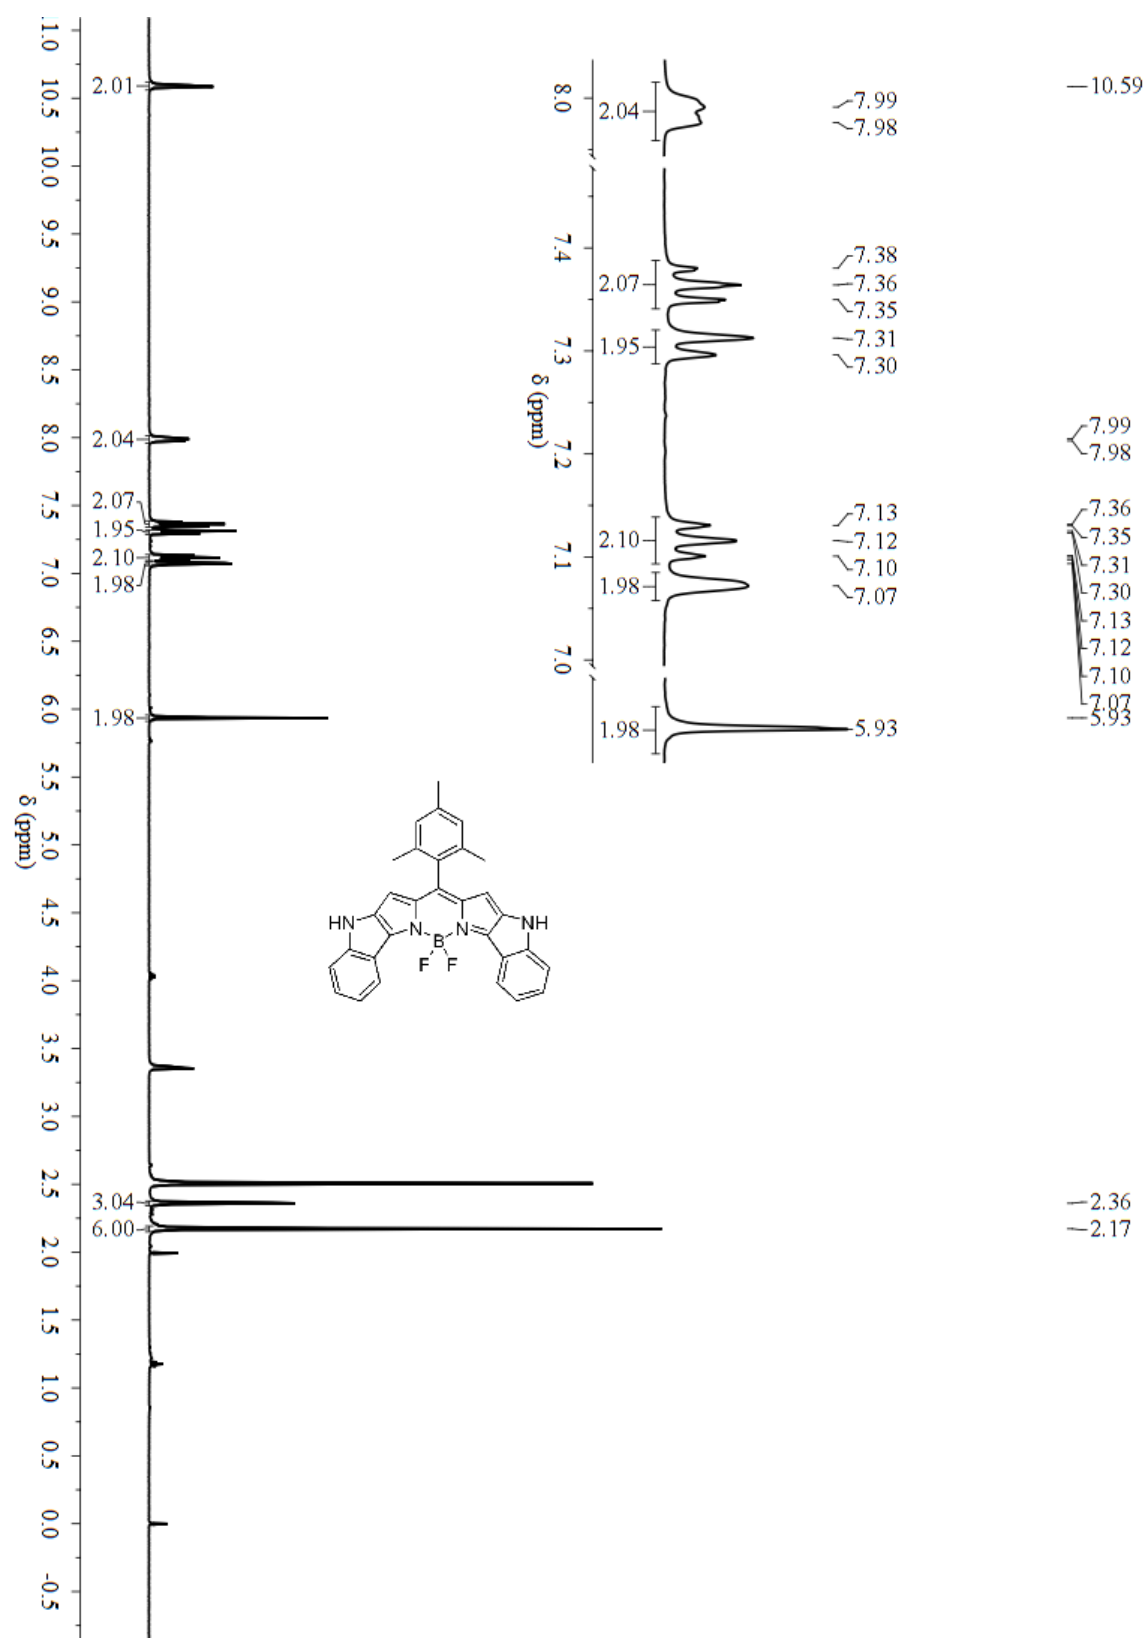

<sup>1</sup>H NMR spectrum of **5b** in d<sub>6</sub>-DMSO

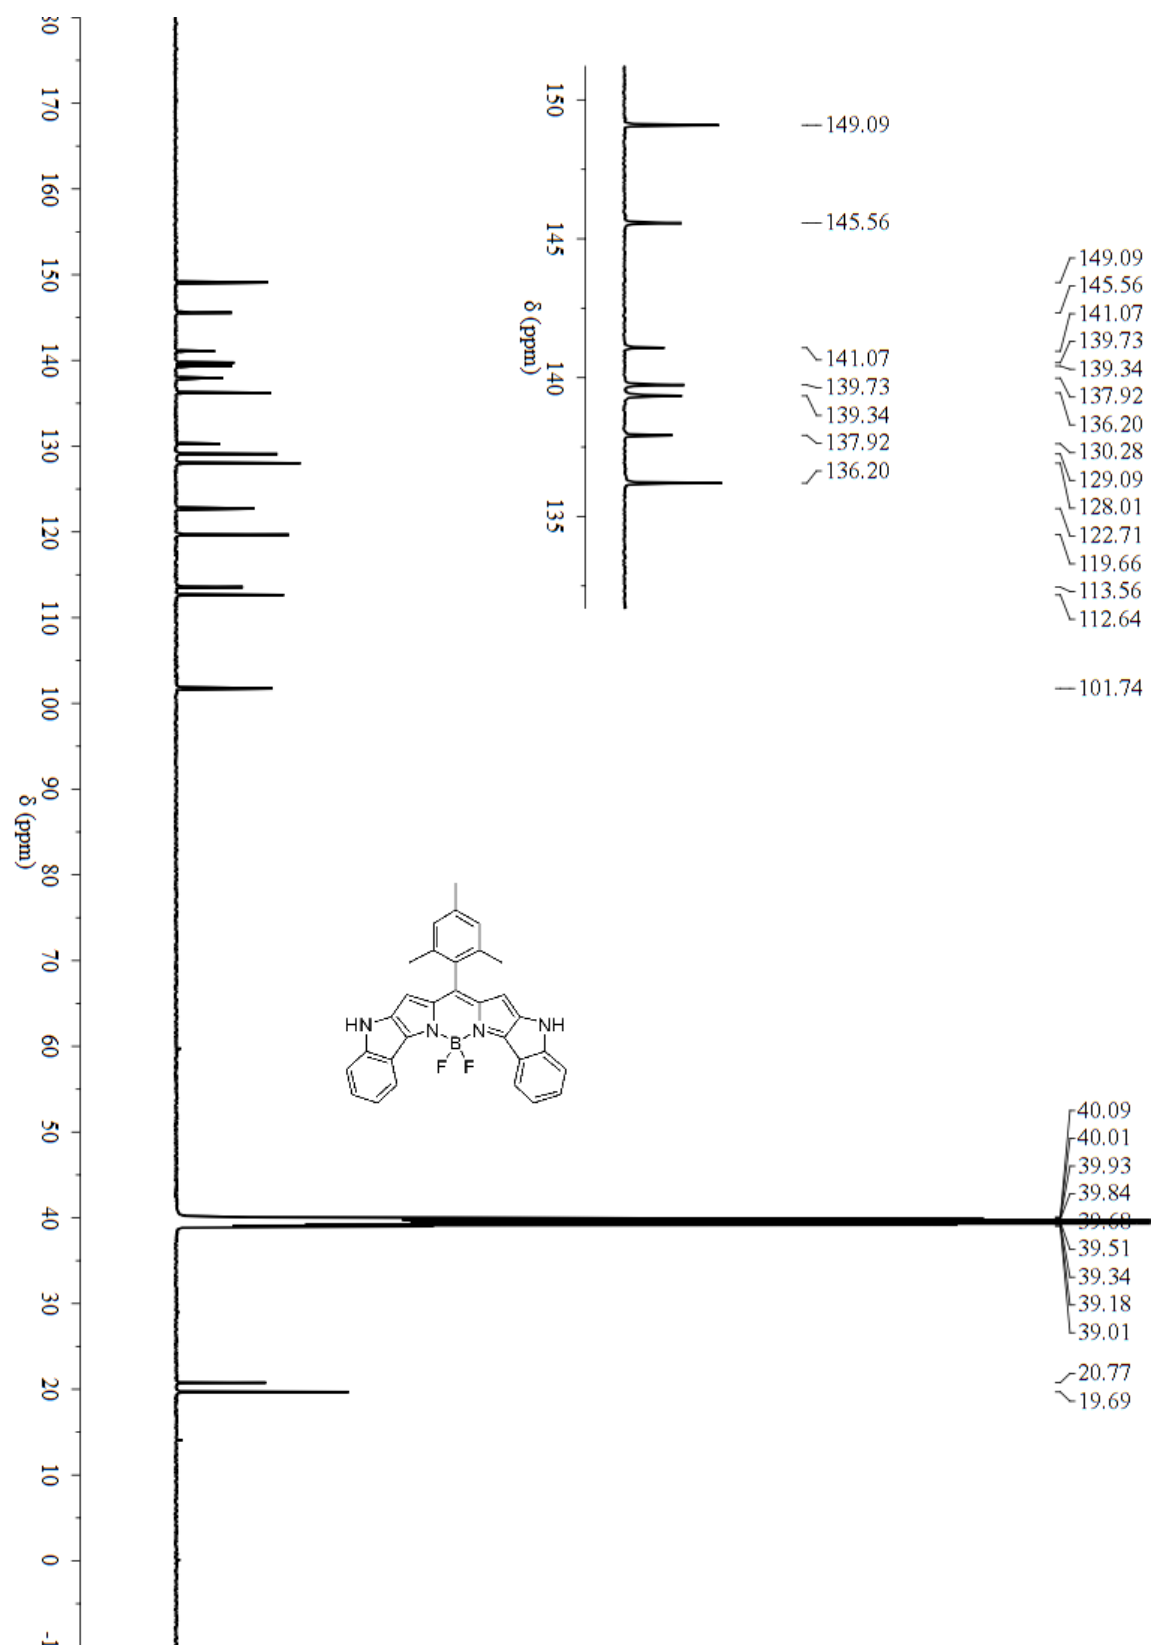

<sup>13</sup>C NMR spectrum of **5b** in d<sub>6</sub>-DMSO

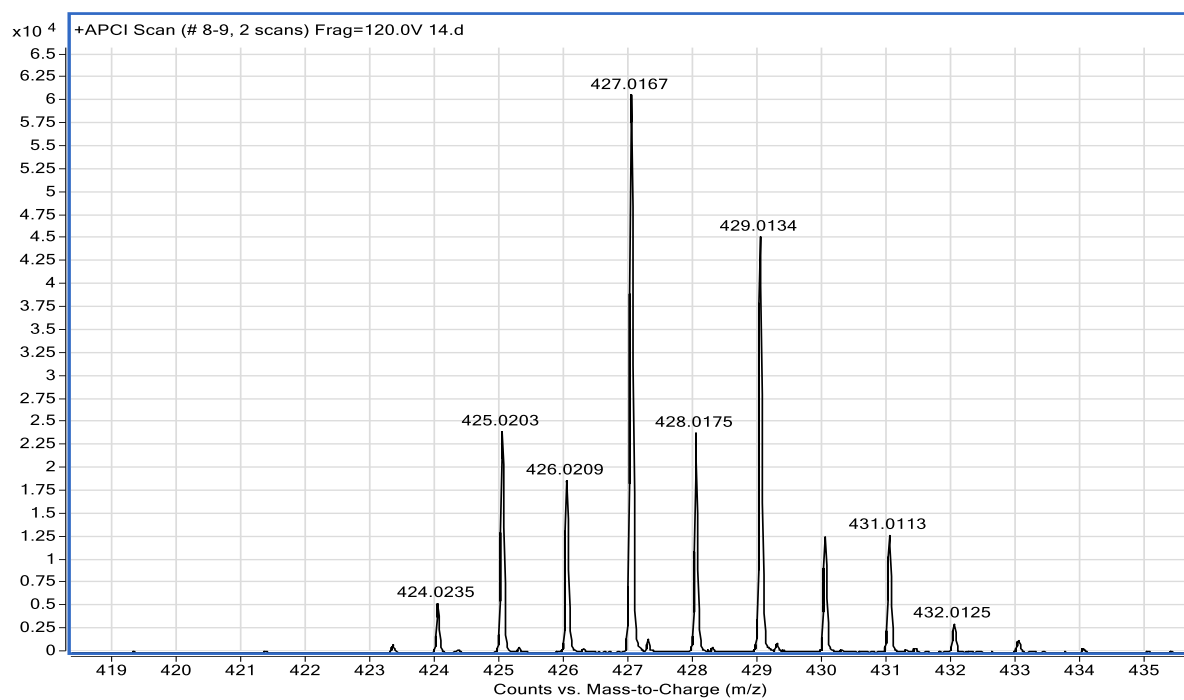

HRMS for **3a**

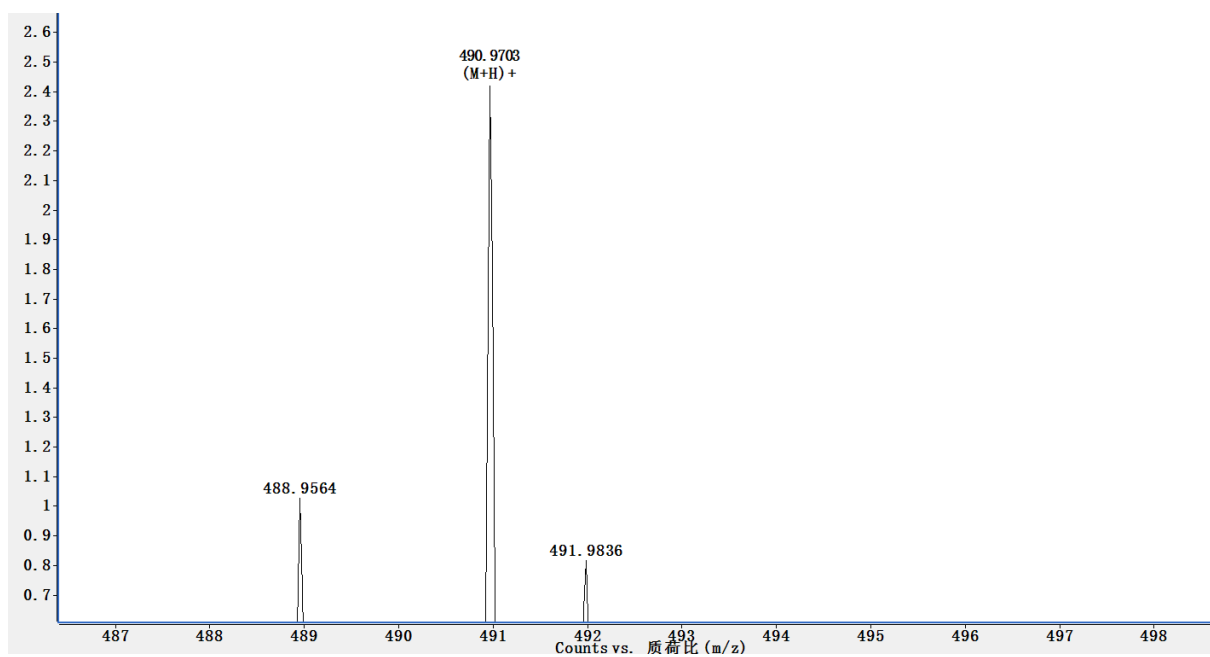

HRMS for **3b**

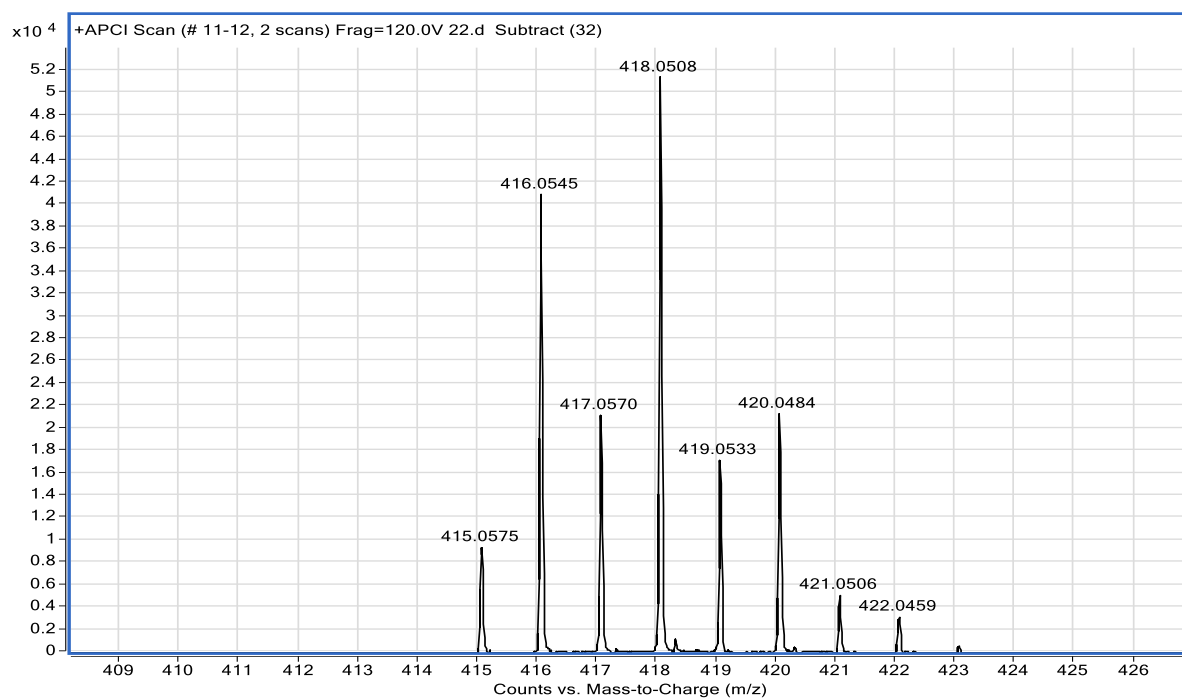

HRMS for **3c**

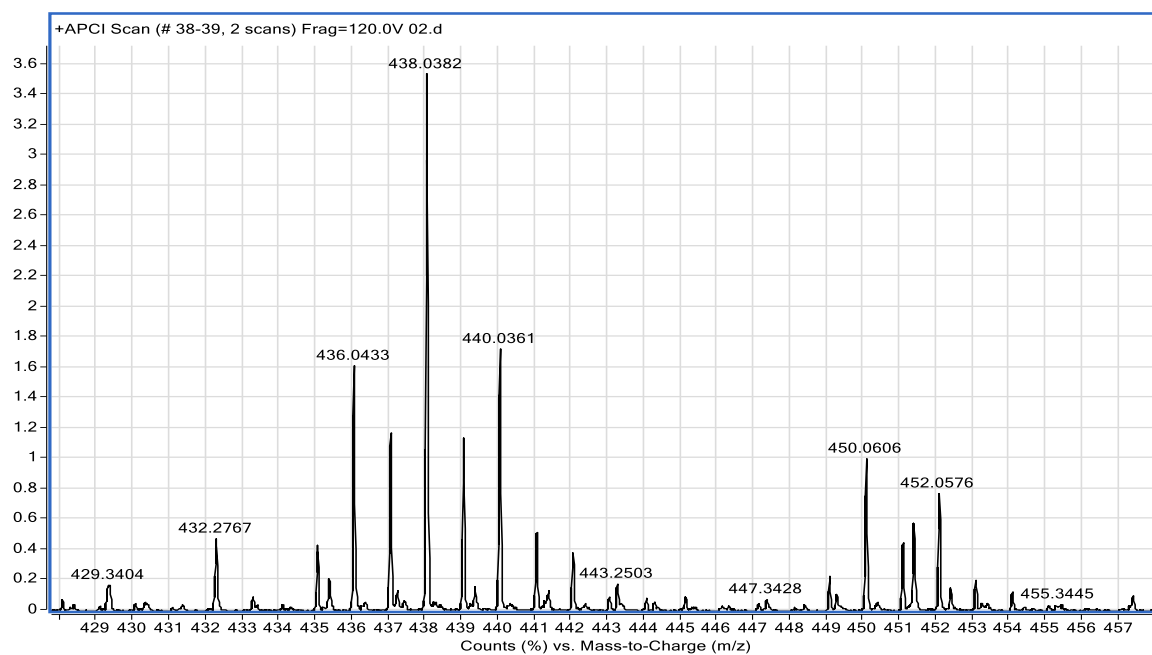

HRMS for **3d**



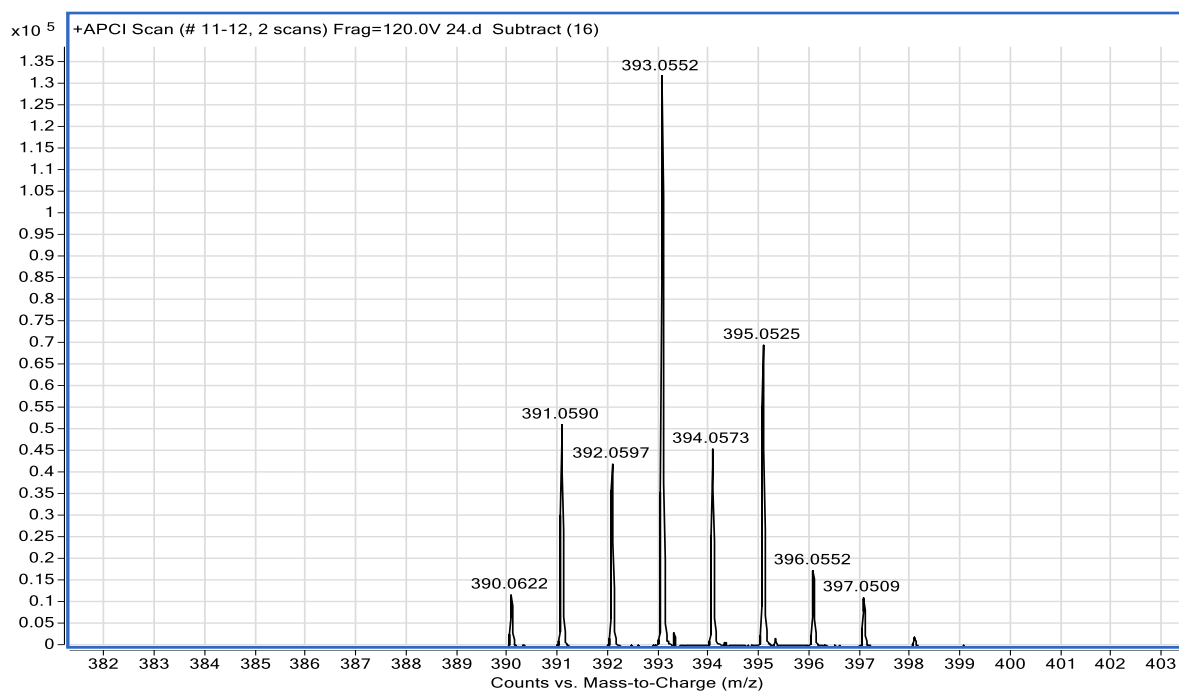

HRMS for **3e**

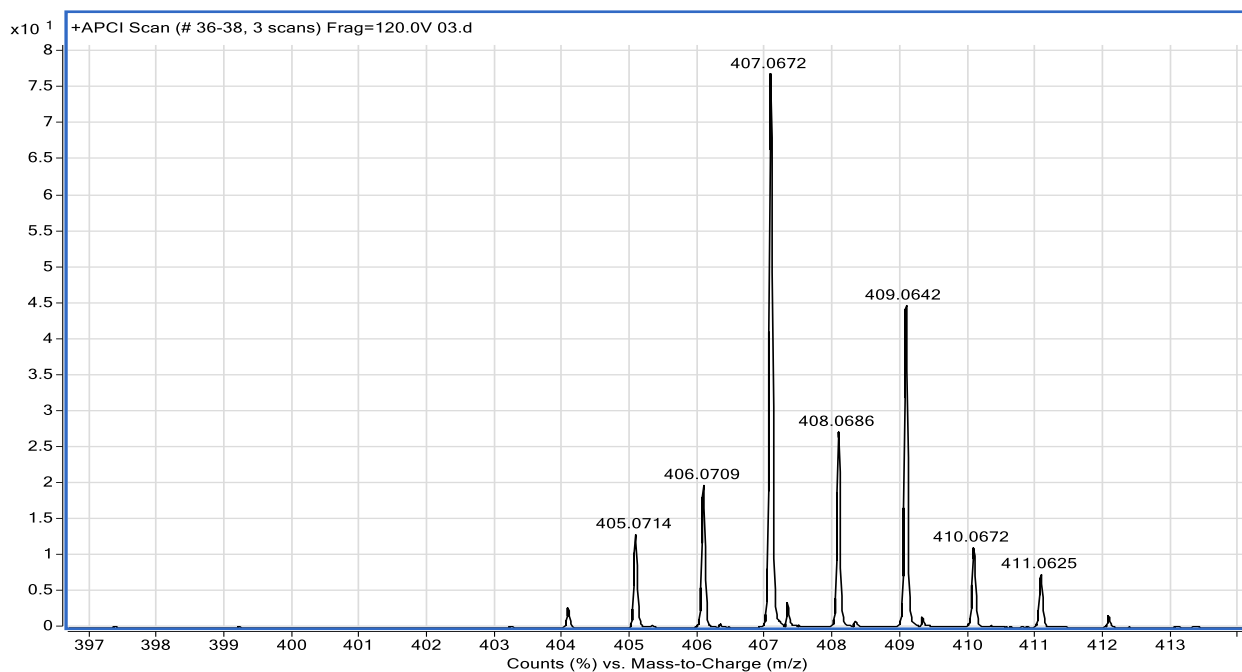

HRMS for **3f**

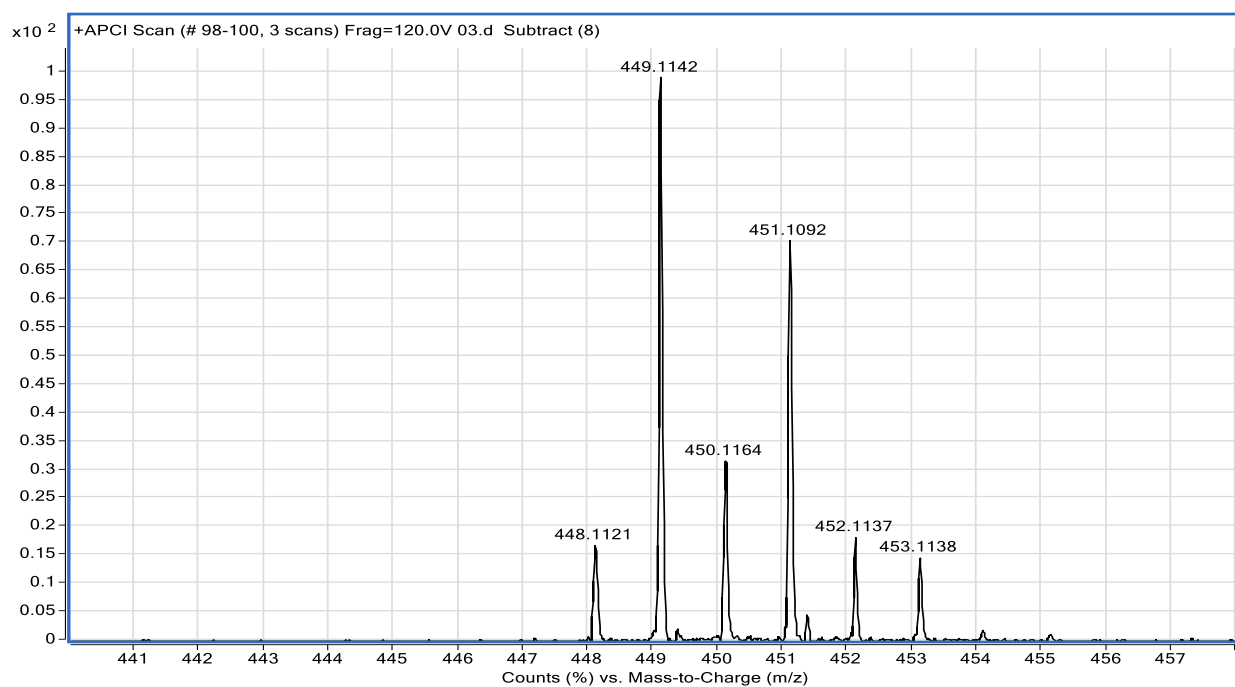

HRMS for **3g**

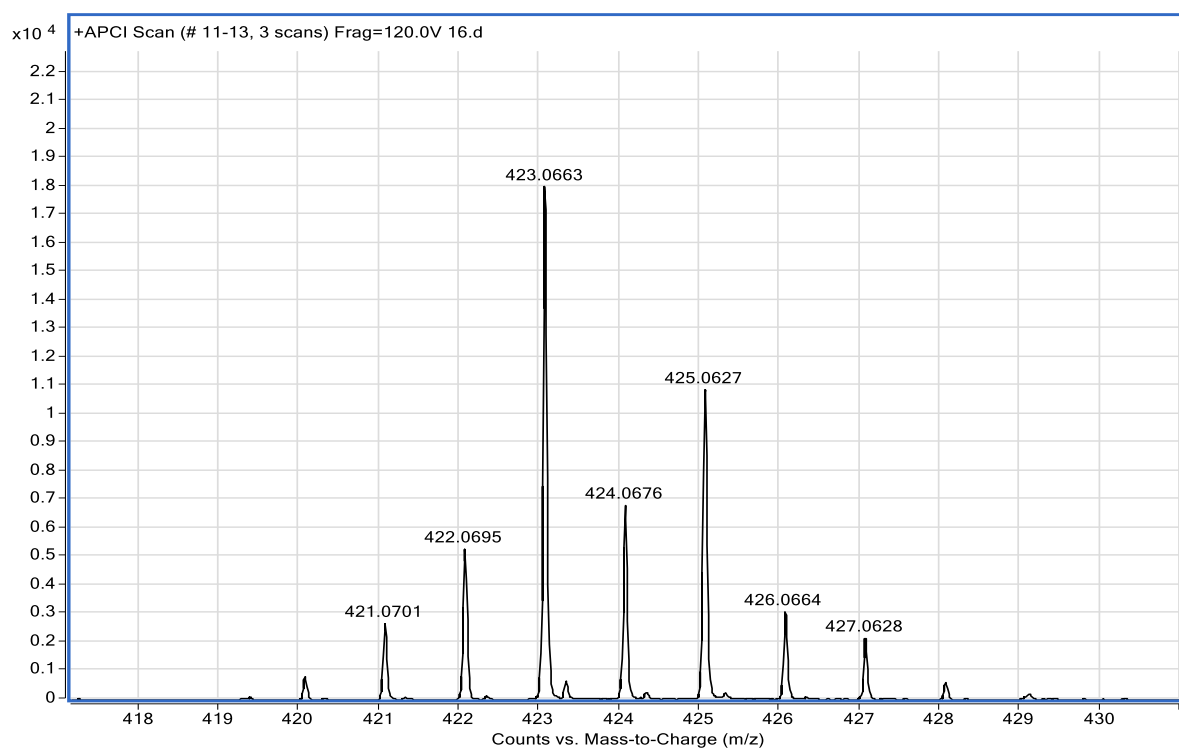

HRMS for **3h**

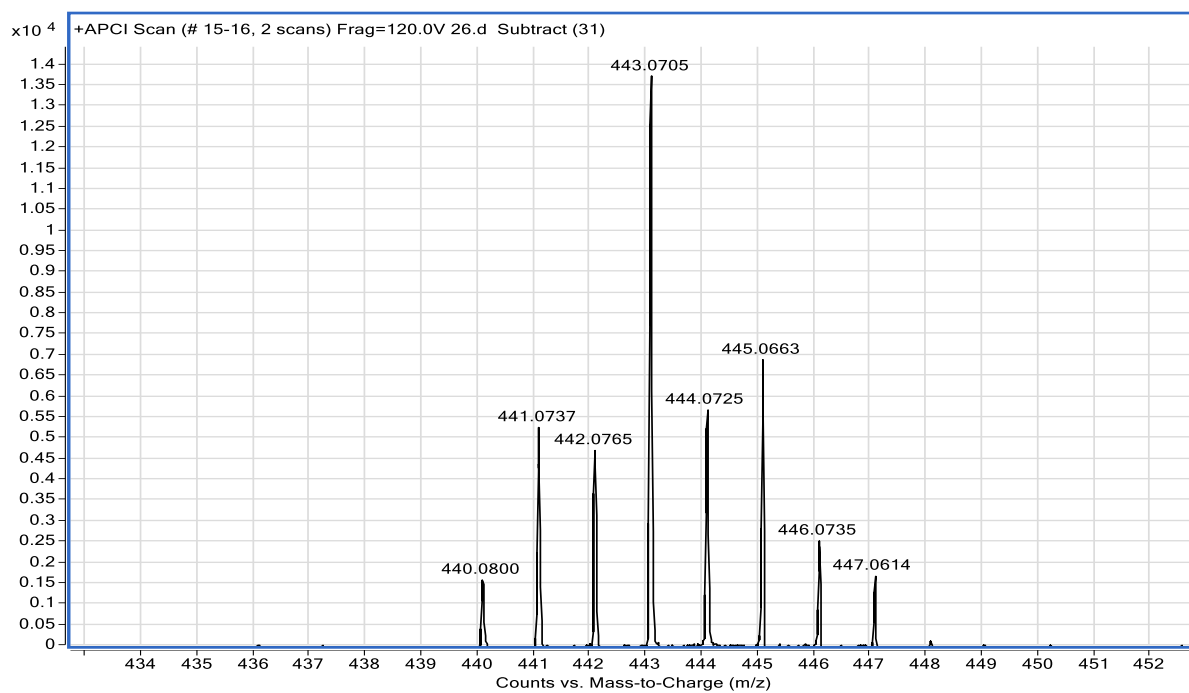

HRMS for **3i**

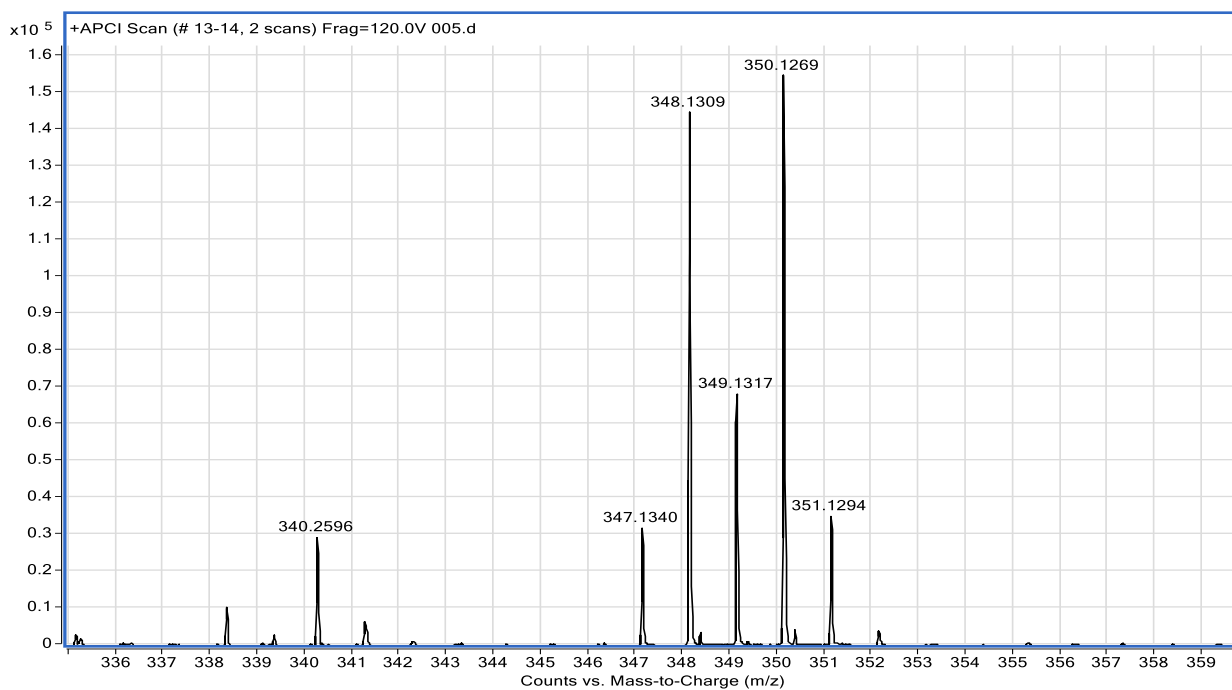

HRMS for **3j**

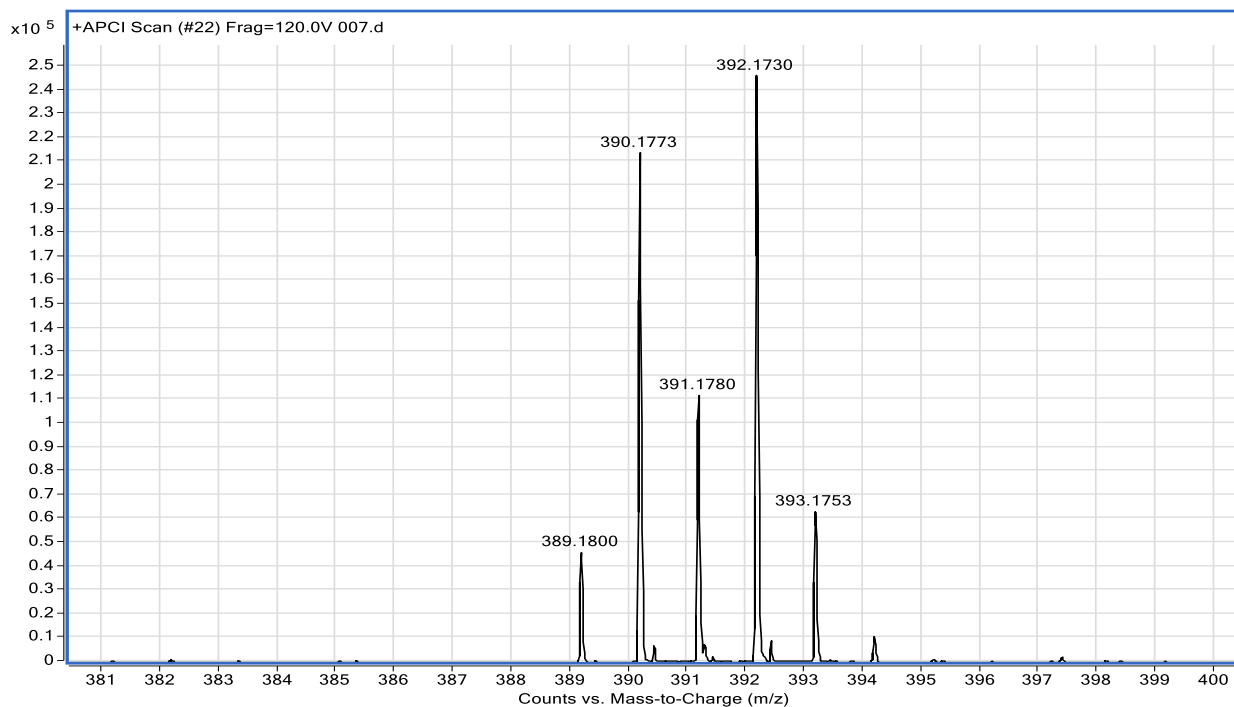

HRMS for **3k**

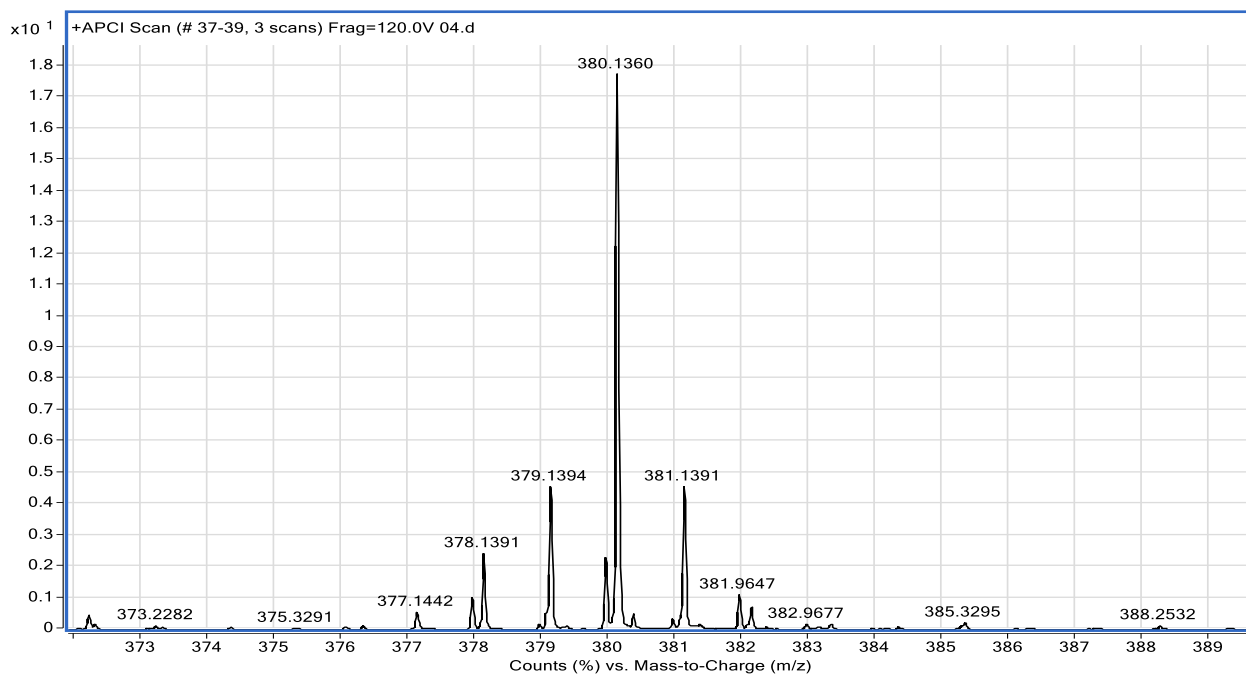

HRMS for **3l**

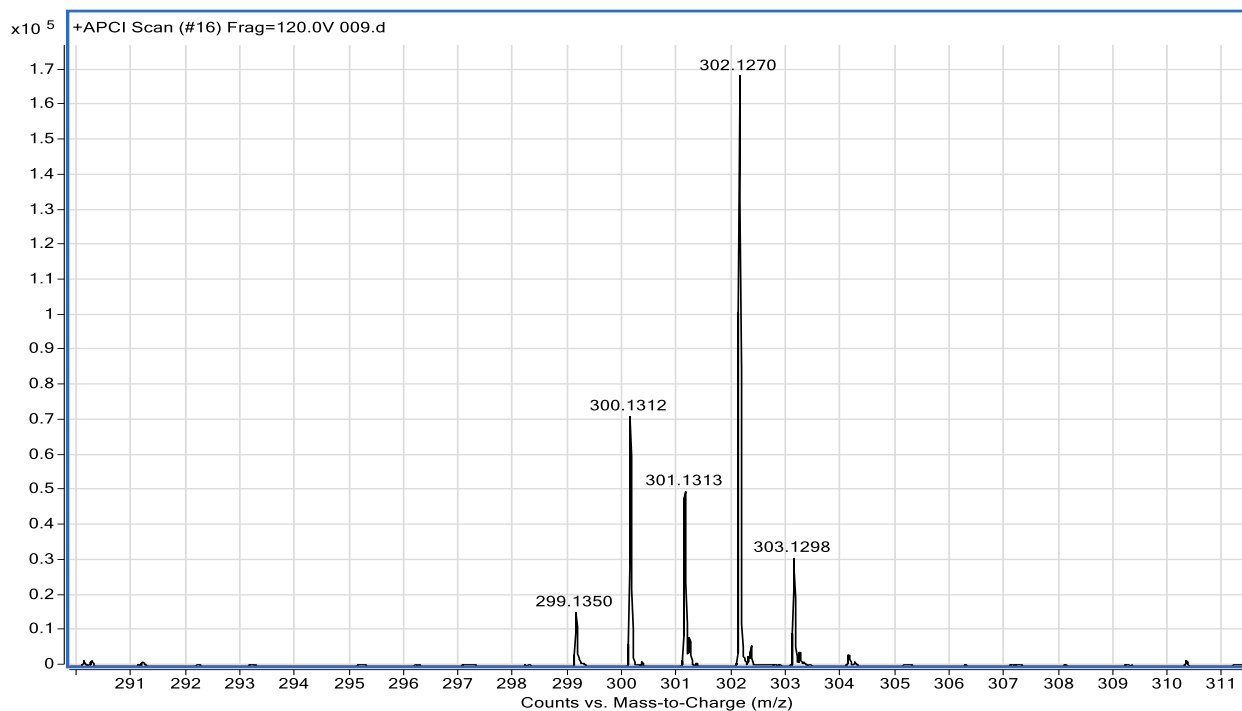

HRMS for **3m**

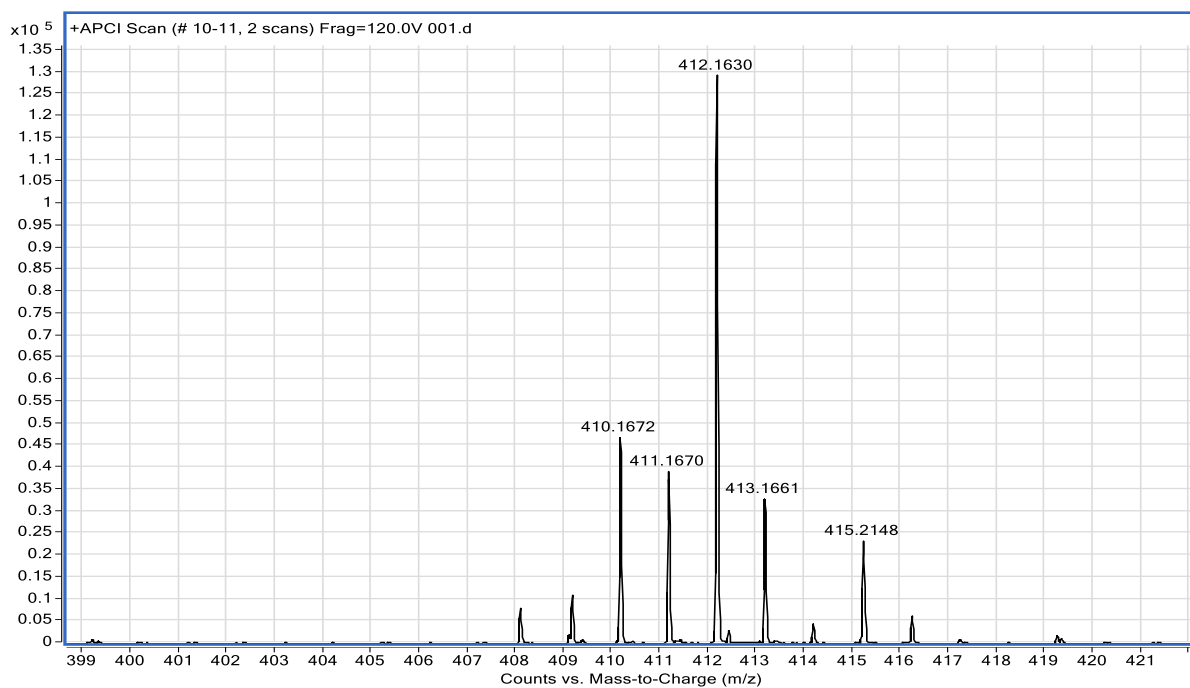

HRMS for **3n**

00005\_190620152341 #22 RT: 0.31 AV: 1 NL: 4.55E6  
T: FTMS + p ESI Full ms [100.00-1000.00]

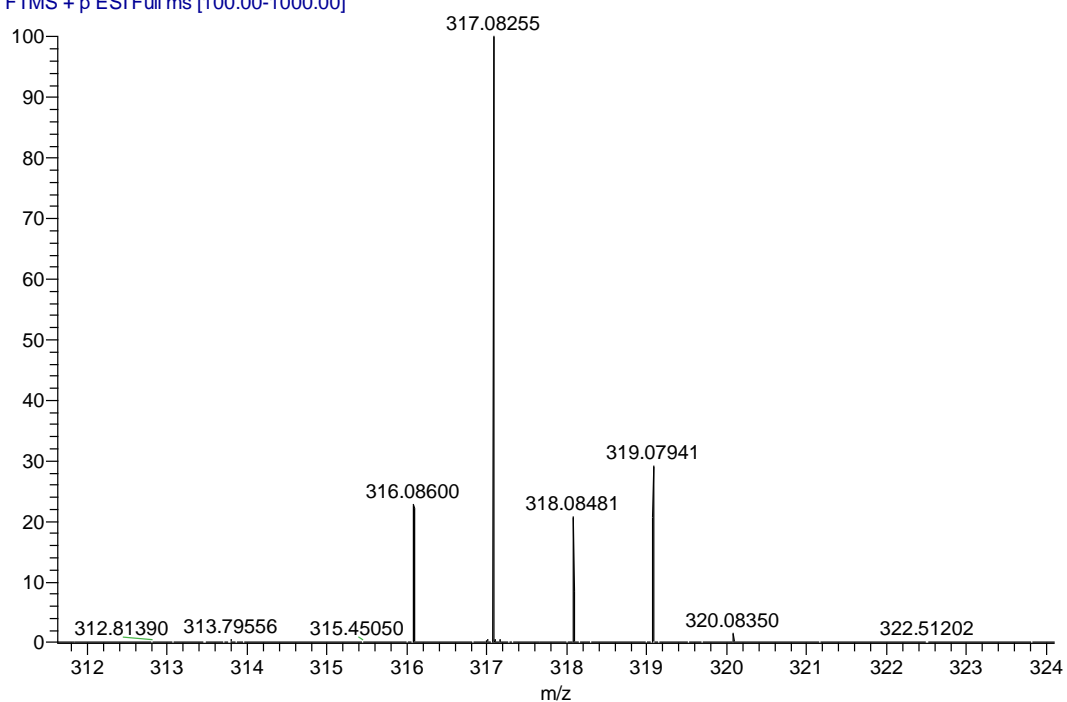

HRMS for 3o

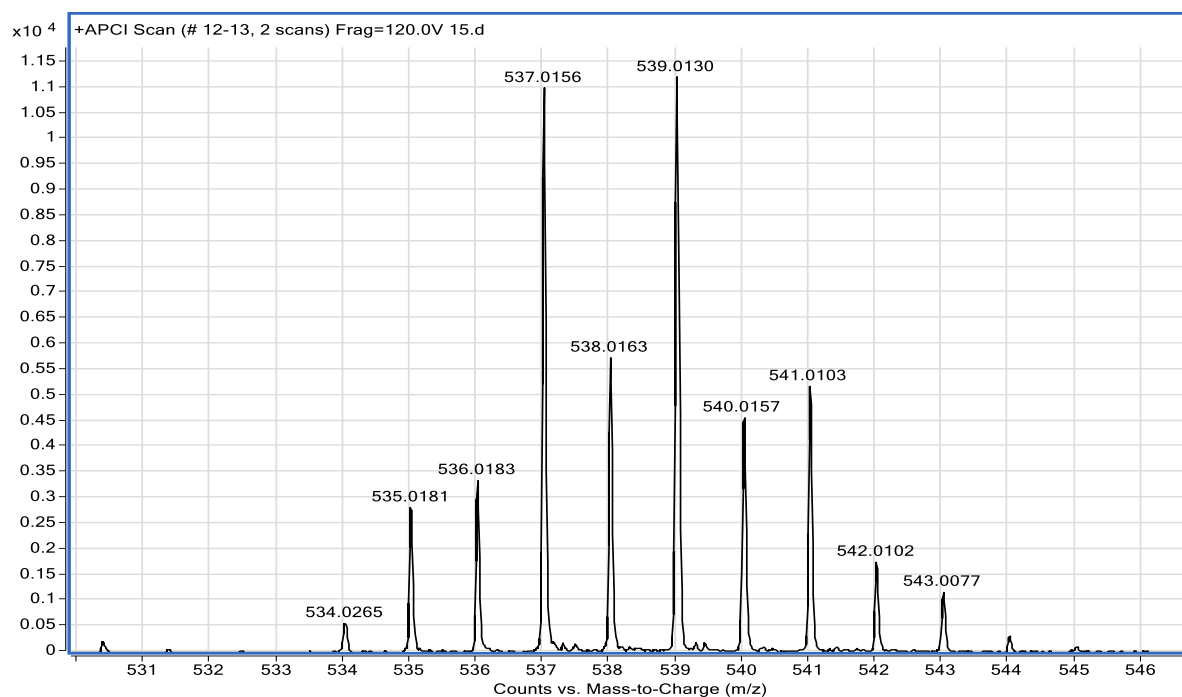

HRMS for 4a

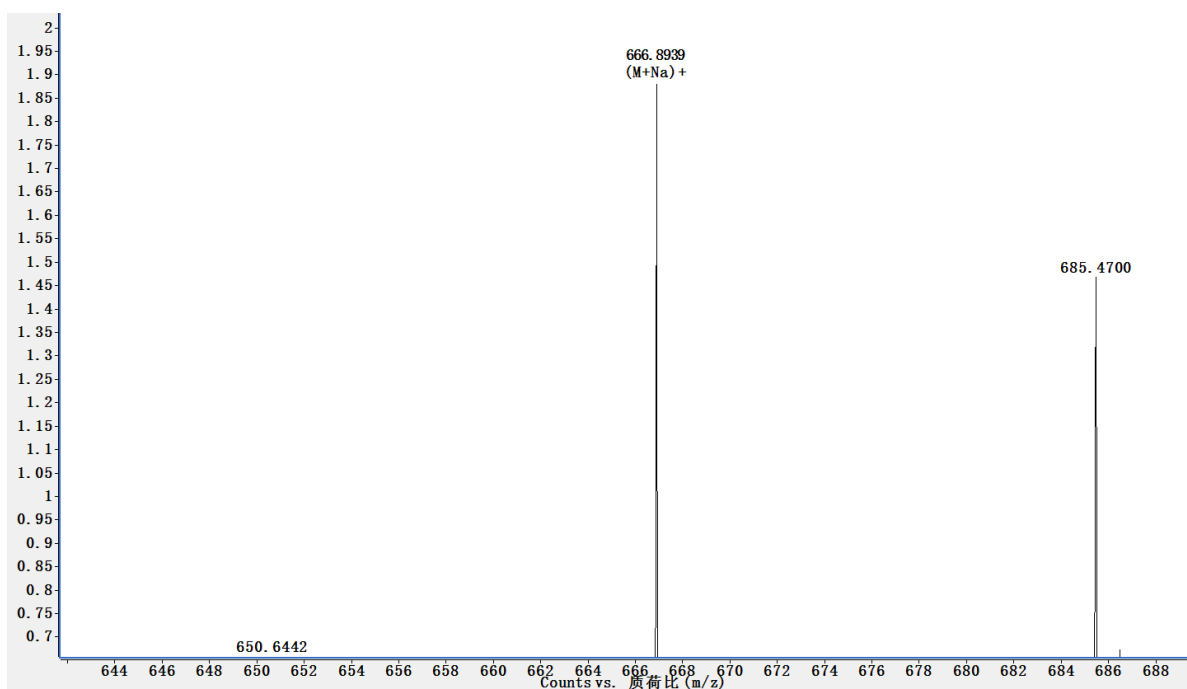

HRMS for **4b**

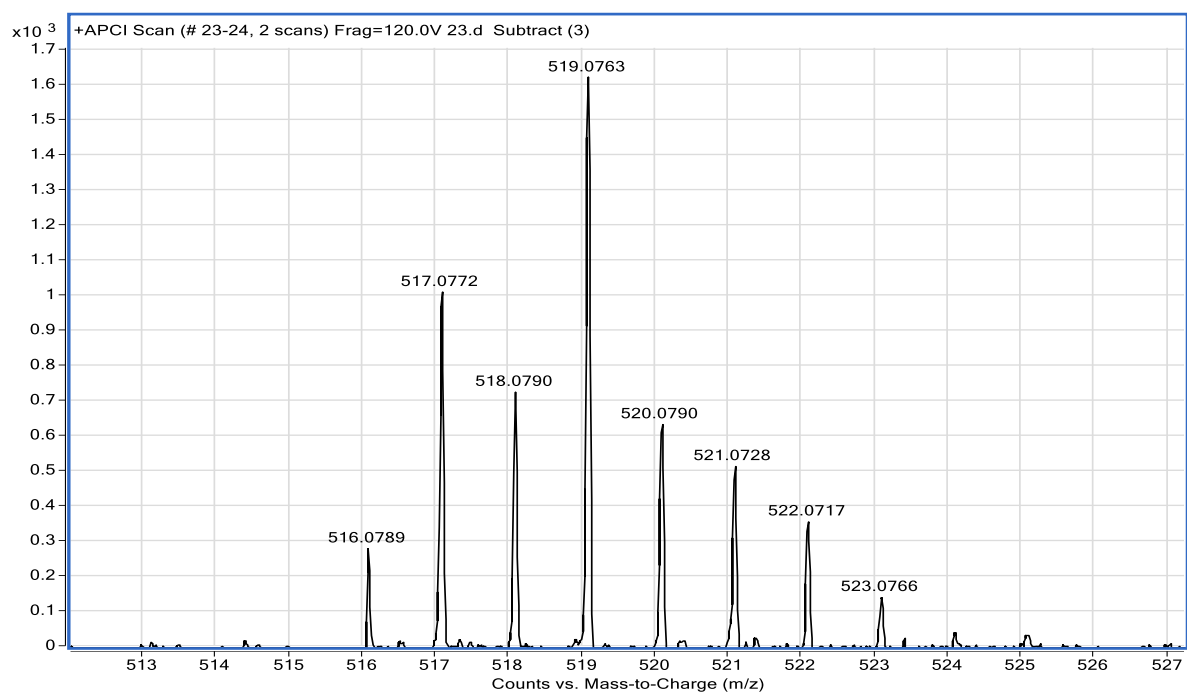

HRMS for **4c**

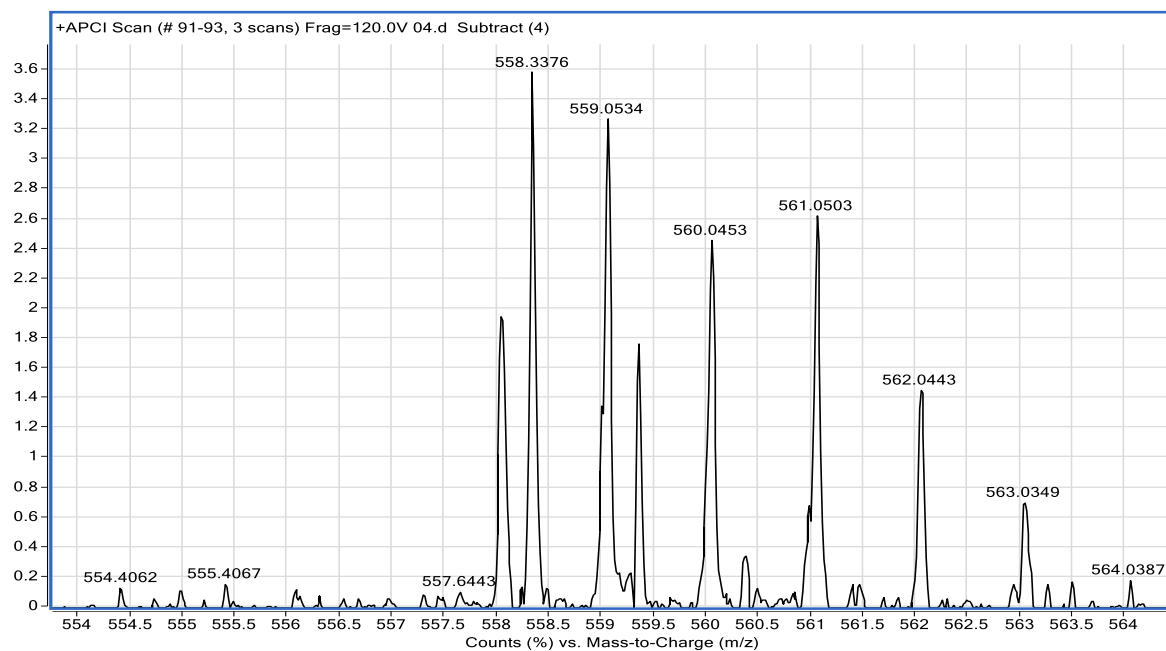

HRMS for **4d**

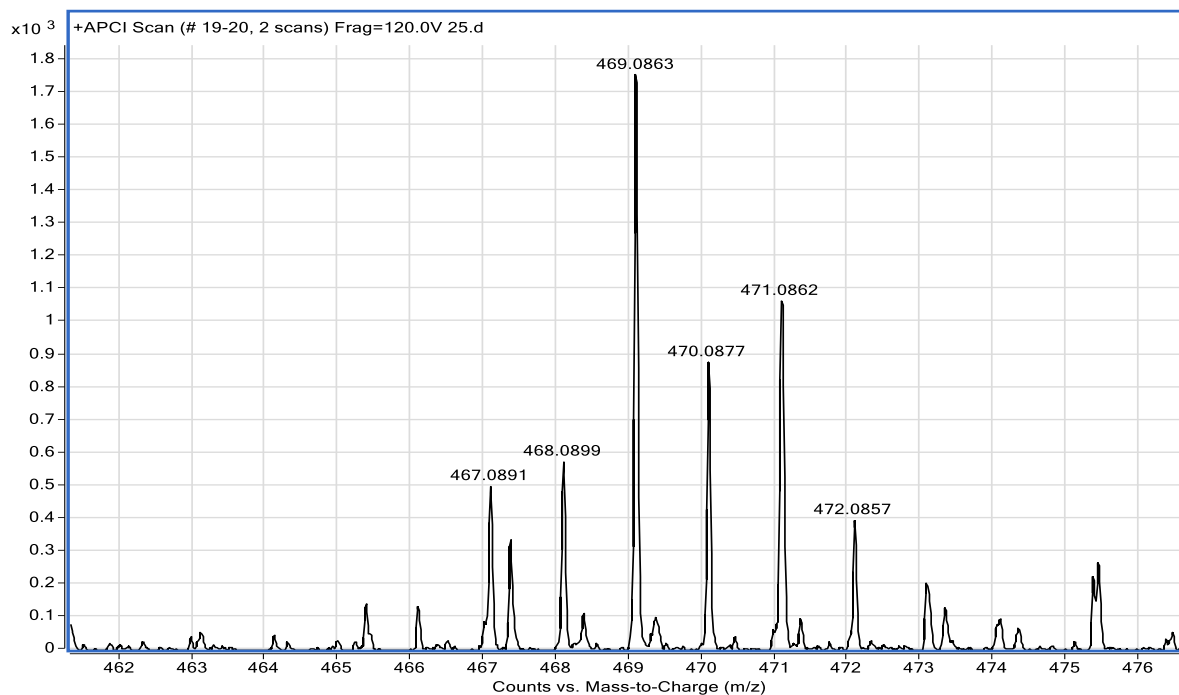

HRMS for **4e**



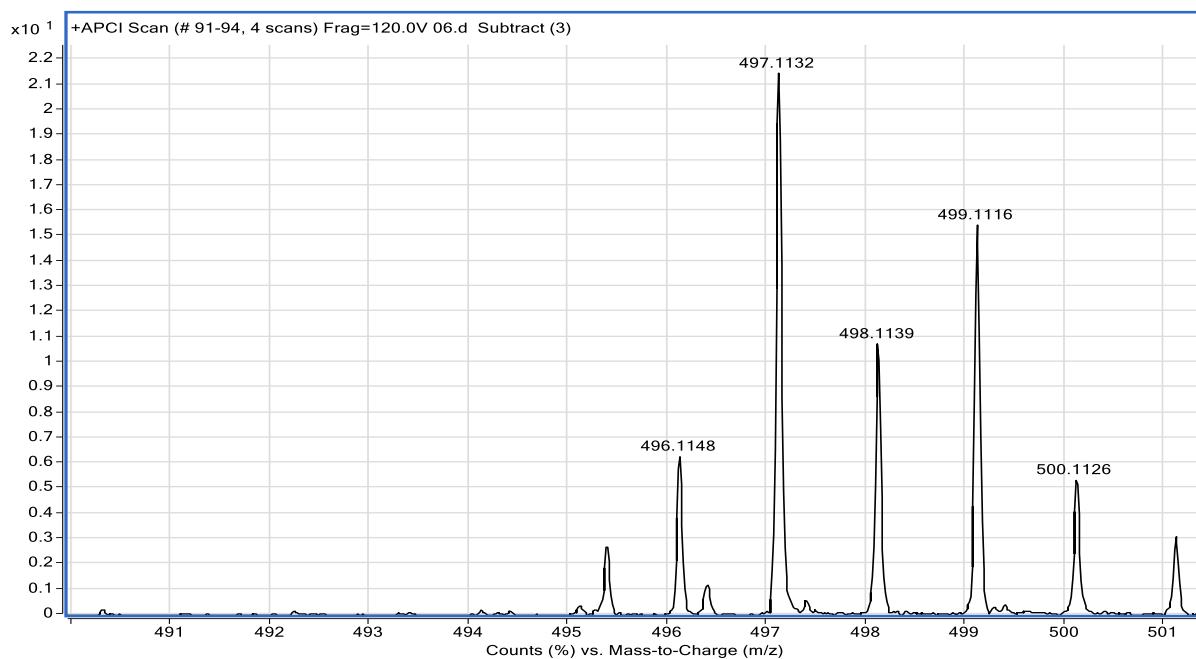

HRMS for **4f**

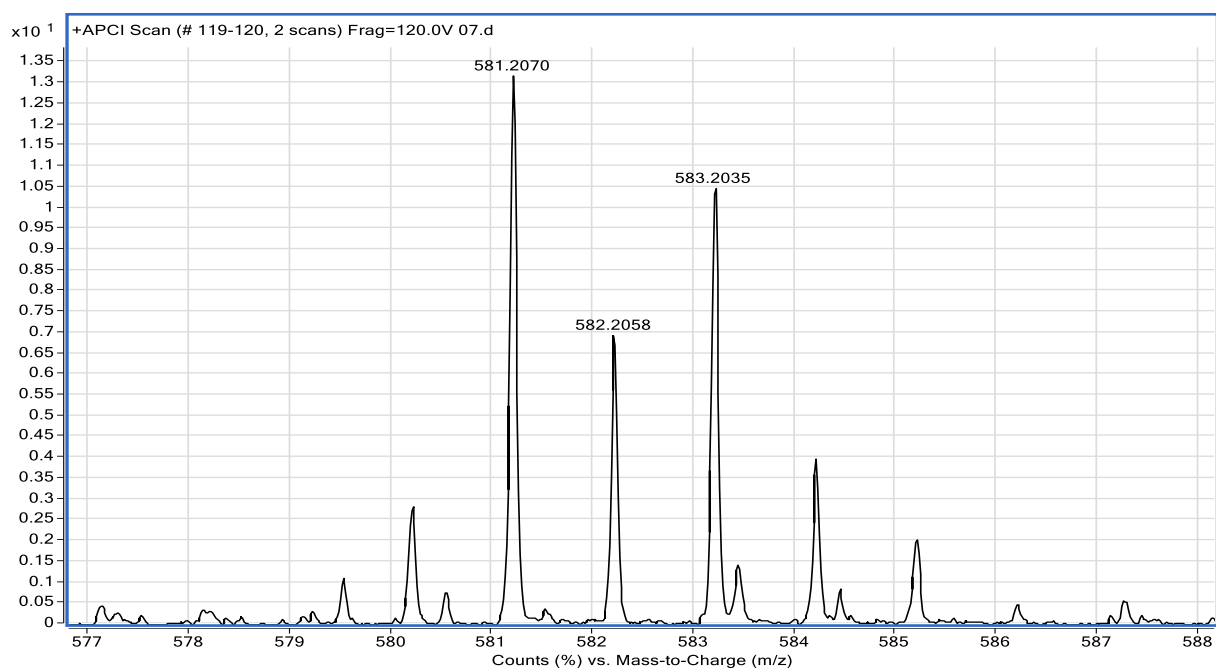

HRMS for **4g**

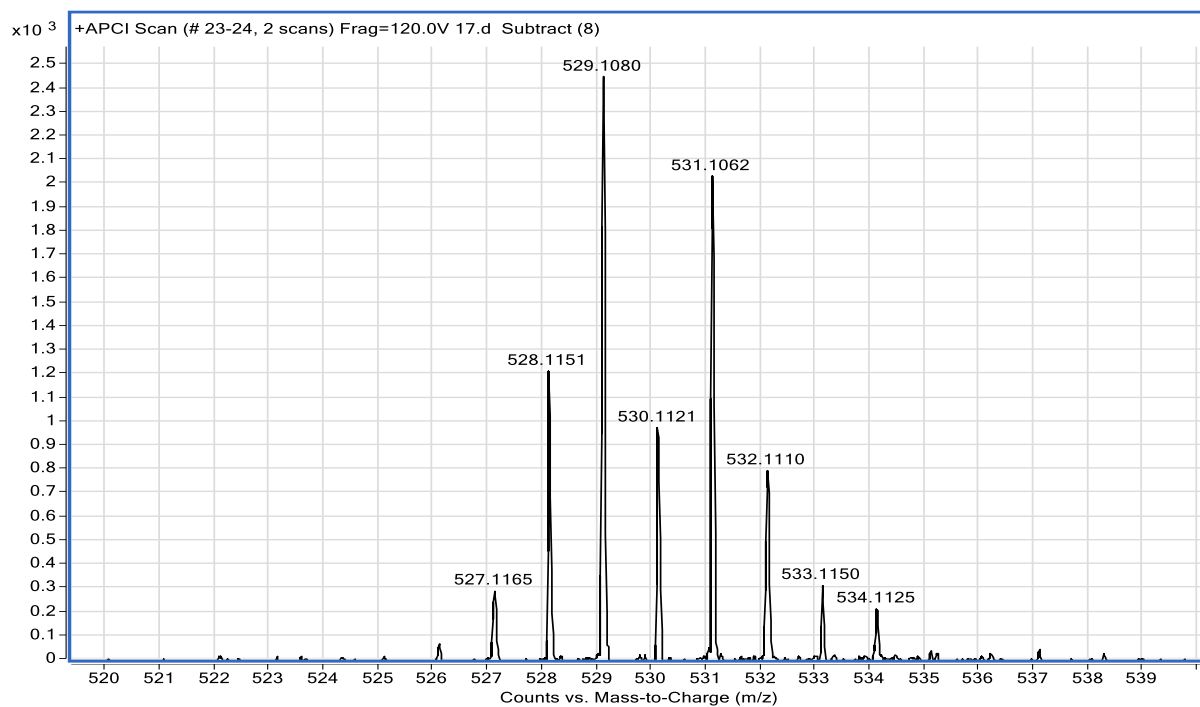

HRMS for **4h**

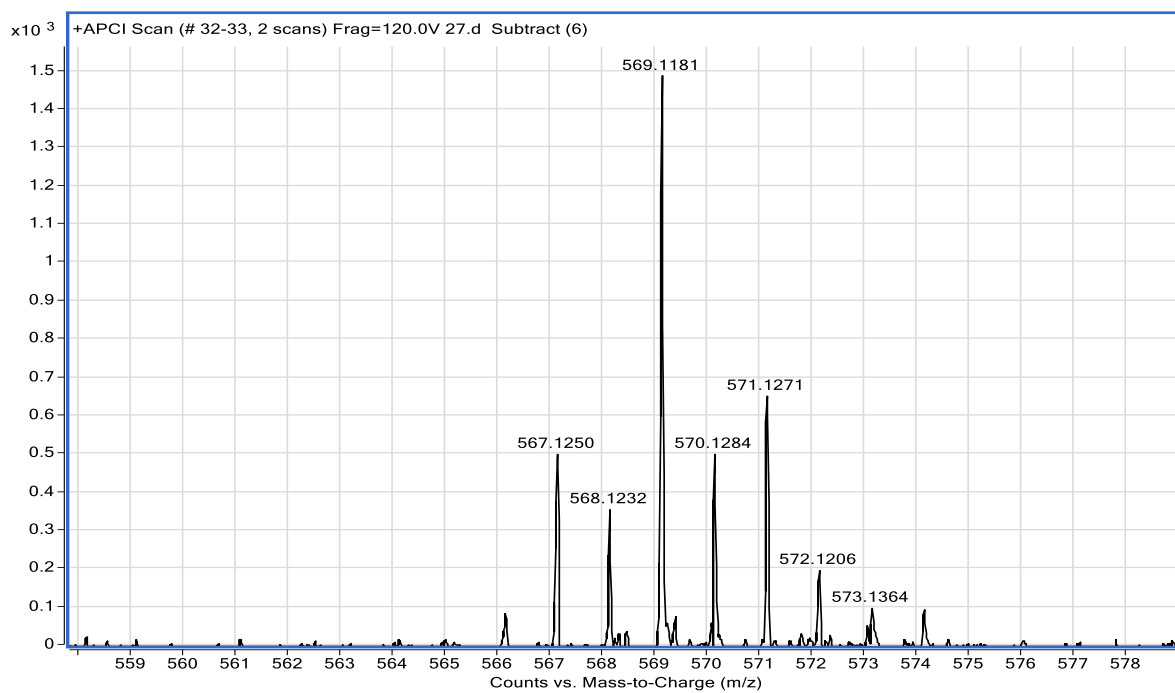

HRMS for **4i**

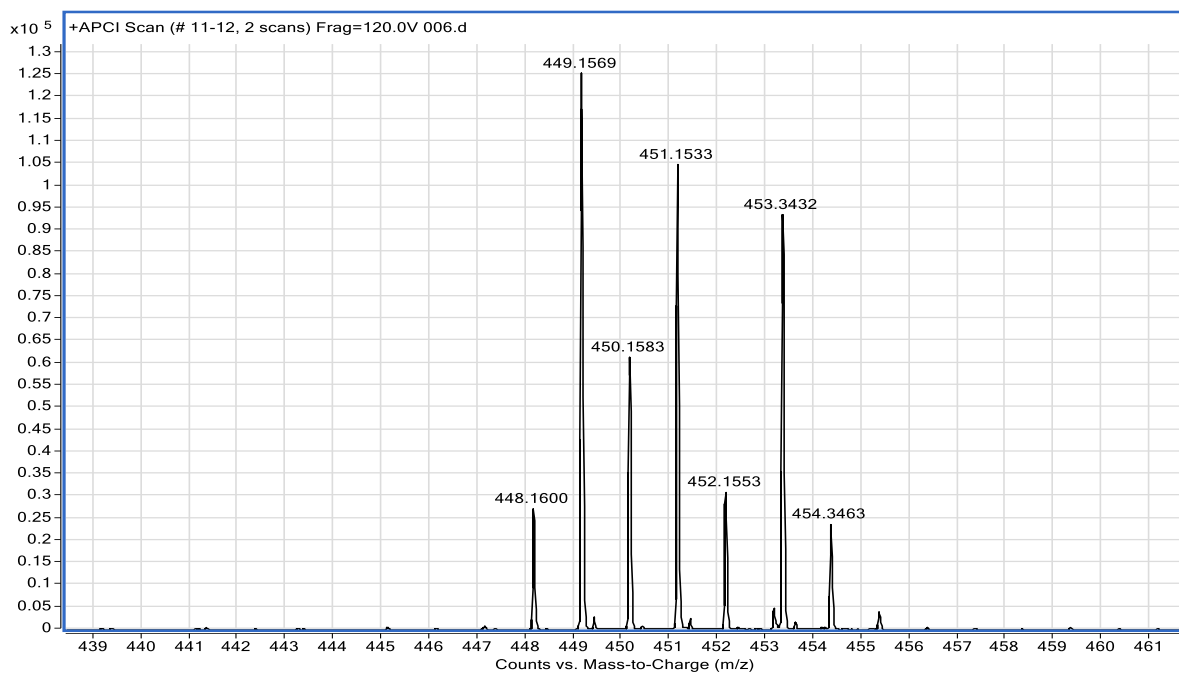

HRMS for **4j**

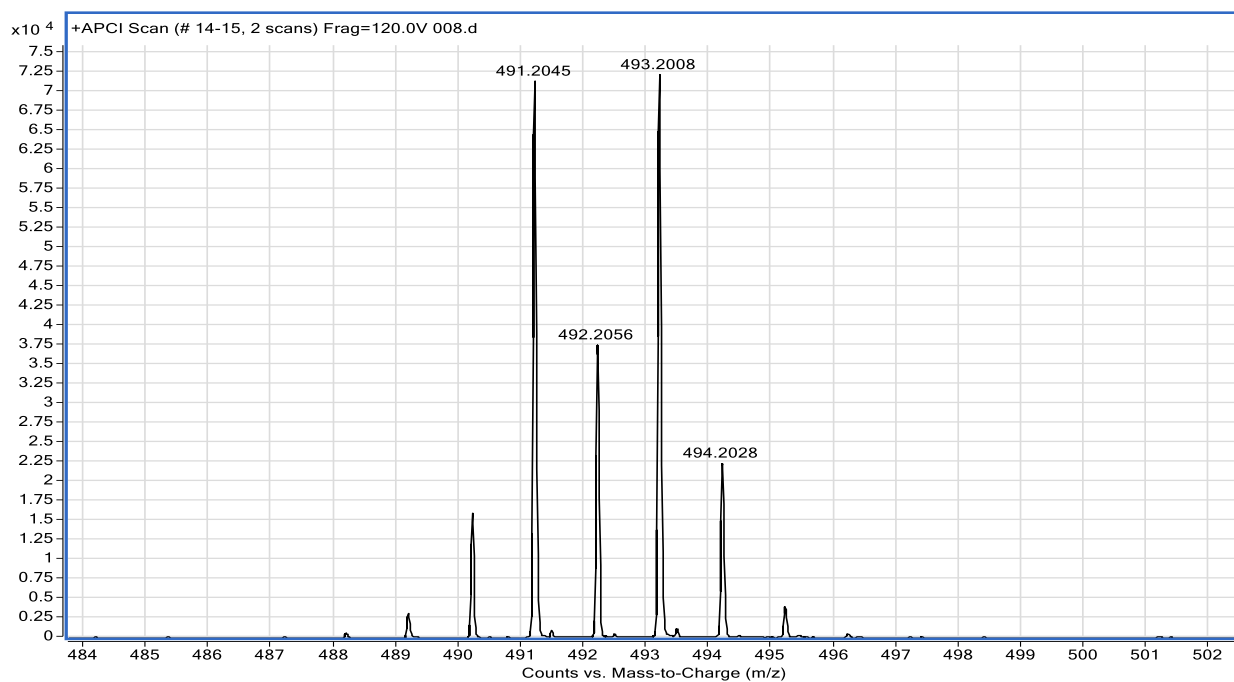

HRMS for **4k**

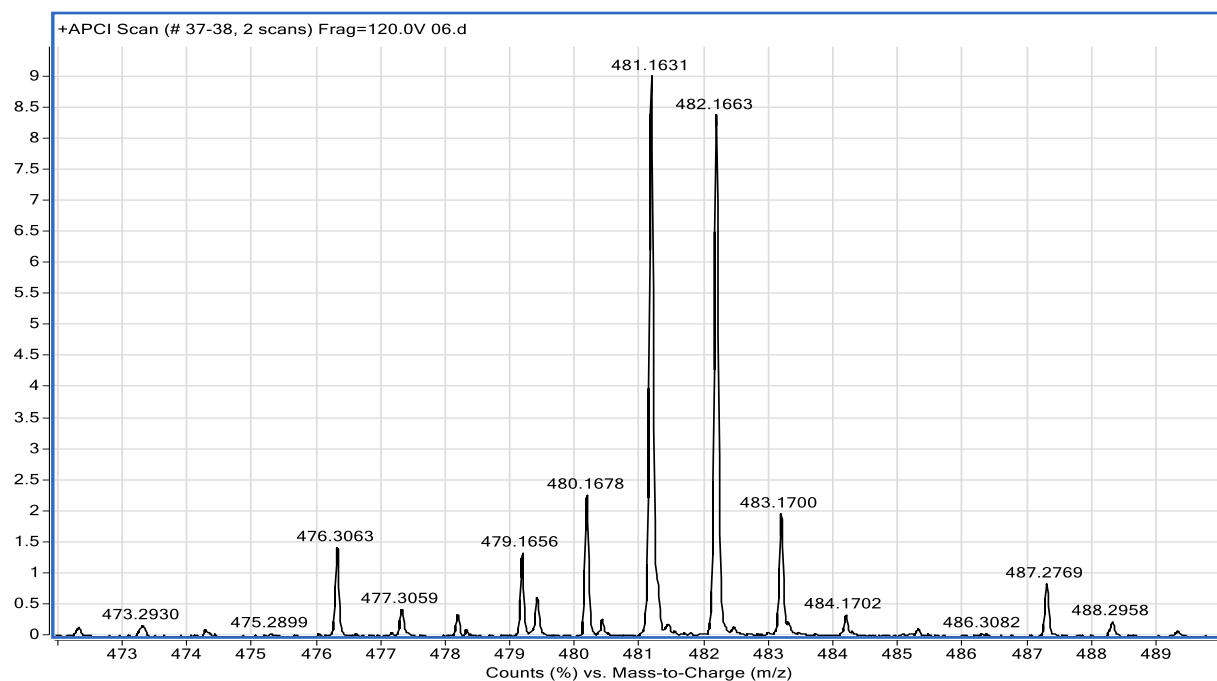

HRMS for **4l**

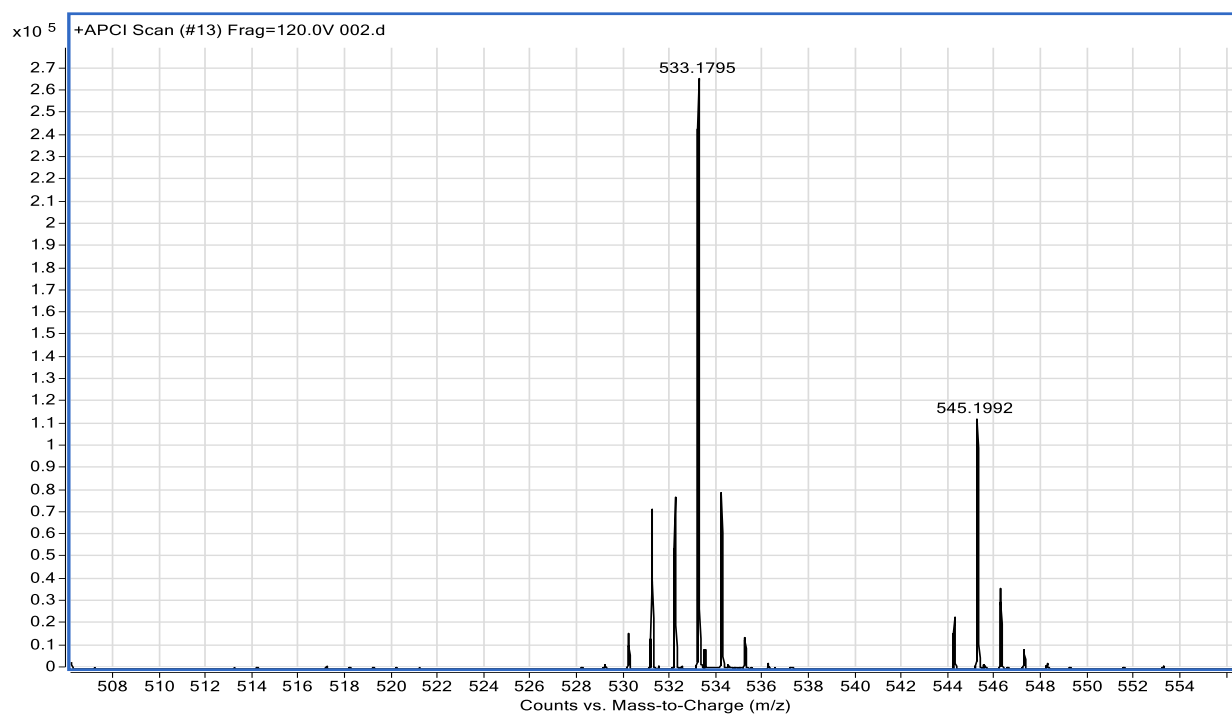

HRMS for **4n**

00006 #4-34 RT: 0.04-0.50 AV: 31 NL: 9.49E3  
T: FTMS + p ESI Full ms [100.00-1000.00]

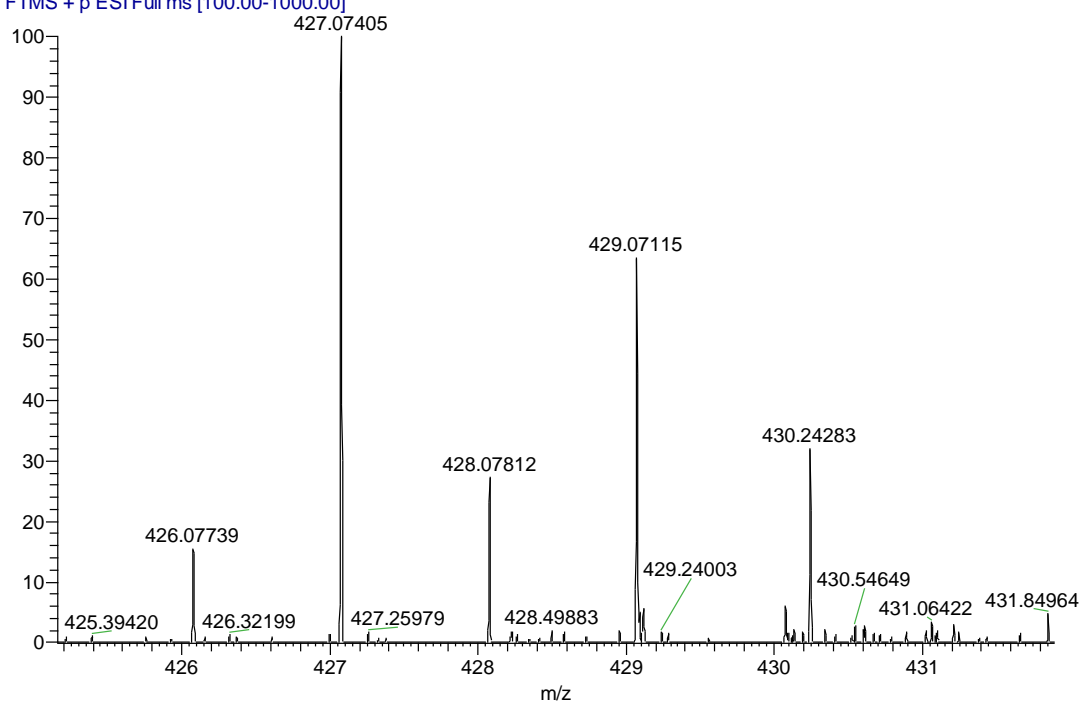

HRMS for 4o

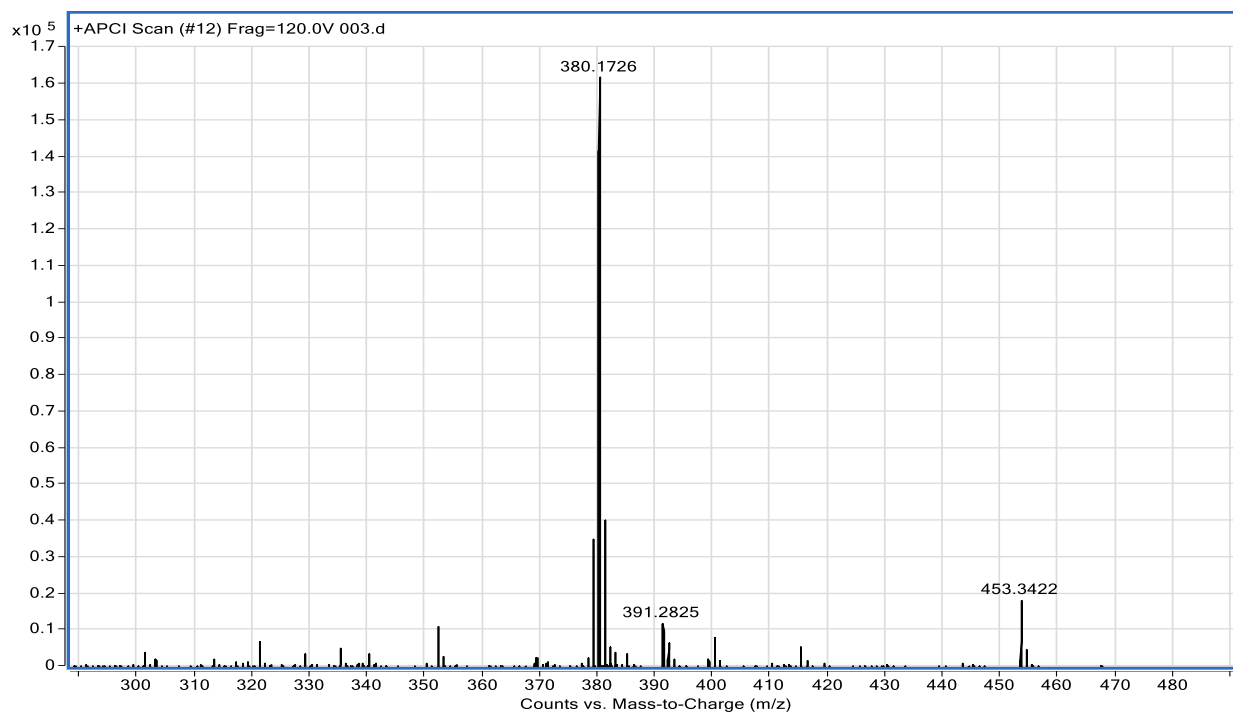

HRMS for 5a

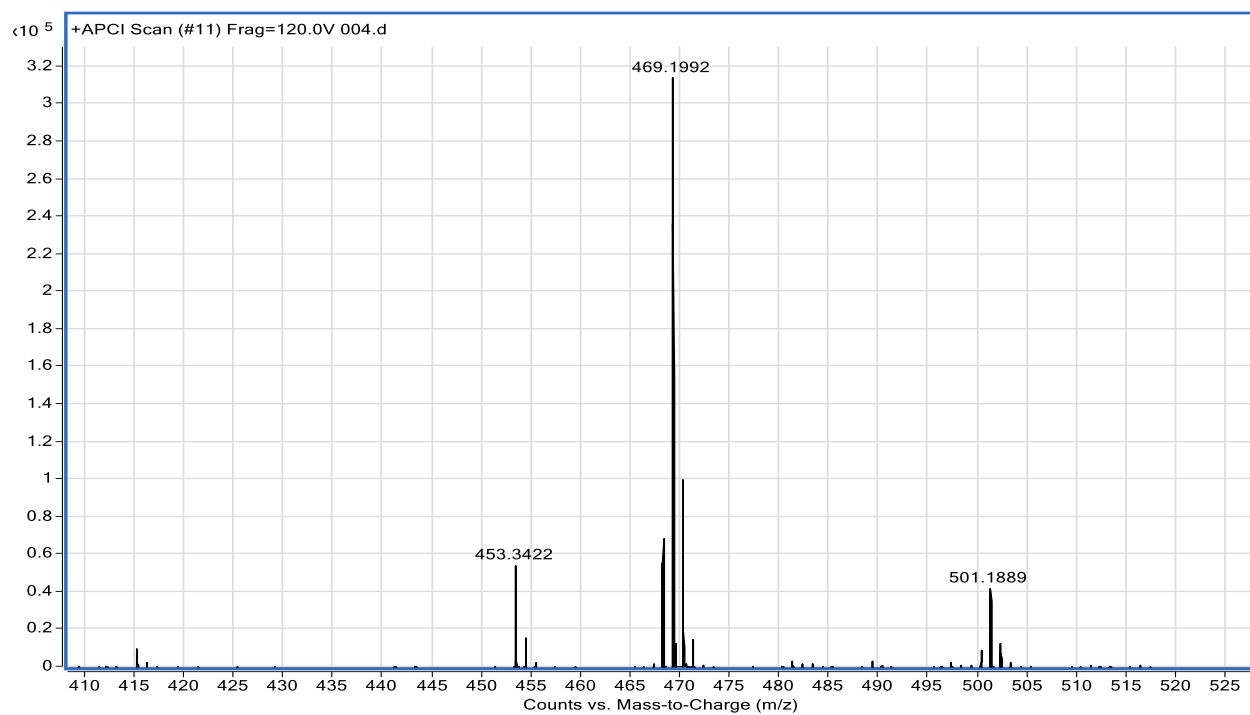

HRMS for **5b**

## REFERENCES

- (1). Isak, S.; Eyring, E. *J. Phys. Chem.* **1992**, *96*, 1738.
- (2). Killoran, J.; Allen, L.; Gallagher, J.; Gallagher, W.; O'Shea, D. F. *Chem. Commun.* **2002**, 1862.
- (3). Benson, R.; Kues, H. *Phys. Med. Biol.*, **1978**, *23*, 159.
- (4). a) Treat, N.; Sprafke, H.; Kramer, J.; Clark, P.; Barton, B.; Fors, B.; Hawker, C. *J. Am. Chem. Soc.* **2014**, *136*, 16096-16101. b) Tucker, J.; Stephenson, C. *J. Org. Chem.* **2012**, *77*, 1617-1622.
- (5). Yu, C.; Jiao, L.; Yin, H.; Zhou, J.; Pang, W.; Wu, Y.; Wang, Z.; Yang, G.; Hao, E. *Eur. J. Org. Chem.* **2011**, *2011*, 5460-5468.
- (6). Schmidt, B.; Elizarov, N.; Berger, R.; Hölter. *Org. Biomol. Chem.* **2013**, *11*, 3674.
- (7). Jasinska ,K.; Shan, W.; Zawada, K.; Kadish,K.; Gryko, D. *J. Am. Chem. Soc.* **2016**, *138*, 15451-15458.
- (8). Silvi, M.; Verrier, C.; Rey, Y.; Buzzetti, Luca.; Melchiorre, P. *Nat. Chem.* **2017**, *9*, 868-873.
- (9). Zhou, X.; Wu, Q.; Hao, E.; Jiao, L. *Chem. Asian J.* **2015**, *10*, 1979 – 1986.
- (10). (a) Luo, L.; Wu, D.; Li, W.; Zhang, S.; Ma, Y.; Yan, S.; You J. *Org. Lett.* **2014**, *16*, 6080. (b) Zhou, X.; Wu, Q.; Feng, Y.; Yu, Y.; Yu. C.; Hao, E.; Wei, Y.; Mu, X.; Jiao, L. *Chem. Asian J.* **2015**, *10*, 1979.
- (11). Gaussian 09, Revision D.01, M. J. Frisch, G. W. Trucks, H. B. Schlegel, G. E. Scuseria, M. A. Robb, J. R. Cheeseman, G. Scalmani, V. Barone, B. Mennucci, G. A. Petersson, H. Nakatsuji, M. Caricato, X. Li, H. P. Hratchian, A. F. Izmaylov, J. Bloino, G. Zheng, J. L. Sonnenberg, M. Hada, M. Ehara, K. Toyota, R. Fukuda, J. Hasegawa, M. Ishida, T. Nakajima, Y. Honda, O. Kitao, H. Nakai, T. Vreven, J. A. Montgomery, Jr., J. E. Peralta, F. Ogliaro, M. Bearpark, J. J. Heyd, E. Brothers, K. N. Kudin, V. N. Staroverov, T. Keith, R. Kobayashi, J. Normand, K. Raghavachari, A. Rendell, J. C. Burant, S. S. Iyengar, J. Tomasi, M. Cossi, N. Rega, J. M. Millam, M. Klene, J. E. Knox, J. B. Cross, V. Bakken, C. Adamo, J. Jaramillo, R. Gomperts, R. E. Stratmann, O. Yazyev, A. J. Austin, R. Cammi, C. Pomelli, J. W. Ochterski, R. L. Martin, K. Morokuma, V. G. Zakrzewski, G. A. Voth, P. Salvador, J. J. Dannenberg, S. Dapprich, A. D. Daniels, O. Farkas, J. B. Foresman, J. V. Ortiz, J. Cioslowski, and D. J. Fox, Gaussian, Inc., Wallingford CT, **2013**.
